# Supplementary material for: Molecular and physical composition of tar balls in wildfire smoke: an investigation with complementary ionisation methods and 15-Tesla FT-ICR mass spectrometry
Source: Royal Society of Chemistry journal article supplement (doi:10.1039/d3ea00085k), 2023-01-01
Supplement: d3ea00085k1.xlsx [file d3ea00085k1.xlsx]

## Sheet: DS1_formula assignments_LDI
Measured mass	Neutral formula	Class	Group	C	H	O	N	S	DBE	DBEO	O/C	H/C	Formula error (ppm)	Neutral mass	OSc	AI_mod	AImod_class	log10C0	Volatility class	Tgdry	prop.err.Tgdry	Aug0910NT_abd	BBAug0910NT_n_abd	Aug1011_abd	BBAug1011_n_abd	Aug1314_abd	BBAug1314_n_abd
203.056	C8H12O6	O6	CHO	8	12	6	0	0	3	-3	0.75	1.5	-0.0359507	204.063	0	0	Aliphatic	1.99298	SVOC	285.649	177.513	1.4772e+06	1.01118	3.35897e+06	1.2018	831339	0.227242
215.056	C9H12O6	O6	CHO	9	12	6	0	0	4	-2	0.666667	1.33333	-0.0290622	216.063	0	0.166667	High O unsaturated	1.66377	SVOC	288.119	178.101	1.1328e+06	0.775434	2.01556e+06	0.721141	665812	0.181996
201.04	C8H10O6	O6	CHO	8	10	6	0	0	4	-2	0.75	1.25	-0.0442697	202.048	0.25	0.2	High O unsaturated	1.71558	SVOC	285.081	176.675	756606	0.517919	1.57433e+06	0.563275	706482	0.193113
209.009	C9H6O6	O6	CHO	9	6	6	0	0	7	1	0.666667	0.666667	-0.0339698	210.016	0.666667	0.666667	Aromatic	0.831566	SVOC	284.194	175.13	470233	0.321888	1.47951e+06	0.529352	1.52816e+06	0.417713
187.061	C8H12O5	O5	CHO	8	12	5	0	0	3	-2	0.625	1.5	-0.0352826	188.068	-0.25	0.0909091	High O unsaturated	3.12371	IVOC	273.204	177.214	1.41922e+06	0.971497	1.293e+06	0.462618	544813	0.148922
189.04	C7H10O6	O6	CHO	7	10	6	0	0	3	-3	0.857143	1.42857	-0.0513118	190.048	0.285714	0	Aliphatic	1.99948	SVOC	282.808	176.08	805675	0.551508	1.38695e+06	0.496234	876588	0.239611
191.02	C6H8O7	O7	CHO	6	8	7	0	0	3	-4	1.16667	1.33333	-0.0476391	192.027	1	0	Aliphatic	0.61088	SVOC	292.479	174.827	462430	0.316547	1.35306e+06	0.48411	NA	NA
223.025	C10H8O6	O6	CHO	10	8	6	0	0	7	1	0.6	0.8	-0.00448381	224.032	0.4	0.571429	Aromatic	0.742926	SVOC	287.109	176.74	458925	0.314147	943195	0.337464	1.20266e+06	0.32874
231.051	C9H12O7	O7	CHO	9	12	7	0	0	4	-3	0.777778	1.33333	-0.0419821	232.058	0.222222	0.0909091	High O unsaturated	0.508726	SVOC	298.199	178.392	576843	0.394866	1.1968e+06	0.428201	849982	0.232338
181.014	C8H6O5	O5	CHO	8	6	5	0	0	6	1	0.625	0.75	-0.0323179	182.022	0.5	0.636364	Aromatic	2.29151	SVOC	271.043	174.348	765872	0.524261	1.1964e+06	0.428057	1.17986e+06	0.322508
175.025	C6H8O6	O6	CHO	6	8	6	0	0	3	-3	1	1.33333	-0.027996	176.032	0.666667	0	Aliphatic	1.94933	SVOC	280.875	174.577	622027	0.425795	1.19531e+06	0.427668	1.11386e+06	0.304468
275.041	C10H12O9	O9	CHO	10	12	9	0	0	5	-4	0.9	1.2	-0.115074	276.048	0.6	0.0909091	High O unsaturated	-2.21148	LVOC	315.8	179.504	168569	0.11539	592127	0.211856	1.18044e+06	0.322668
193.035	C6H10O7	O7	CHO	6	10	7	0	0	2	-5	1.16667	1.66667	-0.0582795	194.043	0.666667	0	Aliphatic	0.88828	SVOC	291.787	175.688	205046	0.14036	333306	0.119253	1.15203e+06	0.3149
265.035	C12H10O7	O7	CHO	12	10	7	0	0	8	1	0.583333	0.833333	-0.127153	266.043	0.333333	0.529412	Aromatic	-0.809137	LVOC	300.984	179.039	242756	0.166174	632353	0.226248	1.14296e+06	0.312422
207.03	C10H8O5	O5	CHO	10	8	5	0	0	7	2	0.5	0.8	-0.158673	208.037	0.2	0.6	Aromatic	1.76193	SVOC	275.655	176.409	603053	0.412807	952684	0.340858	1.13998e+06	0.311606
225.004	C9H6O7	O7	CHO	9	6	7	0	0	7	0	0.777778	0.666667	-0.0857762	226.011	0.888889	0.636364	Aromatic	-0.323474	SVOC	294.274	175.426	222677	0.152429	1.09748e+06	0.392663	1.13974e+06	0.311542
279.051	C13H12O7	O7	CHO	13	12	7	0	0	8	1	0.538462	0.923077	-0.231499	280.058	0.153846	0.473684	High O unsaturated	-0.933954	LVOC	304.527	180.469	275160	0.188355	590419	0.211245	1.11903e+06	0.305882
229.072	C10H14O6	O6	CHO	10	14	6	0	0	4	-2	0.6	1.4	-0.0462737	230.079	-0.2	0.142857	High O unsaturated	1.57513	SVOC	291.552	179.463	863893	0.59136	1.08455e+06	0.388038	534715	0.146161
301.057	C12H14O9	O9	CHO	12	14	9	0	0	6	-3	0.75	1.16667	0.144823	302.064	0.333333	0.2	High O unsaturated	-2.48399	LVOC	319.652	181.435	208543	0.142754	580196	0.207587	1.07554e+06	0.293994
287.041	C11H12O9	O9	CHO	11	12	9	0	0	6	-3	0.818182	1.09091	-0.122979	288.048	0.545455	0.230769	High O unsaturated	-2.46899	LVOC	316.856	180.057	148519	0.101666	501471	0.17942	1.06592e+06	0.291364
251.02	C11H8O7	O7	CHO	11	8	7	0	0	8	1	0.636364	0.727273	-0.0139431	252.027	0.545455	0.6	Aromatic	-0.708941	LVOC	297.598	177.519	233532	0.15986	740870	0.265074	1.06194e+06	0.290276
245.067	C10H14O7	O7	CHO	10	14	7	0	0	4	-3	0.7	1.4	-0.0110174	246.074	0	0.0769231	High O unsaturated	0.471891	SVOC	301.236	179.766	693091	0.474441	1.05013e+06	0.375725	652794	0.178438
295.046	C13H12O8	O8	CHO	13	12	8	0	0	8	0	0.615385	0.923077	0.00847326	296.053	0.307692	0.444444	High O unsaturated	-1.9775	LVOC	312.061	180.783	185371	0.126892	480462	0.171903	1.03697e+06	0.28345
249.04	C12H10O6	O6	CHO	12	10	6	0	0	8	2	0.5	0.833333	-0.199767	250.048	0.166667	0.555556	Aromatic	0.202326	SVOC	291.985	178.71	359995	0.246427	674903	0.241472	1.02987e+06	0.28151
247.046	C9H12O8	O8	CHO	9	12	8	0	0	4	-4	0.888889	1.33333	-0.0346089	248.053	0.444444	0	Aliphatic	-0.714545	LVOC	306.931	178.663	295567	0.202324	1.02475e+06	0.366642	923429	0.252414
271.046	C11H12O8	O8	CHO	11	12	8	0	0	6	-2	0.727273	1.09091	-0.19148	272.053	0.363636	0.285714	High O unsaturated	-1.28117	LVOC	309.731	179.782	239709	0.164088	575807	0.206017	1.00891e+06	0.275781
259.046	C10H12O8	O8	CHO	10	12	8	0	0	5	-3	0.8	1.2	0.0310756	260.053	0.4	0.166667	High O unsaturated	-0.978941	LVOC	308.401	179.24	329528	0.225572	853253	0.305283	1.00757e+06	0.275414
165.019	C8H6O4	O4	CHO	8	6	4	0	0	6	2	0.5	0.75	-0.00908984	166.027	0.25	0.666667	Aromatic	3.32153	IVOC	255.811	174.019	606181	0.414948	993283	0.355384	900587	0.246171
217.072	C9H14O6	O6	CHO	9	14	6	0	0	3	-3	0.666667	1.55556	-0.0283316	218.079	-0.222222	0	Aliphatic	1.94117	SVOC	288.992	178.885	787028	0.538743	971985	0.347764	528924	0.144579
245.03	C9H10O8	O8	CHO	9	10	8	0	0	5	-3	0.888889	1.11111	-0.142431	246.038	0.666667	0.2	High O unsaturated	-0.991945	LVOC	305.899	177.796	178050	0.12188	691621	0.247453	960862	0.262646
233.03	C8H10O8	O8	CHO	8	10	8	0	0	4	-4	1	1.25	0.0030039	234.038	0.75	0	Aliphatic	-0.772474	LVOC	304.719	177.214	204790	0.140185	667558	0.238844	953961	0.26076
307.046	C14H12O8	O8	CHO	14	12	8	0	0	9	1	0.571429	0.857143	0.18678	308.053	0.285714	0.5	High O unsaturated	-2.36326	LVOC	313.095	181.246	174659	0.119559	478197	0.171093	944590	0.258199
313.056	C13H14O9	O9	CHO	13	14	9	0	0	7	-2	0.692308	1.07692	-0.0285891	314.064	0.307692	0.294118	High O unsaturated	-2.80651	LVOC	320.805	181.954	162846	0.111473	417509	0.149379	941616	0.257386
289.057	C11H14O9	O9	CHO	11	14	9	0	0	5	-4	0.818182	1.27273	0.0953101	290.064	0.363636	0.0769231	High O unsaturated	-2.19159	LVOC	318.398	180.889	239551	0.163979	566256	0.202599	941167	0.257263
185.046	C8H10O5	O5	CHO	8	10	5	0	0	4	-1	0.625	1.25	-0.0591746	186.053	0	0.272727	High O unsaturated	2.84631	IVOC	272.635	176.375	549961	0.376464	937273	0.335345	357388	0.0976901
321.061	C15H14O8	O8	CHO	15	14	8	0	0	9	1	0.533333	0.933333	-0.384038	322.069	0.133333	0.454545	High O unsaturated	-2.49231	LVOC	316.632	182.609	175270	0.119978	405523	0.145091	931425	0.2546
201.077	C9H14O5	O5	CHO	9	14	5	0	0	3	-2	0.555556	1.55556	-0.0372992	202.084	-0.444444	0.0769231	High O unsaturated	3.01335	IVOC	277.069	178.572	931346	0.637533	782579	0.279997	449601	0.122896
273.062	C11H14O8	O8	CHO	11	14	8	0	0	5	-3	0.727273	1.27273	-0.194279	274.069	0.181818	0.142857	High O unsaturated	-1.00377	LVOC	311.272	180.615	331370	0.226833	703771	0.251801	928335	0.253755
291.051	C14H12O7	O7	CHO	14	12	7	0	0	9	2	0.5	0.857143	-0.0908775	292.058	0.142857	0.52381	Aromatic	-1.35727	LVOC	305.802	180.923	229284	0.156952	513582	0.183753	927767	0.2536
285.062	C12H14O8	O8	CHO	12	14	8	0	0	6	-2	0.666667	1.16667	0.0368341	286.069	0.166667	0.25	High O unsaturated	-1.33815	LVOC	312.776	181.152	293101	0.200636	595817	0.213176	925420	0.252958
267.051	C12H12O7	O7	CHO	12	12	7	0	0	7	0	0.583333	1	-0.169069	268.058	0.166667	0.411765	High O unsaturated	-0.531737	LVOC	303.149	179.991	258549	0.176984	497410	0.177967	923034	0.252306
217.035	C8H10O7	O7	CHO	8	10	7	0	0	4	-3	0.875	1.25	-0.0241896	218.043	0.5	0.111111	High O unsaturated	0.504286	SVOC	295.604	176.954	359785	0.246283	921475	0.329692	837975	0.229056
297.062	C13H14O8	O8	CHO	13	14	8	0	0	7	-1	0.615385	1.07692	-0.10991	298.069	0.153846	0.333333	High O unsaturated	-1.7001	LVOC	314.159	181.662	216350	0.148098	450693	0.161252	915331	0.250201
309.062	C14H14O8	O8	CHO	14	14	8	0	0	8	0	0.571429	1	-0.220506	310.069	0.142857	0.4	High O unsaturated	-2.08586	LVOC	315.44	182.146	198938	0.136179	448786	0.16057	908309	0.248281
263.056	C13H12O6	O6	CHO	13	12	6	0	0	8	2	0.461538	0.923077	-0.253558	264.063	0	0.5	Low O unsaturated	0.0368102	SVOC	295.828	180.131	324260	0.221965	562115	0.201118	902115	0.246588
173.046	C7H10O5	O5	CHO	7	10	5	0	0	3	-2	0.714286	1.42857	-0.0485421	174.053	0	0.111111	High O unsaturated	3.19473	IVOC	269.768	175.795	865646	0.59256	901696	0.322616	479899	0.131178
221.009	C10H6O6	O6	CHO	10	6	6	0	0	8	2	0.6	0.6	-0.25836	222.016	0.6	0.714286	Condensed aromatic	0.465526	SVOC	284.825	175.579	292262	0.200062	726204	0.259827	901542	0.246432
293.03	C13H10O8	O8	CHO	13	10	8	0	0	9	1	0.615385	0.769231	0.125072	294.038	0.461538	0.555556	Aromatic	-2.2549	LVOC	309.58	179.807	124442	0.0851845	433517	0.155107	897600	0.245354
235.025	C11H8O6	O6	CHO	11	8	6	0	0	8	2	0.545455	0.727273	0.00723328	236.032	0.363636	0.625	Aromatic	0.346561	SVOC	288.272	177.2	390684	0.267435	752333	0.269176	897325	0.245279
277.035	C13H10O7	O7	CHO	13	10	7	0	0	9	2	0.538462	0.769231	0.0604616	278.043	0.307692	0.578947	Aromatic	-1.21135	LVOC	302.046	179.491	231376	0.158384	536928	0.192106	896312	0.245002
293.067	C14H14O7	O7	CHO	14	14	7	0	0	8	1	0.5	1	-0.0603958	294.074	0	0.428571	High O unsaturated	-1.07987	LVOC	308.147	181.824	245640	0.168148	467129	0.167133	896042	0.244928
305.067	C15H14O7	O7	CHO	15	14	7	0	0	9	2	0.466667	0.933333	-0.202906	306.074	0	0.478261	Low O unsaturated	-1.52142	LVOC	309.564	182.278	226482	0.155034	431858	0.154513	862810	0.235844
283.046	C12H12O8	O8	CHO	12	12	8	0	0	7	-1	0.666667	1	0.10069	284.053	0.333333	0.375	High O unsaturated	-1.61555	LVOC	310.945	180.296	180908	0.123837	444451	0.159019	861911	0.235599
206.994	C9H4O6	O6	CHO	9	4	6	0	0	8	2	0.666667	0.444444	-0.0304357	208.001	0.888889	0.833333	Condensed aromatic	0.554166	SVOC	281.898	173.822	345638	0.236599	860383	0.307834	769308	0.210286
317.051	C12H14O10	O10	CHO	12	14	10	0	0	6	-4	0.833333	1.16667	-0.0234978	318.059	0.5	0.142857	High O unsaturated	-3.68338	ELVOC	325.802	181.702	128460	0.0879348	429569	0.153695	857459	0.234382
237.04	C11H10O6	O6	CHO	11	10	6	0	0	7	1	0.545455	0.909091	-0.0348042	238.048	0.181818	0.5	High O unsaturated	0.623961	SVOC	290.503	178.245	371920	0.25459	683225	0.244449	855311	0.233795
281.03	C12H10O8	O8	CHO	12	10	8	0	0	8	0	0.666667	0.833333	0.103725	282.038	0.5	0.5	High O unsaturated	-1.89295	LVOC	308.779	179.345	156254	0.106961	452783	0.162	854134	0.233473
257.03	C10H10O8	O8	CHO	10	10	8	0	0	6	-2	0.8	1	-0.207563	258.038	0.6	0.333333	High O unsaturated	-1.25634	LVOC	306.953	178.343	147011	0.100633	436173	0.156057	850027	0.23235
239.02	C10H8O7	O7	CHO	10	8	7	0	0	7	0	0.7	0.8	-0.10292	240.027	0.6	0.538462	Aromatic	-0.360309	SVOC	296.793	177.047	202788	0.138815	567921	0.203195	847390	0.231629
221.046	C11H10O5	O5	CHO	11	10	5	0	0	7	2	0.454545	0.909091	-0.158565	222.053	0	0.529412	Aromatic	1.59453	SVOC	279.473	177.903	463104	0.317008	702521	0.251353	835579	0.228401
315.072	C13H16O9	O9	CHO	13	16	9	0	0	6	-3	0.692308	1.23077	-0.188846	316.079	0.153846	0.176471	High O unsaturated	-2.52911	LVOC	322.622	182.753	225189	0.154149	487514	0.174426	826964	0.226046
325.057	C14H14O9	O9	CHO	14	14	9	0	0	8	-1	0.642857	1	0.228268	326.064	0.285714	0.368421	High O unsaturated	-3.15523	LVOC	321.873	182.447	131485	0.0900052	366762	0.131223	817616	0.223491
243.051	C10H12O7	O7	CHO	10	12	7	0	0	5	-2	0.7	1.2	-0.00637726	244.058	0.2	0.230769	High O unsaturated	0.194491	SVOC	300.012	178.957	450258	0.308214	813407	0.291027	804281	0.219846
187.025	C7H8O6	O6	CHO	7	8	6	0	0	4	-2	0.857143	1.14286	-0.0478546	188.032	0.571429	0.25	High O unsaturated	1.72208	SVOC	282.756	175.176	385834	0.264115	812304	0.290632	631392	0.172588
299.041	C12H12O9	O9	CHO	12	12	9	0	0	7	-2	0.75	1	0.125903	300.048	0.5	0.333333	High O unsaturated	-2.76139	LVOC	317.821	180.58	114832	0.0786059	385209	0.137823	811989	0.221953
329.051	C13H14O10	O10	CHO	13	14	10	0	0	7	-3	0.769231	1.07692	0.225041	330.059	0.461538	0.25	High O unsaturated	-3.96758	ELVOC	326.75	182.229	92574.8	0.0633702	355595	0.127228	803622	0.219666
205.014	C10H6O5	O5	CHO	10	6	5	0	0	8	3	0.5	0.6	-0.0343879	206.022	0.4	0.733333	Condensed aromatic	1.48453	SVOC	273.371	175.246	444842	0.304508	801431	0.286742	670964	0.183404
303.051	C15H12O7	O7	CHO	15	12	7	0	0	10	3	0.466667	0.8	-0.289885	304.058	0.133333	0.565217	Aromatic	-1.79882	LVOC	306.989	181.356	166207	0.113774	396312	0.141796	800577	0.218833
229.035	C9H10O7	O7	CHO	9	10	7	0	0	5	-2	0.777778	1.11111	0.0233588	230.043	0.444444	0.272727	High O unsaturated	0.231326	SVOC	297.167	177.524	349146	0.239001	719408	0.257395	797890	0.218099
211.025	C9H8O6	O6	CHO	9	8	6	0	0	6	0	0.666667	0.888889	-0.027248	212.032	0.444444	0.5	High O unsaturated	1.10897	SVOC	285.823	176.252	301484	0.206374	569647	0.203812	795789	0.217525
319.046	C15H12O8	O8	CHO	15	12	8	0	0	10	2	0.533333	0.8	-0.12412	320.053	0.266667	0.545455	Aromatic	-2.76971	LVOC	314.058	181.688	126223	0.0864032	345410	0.123584	793560	0.216915
337.057	C15H14O9	O9	CHO	15	14	9	0	0	9	0	0.6	0.933333	0.198631	338.064	0.266667	0.428571	High O unsaturated	-3.52687	ELVOC	322.868	182.918	123648	0.0846404	365128	0.130638	791583	0.216375
327.072	C14H16O9	O9	CHO	14	16	9	0	0	7	-2	0.642857	1.14286	-0.200109	328.079	0.142857	0.263158	High O unsaturated	-2.87783	LVOC	323.904	183.266	190613	0.13048	394717	0.141225	790949	0.216202
339.072	C15H16O9	O9	CHO	15	16	9	0	0	8	-1	0.6	1.06667	0.0289024	340.079	0.133333	0.333333	High O unsaturated	-3.24947	LVOC	325.098	183.754	148447	0.101616	349550	0.125065	789690	0.215857
205.035	C7H10O7	O7	CHO	7	10	7	0	0	3	-4	1	1.42857	-0.0431633	206.043	0.571429	0	Aliphatic	0.727126	SVOC	293.832	176.344	321821	0.220296	776598	0.277857	788758	0.215603
261.04	C13H10O6	O6	CHO	13	10	6	0	0	9	3	0.461538	0.769231	-0.0469276	262.048	0.153846	0.6	Aromatic	-0.24059	SVOC	293.347	179.152	292432	0.200178	545662	0.195231	786650	0.215027
323.041	C14H12O9	O9	CHO	14	12	9	0	0	9	0	0.642857	0.857143	0.0243003	324.048	0.428571	0.473684	High O unsaturated	-3.43263	LVOC	319.529	181.549	94544.5	0.0647185	323928	0.115897	778144	0.212701
253.035	C11H10O7	O7	CHO	11	10	7	0	0	7	0	0.636364	0.909091	-0.0302329	254.043	0.363636	0.466667	High O unsaturated	-0.431541	SVOC	299.829	178.562	223282	0.152843	525406	0.187984	774553	0.21172
256.997	C6H10O9S	O9S	CHOS	6	10	9	0	1	2	-7	1.5	1.66667	-0.0291832	258.005	0.333333	0	Aliphatic	-3.18686	LVOC	NA	NA	NA	NA	NA	NA	769056	0.210217
311.041	C13H12O9	O9	CHO	13	12	9	0	0	8	-1	0.692308	0.923077	0.110436	312.048	0.461538	0.411765	High O unsaturated	-3.08391	LVOC	318.707	181.077	107254	0.0734187	314730	0.112607	762150	0.20833
247.025	C12H8O6	O6	CHO	12	8	6	0	0	9	3	0.5	0.666667	-0.173262	248.032	0.333333	0.666667	Aromatic	-0.075074	SVOC	289.334	177.635	259636	0.177728	557039	0.199302	758821	0.20742
305.051	C11H14O10	O10	CHO	11	14	10	0	0	5	-5	0.909091	1.27273	0.171938	306.059	0.545455	0	Aliphatic	-3.43153	LVOC	324.772	181.146	113369	0.0776043	361486	0.129335	757752	0.207127
195.03	C9H8O5	O5	CHO	9	8	5	0	0	6	1	0.555556	0.888889	-0.0384556	196.037	0.222222	0.538462	Aromatic	2.18115	SVOC	273.901	175.935	427413	0.292577	647540	0.231682	757663	0.207103
193.014	C9H6O5	O5	CHO	9	6	5	0	0	7	2	0.555556	0.666667	-0.0512916	194.022	0.444444	0.692308	Condensed aromatic	1.90375	SVOC	272.272	174.811	452650	0.309852	756676	0.270729	756481	0.20678
343.067	C14H16O10	O10	CHO	14	16	10	0	0	7	-3	0.714286	1.14286	0.226632	344.074	0.285714	0.222222	High O unsaturated	-4.00267	ELVOC	329.659	183.547	147771	0.101154	382223	0.136755	755014	0.206379
289.035	C14H10O7	O7	CHO	14	10	7	0	0	10	3	0.5	0.714286	-0.218831	290.043	0.285714	0.619048	Aromatic	-1.63467	LVOC	303.029	179.921	152670	0.104507	373385	0.133592	750710	0.205202
237.004	C10H6O7	O7	CHO	10	6	7	0	0	8	1	0.7	0.6	-0.0900828	238.011	0.8	0.692308	Condensed aromatic	-0.637709	LVOC	294.509	175.888	171512	0.117405	576680	0.206329	749984	0.205004
255.051	C11H12O7	O7	CHO	11	12	7	0	0	6	-1	0.636364	1.09091	-0.110174	256.058	0.181818	0.333333	High O unsaturated	-0.154141	SVOC	301.652	179.489	272526	0.186552	529561	0.18947	749980	0.205003
219.03	C11H8O5	O5	CHO	11	8	5	0	0	8	3	0.454545	0.727273	-0.0210017	220.037	0.181818	0.647059	Aromatic	1.31713	SVOC	277.242	176.856	487625	0.333794	749923	0.268313	728568	0.19915
331.067	C13H16O10	O10	CHO	13	16	10	0	0	6	-4	0.769231	1.23077	-0.243908	332.074	0.307692	0.125	High O unsaturated	-3.69018	ELVOC	328.568	183.027	142000	0.0972029	399609	0.142975	746978	0.204183
351.072	C16H16O9	O9	CHO	16	16	9	0	0	9	0	0.5625	1	-0.0864495	352.079	0.125	0.391304	High O unsaturated	-3.64129	ELVOC	326.214	184.222	126952	0.0869021	323719	0.115823	743435	0.203214
219.051	C8H12O7	O7	CHO	8	12	7	0	0	3	-4	0.875	1.5	-0.0545535	220.058	0.25	0	Aliphatic	0.781686	SVOC	296.172	177.79	306272	0.209652	737351	0.263815	541753	0.148085
263.02	C12H8O7	O7	CHO	12	8	7	0	0	9	2	0.583333	0.666667	-0.0910578	264.027	0.5	0.647059	Aromatic	-1.08654	LVOC	298.333	177.965	164808	0.112816	449098	0.160682	731992	0.200086
261.062	C10H14O8	O8	CHO	10	14	8	0	0	4	-4	0.8	1.4	0.0114915	262.069	0.2	0	Aliphatic	-0.701541	LVOC	309.625	180.047	334918	0.229261	731068	0.261567	715767	0.195651
281.067	C13H14O7	O7	CHO	13	14	7	0	0	7	0	0.538462	1.07692	0.0297083	282.074	0	0.368421	High O unsaturated	-0.656554	LVOC	306.624	181.349	275208	0.188388	487223	0.174322	729227	0.19933
341.052	C14H14O10	O10	CHO	14	14	10	0	0	8	-2	0.714286	1	0.331035	342.059	0.428571	0.333333	High O unsaturated	-4.28007	ELVOC	327.628	182.73	84605.1	0.0579146	282091	0.100929	721594	0.197244
251.056	C12H12O6	O6	CHO	12	12	6	0	0	7	1	0.5	1	-0.00219075	252.063	0	0.444444	High O unsaturated	0.479726	SVOC	294.15	179.665	350391	0.239853	574188	0.205437	717759	0.196196
335.077	C16H16O8	O8	CHO	16	16	8	0	0	9	1	0.5	1	-0.123703	336.084	0	0.416667	High O unsaturated	-2.63947	LVOC	320.164	183.906	164269	0.112447	328993	0.11771	714929	0.195422
303.036	C11H12O10	O10	CHO	11	12	10	0	0	6	-4	0.909091	1.09091	0.27175	304.043	0.727273	0.166667	High O unsaturated	-3.70893	ELVOC	323.231	180.316	73799.5	0.0505179	345377	0.123572	712454	0.194745
315.036	C12H12O10	O10	CHO	12	12	10	0	0	7	-3	0.833333	1	-0.269017	316.043	0.666667	0.285714	High O unsaturated	-3.96078	ELVOC	323.971	180.848	60326.9	0.0412955	267776	0.095807	707872	0.193493
349.056	C16H14O9	O9	CHO	16	14	9	0	0	10	1	0.5625	0.875	-0.208849	350.064	0.25	0.478261	High O unsaturated	-3.91869	ELVOC	323.798	183.368	103733	0.0710085	297319	0.106377	704587	0.192595
241.035	C10H10O7	O7	CHO	10	10	7	0	0	6	-1	0.7	1	-0.241043	242.043	0.4	0.384615	High O unsaturated	-0.0829093	SVOC	298.565	178.059	197884	0.135458	438422	0.156862	703803	0.192381
269.03	C11H10O8	O8	CHO	11	10	8	0	0	7	-1	0.727273	0.909091	-0.0594729	270.038	0.545455	0.428571	High O unsaturated	-1.55857	LVOC	307.908	178.858	122724	0.0840082	355720	0.127272	703497	0.192297
268.997	C7H10O9S	O9S	CHOS	7	10	9	0	1	3	-6	1.28571	1.42857	-0.155206	270.004	0.285714	0	Aliphatic	-3.43985	LVOC	NA	NA	NA	NA	NA	NA	702636	0.192062
283.013	C8H12O9S	O9S	CHOS	8	12	9	0	1	3	-6	1.125	1.5	0.0284439	284.02	0	0	Aliphatic	-3.42459	LVOC	NA	NA	NA	NA	NA	NA	701724	0.191813
323.077	C15H16O8	O8	CHO	15	16	8	0	0	8	0	0.533333	1.06667	-0.0241428	324.085	0	0.363636	High O unsaturated	-2.21491	LVOC	318.862	183.447	185788	0.127177	365119	0.130635	695223	0.190036
333.062	C16H14O8	O8	CHO	16	14	8	0	0	10	2	0.5	0.875	0.189004	334.069	0.125	0.5	High O unsaturated	-2.91687	LVOC	317.748	183.051	135921	0.0930415	332452	0.118947	695084	0.189997
257.067	C11H14O7	O7	CHO	11	14	7	0	0	5	-2	0.636364	1.27273	-0.101336	258.074	0	0.2	High O unsaturated	0.123259	SVOC	303.193	180.323	377443	0.258371	640941	0.229321	692488	0.189288
355.067	C15H16O10	O10	CHO	15	16	10	0	0	8	-2	0.666667	1.06667	-0.227844	356.074	0.266667	0.3	High O unsaturated	-4.34007	ELVOC	330.675	184.044	103576	0.0709005	316413	0.113209	691336	0.188973
179.035	C9H8O4	O4	CHO	9	8	4	0	0	6	2	0.444444	0.888889	-0.0145223	180.042	0	0.571429	Aromatic	3.15137	IVOC	259.309	175.593	500158	0.342373	688450	0.246319	653904	0.178741
285.04	C15H10O6	O6	CHO	15	10	6	0	0	11	5	0.4	0.666667	0.124719	286.048	0.133333	0.666667	Aromatic	-1.1781	LVOC	295.784	179.973	210595	0.144158	424519	0.151888	686027	0.187522
299.056	C16H12O6	O6	CHO	16	12	6	0	0	11	5	0.375	0.75	0.0471483	300.063	0	0.615385	Aromatic	-1.3906	LVOC	300.182	181.405	180105	0.123287	404536	0.144738	685256	0.187311
245.045	C13H10O5	O5	CHO	13	10	5	0	0	9	4	0.384615	0.769231	-0.228529	246.053	0	0.619048	Aromatic	0.645259	SVOC	283.06	178.786	313864	0.214849	543160	0.194336	684669	0.18715
269.067	C12H14O7	O7	CHO	12	14	7	0	0	6	-1	0.583333	1.16667	-0.219834	270.074	0	0.294118	High O unsaturated	-0.254337	SVOC	304.98	180.849	291992	0.199877	524110	0.18752	683800	0.186913
353.052	C15H14O10	O10	CHO	15	14	10	0	0	9	-1	0.666667	0.933333	0.305621	354.059	0.4	0.4	High O unsaturated	-4.61747	ELVOC	328.445	183.209	76758.1	0.0525432	242400	0.0867278	682028	0.186429
303.072	C12H16O9	O9	CHO	12	16	9	0	0	5	-4	0.75	1.33333	0.194343	304.079	0.166667	0.0666667	High O unsaturated	-2.20659	LVOC	321.238	182.214	223529	0.153012	517413	0.185124	678571	0.185484
233.046	C12H10O5	O5	CHO	12	10	5	0	0	8	3	0.416667	0.833333	-0.0203823	234.053	0	0.578947	Aromatic	1.12867	SVOC	281.341	178.356	446327	0.305524	677503	0.242402	645329	0.176397
301.035	C15H10O7	O7	CHO	15	10	7	0	0	11	4	0.466667	0.666667	-0.0529838	302.043	0.266667	0.652174	Aromatic	-2.07622	LVOC	303.944	180.332	140233	0.0959937	318610	0.113995	677246	0.185122
305.03	C14H10O8	O8	CHO	14	10	8	0	0	10	2	0.571429	0.714286	-0.158017	306.038	0.428571	0.6	Aromatic	-2.64066	LVOC	310.322	180.246	100935	0.0690927	302429	0.108205	675482	0.184639
277.072	C14H14O6	O6	CHO	14	14	6	0	0	8	2	0.428571	1	0.0539571	278.079	-0.142857	0.454545	Low O unsaturated	-0.146794	SVOC	299.727	181.479	295032	0.201958	500771	0.17917	674641	0.184409
275.056	C14H12O6	O6	CHO	14	12	6	0	0	9	3	0.428571	0.857143	0.0836193	276.063	0	0.545455	Aromatic	-0.424194	SVOC	297.382	180.575	292344	0.200118	540742	0.193471	672329	0.183778
299.077	C13H16O8	O8	CHO	13	16	8	0	0	6	-2	0.615385	1.23077	0.18206	300.085	0	0.222222	High O unsaturated	-1.4227	LVOC	315.976	182.462	292452	0.200192	520393	0.18619	671193	0.183467
279.015	C12H8O8	O8	CHO	12	8	8	0	0	9	1	0.666667	0.666667	0.0557318	280.022	0.666667	0.625	Aromatic	-2.17035	LVOC	306.128	178.273	88766.3	0.0607631	354568	0.12686	663123	0.181261
367.067	C16H16O10	O10	CHO	16	16	10	0	0	9	-1	0.625	1	0.389166	368.075	0.25	0.363636	High O unsaturated	-4.6995	ELVOC	331.626	184.519	83657.5	0.057266	280444	0.10034	662531	0.181099
203.035	C11H8O4	O4	CHO	11	8	4	0	0	8	4	0.363636	0.727273	-0.0458049	204.042	0	0.666667	Aromatic	2.18577	SVOC	263.742	176.484	482590	0.330347	661957	0.23684	525633	0.143679
197.009	C8H6O6	O6	CHO	8	6	6	0	0	6	0	0.75	0.75	-0.0598957	198.016	0.75	0.6	Aromatic	1.16078	SVOC	283.489	174.652	254717	0.174361	604235	0.216188	659268	0.180207
311.077	C14H16O8	O8	CHO	14	16	8	0	0	7	-1	0.571429	1.14286	0.154303	312.085	0	0.3	High O unsaturated	-1.80846	LVOC	317.471	182.966	210124	0.143836	429585	0.1537	658074	0.179881
203.02	C7H8O7	O7	CHO	7	8	7	0	0	4	-3	1	1.14286	-0.144567	204.027	0.857143	0.142857	High O unsaturated	0.449726	SVOC	293.781	175.441	198324	0.135759	645666	0.231011	656969	0.179579
191.035	C10H8O4	O4	CHO	10	8	4	0	0	7	3	0.4	0.8	-0.0492056	192.042	0	0.625	Aromatic	2.67864	IVOC	261.636	176.052	481137	0.329352	654071	0.234018	523967	0.143224
277.056	C10H14O9	O9	CHO	10	14	9	0	0	4	-5	0.9	1.4	-0.21945	278.064	0.4	0	Aliphatic	-1.93408	LVOC	317.024	180.311	152377	0.104306	363706	0.130129	650492	0.177809
227.056	C10H12O6	O6	CHO	10	12	6	0	0	5	-1	0.6	1.2	-0.0147541	228.063	0	0.285714	High O unsaturated	1.29773	SVOC	290.328	178.653	465354	0.318548	645223	0.230853	546455	0.14937
273.04	C14H10O6	O6	CHO	14	10	6	0	0	10	4	0.428571	0.714286	-0.0228904	274.048	0.142857	0.636364	Aromatic	-0.701594	LVOC	294.609	179.572	208074	0.142433	437630	0.156578	645039	0.176318
177.019	C9H6O4	O4	CHO	9	6	4	0	0	7	3	0.444444	0.666667	-0.0429332	178.027	0.222222	0.714286	Condensed aromatic	2.87397	IVOC	257.68	174.466	475483	0.325482	643318	0.230171	497925	0.136105
317.067	C16H14O7	O7	CHO	16	14	7	0	0	10	3	0.4375	0.875	0.179615	318.074	0	0.52	Aromatic	-1.97881	LVOC	310.889	182.712	181003	0.123902	367158	0.131365	641802	0.175433
267.015	C11H8O8	O8	CHO	11	8	8	0	0	8	0	0.727273	0.727273	0.0589855	268.022	0.727273	0.571429	Aromatic	-1.83597	LVOC	305.677	177.816	104269	0.0713754	410055	0.146713	637296	0.174201
291.036	C10H12O10	O10	CHO	10	12	10	0	0	5	-5	1	1.2	0.138127	292.043	0.8	0	Aliphatic	-3.49427	LVOC	322.419	179.753	65516	0.0448476	291773	0.104393	634002	0.173301
287.056	C15H12O6	O6	CHO	15	12	6	0	0	10	4	0.4	0.8	0.0477259	288.063	0	0.583333	Aromatic	-0.900703	LVOC	298.829	180.999	212519	0.145476	449731	0.160908	629734	0.172134
247.061	C13H12O5	O5	CHO	13	12	5	0	0	8	3	0.384615	0.923077	-0.338782	248.068	-0.153846	0.52381	Aromatic	0.922659	SVOC	285.541	179.768	300219	0.205509	517443	0.185135	629480	0.172065
335.041	C15H12O9	O9	CHO	15	12	9	0	0	10	1	0.6	0.8	0.266684	336.048	0.4	0.52381	Aromatic	-3.80427	ELVOC	320.293	181.999	91774.9	0.0628226	281945	0.100877	627748	0.171592
261.025	C9H10O9	O9	CHO	9	10	9	0	0	5	-4	1	1.11111	-0.278326	262.032	0.888889	0.111111	High O unsaturated	-2.27207	LVOC	313.601	178.051	64236.9	0.043972	370452	0.132543	625648	0.171018
319.082	C16H16O7	O7	CHO	16	16	7	0	0	9	2	0.4375	1	0.073492	320.09	-0.125	0.44	Low O unsaturated	-1.70141	LVOC	313.305	183.569	183170	0.125385	338096	0.120967	625552	0.170991
225.04	C10H10O6	O6	CHO	10	10	6	0	0	6	0	0.6	1	-0.000888729	226.048	0.2	0.428571	High O unsaturated	1.02033	SVOC	288.88	177.753	326853	0.22374	499812	0.178827	623032	0.170302
319.067	C12H16O10	O10	CHO	12	16	10	0	0	5	-5	0.833333	1.33333	0.159684	320.074	0.333333	0	Aliphatic	-3.40598	LVOC	327.389	182.479	136899	0.0937112	353815	0.12659	620591	0.169635
315.051	C16H12O7	O7	CHO	16	12	7	0	0	11	4	0.4375	0.75	0.023647	316.058	0.125	0.6	Aromatic	-2.25621	LVOC	308.1	181.771	149444	0.102299	308599	0.110413	613874	0.167799
363.072	C17H16O9	O9	CHO	17	16	9	0	0	10	1	0.529412	0.941176	0.109758	364.079	0.117647	0.44	High O unsaturated	-4.05095	ELVOC	327.263	184.67	111711	0.0764693	268357	0.0960148	613278	0.167636
269.046	C15H10O5	O5	CHO	15	10	5	0	0	11	6	0.333333	0.666667	-0.117824	270.053	0	0.68	Condensed aromatic	-0.363674	SVOC	286.132	179.586	241054	0.165008	415127	0.148527	611903	0.16726
327.051	C17H12O7	O7	CHO	17	12	7	0	0	12	5	0.411765	0.705882	0.142638	328.058	0.117647	0.62963	Aromatic	-2.72747	LVOC	309.143	182.168	109578	0.075009	274487	0.098208	610622	0.16691
273.025	C10H10O9	O9	CHO	10	10	9	0	0	6	-3	0.9	1	0.0813112	274.033	0.8	0.272727	High O unsaturated	-2.48888	LVOC	314.353	178.609	72903.5	0.0499046	322377	0.115342	609907	0.166715
309.025	C13H10O9	O9	CHO	13	10	9	0	0	9	0	0.692308	0.769231	-0.36696	310.032	0.615385	0.529412	Aromatic	-3.36131	LVOC	316.226	180.102	75287.1	0.0515362	272446	0.0974777	604738	0.165302
265.072	C13H14O6	O6	CHO	13	14	6	0	0	7	1	0.461538	1.07692	-0.0803556	266.079	-0.153846	0.4	Low O unsaturated	0.31421	SVOC	297.926	181.013	287334	0.196688	455517	0.162978	603322	0.164915
287.077	C12H16O8	O8	CHO	12	16	8	0	0	5	-3	0.666667	1.33333	0.0656618	288.085	0	0.125	High O unsaturated	-1.06075	LVOC	314.362	181.932	358564	0.245448	602278	0.215488	586474	0.16031
307.082	C15H16O7	O7	CHO	15	16	7	0	0	8	1	0.466667	1.06667	0.155496	308.09	-0.133333	0.391304	Low O unsaturated	-1.24402	LVOC	311.794	183.117	212266	0.145302	392496	0.14043	599392	0.163841
289.072	C15H14O6	O6	CHO	15	14	6	0	0	9	3	0.4	0.933333	-0.0354583	290.079	-0.133333	0.5	Low O unsaturated	-0.623303	LVOC	301.403	181.923	231812	0.158682	418085	0.149586	596661	0.163094
345.062	C17H14O8	O8	CHO	17	14	8	0	0	11	3	0.470588	0.823529	-0.0576709	346.069	0.117647	0.538462	Aromatic	-3.35738	LVOC	318.796	183.475	94304.5	0.0645541	260301	0.0931326	593611	0.16226
297.04	C16H10O6	O6	CHO	16	10	6	0	0	12	6	0.375	0.625	-0.110759	298.048	0.125	0.692308	Condensed aromatic	-1.668	LVOC	296.883	180.356	146873	0.100539	313532	0.112178	590533	0.161419
163.025	C5H8O6	O6	CHO	5	8	6	0	0	2	-4	1.2	1.6	-0.0683945	164.032	0.8	0	Aliphatic	2.10447	SVOC	278.65	173.931	248986	0.170438	573174	0.205074	586947	0.160439
213.04	C9H10O6	O6	CHO	9	10	6	0	0	5	-1	0.666667	1.11111	-0.0382556	214.048	0.222222	0.333333	High O unsaturated	1.38637	SVOC	287.087	177.231	363094	0.248549	586894	0.209984	563046	0.153905
347.077	C17H16O8	O8	CHO	17	16	8	0	0	10	2	0.470588	0.941176	-0.135993	348.084	0	0.461538	Low O unsaturated	-3.07998	LVOC	321.387	184.347	136286	0.0932919	299956	0.107321	583143	0.159399
205.051	C11H10O4	O4	CHO	11	10	4	0	0	7	3	0.363636	0.909091	-0.0290172	206.058	-0.181818	0.555556	Aromatic	2.46317	SVOC	265.973	177.534	415889	0.284688	582691	0.20848	511599	0.139843
235.061	C12H12O5	O5	CHO	12	12	5	0	0	7	2	0.416667	1	-0.205691	236.068	-0.166667	0.473684	Low O unsaturated	1.40607	SVOC	283.507	179.313	349017	0.238912	508167	0.181816	580743	0.158743
161.009	C5H6O6	O6	CHO	5	6	6	0	0	3	-3	1.2	1.2	-0.063661	162.016	1.2	0	Aliphatic	1.82707	SVOC	280.675	172.996	144954	0.0992253	334281	0.119601	580574	0.158697
313.035	C16H10O7	O7	CHO	16	10	7	0	0	12	5	0.4375	0.625	-0.0768284	314.043	0.25	0.68	Condensed aromatic	-2.53361	LVOC	304.8	180.725	108542	0.0742998	278448	0.0996254	579656	0.158446
275.02	C13H8O7	O7	CHO	13	8	7	0	0	10	3	0.538462	0.615385	-0.142353	276.027	0.461538	0.684211	Condensed aromatic	-1.48875	LVOC	299.009	178.389	113560	0.0777349	322749	0.115476	577305	0.157803
271.082	C12H16O7	O7	CHO	12	16	7	0	0	5	-2	0.583333	1.33333	0.0250846	272.09	-0.166667	0.176471	High O unsaturated	0.0230628	SVOC	306.567	181.631	391301	0.267857	575662	0.205965	509307	0.139216
311.056	C17H12O6	O6	CHO	17	12	6	0	0	12	6	0.352941	0.705882	-0.234845	312.063	0	0.642857	Aromatic	-1.89214	LVOC	301.453	181.793	135494	0.0927498	277001	0.0991075	574955	0.157161
231.03	C12H8O5	O5	CHO	12	8	5	0	0	9	4	0.416667	0.666667	-0.0240229	232.037	0.166667	0.684211	Condensed aromatic	0.851267	SVOC	278.69	177.279	346532	0.237211	569905	0.203905	517924	0.141572
331.046	C16H12O8	O8	CHO	16	12	8	0	0	11	3	0.5	0.75	0.296787	332.053	0.25	0.583333	Aromatic	-3.19427	LVOC	314.958	182.111	85049.7	0.058219	261456	0.0935458	568542	0.155408
345.046	C13H14O11	O11	CHO	13	14	11	0	0	7	-4	0.846154	1.07692	0.350967	346.054	0.615385	0.2	High O unsaturated	-5.17647	ELVOC	332.128	182.488	54520.7	0.037321	244283	0.0874013	566747	0.154917
365.052	C16H14O10	O10	CHO	16	14	10	0	0	10	0	0.625	0.875	0.279139	366.059	0.375	0.454545	High O unsaturated	-4.9769	ELVOC	329.209	183.666	70462.7	0.0482338	238900	0.0854754	566561	0.154866
357.083	C15H18O10	O10	CHO	15	18	10	0	0	7	-3	0.666667	1.2	-0.0351459	358.09	0.133333	0.2	High O unsaturated	-4.06267	ELVOC	332.642	184.811	141408	0.0967979	327790	0.117279	566533	0.154859
379.067	C17H16O10	O10	CHO	17	16	10	0	0	10	0	0.588235	0.941176	-0.0311291	380.074	0.235294	0.416667	High O unsaturated	-5.07852	ELVOC	332.519	184.974	91059.7	0.062333	242769	0.0868597	566003	0.154714
295.082	C14H16O7	O7	CHO	14	16	7	0	0	7	0	0.5	1.14286	-0.181305	296.09	-0.142857	0.333333	High O unsaturated	-0.802474	LVOC	310.178	182.645	208892	0.142993	381135	0.136366	565109	0.154469
215.092	C10H16O5	O5	CHO	10	16	5	0	0	3	-2	0.5	1.6	-0.0460267	216.1	-0.6	0.0666667	High O unsaturated	2.87153	IVOC	281.158	179.877	564805	0.386626	440919	0.157755	267493	0.0731178
297.025	C12H10O9	O9	CHO	12	10	9	0	0	8	-1	0.75	0.833333	0.0883763	298.032	0.666667	0.466667	High O unsaturated	-3.03879	LVOC	315.655	179.631	54500.6	0.0373072	249570	0.089293	562501	0.153757
209.046	C10H10O5	O5	CHO	10	10	5	0	0	6	1	0.5	1	-0.0727114	210.053	0	0.466667	High O unsaturated	2.03933	SVOC	277.426	177.424	363826	0.249049	550812	0.197074	561439	0.153466
223.061	C11H12O5	O5	CHO	11	12	5	0	0	6	1	0.454545	1.09091	-0.0398994	224.068	-0.181818	0.411765	Low O unsaturated	1.87193	SVOC	281.296	178.833	368833	0.252477	515645	0.184491	559356	0.152897
233.067	C9H14O7	O7	CHO	9	14	7	0	0	3	-4	0.777778	1.55556	-0.0332523	234.074	0	0	Aliphatic	0.786126	SVOC	299.072	179.174	327369	0.224093	557187	0.199355	326407	0.0892216
341.088	C15H18O9	O9	CHO	15	18	9	0	0	7	-2	0.6	1.2	-0.0773994	342.095	0	0.238095	High O unsaturated	-2.97207	LVOC	327.065	184.523	164873	0.112861	351790	0.125866	556342	0.152073
271.025	C14H8O6	O6	CHO	14	8	6	0	0	11	5	0.428571	0.571429	0.0582972	272.032	0.285714	0.727273	Condensed aromatic	-0.978994	LVOC	291.215	178.441	151701	0.103844	372999	0.133455	552404	0.150997
353.088	C16H18O9	O9	CHO	16	18	9	0	0	8	-1	0.5625	1.125	-0.353595	354.095	0	0.304348	High O unsaturated	-3.36389	LVOC	328.345	185.007	123293	0.0843979	292562	0.104675	552318	0.150973
329.067	C17H14O7	O7	CHO	17	14	7	0	0	11	4	0.411765	0.823529	-0.0753647	330.074	0	0.555556	Aromatic	-2.45007	LVOC	312.134	183.128	149360	0.102241	292182	0.104539	552005	0.150888
347.062	C13H16O11	O11	CHO	13	16	11	0	0	6	-5	0.846154	1.23077	0.0112372	348.069	0.461538	0.0666667	High O unsaturated	-4.89907	ELVOC	333.946	183.285	74117.4	0.0507355	272544	0.0975127	549494	0.150201
339.036	C14H12O10	O10	CHO	14	12	10	0	0	9	-1	0.714286	0.857143	-0.228147	340.043	0.571429	0.444444	High O unsaturated	-4.55747	ELVOC	325.283	181.833	50204.5	0.0343665	217773	0.0779165	548715	0.149988
301.072	C16H14O6	O6	CHO	16	14	6	0	0	10	4	0.375	0.875	-0.15943	302.079	-0.125	0.538462	Aromatic	-1.1132	LVOC	302.971	182.348	199683	0.136689	336816	0.120509	546265	0.149319
249.004	C11H6O7	O7	CHO	11	6	7	0	0	9	2	0.636364	0.545455	-0.279112	250.011	0.727273	0.733333	Condensed aromatic	-0.986341	LVOC	294.722	176.323	93154	0.0637666	383435	0.137188	546085	0.149269
257.046	C14H10O5	O5	CHO	14	10	5	0	0	10	5	0.357143	0.714286	-0.00525199	258.053	0	0.652174	Aromatic	0.147073	SVOC	284.651	179.195	249599	0.170857	489368	0.17509	545078	0.148994
329.088	C14H18O9	O9	CHO	14	18	9	0	0	6	-3	0.642857	1.28571	0.121852	330.095	0	0.157895	High O unsaturated	-2.60043	LVOC	325.696	184.017	192413	0.131712	399994	0.143113	544585	0.148859
217.051	C12H10O4	O4	CHO	12	10	4	0	0	8	4	0.333333	0.833333	-0.0490669	218.058	-0.166667	0.6	Aromatic	1.95393	SVOC	268.314	177.974	381699	0.261284	543646	0.19451	469476	0.128329
263.041	C9H12O9	O9	CHO	9	12	9	0	0	4	-5	1	1.33333	-0.0861083	264.048	0.666667	0	Aliphatic	-1.99467	LVOC	314.633	178.917	99276.2	0.0679574	312675	0.111871	542825	0.148378
271.061	C15H12O5	O5	CHO	15	12	5	0	0	10	5	0.333333	0.8	-0.0933369	272.068	-0.133333	0.6	Aromatic	-0.086274	SVOC	289.177	180.614	240836	0.164859	414832	0.148422	541467	0.148007
231.087	C10H16O6	O6	CHO	10	16	6	0	0	3	-3	0.6	1.6	-0.0313734	232.095	-0.4	0	Aliphatic	1.85253	SVOC	292.612	180.202	517510	0.35425	541199	0.193634	318869	0.087161
359.062	C14H16O11	O11	CHO	14	16	11	0	0	7	-4	0.785714	1.14286	0.0623848	360.069	0.428571	0.176471	High O unsaturated	-5.17633	ELVOC	334.865	183.813	74852	0.0512383	266165	0.0952304	540031	0.147615
259.082	C11H16O7	O7	CHO	11	16	7	0	0	4	-3	0.636364	1.45455	0.00231587	260.09	-0.181818	0.0666667	High O unsaturated	0.400659	SVOC	304.528	181.082	379702	0.259917	540002	0.193206	385510	0.105377
233.009	C11H6O6	O6	CHO	11	6	6	0	0	9	3	0.545455	0.545455	-0.268444	234.016	0.545455	0.75	Condensed aromatic	0.0691613	SVOC	285.396	176.002	184419	0.12624	433906	0.155246	536410	0.146625
333.046	C12H14O11	O11	CHO	12	14	11	0	0	6	-5	0.916667	1.16667	-0.27879	334.054	0.666667	0.0769231	High O unsaturated	-4.92935	ELVOC	331.366	181.953	41231.8	0.0282244	240996	0.0862256	535327	0.146329
327.036	C13H12O10	O10	CHO	13	12	10	0	0	8	-2	0.769231	0.923077	-0.319537	328.043	0.615385	0.375	High O unsaturated	-4.24498	ELVOC	324.653	181.353	42334	0.0289789	207617	0.0742828	534954	0.146227
343.046	C17H12O8	O8	CHO	17	12	8	0	0	12	4	0.470588	0.705882	-0.172134	344.053	0.235294	0.615385	Aromatic	-3.63478	ELVOC	315.804	182.517	70899.3	0.0485326	227517	0.0814029	534908	0.146214
365.088	C17H18O9	O9	CHO	17	18	9	0	0	9	0	0.529412	1.05882	-0.27377	366.095	0	0.36	High O unsaturated	-3.77355	ELVOC	329.548	185.47	118866	0.0813673	260057	0.0930451	532633	0.145592
283.061	C16H12O5	O5	CHO	16	12	5	0	0	11	6	0.3125	0.75	-0.064827	284.068	-0.125	0.62963	Aromatic	-0.607788	LVOC	290.817	181.01	186295	0.127524	361197	0.129232	532523	0.145562
238.987	C6H8O8S	O8S	CHOS	6	8	8	0	1	3	-5	1.33333	1.33333	-0.0585807	239.994	0.333333	0	Aliphatic	-2.27741	LVOC	NA	NA	NA	NA	NA	NA	530828	0.145099
349.093	C17H18O8	O8	CHO	17	18	8	0	0	9	1	0.470588	1.05882	-0.144661	350.1	-0.117647	0.384615	Low O unsaturated	-2.80258	LVOC	323.673	185.148	141175	0.0966382	270998	0.0969597	530419	0.144987
153.019	C7H6O4	O4	CHO	7	6	4	0	0	5	1	0.571429	0.857143	-0.0483599	154.027	0.285714	0.6	Aromatic	3.73704	IVOC	253.691	173.541	442257	0.302737	529280	0.18937	480597	0.131369
239.056	C11H12O6	O6	CHO	11	12	6	0	0	6	0	0.545455	1.09091	-0.0052289	240.063	0	0.375	High O unsaturated	0.901361	SVOC	292.326	179.173	310332	0.212431	511837	0.183129	528730	0.144525
369.083	C16H18O10	O10	CHO	16	18	10	0	0	8	-2	0.625	1.125	0.0120569	370.09	0.125	0.272727	High O unsaturated	-4.4221	ELVOC	333.757	185.302	105043	0.0719051	252216	0.0902398	528465	0.144453
243.087	C11H16O6	O6	CHO	11	16	6	0	0	4	-2	0.545455	1.45455	-0.0215972	244.095	-0.363636	0.125	High O unsaturated	1.45616	SVOC	295.202	180.77	520524	0.356314	527837	0.188853	317469	0.0867785
283.082	C13H16O7	O7	CHO	13	16	7	0	0	6	-1	0.538462	1.23077	-0.289668	284.09	-0.153846	0.263158	High O unsaturated	-0.379154	SVOC	308.442	182.151	274243	0.187727	437676	0.156595	525825	0.143731
259.025	C13H8O6	O6	CHO	13	8	6	0	0	10	4	0.461538	0.615385	0.0142843	260.032	0.307692	0.7	Condensed aromatic	-0.51799	SVOC	290.311	178.048	183371	0.125523	415718	0.148739	524157	0.143275
313.093	C14H18O8	O8	CHO	14	18	8	0	0	6	-2	0.571429	1.28571	0.014213	314.1	-0.142857	0.2	High O unsaturated	-1.53106	LVOC	319.262	183.719	251823	0.17238	427506	0.152956	523900	0.143205
215.02	C8H8O7	O7	CHO	8	8	7	0	0	5	-2	0.875	1	-0.197656	216.027	0.75	0.333333	High O unsaturated	0.226886	SVOC	294.909	176.012	159451	0.109149	432263	0.154658	521960	0.142675
190.999	C9H4O5	O5	CHO	9	4	5	0	0	8	3	0.555556	0.444444	-0.0337699	192.006	0.666667	0.846154	Condensed aromatic	1.62635	SVOC	269.976	173.501	253717	0.173677	521289	0.186511	389634	0.106504
285.025	C11H10O9	O9	CHO	11	10	9	0	0	7	-2	0.818182	0.909091	-0.207701	286.032	0.727273	0.384615	High O unsaturated	-2.74639	LVOC	315.033	179.134	58338	0.0399341	217924	0.0779707	518388	0.141699
199.061	C9H12O5	O5	CHO	9	12	5	0	0	4	-1	0.555556	1.33333	-0.0519941	200.068	-0.222222	0.230769	High O unsaturated	2.73595	IVOC	276.197	177.787	483568	0.331016	516740	0.184883	321001	0.0877438
383.062	C16H16O11	O11	CHO	16	16	11	0	0	9	-2	0.6875	1	-0.298124	384.069	0.375	0.333333	High O unsaturated	-5.80785	ELVOC	336.521	184.799	58720	0.0401955	202054	0.0722923	516484	0.141178
147.03	C5H8O5	O5	CHO	5	8	5	0	0	2	-3	1	1.6	-0.0924982	148.037	0.4	0	Aliphatic	3.44893	IVOC	264.115	173.68	368868	0.252501	463167	0.165715	513434	0.140344
189.019	C10H6O4	O4	CHO	10	6	4	0	0	8	4	0.4	0.6	-0.0439109	190.027	0.2	0.75	Condensed aromatic	2.40124	SVOC	259.352	174.886	371303	0.254168	510170	0.182533	387573	0.105941
325.093	C15H18O8	O8	CHO	15	18	8	0	0	7	-1	0.533333	1.2	0.0965878	326.1	-0.133333	0.272727	High O unsaturated	-1.93751	LVOC	320.83	184.217	199789	0.136761	344796	0.123364	508958	0.139121
229.051	C13H10O4	O4	CHO	13	10	4	0	0	9	5	0.307692	0.769231	-0.0305609	230.058	-0.153846	0.636364	Aromatic	1.43121	SVOC	270.468	178.391	338226	0.231526	506485	0.181214	438935	0.119981
219.015	C7H8O8	O8	CHO	7	8	8	0	0	4	-4	1.14286	1.14286	-0.222131	220.022	1.14286	0	Aliphatic	-0.884314	LVOC	303.331	175.688	64248.2	0.0439798	333630	0.119369	506159	0.138356
371.062	C15H16O11	O11	CHO	15	16	11	0	0	8	-3	0.733333	1.06667	-0.269227	372.069	0.4	0.263158	High O unsaturated	-5.48024	ELVOC	335.721	184.317	60270	0.0412565	238628	0.085378	505275	0.138114
337.093	C16H18O8	O8	CHO	16	18	8	0	0	8	0	0.5	1.125	0.129786	338.1	-0.125	0.333333	High O unsaturated	-2.36207	LVOC	322.296	184.692	151815	0.103922	302769	0.108327	505224	0.1381
351.036	C15H12O10	O10	CHO	15	12	10	0	0	10	0	0.666667	0.8	-0.29242	352.043	0.533333	0.5	High O unsaturated	-4.89487	ELVOC	325.871	182.291	45306.3	0.0310135	200671	0.0717978	504700	0.137957
252.999	C10H6O8	O8	CHO	10	6	8	0	0	8	0	0.8	0.6	-0.00691702	254.006	1	0.666667	Aromatic	-1.81114	LVOC	302.898	176.175	55469.6	0.0379706	395414	0.141474	504382	0.13787
259.061	C14H12O5	O5	CHO	14	12	5	0	0	9	4	0.357143	0.857143	-0.125067	260.068	-0.142857	0.565217	Aromatic	0.424473	SVOC	287.424	180.201	265253	0.181573	477119	0.170707	503816	0.137715
361.057	C17H14O9	O9	CHO	17	14	9	0	0	11	2	0.529412	0.823529	0.0925063	362.064	0.235294	0.52	Aromatic	-4.32835	ELVOC	324.671	183.8	73376.8	0.0502286	213805	0.0764966	502543	0.137367
193.051	C10H10O4	O4	CHO	10	10	4	0	0	6	2	0.4	1	-0.0318569	194.058	-0.2	0.5	Low O unsaturated	2.95604	IVOC	263.408	177.069	378338	0.258983	500560	0.179094	417953	0.114245
317.03	C15H10O8	O8	CHO	15	10	8	0	0	11	3	0.533333	0.666667	0.0831151	318.038	0.4	0.636364	Aromatic	-3.04711	LVOC	311.013	180.666	75234.8	0.0515004	234411	0.0838694	499942	0.136656
369.046	C15H14O11	O11	CHO	15	14	11	0	0	9	-2	0.733333	0.933333	-0.301182	370.053	0.533333	0.368421	High O unsaturated	-5.75764	ELVOC	333.491	183.483	NA	NA	162958	0.0583044	496612	0.135746
157.014	C6H6O5	O5	CHO	6	6	5	0	0	4	-1	0.833333	1	-0.0283414	158.022	0.666667	0.428571	High O unsaturated	2.93827	IVOC	268.042	173.319	318525	0.21804	496244	0.17755	358398	0.097966
345.083	C14H18O10	O10	CHO	14	18	10	0	0	6	-4	0.714286	1.28571	-0.0333253	346.09	0.142857	0.111111	High O unsaturated	-3.72527	ELVOC	331.451	184.298	163855	0.112163	350179	0.12529	496083	0.135602
287.02	C14H8O7	O7	CHO	14	8	7	0	0	11	4	0.5	0.571429	0.0423316	288.027	0.428571	0.714286	Condensed aromatic	-1.91207	LVOC	299.635	178.792	100553	0.0688317	258973	0.0926574	492678	0.134671
343.082	C18H16O7	O7	CHO	18	16	7	0	0	11	4	0.388889	0.888889	0.268011	344.09	-0.111111	0.517241	Aromatic	-2.65614	LVOC	316.064	184.417	127755	0.0874518	280646	0.100412	490580	0.134097
329.03	C16H10O8	O8	CHO	16	10	8	0	0	12	4	0.5	0.625	-0.262894	330.037	0.375	0.666667	Aromatic	-3.47167	LVOC	311.659	181.067	46957.9	0.032144	199168	0.07126	490333	0.13403
313.072	C17H14O6	O6	CHO	17	14	6	0	0	11	5	0.352941	0.823529	-0.1201	314.079	-0.117647	0.571429	Aromatic	-1.61474	LVOC	304.444	182.755	141471	0.096841	296964	0.10625	487422	0.133234
341.067	C18H14O7	O7	CHO	18	14	7	0	0	12	5	0.388889	0.777778	-0.139122	342.074	0	0.586207	Aromatic	-2.93354	LVOC	313.308	183.527	93263.5	0.0638416	232981	0.0833578	487202	0.133174
255.03	C14H8O5	O5	CHO	14	8	5	0	0	11	6	0.357143	0.571429	-0.0309768	256.037	0.142857	0.73913	Condensed aromatic	-0.130327	SVOC	281.257	178.062	193298	0.132318	376594	0.134741	486666	0.133028
373.078	C15H18O11	O11	CHO	15	18	11	0	0	7	-4	0.733333	1.2	-0.313474	374.085	0.266667	0.157895	High O unsaturated	-5.20284	ELVOC	337.688	185.083	95872.8	0.0656277	276105	0.0987868	486435	0.132964
375.072	C18H16O9	O9	CHO	18	16	9	0	0	11	2	0.5	0.888889	0.378461	376.08	0.111111	0.481481	High O unsaturated	-4.47647	ELVOC	328.251	185.101	94793.8	0.0648891	207116	0.0741034	486433	0.132964
227.02	C9H8O7	O7	CHO	9	8	7	0	0	6	-1	0.777778	0.888889	-0.128183	228.027	0.666667	0.454545	High O unsaturated	-0.046074	SVOC	295.903	176.546	121533	0.0831929	289305	0.10351	485691	0.132761
331.082	C17H16O7	O7	CHO	17	16	7	0	0	10	3	0.411765	0.941176	0.186358	332.09	-0.117647	0.481481	Low O unsaturated	-2.17267	LVOC	314.726	184.002	156121	0.106869	287449	0.102846	484461	0.132425
381.083	C17H18O10	O10	CHO	17	18	10	0	0	9	-1	0.588235	1.05882	-0.253488	382.09	0.117647	0.333333	High O unsaturated	-4.80112	ELVOC	334.804	185.773	99734.5	0.0682712	243768	0.0872171	483809	0.132247
321.025	C14H10O9	O9	CHO	14	10	9	0	0	10	1	0.642857	0.714286	-0.216961	322.032	0.571429	0.578947	Aromatic	-3.71003	ELVOC	316.755	180.551	53823.2	0.0368436	203975	0.0729798	482267	0.131825
281.045	C16H10O5	O5	CHO	16	10	5	0	0	12	7	0.3125	0.625	-0.267216	282.053	0	0.703704	Condensed aromatic	-0.885188	LVOC	287.518	179.959	147309	0.100837	318151	0.11383	478771	0.13087
377.088	C18H18O9	O9	CHO	18	18	9	0	0	10	1	0.5	1	0.312792	378.095	0	0.407407	High O unsaturated	-4.19907	ELVOC	330.682	185.915	118458	0.0810876	240905	0.0861929	478417	0.130773
347.041	C16H12O9	O9	CHO	16	12	9	0	0	11	2	0.5625	0.75	0.131253	348.048	0.375	0.565217	Aromatic	-4.19609	ELVOC	321.008	182.43	70486.1	0.0482498	193251	0.0691428	476533	0.130258
293.051	C10H14O10	O10	CHO	10	14	10	0	0	4	-6	1	1.4	0.027299	294.059	0.6	0	Aliphatic	-3.21687	LVOC	323.643	180.558	49854.9	0.0341271	158643	0.0567605	475974	0.130105
178.999	C8H4O5	O5	CHO	8	4	5	0	0	7	2	0.625	0.5	-0.0340785	180.006	0.75	0.818182	Condensed aromatic	2.01411	SVOC	269.779	173.087	283990	0.194399	475044	0.169965	441065	0.120563
215.035	C12H8O4	O4	CHO	12	8	4	0	0	9	5	0.333333	0.666667	-0.0465041	216.042	0	0.7	Condensed aromatic	1.67653	SVOC	265.664	176.894	316257	0.216487	474216	0.169669	376107	0.102807
241.072	C11H14O6	O6	CHO	11	14	6	0	0	5	-1	0.545455	1.27273	-0.0190815	242.079	-0.181818	0.25	High O unsaturated	1.17876	SVOC	293.867	180.009	362206	0.24794	473949	0.169573	440167	0.120317
255.015	C10H8O8	O8	CHO	10	8	8	0	0	7	-1	0.8	0.8	-0.230575	256.022	0.8	0.5	High O unsaturated	-1.53374	LVOC	305.182	177.333	58205.7	0.0398435	245111	0.0876977	472448	0.129141
163.04	C9H8O3	O3	CHO	9	8	3	0	0	6	3	0.333333	0.888889	-0.0162537	164.047	-0.222222	0.6	Aromatic	3.99413	IVOC	240.497	175.226	398886	0.273049	468858	0.167751	331047	0.09049
163.004	C8H4O4	O4	CHO	8	4	4	0	0	7	3	0.5	0.5	-0.0230056	164.011	0.5	0.833333	Condensed aromatic	3.04413	IVOC	254.547	172.756	402352	0.275422	468332	0.167564	321073	0.0877637
149.009	C4H6O6	O6	CHO	4	6	6	0	0	2	-4	1.5	1.5	-0.0281862	150.016	1.5	0	Aliphatic	1.88849	SVOC	279.339	172.353	133819	0.0916032	468234	0.167528	315204	0.0861594
283.025	C15H8O6	O6	CHO	15	8	6	0	0	12	6	0.4	0.533333	-0.143804	284.032	0.266667	0.75	Condensed aromatic	-1.4555	LVOC	292.057	178.816	111664	0.0764376	260136	0.0930733	467687	0.12784
301.093	C13H18O8	O8	CHO	13	18	8	0	0	5	-3	0.615385	1.38462	0.0254074	302.1	-0.153846	0.111111	High O unsaturated	-1.1453	LVOC	317.579	183.197	297112	0.203382	466228	0.166811	465877	0.127345
243.03	C13H8O5	O5	CHO	13	8	5	0	0	10	5	0.384615	0.615385	-0.00205736	244.037	0.153846	0.714286	Condensed aromatic	0.367859	SVOC	280.023	177.68	253567	0.173574	465070	0.166396	466003	0.127379
291.087	C15H16O6	O6	CHO	15	16	6	0	0	8	2	0.4	1.06667	0.0750634	292.095	-0.266667	0.416667	Low O unsaturated	-0.345903	SVOC	303.633	182.764	234211	0.160324	349464	0.125034	465995	0.127377
357.046	C14H14O11	O11	CHO	14	14	11	0	0	8	-3	0.785714	1	-0.209497	358.054	0.571429	0.294118	High O unsaturated	-5.45373	ELVOC	332.834	182.997	NA	NA	197342	0.0706065	465219	0.127165
241.051	C14H10O4	O4	CHO	14	10	4	0	0	10	6	0.285714	0.714286	-0.00850444	242.058	-0.142857	0.666667	Aromatic	0.897259	SVOC	272.463	178.788	272802	0.186741	463794	0.16594	455645	0.124548
361.078	C14H18O11	O11	CHO	14	18	11	0	0	6	-5	0.785714	1.28571	-0.163261	362.085	0.285714	0.0588235	High O unsaturated	-4.89893	ELVOC	336.656	184.563	97735.8	0.066903	244551	0.0874971	463517	0.1267
171.03	C7H8O5	O5	CHO	7	8	5	0	0	4	-1	0.714286	1.14286	-0.0496989	172.037	0.285714	0.333333	High O unsaturated	2.91733	IVOC	269.717	174.889	343251	0.234965	460913	0.164909	390695	0.106794
335.062	C12H16O11	O11	CHO	12	16	11	0	0	5	-6	0.916667	1.33333	-0.202948	336.069	0.5	0	Aliphatic	-4.65195	ELVOC	332.953	182.729	65542.7	0.0448659	186862	0.0668568	460301	0.125821
275.077	C11H16O8	O8	CHO	11	16	8	0	0	4	-4	0.727273	1.45455	0.00381711	276.085	0	0	Aliphatic	-0.726369	LVOC	312.607	181.374	273195	0.18701	459440	0.164382	449591	0.122893
359.077	C18H16O8	O8	CHO	18	16	8	0	0	11	3	0.444444	0.888889	0.0626606	360.085	0	0.5	Low O unsaturated	-3.53458	ELVOC	322.54	184.77	106299	0.0727646	233559	0.0835646	459087	0.125489
321.098	C16H18O7	O7	CHO	16	18	7	0	0	8	1	0.4375	1.125	-0.299441	322.105	-0.25	0.36	Low O unsaturated	-1.42401	LVOC	315.437	184.356	168849	0.115582	289928	0.103733	456870	0.124883
257.103	C12H18O6	O6	CHO	12	18	6	0	0	4	-2	0.5	1.5	0.00739003	258.11	-0.5	0.111111	High O unsaturated	1.31193	SVOC	298.967	182.026	456582	0.312543	431701	0.154457	239884	0.0655709
357.062	C18H14O8	O8	CHO	18	14	8	0	0	12	4	0.444444	0.777778	0.292807	358.069	0.111111	0.571429	Aromatic	-3.81198	ELVOC	319.783	183.882	78545.8	0.0537669	217454	0.0778022	454108	0.124128
393.083	C18H18O10	O10	CHO	18	18	10	0	0	10	0	0.555556	1	0.0552047	394.09	0.111111	0.384615	High O unsaturated	-5.19762	ELVOC	335.792	186.224	80782.8	0.0552982	198584	0.071051	453994	0.124097
295.061	C17H12O5	O5	CHO	17	12	5	0	0	12	7	0.294118	0.705882	0.130142	296.069	-0.117647	0.655172	Aromatic	-1.1386	LVOC	292.357	181.389	143083	0.0979442	299278	0.107078	453868	0.124062
245.009	C12H6O6	O6	CHO	12	6	6	0	0	10	4	0.5	0.5	-0.234685	246.016	0.5	0.777778	Condensed aromatic	-0.352474	SVOC	285.917	176.402	146932	0.100579	327540	0.11719	452790	0.123768
303.087	C16H16O6	O6	CHO	16	16	6	0	0	9	3	0.375	1	-0.203902	304.095	-0.25	0.461538	Low O unsaturated	-0.835801	LVOC	305.388	183.206	176880	0.121079	318964	0.114121	452753	0.123757
173.009	C6H6O6	O6	CHO	6	6	6	0	0	4	-2	1	1	-0.0950817	174.016	1	0.333333	High O unsaturated	1.67193	SVOC	281.767	173.59	159598	0.109249	386532	0.138296	450451	0.123128
299.008	C8H12O10S	O10S	CHOS	8	12	10	0	1	3	-7	1.25	1.5	-0.00836098	300.015	0.25	0	Aliphatic	-4.60395	ELVOC	NA	NA	NA	NA	NA	NA	447900	0.122431
291.015	C13H8O8	O8	CHO	13	8	8	0	0	10	2	0.615385	0.615385	-0.00859063	292.022	0.615385	0.666667	Aromatic	-2.5323	LVOC	306.544	178.707	55244.4	0.0378164	233961	0.0837082	447411	0.122297
175.04	C10H8O3	O3	CHO	10	8	3	0	0	7	4	0.3	0.8	-0.0451325	176.047	-0.2	0.647059	Aromatic	3.46946	IVOC	243.563	175.669	390333	0.267194	447360	0.16006	303959	0.0830856
285.098	C13H18O7	O7	CHO	13	18	7	0	0	5	-2	0.538462	1.38462	0.0582256	286.105	-0.307692	0.157895	High O unsaturated	-0.101754	SVOC	310.044	182.887	329780	0.225744	447168	0.159991	372090	0.101709
213.077	C10H14O5	O5	CHO	10	14	5	0	0	4	-1	0.5	1.4	-0.0727437	214.084	-0.4	0.2	High O unsaturated	2.59413	IVOC	280.098	179.138	446415	0.305584	440956	0.157769	260316	0.0711561
325.072	C18H14O6	O6	CHO	18	14	6	0	0	12	6	0.333333	0.777778	-0.292551	326.079	-0.111111	0.6	Aromatic	-2.12647	LVOC	305.833	183.146	113607	0.0777674	253570	0.0907244	446035	0.121921
299.02	C15H8O7	O7	CHO	15	8	7	0	0	12	5	0.466667	0.533333	0.10919	300.027	0.4	0.73913	Condensed aromatic	-2.35362	LVOC	300.217	179.177	83754.4	0.0573323	235993	0.0844355	444694	0.121555
231.015	C8H8O8	O8	CHO	8	8	8	0	0	5	-3	1	1	-0.0761856	232.022	1	0.25	High O unsaturated	-1.04987	LVOC	304.024	176.273	75317.4	0.0515569	335627	0.120083	441566	0.1207
395.062	C17H16O11	O11	CHO	17	16	11	0	0	10	-1	0.647059	0.941176	-0.126816	396.069	0.352941	0.391304	High O unsaturated	-6.15662	ELVOC	337.273	185.26	51347.9	0.0351491	183716	0.0657311	438952	0.119985
222.988	C9H4O7	O7	CHO	9	4	7	0	0	8	1	0.777778	0.444444	-0.0235438	223.996	1.11111	0.818182	Condensed aromatic	-0.600874	LVOC	291.979	174.121	84713.2	0.0579887	397112	0.142082	437816	0.119675
385.078	C16H18O11	O11	CHO	16	18	11	0	0	8	-3	0.6875	1.125	0.153995	386.085	0.25	0.238095	High O unsaturated	-5.53045	ELVOC	338.653	185.581	74155.3	0.0507614	218465	0.0781641	437568	0.119607
321.046	C11H14O11	O11	CHO	11	14	11	0	0	5	-6	1	1.27273	0.231742	322.054	0.727273	0	Aliphatic	-4.71647	ELVOC	330.538	181.389	NA	NA	179018	0.0640505	437388	0.119558
255.087	C12H16O6	O6	CHO	12	16	6	0	0	5	-1	0.5	1.33333	0.00725242	256.095	-0.333333	0.222222	High O unsaturated	1.03453	SVOC	297.568	181.307	358138	0.245156	436350	0.156121	331990	0.0907477
273.077	C15H14O5	O5	CHO	15	14	5	0	0	9	4	0.333333	0.933333	-0.0640845	274.084	-0.266667	0.52	Aromatic	0.191126	SVOC	291.751	181.54	221882	0.151885	364368	0.130366	436048	0.119191
219.066	C12H12O4	O4	CHO	12	12	4	0	0	7	3	0.333333	1	-0.0362904	220.074	-0.333333	0.5	Low O unsaturated	2.23133	SVOC	270.48	178.932	316259	0.216489	435547	0.155833	329503	0.0900677
279.087	C14H16O6	O6	CHO	14	16	6	0	0	7	1	0.428571	1.14286	0.00770368	280.095	-0.285714	0.363636	Low O unsaturated	0.130606	SVOC	301.758	182.301	240270	0.164472	376233	0.134612	434097	0.118658
199.025	C8H8O6	O6	CHO	8	8	6	0	0	5	-1	0.75	1	-0.0409497	200.032	0.5	0.4	High O unsaturated	1.43818	SVOC	284.386	175.732	217078	0.148596	376747	0.134796	433479	0.118489
167.035	C8H8O4	O4	CHO	8	8	4	0	0	5	1	0.5	1	-0.0179603	168.042	0	0.5	High O unsaturated	3.59893	IVOC	256.707	175.104	347108	0.237606	433406	0.155067	353873	0.0967294
361.093	C18H18O8	O8	CHO	18	18	8	0	0	10	2	0.444444	1	0.0649417	362.1	-0.111111	0.428571	Low O unsaturated	-3.25718	LVOC	324.971	185.586	118207	0.080916	243804	0.0872299	431016	0.117816
253.072	C12H14O6	O6	CHO	12	14	6	0	0	6	0	0.5	1.16667	-0.0306237	254.079	-0.166667	0.333333	High O unsaturated	0.757126	SVOC	295.981	180.524	296999	0.203304	426748	0.152685	430563	0.117692
273.098	C12H18O7	O7	CHO	12	18	7	0	0	4	-3	0.583333	1.5	0.0280119	274.105	-0.333333	0.0588235	High O unsaturated	0.300463	SVOC	307.966	182.349	356801	0.244241	430181	0.153914	293726	0.0802884
249.025	C8H10O9	O9	CHO	8	10	9	0	0	4	-5	1.125	1.25	-0.169461	250.032	1	0	Aliphatic	-2.10314	LVOC	312.76	177.457	51035.2	0.034935	227909	0.0815431	428697	0.117182
288.987	C6H10O11S	O11S	CHOS	6	10	11	0	1	2	-9	1.83333	1.66667	0.0648818	289.994	1	9	Aromatic	-5.6591	ELVOC	NA	NA	NA	NA	NA	NA	424316	0.115985
285.077	C16H14O5	O5	CHO	16	14	5	0	0	10	5	0.3125	0.875	-0.194334	286.084	-0.25	0.555556	Aromatic	-0.330388	SVOC	293.606	181.955	182233	0.124744	317059	0.11344	423893	0.115869
261.077	C14H14O5	O5	CHO	14	14	5	0	0	8	3	0.357143	1	-0.0128315	262.084	-0.285714	0.478261	Low O unsaturated	0.701873	SVOC	289.768	181.106	244645	0.167467	382983	0.137027	422756	0.115558
226.987	C5H8O8S	O8S	CHOS	5	8	8	0	1	2	-6	1.6	1.6	-0.0191641	227.994	0.4	0	Aliphatic	-2.03623	LVOC	NA	NA	NA	NA	NA	NA	421005	0.115079
235.046	C8H12O8	O8	CHO	8	12	8	0	0	3	-5	1	1.5	-0.19911	236.053	0.5	0	Aliphatic	-0.495074	SVOC	305.288	178.049	122528	0.083874	221011	0.0790749	420375	0.114907
197.046	C9H10O5	O5	CHO	9	10	5	0	0	5	0	0.555556	1.11111	-0.0256286	198.053	0	0.384615	High O unsaturated	2.45855	SVOC	275.164	176.916	327620	0.224265	420323	0.150386	342546	0.093633
377.051	C17H14O10	O10	CHO	17	14	10	0	0	11	1	0.588235	0.823529	-0.392917	378.059	0.352941	0.5	High O unsaturated	-5.35592	ELVOC	329.927	184.105	48339.8	0.03309	169668	0.060705	418601	0.114422
183.03	C8H8O5	O5	CHO	8	8	5	0	0	5	0	0.625	1	-0.0691144	184.037	0.25	0.454545	High O unsaturated	2.56891	IVOC	271.94	175.43	283535	0.194088	417813	0.149488	369038	0.100874
381.046	C16H14O11	O11	CHO	16	14	11	0	0	10	-1	0.6875	0.875	0.0868661	382.054	0.5	0.428571	High O unsaturated	-6.08525	ELVOC	334.105	183.947	NA	NA	153257	0.0548334	415812	0.11366
333.083	C13H18O10	O10	CHO	13	18	10	0	0	5	-5	0.769231	1.38462	-0.23973	334.09	0.153846	0	Aliphatic	-3.41278	LVOC	330.17	183.76	126690	0.086723	302374	0.108186	413655	0.11307
211.061	C10H12O5	O5	CHO	10	12	5	0	0	5	0	0.5	1.2	-0.037193	212.068	-0.2	0.333333	High O unsaturated	2.31673	SVOC	278.874	178.326	353224	0.241792	413601	0.147981	314678	0.0860155
291.072	C11H16O9	O9	CHO	11	16	9	0	0	4	-5	0.818182	1.45455	-0.104441	292.079	0.181818	0	Aliphatic	-1.91419	LVOC	319.733	181.646	131702	0.0901538	264138	0.0945052	412826	0.112844
231.066	C13H12O4	O4	CHO	13	12	4	0	0	8	4	0.307692	0.923077	-0.0636181	232.074	-0.307692	0.545455	Aromatic	1.70861	SVOC	272.949	179.375	277013	0.189623	412804	0.147696	390279	0.106681
317.088	C13H18O9	O9	CHO	13	18	9	0	0	5	-4	0.692308	1.38462	-0.220128	318.095	0	0.0588235	High O unsaturated	-2.25171	LVOC	324.225	183.487	209285	0.143262	384010	0.137394	412522	0.112761
339.051	C18H12O7	O7	CHO	18	12	7	0	0	13	6	0.388889	0.666667	0.0507298	340.058	0.111111	0.655172	Aromatic	-3.21094	LVOC	310.126	182.55	76010.6	0.0520315	182019	0.0651241	411726	0.112543
297.098	C14H18O7	O7	CHO	14	18	7	0	0	6	-1	0.5	1.28571	-0.234434	298.105	-0.285714	0.238095	High O unsaturated	-0.525074	LVOC	311.969	183.4	271050	0.185542	376840	0.134829	411542	0.112493
397.078	C17H18O11	O11	CHO	17	18	11	0	0	9	-2	0.647059	1.05882	0.16294	398.085	0.235294	0.304348	High O unsaturated	-5.87922	ELVOC	339.559	186.058	66879.4	0.0457809	186833	0.0668465	410034	0.112081
325.035	C17H10O7	O7	CHO	17	10	7	0	0	13	6	0.411765	0.588235	-0.366114	326.043	0.235294	0.703704	Condensed aromatic	-3.00487	LVOC	305.605	181.101	75619.5	0.0517637	181133	0.0648072	409585	0.111958
327.087	C18H16O6	O6	CHO	18	16	6	0	0	11	5	0.333333	0.888889	0.0547254	328.095	-0.222222	0.533333	Aromatic	-1.84907	LVOC	308.589	184.038	108573	0.0743213	219880	0.0786704	408605	0.11169
391.067	C18H16O10	O10	CHO	18	16	10	0	0	11	1	0.555556	0.888889	-0.0163655	392.074	0.222222	0.461538	High O unsaturated	-5.47502	ELVOC	333.361	185.411	63597.8	0.0435346	183138	0.0655245	408400	0.111634
309.04	C17H10O6	O6	CHO	17	10	6	0	0	13	7	0.352941	0.588235	0.0630985	310.048	0.117647	0.714286	Condensed aromatic	-2.16954	LVOC	297.915	180.724	97193.2	0.0665315	243668	0.0871812	408028	0.111532
243.066	C14H12O4	O4	CHO	14	12	4	0	0	9	5	0.285714	0.857143	-0.0335299	244.074	-0.285714	0.583333	Aromatic	1.17466	SVOC	275.236	179.796	267282	0.182962	407523	0.145807	364139	0.0995356
333.098	C17H18O7	O7	CHO	17	18	7	0	0	9	2	0.411765	1.05882	-0.19859	334.105	-0.235294	0.407407	Low O unsaturated	-1.89527	LVOC	317.011	184.804	149062	0.102037	251824	0.0900993	407291	0.111331
355.104	C16H20O9	O9	CHO	16	20	9	0	0	7	-2	0.5625	1.25	0.197266	356.111	-0.125	0.217391	High O unsaturated	-3.08649	LVOC	330.252	185.733	155932	0.10674	270696	0.0968518	405795	0.110922
373.056	C18H14O9	O9	CHO	18	14	9	0	0	12	3	0.5	0.777778	-0.182412	374.064	0.222222	0.555556	Aromatic	-4.75387	ELVOC	325.495	184.214	45510.2	0.0311531	154756	0.0553697	405177	0.110753
253.051	C15H10O4	O4	CHO	15	10	4	0	0	11	7	0.266667	0.666667	-0.0883222	254.058	-0.133333	0.692308	Condensed aromatic	0.353852	SVOC	274.319	179.167	231934	0.158766	374227	0.133894	403838	0.110387
249.077	C13H14O5	O5	CHO	13	14	5	0	0	7	2	0.384615	1.07692	-0.34668	250.084	-0.307692	0.428571	Low O unsaturated	1.20006	SVOC	287.638	180.651	249000	0.170448	370964	0.132726	403580	0.110317
359.041	C17H12O9	O9	CHO	17	12	9	0	0	12	3	0.529412	0.705882	-0.301358	360.048	0.352941	0.6	Aromatic	-4.60575	ELVOC	321.68	182.843	42174.1	0.0288694	147201	0.0526667	403095	0.110184
367.103	C17H20O9	O9	CHO	17	20	9	0	0	8	-1	0.529412	1.17647	-0.380274	368.111	-0.117647	0.28	High O unsaturated	-3.49615	LVOC	331.593	186.211	131653	0.0901205	230135	0.0823393	399956	0.109326
227.035	C13H8O4	O4	CHO	13	8	4	0	0	10	6	0.307692	0.615385	-0.036338	228.042	0	0.727273	Condensed aromatic	1.15381	SVOC	267.432	177.282	277499	0.189956	399362	0.142887	342223	0.0935449
309.098	C15H18O7	O7	CHO	15	18	7	0	0	7	0	0.466667	1.2	-0.281949	310.105	-0.266667	0.304348	Low O unsaturated	-0.966619	LVOC	313.761	183.889	204047	0.139676	303621	0.108632	399136	0.109102
161.046	C6H10O5	O5	CHO	6	10	5	0	0	2	-3	0.833333	1.66667	-0.0791701	162.053	0	0	Aliphatic	3.49307	IVOC	266.459	175.171	321959	0.22039	341102	0.122042	395972	0.108237
189.056	C11H10O3	O3	CHO	11	10	3	0	0	7	4	0.272727	0.909091	-0.048134	190.063	-0.363636	0.578947	Aromatic	3.20804	IVOC	248.568	177.138	319094	0.218429	394969	0.141315	277564	0.0758706
323.056	C18H12O6	O6	CHO	18	12	6	0	0	13	7	0.333333	0.666667	0.0235253	324.063	0	0.666667	Aromatic	-2.40387	LVOC	302.651	182.166	92532.2	0.063341	209559	0.0749777	394593	0.10786
201.056	C12H10O3	O3	CHO	12	10	3	0	0	8	5	0.25	0.833333	-0.052473	202.063	-0.333333	0.619048	Aromatic	2.65789	IVOC	251.52	177.564	322090	0.22048	394531	0.141158	286927	0.0784301
217.014	C11H6O5	O5	CHO	11	6	5	0	0	9	4	0.454545	0.545455	-0.0458495	218.022	0.363636	0.764706	Condensed aromatic	1.03973	SVOC	274.365	175.656	222058	0.152005	392179	0.140317	347970	0.0951159
161.024	C9H6O3	O3	CHO	9	6	3	0	0	7	4	0.333333	0.666667	-0.0155256	162.032	0	0.733333	Condensed aromatic	3.71673	IVOC	238.868	174.097	334316	0.228849	391335	0.140015	256496	0.0701117
298.057	C12H13NO8	NO8	CHNO	12	13	8	1	0	7	-1	0.666667	1.08333	-0.226299	299.064	-0.166667	0.285714	High O unsaturated	-2.18399	LVOC	NA	NA	94099	0.0644135	228983	0.0819274	390710	0.106799
221.03	C7H10O8	O8	CHO	7	10	8	0	0	3	-5	1.14286	1.42857	-0.0104058	222.038	0.857143	0	Aliphatic	-0.606914	LVOC	303.382	176.59	84345.8	0.0577371	263623	0.094321	389678	0.106516
295.01	C12H8O9	O9	CHO	12	8	9	0	0	9	0	0.75	0.666667	0.171011	296.017	0.833333	0.6	Aromatic	-3.31619	LVOC	313.004	178.561	NA	NA	209378	0.0749129	388398	0.106167
315.087	C17H16O6	O6	CHO	17	16	6	0	0	10	4	0.352941	0.941176	0.0317372	316.095	-0.235294	0.5	Low O unsaturated	-1.33734	LVOC	307.035	183.631	143118	0.0979681	276122	0.098793	387328	0.105874
268.046	C11H11NO7	NO7	CHNO	11	11	7	1	0	7	0	0.636364	1	-0.0904695	269.054	-0.181818	0.384615	High O unsaturated	-1.15871	LVOC	NA	NA	102631	0.0702539	240651	0.0861021	386661	0.105692
371.099	C16H20O10	O10	CHO	16	20	10	0	0	7	-3	0.625	1.25	0.35085	372.106	0	0.181818	High O unsaturated	-4.1447	ELVOC	335.664	186.028	121914	0.0834536	270059	0.0966236	386392	0.105618
133.014	C4H6O5	O5	CHO	4	6	5	0	0	2	-3	1.25	1.5	-0.0101493	134.022	1	0	Aliphatic	3.31799	IVOC	263.812	172.122	279709	0.191469	386337	0.138227	369225	0.100926
297.077	C17H14O5	O5	CHO	17	14	5	0	0	11	6	0.294118	0.823529	-0.0339979	298.084	-0.235294	0.586207	Aromatic	-0.861201	LVOC	295.349	182.353	148018	0.101323	286828	0.102624	385647	0.105414
276.051	C13H11NO6	NO6	CHNO	13	11	6	1	0	9	3	0.461538	0.846154	-0.0807821	277.059	-0.307692	0.555556	Aromatic	-1.21782	LVOC	NA	NA	127340	0.0871678	278707	0.0997179	384965	0.105228
353.067	C19H14O7	O7	CHO	19	14	7	0	0	13	6	0.368421	0.736842	0.209592	354.074	0	0.612903	Aromatic	-3.4278	LVOC	314.419	183.912	76127	0.0521111	168979	0.0604586	382367	0.104518
280.046	C12H11NO7	NO7	CHNO	12	11	7	1	0	8	1	0.583333	0.916667	0.0833791	281.054	-0.166667	0.466667	High O unsaturated	-1.53897	LVOC	NA	NA	121325	0.0830504	267422	0.0956804	381777	0.104357
292.046	C13H11NO7	NO7	CHNO	13	11	7	1	0	9	2	0.538462	0.846154	-0.198256	293.053	-0.153846	0.529412	Aromatic	-1.92259	LVOC	NA	NA	104325	0.0714132	259203	0.0927395	380517	0.104012
303.015	C14H8O8	O8	CHO	14	8	8	0	0	11	3	0.571429	0.571429	-0.171279	304.022	0.571429	0.7	Condensed aromatic	-2.91806	LVOC	306.928	179.12	52642.2	0.0360351	159461	0.0570531	380325	0.10396
177.056	C10H10O3	O3	CHO	10	10	3	0	0	6	3	0.3	1	-0.0319109	178.063	-0.4	0.529412	Aromatic	3.74686	IVOC	245.335	176.688	311107	0.212962	380151	0.136013	250093	0.0683617
273.004	C13H6O7	O7	CHO	13	6	7	0	0	11	4	0.538462	0.461538	-0.0461532	274.011	0.615385	0.789474	Condensed aromatic	-1.76615	LVOC	295.094	177.126	68385.2	0.0468117	221873	0.0793833	378735	0.103525
355.046	C18H12O8	O8	CHO	18	12	8	0	0	13	5	0.444444	0.666667	0.128012	356.053	0.222222	0.642857	Aromatic	-4.08938	ELVOC	316.602	182.906	50464.5	0.0345444	172973	0.0618877	378245	0.103391
255.066	C15H12O4	O4	CHO	15	12	4	0	0	10	6	0.266667	0.8	0.0180345	256.074	-0.266667	0.615385	Aromatic	0.631252	SVOC	277.364	180.198	229579	0.157153	377524	0.135073	368770	0.100801
351.109	C17H20O8	O8	CHO	17	20	8	0	0	8	0	0.470588	1.17647	0.0639403	352.116	-0.235294	0.307692	Low O unsaturated	-2.52518	LVOC	325.717	185.89	135356	0.0926553	239977	0.0858606	376128	0.102813
207.066	C11H12O4	O4	CHO	11	12	4	0	0	6	2	0.363636	1.09091	-0.0229395	208.074	-0.363636	0.444444	Low O unsaturated	2.74057	IVOC	267.796	178.465	282838	0.193611	375578	0.134377	356198	0.0973647
395.098	C18H20O10	O10	CHO	18	20	10	0	0	9	-1	0.555556	1.11111	0.127184	396.106	0	0.307692	High O unsaturated	-4.92022	ELVOC	337.966	186.977	86207.6	0.0590116	196578	0.0703333	374975	0.102498
339.109	C16H20O8	O8	CHO	16	20	8	0	0	7	-1	0.5	1.25	0.0659081	340.116	-0.25	0.25	High O unsaturated	-2.08467	LVOC	324.202	185.42	155959	0.106758	254825	0.0911732	374840	0.102461
294.062	C13H13NO7	NO7	CHNO	13	13	7	1	0	8	1	0.538462	1	-0.15626	295.069	-0.307692	0.411765	High O unsaturated	-1.84739	LVOC	NA	NA	127950	0.0875853	260515	0.0932091	374642	0.102406
306.062	C14H13NO7	NO7	CHNO	14	13	7	1	0	9	2	0.5	0.928571	0.0937719	307.069	-0.285714	0.473684	High O unsaturated	-2.2339	LVOC	NA	NA	123983	0.0848699	238557	0.0853526	374267	0.102304
345.098	C18H18O7	O7	CHO	18	18	7	0	0	10	3	0.388889	1	0.21704	346.105	-0.222222	0.448276	Low O unsaturated	-2.37874	LVOC	318.496	185.235	130698	0.0894663	231157	0.0827053	372317	0.101771
375.057	C14H16O12	O12	CHO	14	16	12	0	0	7	-5	0.857143	1.14286	-0.105584	376.064	0.571429	0.125	High O unsaturated	-6.39317	ELVOC	339.617	184.065	NA	NA	163322	0.0584345	371648	0.101588
177.04	C6H10O6	O6	CHO	6	10	6	0	0	2	-4	1	1.66667	-0.0646745	178.048	0.333333	0	Aliphatic	2.22673	SVOC	280.183	175.439	214862	0.147079	327845	0.117299	370832	0.101365
229.014	C12H6O5	O5	CHO	12	6	5	0	0	10	5	0.416667	0.5	-0.0620049	230.022	0.333333	0.789474	Condensed aromatic	0.573867	SVOC	275.273	176.043	185140	0.126734	370765	0.132655	355132	0.0970734
355.082	C19H16O7	O7	CHO	19	16	7	0	0	12	5	0.368421	0.842105	0.0749122	356.09	-0.105263	0.548387	Aromatic	-3.1504	LVOC	317.331	184.817	80309.7	0.0549743	188457	0.0674277	370673	0.101321
409.078	C18H18O11	O11	CHO	18	18	11	0	0	10	-1	0.611111	1	-0.0284787	410.085	0.222222	0.36	High O unsaturated	-6.24695	ELVOC	340.414	186.516	43464.8	0.0297529	163375	0.0584536	370319	0.101225
343.103	C15H20O9	O9	CHO	15	20	9	0	0	6	-3	0.6	1.33333	-0.360241	344.111	-0.133333	0.142857	High O unsaturated	-2.69467	LVOC	328.824	185.235	186258	0.127499	314502	0.112525	370050	0.101151
341.03	C17H10O8	O8	CHO	17	10	8	0	0	13	5	0.470588	0.588235	-0.3573	342.037	0.352941	0.692308	Condensed aromatic	-3.91218	ELVOC	312.266	181.452	NA	NA	146392	0.0523772	369607	0.10103
307.061	C18H12O5	O5	CHO	18	12	5	0	0	13	8	0.277778	0.666667	-0.345371	308.068	-0.111111	0.677419	Condensed aromatic	-1.6775	LVOC	293.81	181.753	101618	0.0695604	215136	0.0769732	369096	0.10089
305.103	C16H18O6	O6	CHO	16	18	6	0	0	8	2	0.375	1.125	-0.195672	306.11	-0.375	0.384615	Low O unsaturated	-0.558401	LVOC	307.519	183.995	165362	0.113195	238595	0.0853663	368612	0.100758
327.108	C15H20O8	O8	CHO	15	20	8	0	0	6	-2	0.533333	1.33333	-0.272234	328.116	-0.266667	0.181818	High O unsaturated	-1.66011	LVOC	322.589	184.93	208110	0.142457	307612	0.11006	368268	0.100664
187.04	C11H8O3	O3	CHO	11	8	3	0	0	8	5	0.272727	0.727273	-0.0328807	188.047	-0.181818	0.684211	Condensed aromatic	2.93064	IVOC	246.337	176.086	367997	0.251904	362889	0.129837	294377	0.0804663
185.082	C9H14O4	O4	CHO	9	14	4	0	0	3	-1	0.444444	1.55556	-0.0416032	186.089	-0.666667	0.142857	Low O unsaturated	3.98357	IVOC	262.478	178.235	365688	0.250324	280971	0.100528	160934	0.0439903
383.098	C17H20O10	O10	CHO	17	20	10	0	0	8	-2	0.588235	1.17647	0.163013	384.106	0	0.25	High O unsaturated	-4.52372	ELVOC	336.849	186.512	107073	0.0732944	217245	0.0777277	365554	0.0999222
210.992	C5H8O7S	O7S	CHOS	5	8	7	0	1	2	-5	1.4	1.6	-0.0386271	211.999	-4.44e-16	0	Aliphatic	-0.816047	LVOC	NA	NA	NA	NA	NA	NA	365474	0.0999002
296.041	C12H11NO8	NO8	CHNO	12	11	8	1	0	8	0	0.666667	0.916667	0.0692471	297.048	0	0.428571	High O unsaturated	-2.25919	LVOC	NA	NA	72503.8	0.0496309	197404	0.0706286	363841	0.099454
267.066	C16H12O4	O4	CHO	16	12	4	0	0	11	7	0.25	0.75	-0.0438093	268.074	-0.25	0.642857	Aromatic	0.079806	SVOC	279.355	180.583	197391	0.13512	306535	0.109674	363054	0.099239
264.051	C12H11NO6	NO6	CHNO	12	11	6	1	0	8	2	0.5	0.916667	-0.211512	265.059	-0.333333	0.5	High O unsaturated	-0.828632	LVOC	NA	NA	161319	0.110428	273164	0.0977347	362785	0.0991652
267.087	C13H16O6	O6	CHO	13	16	6	0	0	6	0	0.461538	1.23077	0.022839	268.095	-0.307692	0.3	Low O unsaturated	0.59161	SVOC	299.743	181.816	263164	0.180143	362772	0.129795	340955	0.0931982
319.031	C11H12O11	O11	CHO	11	12	11	0	0	6	-5	1	1.09091	0.230856	320.038	0.909091	0.0909091	High O unsaturated	-4.99387	ELVOC	328.997	180.559	NA	NA	158528	0.0567195	361804	0.0988971
308.041	C13H11NO8	NO8	CHNO	13	11	8	1	0	9	1	0.615385	0.846154	0.162803	309.049	5.55e-17	0.5	High O unsaturated	-2.63731	LVOC	NA	NA	69007.6	0.0472377	212639	0.0760795	361583	0.0988368
311.02	C16H8O7	O7	CHO	16	8	7	0	0	13	6	0.4375	0.5	-0.0493538	312.027	0.375	0.76	Condensed aromatic	-2.81101	LVOC	300.762	179.546	59384	0.0406501	161155	0.0576591	360976	0.0986709
159.03	C6H8O5	O5	CHO	6	8	5	0	0	3	-2	0.833333	1.33333	-0.0811168	160.037	0.333333	0.142857	High O unsaturated	3.21567	IVOC	267.15	174.308	267162	0.18288	323855	0.115871	360068	0.0984228
389.073	C15H18O12	O12	CHO	15	18	12	0	0	7	-5	0.8	1.2	0.0864877	390.08	0.4	0.111111	High O unsaturated	-6.38707	ELVOC	342.294	185.341	57596.9	0.0394267	192212	0.0687709	359069	0.0981495
222.992	C6H8O7S	O7S	CHOS	6	8	7	0	1	3	-4	1.16667	1.33333	-0.0654733	223.999	2.22e-16	0	Aliphatic	-1.08857	LVOC	NA	NA	NA	NA	NA	NA	358058	0.0978732
293.045	C17H10O5	O5	CHO	17	10	5	0	0	13	8	0.294118	0.588235	-0.188708	294.053	0	0.724138	Condensed aromatic	-1.416	LVOC	288.819	180.318	109573	0.0750059	234690	0.0839693	357267	0.0976569
363.109	C18H20O8	O8	CHO	18	20	8	0	0	9	1	0.444444	1.11111	0.19636	364.116	-0.222222	0.357143	Low O unsaturated	-2.97978	LVOC	327.146	186.342	123528	0.0845585	235416	0.084229	356825	0.0975362
272.992	C6H10O10S	O10S	CHOS	6	10	10	0	1	2	-8	1.66667	1.66667	-0.00952408	273.999	0.666667	0	Aliphatic	-4.41561	ELVOC	NA	NA	NA	NA	NA	NA	356411	0.0974229
389.088	C19H18O9	O9	CHO	19	18	9	0	0	11	2	0.473684	0.947368	-0.191345	390.095	0	0.448276	Low O unsaturated	-4.63876	ELVOC	331.755	186.343	63839.9	0.0437002	184395	0.0659744	356374	0.0974129
247.082	C10H16O7	O7	CHO	10	16	7	0	0	3	-4	0.7	1.6	-0.0568636	248.09	-0.2	0	Aliphatic	0.749291	SVOC	302.296	180.503	233136	0.159588	355115	0.127056	208689	0.0570439
309.077	C18H14O5	O5	CHO	18	14	5	0	0	12	7	0.277778	0.777778	0.0933425	310.084	-0.222222	0.612903	Aromatic	-1.4001	LVOC	296.992	182.735	120621	0.0825684	246098	0.0880508	354675	0.0969485
254.982	C6H8O9S	O9S	CHOS	6	8	9	0	1	3	-6	1.5	1.33333	-0.0819667	255.989	0.666667	0	Aliphatic	-3.48826	LVOC	NA	NA	NA	NA	NA	NA	354379	0.0968676
278.031	C12H9NO7	NO7	CHNO	12	9	7	1	0	9	2	0.583333	0.75	-0.158616	279.038	1.11e-16	0.6	Aromatic	-1.61417	LVOC	NA	NA	82918.8	0.0567603	240373	0.0860026	353843	0.0967212
151.04	C8H8O3	O3	CHO	8	8	3	0	0	5	2	0.375	1	-0.0483315	152.047	-0.25	0.538462	Aromatic	4.50076	IVOC	237.069	174.754	333686	0.228418	353700	0.12655	226865	0.0620123
373.093	C19H18O8	O8	CHO	19	18	8	0	0	11	3	0.421053	0.947368	0.21697	374.1	-0.105263	0.466667	Low O unsaturated	-3.72432	ELVOC	326.199	186.008	91762.5	0.0628141	191216	0.0684146	353468	0.0966187
237.077	C12H14O5	O5	CHO	12	14	5	0	0	6	1	0.416667	1.16667	-0.0253083	238.084	-0.333333	0.368421	Low O unsaturated	1.68347	SVOC	285.338	180.174	291493	0.199535	352674	0.126183	313074	0.0855771
330.998	C8H12O12S	O12S	CHOS	8	12	12	0	1	3	-9	1.5	1.5	0.16556	332.005	0.75	0	Aliphatic	-7.01506	ELVOC	NA	NA	NA	NA	NA	NA	352571	0.0963733
284.041	C11H11NO8	NO8	CHNO	11	11	8	1	0	7	-1	0.727273	1	0.0536894	285.048	0	0.333333	High O unsaturated	-1.88484	LVOC	NA	NA	68959.7	0.0472049	181691	0.0650066	352438	0.0963369
322.057	C14H13NO8	NO8	CHNO	14	13	8	1	0	9	1	0.571429	0.928571	0.13569	323.064	-0.142857	0.444444	High O unsaturated	-2.94349	LVOC	NA	NA	78939.9	0.0540367	213074	0.0762351	352272	0.0962916
181.051	C9H10O4	O4	CHO	9	10	4	0	0	5	1	0.444444	1.11111	-0.0342446	182.058	-0.222222	0.428571	Low O unsaturated	3.42877	IVOC	260.572	176.576	289863	0.19842	351753	0.125853	251074	0.0686298
299.114	C14H20O7	O7	CHO	14	20	7	0	0	5	-2	0.5	1.42857	0.0554973	300.121	-0.428571	0.142857	High O unsaturated	-0.247674	SVOC	313.572	184.099	299800	0.205222	351117	0.125625	282535	0.0772293
310.057	C13H13NO8	NO8	CHNO	13	13	8	1	0	8	0	0.615385	1	0.0420891	311.064	-0.153846	0.375	High O unsaturated	-2.56211	LVOC	NA	NA	87825	0.0601188	212251	0.0759409	350453	0.0957944
379.103	C18H20O9	O9	CHO	18	20	9	0	0	9	0	0.5	1.11111	0.084014	380.111	-0.111111	0.333333	High O unsaturated	-3.92167	ELVOC	332.857	186.669	104406	0.0714686	192489	0.0688703	349684	0.0955841
269.103	C13H18O6	O6	CHO	13	18	6	0	0	5	-1	0.461538	1.38462	0.0206241	270.11	-0.461538	0.2	Low O unsaturated	0.86901	SVOC	301.346	182.555	294960	0.201909	349595	0.125081	261565	0.0714974
363.036	C16H12O10	O10	CHO	16	12	10	0	0	11	1	0.625	0.75	-0.295288	364.043	0.5	0.545455	Aromatic	-5.2543	ELVOC	326.42	182.73	NA	NA	141811	0.0507382	348623	0.0952943
307.067	C11H16O10	O10	CHO	11	16	10	0	0	4	-6	0.909091	1.45455	-0.248968	308.074	0.363636	0	Aliphatic	-3.15413	LVOC	326.107	181.902	55847.3	0.0382291	138768	0.0496494	347521	0.0949929
387.072	C19H16O9	O9	CHO	19	16	9	0	0	12	3	0.473684	0.842105	0.29426	388.08	0.105263	0.517241	Aromatic	-4.91616	ELVOC	329.187	185.515	66320.9	0.0453986	158547	0.0567261	347438	0.0949704
189.004	C6H6O7	O7	CHO	6	6	7	0	0	4	-3	1.16667	1	-0.0555544	190.011	1.33333	0.2	High O unsaturated	0.33348	SVOC	293.371	173.841	63697.4	0.0436027	272884	0.0976345	347367	0.094951
387.057	C15H16O12	O12	CHO	15	16	12	0	0	8	-4	0.8	1.06667	0.326438	388.064	0.533333	0.222222	High O unsaturated	-6.66447	ELVOC	340.327	184.575	NA	NA	142915	0.0511333	347295	0.0949313
401.073	C16H18O12	O12	CHO	16	18	12	0	0	8	-4	0.75	1.125	-0.0999819	402.08	0.375	0.2	High O unsaturated	-6.68356	ELVOC	343.122	185.845	55632.1	0.0380818	158814	0.0568218	347141	0.0948891
275.092	C15H16O5	O5	CHO	15	16	5	0	0	8	3	0.333333	1.06667	-0.182666	276.1	-0.4	0.44	Low O unsaturated	0.468526	SVOC	293.982	182.383	188913	0.129316	301203	0.107767	346801	0.0947961
317.103	C17H18O6	O6	CHO	17	18	6	0	0	9	3	0.352941	1.05882	0.2064	318.11	-0.352941	0.428571	Low O unsaturated	-1.05994	LVOC	309.321	184.435	158200	0.108293	251378	0.08994	346258	0.0946478
369.062	C19H14O8	O8	CHO	19	14	8	0	0	13	5	0.421053	0.736842	0.0573075	370.069	0.105263	0.6	Aromatic	-4.27912	ELVOC	320.718	184.274	50206.5	0.0343678	142902	0.0511286	345929	0.0945579
334.057	C15H13NO8	NO8	CHNO	15	13	8	1	0	10	2	0.533333	0.866667	-0.122734	335.064	-0.133333	0.5	High O unsaturated	-3.32769	LVOC	NA	NA	75418.5	0.0516262	180770	0.0646771	345677	0.0944889
225.077	C11H14O5	O5	CHO	11	14	5	0	0	5	0	0.454545	1.27273	-0.00844156	226.084	-0.363636	0.294118	Low O unsaturated	2.14933	SVOC	282.837	179.67	293413	0.200849	345634	0.123663	242905	0.0663968
371.077	C19H16O8	O8	CHO	19	16	8	0	0	12	4	0.421053	0.842105	-0.0762644	372.084	0	0.533333	Aromatic	-4.00172	ELVOC	323.63	185.178	71695.3	0.0490775	159719	0.0571454	345004	0.094305
250.983	C10H4O8	O8	CHO	10	4	8	0	0	9	1	0.8	0.4	-0.00996082	251.991	1.2	0.833333	Condensed aromatic	-2.08854	LVOC	299.679	174.827	NA	NA	308181	0.110263	344782	0.0942443
336.073	C15H15NO8	NO8	CHNO	15	15	8	1	0	9	1	0.533333	1	0.134941	337.08	-0.266667	0.4	High O unsaturated	-3.25249	LVOC	NA	NA	84539.9	0.05787	199597	0.0714133	344083	0.0940533
220.025	C10H7NO5	NO5	CHNO	10	7	5	1	0	8	3	0.5	0.7	-0.0297693	221.032	-0.2	0.692308	Condensed aromatic	0.501435	SVOC	NA	NA	177556	0.121542	343483	0.122894	281169	0.076856
264.999	C11H6O8	O8	CHO	11	6	8	0	0	9	1	0.727273	0.545455	0.0175472	266.006	0.909091	0.714286	Condensed aromatic	-2.11337	LVOC	302.8	176.622	46275.4	0.0316768	204210	0.073064	343006	0.0937587
257.009	C13H6O6	O6	CHO	13	6	6	0	0	11	5	0.461538	0.461538	-0.206218	258.016	0.461538	0.8	Condensed aromatic	-0.79539	LVOC	286.396	176.782	82125.4	0.0562173	221527	0.0792597	342760	0.0936916
340.067	C14H15NO9	NO9	CHNO	14	15	9	1	0	8	-1	0.642857	1.07143	0.263036	341.075	-0.142857	0.294118	High O unsaturated	-3.58654	ELVOC	NA	NA	67486.2	0.0461963	168131	0.0601551	342758	0.0936912
234.041	C11H9NO5	NO5	CHNO	11	9	5	1	0	8	3	0.454545	0.818182	-0.00106819	235.048	-0.363636	0.6	Aromatic	0.187193	SVOC	NA	NA	199915	0.136847	342647	0.122595	295300	0.0807185
335.114	C17H20O7	O7	CHO	17	20	7	0	0	8	1	0.411765	1.17647	-0.184713	336.121	-0.352941	0.333333	Low O unsaturated	-1.61787	LVOC	319.056	185.548	124207	0.0850233	210602	0.0753507	342153	0.0935256
405.083	C19H18O10	O10	CHO	19	18	10	0	0	11	1	0.526316	0.947368	-0.01259	406.09	0.105263	0.428571	High O unsaturated	-5.60979	ELVOC	336.726	186.659	57836.7	0.0395909	155462	0.0556226	341970	0.0934756
171.066	C8H12O4	O4	CHO	8	12	4	0	0	3	-1	0.5	1.5	-0.0467655	172.074	-0.5	0.166667	High O unsaturated	4.15373	IVOC	257.971	176.891	300529	0.205721	341574	0.122211	140293	0.0383483
324.072	C14H15NO8	NO8	CHNO	14	15	8	1	0	8	0	0.571429	1.07143	-0.223253	325.08	-0.285714	0.333333	High O unsaturated	-2.86829	LVOC	NA	NA	94769.5	0.0648724	199398	0.0713423	341467	0.0933382
271.119	C13H20O6	O6	CHO	13	20	6	0	0	4	-2	0.461538	1.53846	0.0343023	272.126	-0.615385	0.1	Low O unsaturated	1.14641	SVOC	302.78	183.238	341358	0.23367	283060	0.101275	183286	0.0501003
261.004	C12H6O7	O7	CHO	12	6	7	0	0	10	3	0.583333	0.5	-0.165898	262.011	0.666667	0.764706	Condensed aromatic	-1.36394	LVOC	294.916	176.735	63446.9	0.0434313	218323	0.0781134	341322	0.0932985
295.025	C16H8O6	O6	CHO	16	8	6	0	0	13	7	0.375	0.5	-0.14592	296.032	0.25	0.769231	Condensed aromatic	-1.9454	LVOC	292.845	179.175	77437.6	0.0530083	186018	0.0665549	341285	0.0932884
169.014	C7H6O5	O5	CHO	7	6	5	0	0	5	0	0.714286	0.857143	-0.0334291	170.022	0.571429	0.555556	Aromatic	2.63993	IVOC	269.65	173.852	223452	0.152959	339832	0.121588	294425	0.0804795
282.062	C12H13NO7	NO7	CHNO	12	13	7	1	0	7	0	0.583333	1.08333	0.00141813	283.069	-0.333333	0.333333	High O unsaturated	-1.46377	LVOC	NA	NA	128588	0.0880221	263390	0.0942377	339489	0.0927974
331.031	C12H12O11	O11	CHO	12	12	11	0	0	7	-4	0.916667	1	0.0359483	332.038	0.833333	0.230769	High O unsaturated	-5.20675	ELVOC	329.535	181.1	NA	NA	157697	0.0564222	337615	0.0922853
315.015	C15H8O8	O8	CHO	15	8	8	0	0	12	4	0.533333	0.533333	0.161897	316.022	0.533333	0.727273	Condensed aromatic	-3.32451	LVOC	307.286	179.514	45183.5	0.0309294	145915	0.0522066	336781	0.0920574
241.108	C12H18O5	O5	CHO	12	18	5	0	0	4	-1	0.416667	1.5	-0.0157606	242.115	-0.666667	0.157895	Low O unsaturated	2.23827	SVOC	288.323	181.679	335265	0.229499	279058	0.0998434	156897	0.0428869
301.02	C11H10O10	O10	CHO	11	10	10	0	0	7	-3	0.909091	0.909091	0.173078	302.027	0.909091	0.333333	High O unsaturated	-3.98633	ELVOC	321.408	179.394	NA	NA	150043	0.0536837	334470	0.0914254
262.036	C12H9NO6	NO6	CHNO	12	9	6	1	0	9	3	0.5	0.75	-0.327818	263.043	-0.166667	0.625	Aromatic	-0.903832	LVOC	NA	NA	126118	0.0863312	265430	0.0949676	334454	0.0914212
399.093	C17H20O11	O11	CHO	17	20	11	0	0	8	-3	0.647059	1.17647	0.0167881	400.101	0.117647	0.217391	High O unsaturated	-5.60182	ELVOC	341.604	186.796	74442.1	0.0509578	186953	0.0668893	334210	0.0913545
359.098	C15H20O10	O10	CHO	15	20	10	0	0	6	-4	0.666667	1.33333	-0.134643	360.106	0	0.1	High O unsaturated	-3.78527	ELVOC	334.402	185.522	149607	0.10241	301588	0.107904	334008	0.0912992
286.057	C11H13NO8	NO8	CHNO	11	13	8	1	0	6	-2	0.727273	1.18182	0.0952608	287.064	-0.181818	0.166667	High O unsaturated	-1.80964	LVOC	NA	NA	100031	0.0684742	205142	0.0733973	333930	0.091278
240.999	C9H6O8	O8	CHO	9	6	8	0	0	7	-1	0.888889	0.666667	0.0286308	242.006	1.11111	0.6	Aromatic	-1.54674	LVOC	303.006	175.701	46416.6	0.0317735	276346	0.0988732	333289	0.0911029
387.093	C16H20O11	O11	CHO	16	20	11	0	0	7	-4	0.6875	1.25	-0.250586	388.1	0.125	0.142857	High O unsaturated	-5.25305	ELVOC	340.559	186.305	88588.5	0.0606414	223810	0.0800763	332874	0.0909892
315.109	C14H20O8	O8	CHO	14	20	8	0	0	5	-3	0.571429	1.42857	-0.12218	316.116	-0.285714	0.1	High O unsaturated	-1.25366	LVOC	320.865	184.417	246287	0.16859	332411	0.118933	306755	0.0838498
293.103	C15H18O6	O6	CHO	15	18	6	0	0	7	1	0.4	1.2	-0.247353	294.11	-0.4	0.333333	Low O unsaturated	-0.0685026	SVOC	305.6	183.537	174021	0.119122	256074	0.0916202	331494	0.090612
377.073	C14H18O12	O12	CHO	14	18	12	0	0	6	-6	0.857143	1.28571	0.285091	378.08	0.428571	0	Aliphatic	-6.11577	ELVOC	341.409	184.813	NA	NA	160757	0.0575168	331488	0.0906106
213.056	C13H10O3	O3	CHO	13	10	3	0	0	9	6	0.230769	0.769231	-0.0497522	214.063	-0.307692	0.652174	Aromatic	2.09853	SVOC	254.235	177.968	259220	0.177444	331307	0.118538	277720	0.0759132
363.057	C13H16O12	O12	CHO	13	16	12	0	0	6	-6	0.923077	1.23077	0.27117	364.064	0.615385	0	Aliphatic	-6.15006	ELVOC	338.855	183.529	NA	NA	143326	0.0512802	331266	0.0905497
347.114	C18H20O7	O7	CHO	18	20	7	0	0	9	2	0.388889	1.11111	-0.293276	348.121	-0.333333	0.37931	Low O unsaturated	-2.10134	LVOC	320.67	185.992	119773	0.0819878	186802	0.0668353	330865	0.0904402
299.092	C17H16O5	O5	CHO	17	16	5	0	0	10	5	0.294118	0.941176	-0.0902731	300.1	-0.352941	0.517241	Aromatic	-0.583801	LVOC	297.94	183.23	138908	0.0950868	248656	0.0889662	330780	0.0904169
304.046	C14H11NO7	NO7	CHNO	14	11	7	1	0	10	3	0.5	0.785714	0.0300941	305.054	-0.142857	0.578947	Aromatic	-2.3091	LVOC	NA	NA	88990.1	0.0609163	215059	0.0769456	330704	0.0903961
333.025	C15H10O9	O9	CHO	15	10	9	0	0	11	2	0.6	0.666667	0.0999924	334.033	0.533333	0.619048	Aromatic	-4.08167	ELVOC	317.248	180.979	NA	NA	138952	0.0497153	330244	0.0902704
357.013	C10H14O12S	O12S	CHOS	10	14	12	0	1	4	-8	1.2	1.4	0.212037	358.021	0.4	0	Aliphatic	-7.23672	ELVOC	NA	NA	NA	NA	NA	NA	328963	0.0899204
250.036	C11H9NO6	NO6	CHNO	11	9	6	1	0	8	2	0.545455	0.818182	-0.0311955	251.043	-0.181818	0.571429	Aromatic	-0.517556	SVOC	NA	NA	179794	0.123074	301520	0.10788	327680	0.0895695
314.052	C12H13NO9	NO9	CHNO	12	13	9	1	0	7	-2	0.75	1.08333	-0.177678	315.059	1.11e-16	0.230769	High O unsaturated	-2.91269	LVOC	NA	NA	56258.1	0.0385103	167530	0.05994	326587	0.0892708
259.013	C6H12O9S	O9S	CHOS	6	12	9	0	1	1	-8	1.5	2	-0.152309	260.02	0	0	Aliphatic	-2.88546	LVOC	NA	NA	NA	NA	NA	NA	326044	0.0891223
357.098	C19H18O7	O7	CHO	19	18	7	0	0	11	4	0.368421	0.947368	-0.302858	358.105	-0.210526	0.483871	Low O unsaturated	-2.873	LVOC	319.9	185.649	90740.1	0.0621143	174686	0.0625005	325028	0.0888446
337.072	C19H14O6	O6	CHO	19	14	6	0	0	13	7	0.315789	0.736842	-0.0709048	338.079	-0.105263	0.625	Aromatic	-2.64717	LVOC	307.147	183.523	80097.1	0.0548288	183473	0.0656443	323864	0.0885264
351.051	C19H12O7	O7	CHO	19	12	7	0	0	14	7	0.368421	0.631579	0.149551	352.058	0.105263	0.677419	Condensed aromatic	-3.7052	ELVOC	311.057	182.917	53969.5	0.0369437	128487	0.045971	323245	0.0883573
338.052	C14H13NO9	NO9	CHNO	14	13	9	1	0	9	0	0.642857	0.928571	0.295369	339.059	1.11e-16	0.411765	High O unsaturated	-3.66174	ELVOC	NA	NA	44349.9	0.0303588	181845	0.0650618	322922	0.0882691
225.056	C14H10O3	O3	CHO	14	10	3	0	0	10	7	0.214286	0.714286	-0.0217724	226.063	-0.285714	0.68	Condensed aromatic	1.53158	SVOC	256.75	178.352	263477	0.180357	322874	0.11552	293807	0.0803106
289.02	C10H10O10	O10	CHO	10	10	10	0	0	6	-4	1	1	0.115736	290.027	1	0.2	High O unsaturated	-3.77167	ELVOC	320.972	178.859	NA	NA	175174	0.0626751	322861	0.0882523
204.03	C10H7NO4	NO4	CHNO	10	7	4	1	0	8	4	0.4	0.7	-0.043621	205.037	-0.4	0.714286	Condensed aromatic	1.19883	SVOC	NA	NA	227501	0.155731	322531	0.115398	236510	0.0646487
243.015	C9H8O8	O8	CHO	9	8	8	0	0	6	-2	0.888889	0.888889	-0.0228381	244.022	0.888889	0.4	High O unsaturated	-1.26934	LVOC	304.635	176.82	49829.2	0.0341095	191435	0.0684931	321892	0.0879875
227.092	C11H16O5	O5	CHO	11	16	5	0	0	4	-1	0.454545	1.45455	-0.0187148	228.1	-0.545455	0.176471	Low O unsaturated	2.42673	SVOC	284.172	180.433	321878	0.220335	312736	0.111893	183153	0.0500638
339.327	C22H44O2	O2	CHO	22	44	2	0	0	1	-1	0.0909091	2	0.130847	340.334	-1.81818	0	Aliphatic	1.89693	SVOC	291.411	192.167	321802	0.220283	241981	0.0865779	117206	0.0320378
318.062	C15H13NO7	NO7	CHNO	15	13	7	1	0	10	3	0.466667	0.866667	-0.285636	319.069	-0.266667	0.52381	Aromatic	-2.6229	LVOC	NA	NA	96962	0.0663733	191026	0.0683466	321684	0.0879305
290.067	C14H13NO6	NO6	CHNO	14	13	6	1	0	9	3	0.428571	0.928571	-0.318547	291.074	-0.428571	0.5	Low O unsaturated	-1.53427	LVOC	NA	NA	128302	0.0878266	226799	0.081146	321243	0.0878102
288.051	C14H11NO6	NO6	CHNO	14	11	6	1	0	10	4	0.428571	0.785714	-0.0416592	289.059	-0.285714	0.6	Aromatic	-1.60947	LVOC	NA	NA	118464	0.0810923	242383	0.0867216	321045	0.087756
312.073	C13H15NO8	NO8	CHNO	13	15	8	1	0	7	-1	0.615385	1.15385	0.134103	313.08	-0.307692	0.25	High O unsaturated	-2.48691	LVOC	NA	NA	102934	0.0704615	190783	0.0682597	320525	0.0876138
222.041	C10H9NO5	NO5	CHNO	10	9	5	1	0	7	2	0.5	0.9	-0.0236443	223.048	-0.4	0.538462	Aromatic	0.576635	SVOC	NA	NA	207073	0.141748	320157	0.114548	278750	0.0761949
335.056	C19H12O6	O6	CHO	19	12	6	0	0	14	8	0.315789	0.631579	0.0629745	336.063	0	0.6875	Condensed aromatic	-2.92457	LVOC	303.785	182.526	67278.7	0.0460542	166815	0.0596844	320090	0.0874949
391.103	C19H20O9	O9	CHO	19	20	9	0	0	10	1	0.473684	1.05263	-0.165685	392.111	-0.105263	0.37931	Low O unsaturated	-4.36136	ELVOC	334.053	187.111	90457.9	0.0619211	171397	0.0613236	320081	0.0874924
189.077	C8H14O5	O5	CHO	8	14	5	0	0	2	-3	0.625	1.75	-0.0491863	190.084	-0.5	0	Aliphatic	3.40111	IVOC	273.684	177.97	320061	0.219091	295293	0.105652	268506	0.0733948
208.025	C9H7NO5	NO5	CHNO	9	7	5	1	0	7	2	0.555556	0.777778	-0.0403797	209.032	-0.222222	0.636364	Aromatic	0.887382	SVOC	NA	NA	182644	0.125025	319860	0.114442	254312	0.0695149
375.093	C15H20O11	O11	CHO	15	20	11	0	0	6	-5	0.733333	1.33333	-0.114505	376.101	0.133333	0.0526316	High O unsaturated	-4.92544	ELVOC	339.447	185.793	89695.3	0.061399	213399	0.0763515	319173	0.0872442
323.114	C16H20O7	O7	CHO	16	20	7	0	0	7	0	0.4375	1.25	-0.382218	324.121	-0.375	0.28	Low O unsaturated	-1.14661	LVOC	317.343	185.086	151221	0.103515	220952	0.0790538	318834	0.0871516
326.052	C13H13NO9	NO9	CHNO	13	13	9	1	0	8	-1	0.692308	1	-0.311607	327.059	-5.55e-17	0.333333	High O unsaturated	-3.28542	LVOC	NA	NA	60253.7	0.0412454	168896	0.060429	318121	0.0869566
265.051	C16H10O4	O4	CHO	16	10	4	0	0	12	8	0.25	0.625	-0.208262	266.058	-0.125	0.714286	Condensed aromatic	-0.197594	SVOC	276.056	179.53	167118	0.114397	267337	0.0956499	318078	0.086945
287.092	C16H16O5	O5	CHO	16	16	5	0	0	9	4	0.3125	1	-0.353719	288.1	-0.375	0.481481	Low O unsaturated	-0.0529883	SVOC	296.023	182.816	165515	0.1133	270238	0.0966877	317917	0.086901
289.093	C12H18O8	O8	CHO	12	18	8	0	0	4	-4	0.666667	1.5	-0.147185	290.1	-0.166667	0	Aliphatic	-0.783354	LVOC	315.761	182.649	221747	0.151792	317884	0.113735	294258	0.0804338
267.03	C15H8O5	O5	CHO	15	8	5	0	0	12	7	0.333333	0.533333	-0.223196	268.037	0.133333	0.76	Condensed aromatic	-0.641074	LVOC	282.405	178.426	122544	0.0838847	244884	0.0876166	317735	0.0868512
137.024	C7H6O3	O3	CHO	7	6	3	0	0	5	2	0.428571	0.857143	-0.0485315	138.032	0	0.636364	Aromatic	4.70657	IVOC	233.117	173.208	286117	0.195855	317334	0.113538	209485	0.0572616
352.067	C15H15NO9	NO9	CHNO	15	15	9	1	0	9	0	0.6	1	-0.0149119	353.075	-0.133333	0.368421	High O unsaturated	-3.96598	ELVOC	NA	NA	71835.9	0.0491737	159772	0.0571646	316553	0.0865279
411.093	C18H20O11	O11	CHO	18	20	11	0	0	9	-2	0.611111	1.11111	0.11664	412.101	0.111111	0.28	High O unsaturated	-5.96955	ELVOC	342.588	187.268	64752.3	0.0443249	145824	0.0521739	316411	0.0864894
393.046	C17H14O11	O11	CHO	17	14	11	0	0	11	0	0.647059	0.823529	-0.2445	394.053	0.470588	0.478261	High O unsaturated	-6.43402	ELVOC	334.682	184.393	NA	NA	122139	0.0436997	315587	0.0862641
399.057	C16H16O12	O12	CHO	16	16	12	0	0	9	-3	0.75	1	0.0838226	400.064	0.5	0.3	High O unsaturated	-6.96096	ELVOC	340.991	185.064	NA	NA	125807	0.0450121	314721	0.0860274
407.098	C19H20O10	O10	CHO	19	20	10	0	0	10	0	0.526316	1.05263	0.121224	408.106	0	0.357143	High O unsaturated	-5.33239	ELVOC	339.023	187.425	70283.9	0.0481114	157769	0.0564477	313711	0.0857513
165.04	C5H10O6	O6	CHO	5	10	6	0	0	1	-5	1.2	2	-0.0645296	166.048	0.4	0	Aliphatic	2.38187	SVOC	277.079	174.747	97728.5	0.066898	120702	0.0431858	313678	0.0857421
245.082	C14H14O4	O4	CHO	14	14	4	0	0	8	4	0.285714	1	-0.029786	246.089	-0.428571	0.5	Low O unsaturated	1.45206	SVOC	277.58	180.703	206492	0.14135	313355	0.112115	262511	0.071756
215.071	C13H12O3	O3	CHO	13	12	3	0	0	8	5	0.230769	0.923077	-0.049286	216.079	-0.461538	0.565217	Aromatic	2.37593	SVOC	256.717	178.954	238527	0.163279	312870	0.111941	241071	0.0658956
270.062	C11H13NO7	NO7	CHNO	11	13	7	1	0	6	-1	0.636364	1.18182	-0.219024	271.069	-0.363636	0.230769	High O unsaturated	-1.08351	LVOC	NA	NA	125606	0.0859808	214004	0.0765678	311839	0.0852395
229.108	C11H18O5	O5	CHO	11	18	5	0	0	3	-2	0.454545	1.63636	-0.0517223	230.115	-0.727273	0.0588235	Low O unsaturated	2.70413	IVOC	285.35	181.133	311274	0.213076	213440	0.076366	120776	0.0330136
169.051	C8H10O4	O4	CHO	8	10	4	0	0	4	0	0.5	1.25	-0.0627031	170.058	-0.25	0.333333	High O unsaturated	3.87633	IVOC	257.403	176.05	286891	0.196385	310922	0.111244	177066	0.0484001
256.046	C10H11NO7	NO7	CHNO	10	11	7	1	0	6	-1	0.7	1.1	-0.00390554	257.054	-0.2	0.272727	High O unsaturated	-0.782408	LVOC	NA	NA	112448	0.0769741	244693	0.0875482	310043	0.0847487
341.018	C10H14O11S	O11S	CHOS	10	14	11	0	1	4	-7	1.1	1.4	-0.279604	342.026	0.2	0	Aliphatic	-6.06345	ELVOC	NA	NA	NA	NA	NA	NA	308975	0.0844566
252.051	C11H11NO6	NO6	CHNO	11	11	6	1	0	7	1	0.545455	1	0.00297558	253.059	-0.363636	0.428571	High O unsaturated	-0.442356	SVOC	NA	NA	170240	0.116534	289694	0.103649	307406	0.0840279
328.067	C13H15NO9	NO9	CHNO	13	15	9	1	0	7	-2	0.692308	1.15385	-0.157132	329.075	-0.153846	0.2	High O unsaturated	-3.21022	LVOC	NA	NA	77421.9	0.0529975	170799	0.0611097	306317	0.0837301
308.078	C14H15NO7	NO7	CHNO	14	15	7	1	0	8	1	0.5	1.07143	0.0855304	309.085	-0.428571	0.368421	High O unsaturated	-2.1587	LVOC	NA	NA	104152	0.0712952	218205	0.0780709	304994	0.0833685
221.082	C12H14O4	O4	CHO	12	14	4	0	0	6	2	0.333333	1.16667	-0.00316625	222.089	-0.5	0.4	Low O unsaturated	2.50873	IVOC	272.311	179.795	233497	0.159835	304331	0.108886	205002	0.0560362
339.087	C19H16O6	O6	CHO	19	16	6	0	0	12	6	0.315789	0.842105	-0.138312	340.095	-0.210526	0.5625	Aromatic	-2.36977	LVOC	310.059	184.43	94496.2	0.0646854	177701	0.0635793	303815	0.0830461
349.078	C13H18O11	O11	CHO	13	18	11	0	0	5	-6	0.846154	1.38462	0.0837922	350.085	0.307692	0	Aliphatic	-4.62167	ELVOC	335.548	184.017	59280.9	0.0405795	164981	0.0590282	303524	0.0829666
421.078	C19H18O11	O11	CHO	19	18	11	0	0	11	0	0.578947	0.947368	-0.0749268	422.085	0.210526	0.407407	High O unsaturated	-6.63175	ELVOC	341.222	186.956	49694.4	0.0340172	133967	0.0479317	302919	0.0828012
192.03	C9H7NO4	NO4	CHNO	9	7	4	1	0	7	3	0.444444	0.777778	-0.0541581	193.037	-0.444444	0.666667	Aromatic	1.59208	SVOC	NA	NA	203332	0.139186	302559	0.108252	242525	0.0662929
311.092	C18H16O5	O5	CHO	18	16	5	0	0	11	6	0.277778	0.888889	-0.331573	312.1	-0.333333	0.548387	Aromatic	-1.1227	LVOC	299.748	183.629	130152	0.0890929	197315	0.0705968	302488	0.0826834
238.036	C10H9NO6	NO6	CHNO	10	9	6	1	0	7	1	0.6	0.9	-0.0409602	239.043	-0.2	0.5	High O unsaturated	-0.134732	SVOC	NA	NA	157398	0.107744	286334	0.102447	302011	0.0825531
281.103	C14H18O6	O6	CHO	14	18	6	0	0	6	0	0.428571	1.28571	-0.0859116	282.11	-0.428571	0.272727	Low O unsaturated	0.408006	SVOC	303.549	183.057	234242	0.160345	274878	0.0983478	301766	0.0824862
337.02	C14H10O10	O10	CHO	14	10	10	0	0	10	0	0.714286	0.714286	0.165717	338.027	0.714286	0.555556	Aromatic	-4.83487	ELVOC	322.51	180.836	NA	NA	120348	0.0430591	301687	0.0824644
375.108	C19H20O8	O8	CHO	19	20	8	0	0	10	2	0.421053	1.05263	-0.406416	376.116	-0.210526	0.4	Low O unsaturated	-3.44692	LVOC	328.497	186.776	94829.3	0.0649134	185369	0.0663228	301524	0.0824199
155.035	C7H8O4	O4	CHO	7	8	4	0	0	4	0	0.571429	1.14286	-0.0293482	156.042	0	0.4	High O unsaturated	4.01444	IVOC	253.758	174.58	268183	0.183579	301336	0.107814	202497	0.0553514
325.02	C13H10O10	O10	CHO	13	10	10	0	0	9	-1	0.769231	0.769231	0.0666113	326.027	0.769231	0.5	High O unsaturated	-4.52238	ELVOC	322.171	180.38	NA	NA	128726	0.0460564	300353	0.0820998
413.073	C17H18O12	O12	CHO	17	18	12	0	0	9	-3	0.705882	1.05882	0.133391	414.08	0.352941	0.272727	High O unsaturated	-7.00262	ELVOC	343.9	186.328	38885.6	0.0266184	151945	0.054364	300229	0.0820659
279.066	C17H12O4	O4	CHO	17	12	4	0	0	12	8	0.235294	0.705882	0.0813427	280.074	-0.235294	0.666667	Aromatic	-0.478531	SVOC	281.226	180.952	147408	0.100905	267531	0.0957192	299939	0.0819866
367.358	C24H48O2	O2	CHO	24	48	2	0	0	1	-1	0.0833333	2	0.165914	368.365	-1.83333	0	Aliphatic	1.22616	SVOC	300.346	193.876	299409	0.204954	279843	0.100124	68019.4	0.0185927
385.056	C19H14O9	O9	CHO	19	14	9	0	0	13	4	0.473684	0.736842	-0.363323	386.064	0.210526	0.586207	Aromatic	-5.19356	ELVOC	326.274	184.613	42009.3	0.0287566	115159	0.0412024	299373	0.0818321
302.067	C15H13NO6	NO6	CHNO	15	13	6	1	0	10	4	0.4	0.866667	-0.0670381	303.074	-0.4	0.545455	Aromatic	-1.92805	LVOC	NA	NA	118510	0.0811236	217942	0.0779769	298968	0.0817212
403.067	C19H16O10	O10	CHO	19	16	10	0	0	12	2	0.526316	0.842105	-0.143276	404.074	0.210526	0.5	High O unsaturated	-5.88719	ELVOC	334.157	185.832	51876.3	0.0355108	119042	0.0425917	298814	0.0816791
257.082	C15H14O4	O4	CHO	15	14	4	0	0	9	5	0.266667	0.933333	0.00953004	258.089	-0.4	0.538462	Aromatic	0.908652	SVOC	279.939	181.126	190697	0.130538	298660	0.106857	269711	0.073724
407.062	C18H16O11	O11	CHO	18	16	11	0	0	11	0	0.611111	0.888889	-0.124305	408.069	0.333333	0.44	High O unsaturated	-6.52435	ELVOC	337.982	185.704	NA	NA	134446	0.048103	298396	0.081565
337.035	C18H10O7	O7	CHO	18	10	7	0	0	14	7	0.388889	0.555556	-0.352634	338.043	0.222222	0.724138	Condensed aromatic	-3.48834	LVOC	306.363	181.463	52941.2	0.0362398	139247	0.049821	297987	0.081453
331.103	C14H20O9	O9	CHO	14	20	9	0	0	5	-4	0.642857	1.42857	-0.0626692	332.111	-0.142857	0.0526316	High O unsaturated	-2.32303	LVOC	327.298	184.714	175812	0.120349	297504	0.106443	289213	0.0790548
218.046	C11H9NO4	NO4	CHNO	11	9	4	1	0	8	4	0.363636	0.818182	-0.035543	219.053	-0.545455	0.625	Aromatic	0.878015	SVOC	NA	NA	218135	0.149319	297453	0.106425	224288	0.061308
203.071	C12H12O3	O3	CHO	12	12	3	0	0	7	4	0.25	1	-0.0376715	204.079	-0.5	0.52381	Aromatic	2.93529	IVOC	253.686	178.524	222561	0.152349	297404	0.106407	191595	0.0523715
266.031	C11H9NO7	NO7	CHNO	11	9	7	1	0	8	1	0.636364	0.818182	-0.0150359	267.038	-1.11e-16	0.538462	Aromatic	-1.23391	LVOC	NA	NA	84704.5	0.0579827	218573	0.0782028	297314	0.0812692
278.067	C13H13NO6	NO6	CHNO	13	13	6	1	0	8	2	0.461538	1	-0.0645528	279.074	-0.461538	0.444444	Low O unsaturated	-1.14262	LVOC	NA	NA	153782	0.105268	242621	0.0868069	296979	0.0811776
320.041	C14H11NO8	NO8	CHNO	14	11	8	1	0	10	2	0.571429	0.785714	0.0426508	321.048	0	0.555556	Aromatic	-3.01869	LVOC	NA	NA	62524.4	0.0427998	170664	0.0610615	296043	0.0809217
263.093	C14H16O5	O5	CHO	14	16	5	0	0	7	2	0.357143	1.14286	0.0296474	264.1	-0.428571	0.391304	Low O unsaturated	0.979273	SVOC	291.799	181.93	214968	0.147152	295630	0.105773	285548	0.0780529
239.035	C14H8O4	O4	CHO	14	8	4	0	0	11	7	0.285714	0.571429	-0.0479009	240.042	0	0.75	Condensed aromatic	0.619859	SVOC	269.069	177.652	188356	0.128935	295596	0.105761	291111	0.0795736
345.025	C16H10O9	O9	CHO	16	10	9	0	0	12	3	0.5625	0.625	-0.353742	346.032	0.5	0.652174	Aromatic	-4.47349	ELVOC	317.709	181.388	NA	NA	122851	0.0439544	295322	0.0807248
389.051	C18H14O10	O10	CHO	18	14	10	0	0	12	2	0.555556	0.777778	0.143297	390.059	0.333333	0.538462	Aromatic	-5.75242	ELVOC	330.604	184.526	NA	NA	120827	0.0432303	294686	0.0805508
311.114	C15H20O7	O7	CHO	15	20	7	0	0	6	-1	0.466667	1.33333	0.113463	312.121	-0.4	0.217391	Low O unsaturated	-0.689219	LVOC	315.52	184.603	215464	0.147492	291551	0.104313	293325	0.0801788
239.092	C12H16O5	O5	CHO	12	16	5	0	0	5	0	0.416667	1.33333	-0.00167299	240.1	-0.5	0.263158	Low O unsaturated	1.96087	SVOC	286.924	180.958	252845	0.17308	293237	0.104917	204337	0.0558544
399.072	C20H16O9	O9	CHO	20	16	9	0	0	13	4	0.45	0.8	0.326883	400.08	0.1	0.548387	Aromatic	-5.36854	ELVOC	330.074	185.914	43687.8	0.0299055	116459	0.0416678	293028	0.0800976
248.056	C12H11NO5	NO5	CHNO	12	11	5	1	0	8	3	0.416667	0.916667	0.0126987	249.064	-0.5	0.529412	Aromatic	-0.129926	SVOC	NA	NA	184896	0.126567	292379	0.10461	282448	0.0772058
332.078	C16H15NO7	NO7	CHNO	16	15	7	1	0	10	3	0.4375	0.9375	0.233078	333.085	-0.375	0.478261	Low O unsaturated	-2.93886	LVOC	NA	NA	100667	0.0689094	189766	0.0678961	291855	0.079777
246.041	C12H9NO5	NO5	CHNO	12	9	5	1	0	9	4	0.416667	0.75	-0.13006	247.048	-0.333333	0.647059	Aromatic	-0.205126	SVOC	NA	NA	166817	0.114191	281924	0.100869	291708	0.0797367
320.078	C15H15NO7	NO7	CHNO	15	15	7	1	0	9	2	0.466667	1	0.0409276	321.085	-0.4	0.428571	Low O unsaturated	-2.5477	LVOC	NA	NA	110516	0.0756517	193641	0.0692825	291542	0.0796915
300.051	C15H11NO6	NO6	CHNO	15	11	6	1	0	11	5	0.4	0.733333	-0.0303281	301.059	-0.266667	0.636364	Aromatic	-2.00325	LVOC	NA	NA	88708.1	0.0607233	212187	0.0759179	290878	0.0795099
371.041	C18H12O9	O9	CHO	18	12	9	0	0	13	4	0.5	0.666667	0.188658	372.048	0.333333	0.62963	Aromatic	-5.03127	ELVOC	322.313	183.24	NA	NA	115319	0.0412597	290726	0.0794683
165.056	C9H10O3	O3	CHO	9	10	3	0	0	5	2	0.333333	1.11111	-0.00848198	166.063	-0.444444	0.466667	Low O unsaturated	4.27153	IVOC	241.76	176.211	239757	0.164121	290558	0.103958	172342	0.0471088
343.031	C13H12O11	O11	CHO	13	12	11	0	0	8	-3	0.846154	0.923077	0.181762	344.038	0.769231	0.333333	High O unsaturated	-5.45387	ELVOC	330.031	181.613	NA	NA	111137	0.0397636	290218	0.0793296
373.041	C14H14O12	O12	CHO	14	14	12	0	0	8	-4	0.857143	1	0.395533	374.049	0.714286	0.25	High O unsaturated	-6.67057	ELVOC	337.586	183.25	NA	NA	96351.5	0.0344734	290187	0.0793211
251.092	C13H16O5	O5	CHO	13	16	5	0	0	6	1	0.384615	1.23077	-0.0179217	252.1	-0.461538	0.333333	Low O unsaturated	1.47746	SVOC	289.456	181.456	212080	0.145175	290111	0.103798	225200	0.0615573
196.025	C8H7NO5	NO5	CHNO	8	7	5	1	0	6	1	0.625	0.875	-0.0346894	197.032	-0.25	0.555556	Aromatic	1.26903	SVOC	NA	NA	154617	0.105839	289510	0.103583	246279	0.067319
286.036	C14H9NO6	NO6	CHNO	14	9	6	1	0	11	5	0.428571	0.642857	-0.0583843	287.043	-0.142857	0.7	Condensed aromatic	-1.68467	LVOC	NA	NA	83877.8	0.0574168	202325	0.0723895	288869	0.0789607
296.078	C13H15NO7	NO7	CHNO	13	15	7	1	0	7	0	0.538462	1.15385	-0.0952453	297.085	-0.461538	0.294118	High O unsaturated	-1.77219	LVOC	NA	NA	121425	0.0831192	206793	0.0739879	288263	0.0787951
375.036	C17H12O10	O10	CHO	17	12	10	0	0	12	2	0.588235	0.705882	-0.42116	376.043	0.470588	0.583333	Aromatic	-5.63332	ELVOC	326.936	183.15	NA	NA	100243	0.0358659	288110	0.0787533
274.036	C13H9NO6	NO6	CHNO	13	9	6	1	0	10	4	0.461538	0.692308	0.0855728	275.043	-0.153846	0.666667	Aromatic	-1.29302	LVOC	NA	NA	107268	0.0734283	232612	0.0832259	287299	0.0785316
356.062	C14H15NO10	NO10	CHNO	14	15	10	1	0	8	-2	0.714286	1.07143	0.0988591	357.07	1.11e-16	0.25	High O unsaturated	-4.31237	ELVOC	NA	NA	47246.9	0.0323418	131264	0.0469647	286917	0.0784271
364.068	C16H15NO9	NO9	CHNO	16	15	9	1	0	10	1	0.5625	0.9375	0.278245	365.075	-0.125	0.428571	High O unsaturated	-4.34818	ELVOC	NA	NA	56618.2	0.0387568	154094	0.055133	286694	0.0783664
269.082	C16H14O4	O4	CHO	16	14	4	0	0	10	6	0.25	0.875	0.0267576	270.089	-0.375	0.571429	Aromatic	0.357206	SVOC	282.145	181.531	185179	0.12676	286576	0.102533	281578	0.0769677
240.051	C10H11NO6	NO6	CHNO	10	11	6	1	0	6	0	0.6	1.1	-0.24953	241.059	-0.4	0.333333	High O unsaturated	-0.059532	SVOC	NA	NA	143717	0.0983783	244716	0.0875562	286276	0.078252
284.992	C7H10O10S	O10S	CHOS	7	10	10	0	1	3	-7	1.42857	1.42857	-0.0768442	285.999	0.571429	0	Aliphatic	-4.64343	ELVOC	NA	NA	NA	NA	NA	NA	286092	0.0782017
287.114	C13H20O7	O7	CHO	13	20	7	0	0	4	-3	0.538462	1.53846	0.041447	288.121	-0.461538	0.0526316	High O unsaturated	0.175646	SVOC	311.478	183.57	284921	0.195036	285437	0.102126	199284	0.0544731
425.073	C18H18O12	O12	CHO	18	18	12	0	0	10	-2	0.666667	1	0.139976	426.08	0.333333	0.333333	High O unsaturated	-7.34199	ELVOC	344.633	186.792	42866	0.029343	124925	0.0446966	285043	0.077915
371.029	C11H16O12S	O12S	CHOS	11	16	12	0	1	4	-8	1.09091	1.45455	0.119263	372.036	0.181818	0	Aliphatic	-7.23249	ELVOC	NA	NA	NA	NA	NA	NA	285017	0.0779079
330.062	C16H13NO7	NO7	CHNO	16	13	7	1	0	11	4	0.4375	0.8125	0.0645333	331.069	-0.25	0.565217	Aromatic	-3.01406	LVOC	NA	NA	73407.6	0.0502496	167855	0.0600565	284400	0.0777393
206.009	C9H5NO5	NO5	CHNO	9	5	5	1	0	8	3	0.555556	0.555556	-0.0347071	207.017	0	0.818182	Condensed aromatic	0.812182	SVOC	NA	NA	152260	0.104226	284259	0.101704	203452	0.0556126
234.988	C10H4O7	O7	CHO	10	4	7	0	0	9	2	0.7	0.4	-0.144262	235.996	1	0.846154	Condensed aromatic	-0.915109	LVOC	291.29	174.537	56390	0.0386006	250497	0.0896248	284174	0.0776774
183.066	C9H12O4	O4	CHO	9	12	4	0	0	4	0	0.444444	1.33333	-0.0731975	184.074	-0.444444	0.285714	Low O unsaturated	3.70617	IVOC	261.605	177.449	274657	0.18801	283992	0.101609	142356	0.0389121
211.04	C13H8O3	O3	CHO	13	8	3	0	0	10	7	0.230769	0.615385	-0.0563874	212.047	-0.153846	0.73913	Condensed aromatic	1.82113	SVOC	251.199	176.856	233748	0.160007	283938	0.10159	224479	0.06136
210.041	C9H9NO5	NO5	CHNO	9	9	5	1	0	6	1	0.555556	1	-0.0214244	211.048	-0.444444	0.454545	High O unsaturated	0.962582	SVOC	NA	NA	182425	0.124875	283562	0.101455	263785	0.0721042
290.031	C13H9NO7	NO7	CHNO	13	9	7	1	0	10	3	0.538462	0.692308	-0.0565458	291.038	-5.55e-17	0.647059	Aromatic	-1.99779	LVOC	NA	NA	54055	0.0370022	189817	0.0679142	283271	0.0774307
321.041	C18H10O6	O6	CHO	18	10	6	0	0	14	8	0.333333	0.555556	0.24919	322.048	0.111111	0.733333	Condensed aromatic	-2.68127	LVOC	298.888	181.078	80308.5	0.0549735	171493	0.061358	282922	0.0773351
423.093	C19H20O11	O11	CHO	19	20	11	0	0	10	-1	0.578947	1.05263	-0.0888693	424.101	0.105263	0.333333	High O unsaturated	-6.35435	ELVOC	343.52	187.721	55549.9	0.0380255	147805	0.052883	282773	0.0772944
357.119	C16H22O9	O9	CHO	16	22	9	0	0	6	-3	0.5625	1.375	0.168431	358.126	-0.25	0.130435	High O unsaturated	-2.80909	LVOC	331.977	186.411	158485	0.108488	242722	0.0868431	282764	0.077292
366.083	C16H17NO9	NO9	CHNO	16	17	9	1	0	9	0	0.5625	1.0625	0.0938312	367.09	-0.25	0.333333	High O unsaturated	-4.27298	ELVOC	NA	NA	68399.5	0.0468215	152366	0.0545147	281869	0.0770475
277.02	C9H10O10	O10	CHO	9	10	10	0	0	5	-5	1.11111	1.11111	0.0364594	278.027	1.11111	0	Aliphatic	-3.60008	ELVOC	320.49	178.291	NA	NA	146072	0.0522629	281828	0.0770361
227.071	C14H12O3	O3	CHO	14	12	3	0	0	9	6	0.214286	0.857143	-0.0279648	228.079	-0.428571	0.6	Aromatic	1.80898	SVOC	259.523	179.362	223336	0.15288	281466	0.100705	244584	0.0668556
368.062	C15H15NO10	NO10	CHNO	15	15	10	1	0	9	-1	0.666667	1	0.332824	369.07	-5.55e-17	0.333333	High O unsaturated	-4.68713	ELVOC	NA	NA	50080.9	0.0342818	139656	0.0499673	280595	0.076699
329.103	C18H18O6	O6	CHO	18	18	6	0	0	10	4	0.333333	1	-0.158461	330.11	-0.333333	0.466667	Low O unsaturated	-1.57167	LVOC	311.02	184.857	114231	0.0781944	203536	0.0728228	280542	0.0766847
415.088	C17H20O12	O12	CHO	17	20	12	0	0	8	-4	0.705882	1.17647	0.183696	416.096	0.235294	0.181818	High O unsaturated	-6.72522	ELVOC	345.944	187.065	64838.5	0.0443838	180603	0.0646176	280291	0.076616
348.072	C16H15NO8	NO8	CHNO	16	15	8	1	0	10	2	0.5	0.9375	-0.0109173	349.08	-0.25	0.454545	High O unsaturated	-3.63917	ELVOC	NA	NA	77803.4	0.0532587	170962	0.0611681	279806	0.0764835
381.119	C18H22O9	O9	CHO	18	22	9	0	0	8	-1	0.5	1.22222	0.293215	382.127	-0.222222	0.259259	High O unsaturated	-3.64427	ELVOC	334.825	187.372	112189	0.0767963	176127	0.063016	279692	0.0764522
383.077	C20H16O8	O8	CHO	20	16	8	0	0	13	5	0.4	0.8	-0.134438	384.084	0	0.5625	Aromatic	-4.48005	ELVOC	324.665	185.57	52827.1	0.0361617	139439	0.0498894	279519	0.0764051
233.082	C13H14O4	O4	CHO	13	14	4	0	0	7	3	0.307692	1.07692	-0.0313195	234.089	-0.461538	0.454545	Low O unsaturated	1.98601	SVOC	275.047	180.26	222401	0.15224	279379	0.0999585	248424	0.0679054
427.088	C18H20O12	O12	CHO	18	20	12	0	0	9	-3	0.666667	1.11111	-0.165071	428.095	0.222222	0.25	High O unsaturated	-7.06459	ELVOC	346.808	187.543	52413.9	0.0358789	125644	0.044954	279197	0.0763171
361.041	C13H14O12	O12	CHO	13	14	12	0	0	7	-5	0.923077	1.07692	0.117161	362.049	0.769231	0.142857	High O unsaturated	-6.42746	ELVOC	337.038	182.734	NA	NA	104999	0.0375674	278455	0.0761141
300.072	C12H15NO8	NO8	CHNO	12	15	8	1	0	6	-2	0.666667	1.25	-0.128636	301.08	-0.333333	0.142857	High O unsaturated	-2.10879	LVOC	NA	NA	84135.2	0.057593	181046	0.064776	278380	0.0760936
283.119	C14H20O6	O6	CHO	14	20	6	0	0	5	-1	0.428571	1.42857	0.0453873	284.126	-0.571429	0.181818	Low O unsaturated	0.685406	SVOC	305.152	183.757	251403	0.172092	278252	0.0995552	215411	0.0588813
419.098	C20H20O10	O10	CHO	20	20	10	0	0	11	1	0.5	1	-0.0307804	420.106	0	0.4	High O unsaturated	-5.75867	ELVOC	340.026	187.856	54474.6	0.0372894	144160	0.0515787	278134	0.0760264
327.015	C16H8O8	O8	CHO	16	8	8	0	0	13	5	0.5	0.5	0.288978	328.022	0.5	0.75	Condensed aromatic	-3.74907	ELVOC	307.621	179.891	NA	NA	121506	0.0434733	278074	0.07601
206.046	C10H9NO4	NO4	CHNO	10	9	4	1	0	7	3	0.4	0.9	-0.0550848	207.053	-0.6	0.571429	Aromatic	1.27403	SVOC	NA	NA	201203	0.137729	276834	0.0990476	221307	0.0604931
307.01	C13H8O9	O9	CHO	13	8	9	0	0	10	1	0.692308	0.615385	0.169213	308.017	0.769231	0.647059	Aromatic	-3.63871	ELVOC	313.19	179.004	NA	NA	140217	0.050168	276275	0.0755181
180.03	C8H7NO4	NO4	CHNO	8	7	4	1	0	6	2	0.5	0.875	-0.0136088	181.038	-0.5	0.6	Aromatic	1.9819	SVOC	NA	NA	206479	0.141341	276156	0.0988053	220212	0.0601938
195.066	C10H12O4	O4	CHO	10	12	4	0	0	5	1	0.4	1.2	-0.0292208	196.074	-0.4	0.375	Low O unsaturated	3.23344	IVOC	264.855	177.972	247991	0.169757	275785	0.0986723	201687	0.0551301
367.046	C19H12O8	O8	CHO	19	12	8	0	0	14	6	0.421053	0.631579	-0.159653	368.053	0.210526	0.666667	Aromatic	-4.55652	ELVOC	317.356	183.281	NA	NA	103225	0.0369327	275585	0.0753298
346.057	C16H13NO8	NO8	CHNO	16	13	8	1	0	11	3	0.5	0.8125	0.0680524	347.064	-0.125	0.545455	Aromatic	-3.71437	ELVOC	NA	NA	59993.6	0.0410674	159527	0.0570767	275485	0.0753023
360.072	C17H15NO8	NO8	CHNO	17	15	8	1	0	11	3	0.470588	0.882353	-0.389644	361.08	-0.235294	0.5	Low O unsaturated	-4.02802	ELVOC	NA	NA	60722.1	0.041566	133373	0.0477193	275263	0.0752417
276.999	C12H6O8	O8	CHO	12	6	8	0	0	10	2	0.666667	0.5	-0.0974733	278.006	0.833333	0.75	Condensed aromatic	-2.44775	LVOC	302.711	177.045	44536.5	0.0304866	144777	0.0517995	274867	0.0751334
367.031	C15H12O11	O11	CHO	15	12	11	0	0	10	-1	0.733333	0.8	-0.268097	368.038	0.666667	0.473684	High O unsaturated	-6.03504	ELVOC	330.916	182.567	NA	NA	123205	0.0440812	274854	0.0751298
254.031	C10H9NO7	NO7	CHNO	10	9	7	1	0	7	0	0.7	0.9	-0.0895561	255.038	-1.11e-16	0.454545	High O unsaturated	-0.857608	LVOC	NA	NA	67287.6	0.0460603	181211	0.0648349	274840	0.075126
350.052	C15H13NO9	NO9	CHNO	15	13	9	1	0	10	1	0.6	0.866667	0.0134266	351.059	-5.55e-17	0.473684	High O unsaturated	-4.04118	ELVOC	NA	NA	46077.2	0.0315412	144770	0.0517969	274399	0.0750055
319.119	C17H20O6	O6	CHO	17	20	6	0	0	8	2	0.352941	1.17647	0.021622	320.126	-0.470588	0.357143	Low O unsaturated	-0.782544	LVOC	311.366	185.18	126197	0.0863855	204339	0.0731101	273099	0.0746501
239.071	C15H12O3	O3	CHO	15	12	3	0	0	10	7	0.2	0.8	-0.0163131	240.079	-0.4	0.62963	Aromatic	1.23573	SVOC	262.135	179.753	191351	0.130985	273013	0.0976805	238901	0.0653022
385.093	C20H18O8	O8	CHO	20	18	8	0	0	12	4	0.4	0.9	0.368093	386.1	-0.1	0.5	Low O unsaturated	-4.20265	ELVOC	327.364	186.414	59214.3	0.0405339	145885	0.0521958	272914	0.0745996
316.046	C15H11NO7	NO7	CHNO	15	11	7	1	0	11	4	0.466667	0.733333	0.000632819	317.054	-0.133333	0.619048	Aromatic	-2.6981	LVOC	NA	NA	70788.7	0.0484569	174574	0.0624602	272360	0.0744482
439.088	C19H20O12	O12	CHO	19	20	12	0	0	10	-2	0.631579	1.05263	-0.0750419	440.095	0.210526	0.307692	High O unsaturated	-7.42232	ELVOC	347.624	188.002	42932.1	0.0293883	125518	0.0449086	271948	0.0743354
403.088	C16H20O12	O12	CHO	16	20	12	0	0	7	-5	0.75	1.25	-0.0512295	404.095	0.25	0.1	High O unsaturated	-6.40616	ELVOC	345.029	186.568	62999.2	0.0431247	184754	0.0661028	271621	0.0742461
355.031	C14H12O11	O11	CHO	14	12	11	0	0	9	-2	0.785714	0.857143	0.040419	356.038	0.714286	0.411765	High O unsaturated	-5.73113	ELVOC	330.489	182.101	NA	NA	101008	0.0361395	271445	0.0741982
347.098	C14H20O10	O10	CHO	14	20	10	0	0	5	-5	0.714286	1.42857	0.0911845	348.106	0	0	Aliphatic	-3.44787	LVOC	333.053	184.993	107283	0.0734381	211633	0.0757198	271189	0.0741281
272.056	C14H11NO5	NO5	CHNO	14	11	5	1	0	10	5	0.357143	0.785714	-0.238002	273.064	-0.428571	0.619048	Aromatic	-0.921379	LVOC	NA	NA	115888	0.079329	215361	0.0770535	271064	0.0740937
213.004	C8H6O7	O7	CHO	8	6	7	0	0	6	-1	0.875	0.75	-0.023239	214.011	1	0.555556	Aromatic	-0.050514	SVOC	294.012	174.934	50520.4	0.0345827	211205	0.0755667	270620	0.0739724
270.041	C14H9NO5	NO5	CHNO	14	9	5	1	0	11	6	0.357143	0.642857	-0.232002	271.048	-0.285714	0.714286	Condensed aromatic	-0.996579	LVOC	NA	NA	107312	0.0734579	205272	0.0734437	270518	0.0739447
353.124	C17H22O8	O8	CHO	17	22	8	0	0	7	-1	0.470588	1.29412	-0.0673984	354.131	-0.352941	0.230769	Low O unsaturated	-2.24778	LVOC	327.567	186.582	131754	0.0901894	203994	0.0729866	269962	0.0737926
353.03	C18H10O8	O8	CHO	18	10	8	0	0	14	6	0.444444	0.555556	-0.406056	354.037	0.333333	0.714286	Condensed aromatic	-4.36678	ELVOC	312.838	181.822	NA	NA	108816	0.0389329	269881	0.0737705
246.988	C11H4O7	O7	CHO	11	4	7	0	0	10	3	0.636364	0.363636	-0.279365	247.996	0.909091	0.866667	Condensed aromatic	-1.26374	LVOC	290.668	174.929	50558.8	0.034609	189915	0.0679491	269710	0.0737237
232.025	C11H7NO5	NO5	CHNO	11	7	5	1	0	9	4	0.454545	0.636364	-0.00624932	233.032	-0.181818	0.733333	Condensed aromatic	0.111993	SVOC	NA	NA	150055	0.102717	269358	0.096373	232382	0.0635204
321.077	C19H14O5	O5	CHO	19	14	5	0	0	13	8	0.263158	0.736842	0.173012	322.084	-0.210526	0.636364	Aromatic	-1.94607	LVOC	298.546	183.103	80336.3	0.0549925	171628	0.0614062	269285	0.0736077
236.056	C11H11NO5	NO5	CHNO	11	11	5	1	0	7	2	0.454545	1	-0.0108025	237.064	-0.545455	0.466667	Low O unsaturated	0.262393	SVOC	NA	NA	179851	0.123113	268953	0.096228	249874	0.0683016
236.02	C10H7NO6	NO6	CHNO	10	7	6	1	0	8	2	0.6	0.7	-0.0114397	237.027	0	0.666667	Aromatic	-0.209932	SVOC	NA	NA	109216	0.0747618	268757	0.096158	253838	0.0693852
354.083	C15H17NO9	NO9	CHNO	15	17	9	1	0	8	-1	0.6	1.13333	-0.173688	355.09	-0.266667	0.263158	High O unsaturated	-3.89078	ELVOC	NA	NA	74722.2	0.0511495	142875	0.0511188	268055	0.0732713
302.052	C11H13NO9	NO9	CHNO	11	13	9	1	0	6	-3	0.818182	1.18182	0.14087	303.059	0	0.0909091	High O unsaturated	-2.54407	LVOC	NA	NA	59781.8	0.0409224	125390	0.044863	267973	0.073249
283.01	C11H8O9	O9	CHO	11	8	9	0	0	8	-1	0.818182	0.727273	0.0183739	284.017	0.909091	0.538462	Aromatic	-3.02379	LVOC	312.802	178.094	NA	NA	140174	0.0501525	267594	0.0731454
411.057	C17H16O12	O12	CHO	17	16	12	0	0	10	-2	0.705882	0.941176	-0.0152047	412.064	0.470588	0.363636	High O unsaturated	-7.28002	ELVOC	341.614	185.532	NA	NA	110979	0.0397069	267459	0.0731085
367.082	C20H16O7	O7	CHO	20	16	7	0	0	13	6	0.35	0.8	-0.0238366	368.09	-0.1	0.575758	Aromatic	-3.65425	ELVOC	318.532	185.202	59105.9	0.0404597	162331	0.0580801	267456	0.0731076
224.02	C9H7NO6	NO6	CHNO	9	7	6	1	0	7	1	0.666667	0.777778	-0.230783	225.027	-1.11e-16	0.6	Aromatic	0.168748	SVOC	NA	NA	94894.3	0.0649579	264174	0.0945181	267190	0.073035
316.067	C12H15NO9	NO9	CHNO	12	15	9	1	0	6	-3	0.75	1.25	-0.127663	317.075	-0.166667	0.0769231	High O unsaturated	-2.83749	LVOC	NA	NA	52106.9	0.0356687	136364	0.0487893	266964	0.0729731
417.083	C20H18O10	O10	CHO	20	18	10	0	0	12	2	0.5	0.9	0.0368033	418.09	0.1	0.466667	High O unsaturated	-6.03607	ELVOC	337.612	187.077	48598.8	0.0332673	123099	0.0440432	266262	0.0727813
258.041	C13H9NO5	NO5	CHNO	13	9	5	1	0	10	5	0.384615	0.692308	-0.161021	259.048	-0.307692	0.684211	Condensed aromatic	-0.599843	LVOC	NA	NA	133995	0.0917236	240730	0.0861302	265654	0.0726152
277.051	C17H10O4	O4	CHO	17	10	4	0	0	13	9	0.235294	0.588235	-0.221801	278.058	-0.117647	0.733333	Condensed aromatic	-0.755931	LVOC	277.688	179.878	133293	0.0912432	210740	0.0754003	265590	0.0725976
260.056	C13H11NO5	NO5	CHNO	13	11	5	1	0	9	4	0.384615	0.846154	-0.00442212	261.064	-0.461538	0.578947	Aromatic	-0.524643	LVOC	NA	NA	166217	0.11378	265323	0.0949294	255586	0.0698629
266.067	C12H13NO6	NO6	CHNO	12	13	6	1	0	7	1	0.5	1.08333	-0.168379	267.074	-0.5	0.375	High O unsaturated	-0.753432	LVOC	NA	NA	145985	0.0999308	245373	0.0877913	265134	0.072473
319.061	C19H12O5	O5	CHO	19	12	5	0	0	14	9	0.263158	0.631579	-0.126151	320.068	-0.105263	0.69697	Condensed aromatic	-2.22347	LVOC	295.184	182.104	79064.5	0.054122	140267	0.0501856	264923	0.0724152
365.067	C20H14O7	O7	CHO	20	14	7	0	0	14	7	0.35	0.7	-0.108747	366.074	0	0.636364	Aromatic	-3.93165	ELVOC	315.472	184.282	50966.5	0.034888	128661	0.0460334	264918	0.0724138
435.093	C20H20O11	O11	CHO	20	20	11	0	0	11	0	0.55	1	0.120894	436.101	0.1	0.37931	High O unsaturated	-6.75458	ELVOC	344.403	188.158	44118.3	0.0302003	129279	0.0462543	264610	0.0723298
272.041	C10H11NO8	NO8	CHNO	10	11	8	1	0	6	-2	0.8	1.1	0.0477869	273.048	0	0.2	High O unsaturated	-1.51488	LVOC	NA	NA	61567.6	0.0421448	170485	0.0609974	264390	0.0722695
359.114	C19H20O7	O7	CHO	19	20	7	0	0	10	3	0.368421	1.05263	0.113892	360.121	-0.315789	0.419355	Low O unsaturated	-2.5956	LVOC	322.197	186.419	86406.9	0.059148	169429	0.0606197	263913	0.0721391
419.062	C19H16O11	O11	CHO	19	16	11	0	0	12	1	0.578947	0.842105	0.195556	420.069	0.315789	0.481481	High O unsaturated	-6.90915	ELVOC	338.653	186.13	NA	NA	105734	0.0378304	263045	0.071902
370.078	C15H17NO10	NO10	CHNO	15	17	10	1	0	8	-2	0.666667	1.13333	0.187258	371.085	-0.133333	0.222222	High O unsaturated	-4.61193	ELVOC	NA	NA	62072.5	0.0424904	126990	0.0454354	262877	0.071856
437.073	C19H18O12	O12	CHO	19	18	12	0	0	11	-1	0.631579	0.947368	-0.0335185	438.08	0.315789	0.384615	High O unsaturated	-7.69972	ELVOC	345.327	187.238	43512.9	0.0297859	99592.9	0.0356331	262171	0.0716631
349.072	C20H14O6	O6	CHO	20	14	6	0	0	14	8	0.3	0.7	-0.0154696	350.079	-0.1	0.647059	Aromatic	-3.1758	LVOC	308.393	183.885	57240.3	0.0391826	132839	0.0475281	261445	0.0714646
385.114	C17H22O10	O10	CHO	17	22	10	0	0	7	-3	0.588235	1.29412	-0.219156	386.121	-0.117647	0.166667	High O unsaturated	-4.24632	ELVOC	338.699	187.201	110424	0.0755885	207850	0.0743661	261336	0.0714349
201.019	C11H6O4	O4	CHO	11	6	4	0	0	9	5	0.363636	0.545455	-0.0415383	202.027	0.181818	0.777778	Condensed aromatic	1.90837	SVOC	260.865	175.281	171735	0.117558	261317	0.0934961	183677	0.0502072
312.051	C16H11NO6	NO6	CHNO	16	11	6	1	0	12	6	0.375	0.6875	-0.145649	313.059	-0.25	0.666667	Aromatic	-2.39885	LVOC	NA	NA	59889	0.0409958	149352	0.0534363	260738	0.0712712
313.02	C12H10O10	O10	CHO	12	10	10	0	0	8	-2	0.833333	0.833333	0.0896109	314.027	0.833333	0.428571	High O unsaturated	-4.23818	ELVOC	321.806	179.9	NA	NA	115564	0.0413474	260337	0.0711618
385.041	C15H14O12	O12	CHO	15	14	12	0	0	9	-3	0.8	0.933333	-0.0896008	386.048	0.666667	0.333333	High O unsaturated	-6.94187	ELVOC	338.097	183.743	NA	NA	88936.6	0.0318204	260127	0.0711042
378.083	C17H17NO9	NO9	CHNO	17	17	9	1	0	10	1	0.529412	1	0.138858	379.09	-0.235294	0.391304	High O unsaturated	-4.65762	ELVOC	NA	NA	64485.1	0.044142	134528	0.0481324	260003	0.0710704
207.015	C6H8O8	O8	CHO	6	8	8	0	0	3	-5	1.33333	1.33333	-0.0499965	208.022	1.33333	0	Aliphatic	-0.784217	LVOC	302.531	175.059	NA	NA	138720	0.0496322	259943	0.0710541
341.124	C16H22O8	O8	CHO	16	22	8	0	0	6	-2	0.5	1.375	-0.197142	342.131	-0.375	0.166667	High O unsaturated	-1.80727	LVOC	325.927	186.099	178175	0.121966	232840	0.0833074	259857	0.0710304
194.046	C9H9NO4	NO4	CHNO	9	9	4	1	0	6	2	0.444444	1	-0.0355586	195.053	-0.666667	0.5	Low O unsaturated	1.66728	SVOC	NA	NA	177473	0.121486	259826	0.0929625	195933	0.0535571
149.024	C8H6O3	O3	CHO	8	6	3	0	0	6	3	0.375	0.75	-0.0426105	150.032	0	0.692308	Condensed aromatic	4.22336	IVOC	236.173	173.667	241274	0.165159	259757	0.0929379	175900	0.0480814
199.04	C12H8O3	O3	CHO	12	8	3	0	0	9	6	0.25	0.666667	-0.0605406	200.047	-0.166667	0.714286	Condensed aromatic	2.38049	SVOC	248.869	176.481	239978	0.164272	259116	0.0927085	231220	0.0632029
314.067	C16H13NO6	NO6	CHNO	16	13	6	1	0	11	5	0.375	0.8125	0.0815113	315.074	-0.375	0.583333	Aromatic	-2.32365	LVOC	NA	NA	76995.9	0.0527059	176192	0.0630392	258864	0.0707591
281.082	C17H14O4	O4	CHO	17	14	4	0	0	11	7	0.235294	0.823529	0.0478508	282.089	-0.352941	0.6	Aromatic	-0.201131	SVOC	284.217	181.918	154377	0.105676	253413	0.090668	258348	0.0706179
305.046	C18H10O5	O5	CHO	18	10	5	0	0	14	9	0.277778	0.555556	0.0280286	306.053	0	0.741935	Condensed aromatic	-1.9549	LVOC	290.047	180.662	73747.5	0.0504823	168987	0.0604615	258218	0.0705825
307.119	C16H20O6	O6	CHO	16	20	6	0	0	7	1	0.375	1.25	0.0524227	308.126	-0.5	0.307692	Low O unsaturated	-0.281001	SVOC	309.425	184.726	138949	0.0951148	191735	0.0686006	258095	0.070549
302.031	C14H9NO7	NO7	CHNO	14	9	7	1	0	11	4	0.5	0.642857	0.150647	303.038	0	0.684211	Condensed aromatic	-2.3843	LVOC	NA	NA	59645.1	0.0408288	159639	0.0571169	258012	0.0705262
289.108	C16H18O5	O5	CHO	16	18	5	0	0	8	3	0.3125	1.125	0.0788632	290.115	-0.5	0.407407	Low O unsaturated	0.224412	SVOC	298.154	183.606	150321	0.102899	214335	0.0766864	257414	0.0703627
178.015	C8H5NO4	NO4	CHNO	8	5	4	1	0	7	3	0.5	0.625	-0.0404461	179.022	-0.25	0.8	Condensed aromatic	1.9067	SVOC	NA	NA	170380	0.11663	257110	0.0919908	195358	0.0534002
288.999	C13H6O8	O8	CHO	13	6	8	0	0	11	3	0.615385	0.461538	0.0446368	290.006	0.769231	0.777778	Condensed aromatic	-2.8097	LVOC	302.629	177.446	NA	NA	131544	0.0470649	256713	0.0701712
342.083	C14H17NO9	NO9	CHNO	14	17	9	1	0	7	-2	0.642857	1.21429	0.122339	343.09	-0.285714	0.176471	High O unsaturated	-3.51134	LVOC	NA	NA	70561.1	0.0483011	158518	0.0567158	256662	0.0701573
311.008	C9H12O10S	O10S	CHOS	9	12	10	0	1	4	-6	1.11111	1.33333	0.109483	312.015	0.222222	0	Aliphatic	-4.8946	ELVOC	NA	NA	NA	NA	NA	NA	256212	0.0700342
380.062	C16H15NO10	NO10	CHNO	16	15	10	1	0	10	0	0.625	0.9375	-0.0555172	381.07	0	0.4	High O unsaturated	-5.06491	ELVOC	NA	NA	44387	0.0303842	108725	0.0389004	255947	0.0699617
154.015	C6H5NO4	NO4	CHNO	6	5	4	1	0	5	1	0.666667	0.833333	-0.034737	155.022	-0.333333	0.666667	Aromatic	2.67189	IVOC	NA	NA	153275	0.104921	255538	0.0914283	124833	0.0341225
329.018	C9H14O11S	O11S	CHOS	9	14	11	0	1	3	-8	1.22222	1.55556	0.0597231	330.026	0.222222	0	Aliphatic	-5.76921	ELVOC	NA	NA	NA	NA	NA	NA	255409	0.0698147
349.041	C12H14O12	O12	CHO	12	14	12	0	0	6	-6	1	1.16667	0.109156	350.049	0.833333	0	Aliphatic	-6.21607	ELVOC	336.446	182.191	NA	NA	109622	0.0392215	254952	0.0696898
357.025	C17H10O9	O9	CHO	17	10	9	0	0	13	4	0.529412	0.588235	-0.104334	358.032	0.470588	0.68	Condensed aromatic	-4.88315	ELVOC	318.142	181.781	NA	NA	111712	0.0399691	254804	0.0696492
313.023	C9H14O10S	O10S	CHOS	9	14	10	0	1	3	-7	1.11111	1.55556	-0.0054309	314.031	1.11e-16	0	Aliphatic	-4.5932	ELVOC	NA	NA	NA	NA	NA	NA	254670	0.0696128
350.088	C16H17NO8	NO8	CHNO	16	17	8	1	0	9	1	0.5	1.0625	0.0635554	351.095	-0.375	0.363636	High O unsaturated	-3.56397	ELVOC	NA	NA	78925.8	0.054027	163590	0.0585304	254556	0.0695815
157.051	C7H10O4	O4	CHO	7	10	4	0	0	3	-1	0.571429	1.42857	-0.0248328	158.058	-0.285714	0.2	High O unsaturated	4.29184	IVOC	253.809	175.487	211588	0.144838	254460	0.0910425	119084	0.0325511
248.02	C11H7NO6	NO6	CHNO	11	7	6	1	0	9	3	0.545455	0.636364	0.0100798	249.027	-1.11e-16	0.714286	Condensed aromatic	-0.592756	LVOC	NA	NA	99786.9	0.068307	254026	0.0908875	246840	0.0674725
287.008	C7H12O10S	O10S	CHOS	7	12	10	0	1	2	-8	1.42857	1.71429	-0.0984294	288.015	0.285714	0	Aliphatic	-4.34203	ELVOC	NA	NA	NA	NA	NA	NA	252810	0.0691043
213.019	C12H6O4	O4	CHO	12	6	4	0	0	10	6	0.333333	0.5	-0.0694773	214.027	0.166667	0.8	Condensed aromatic	1.39913	SVOC	262.246	175.656	168134	0.115093	252599	0.0903769	200747	0.0548732
397.041	C16H14O12	O12	CHO	16	14	12	0	0	10	-2	0.75	0.875	-0.18323	398.048	0.625	0.4	High O unsaturated	-7.23836	ELVOC	338.574	184.214	NA	NA	72484.7	0.0259341	252516	0.0690239
369.119	C17H22O9	O9	CHO	17	22	9	0	0	7	-2	0.529412	1.29412	0.0396891	370.126	-0.235294	0.2	High O unsaturated	-3.21875	LVOC	333.442	186.901	123987	0.084873	203019	0.0726376	251751	0.0688147
255.124	C13H20O5	O5	CHO	13	20	5	0	0	4	-1	0.384615	1.53846	-0.00313573	256.131	-0.769231	0.142857	Low O unsaturated	2.03226	SVOC	292.492	182.881	250988	0.171808	225262	0.0805958	119734	0.0327286
191.071	C11H12O3	O3	CHO	11	12	3	0	0	6	3	0.272727	1.09091	-0.0405608	192.079	-0.545455	0.473684	Low O unsaturated	3.48544	IVOC	250.391	178.072	204147	0.139744	250959	0.0897901	154062	0.042112
393.119	C19H22O9	O9	CHO	19	22	9	0	0	9	0	0.473684	1.15789	-0.171322	394.126	-0.210526	0.310345	Low O unsaturated	-4.08396	ELVOC	336.132	187.825	79311.3	0.0542909	151384	0.0541635	250795	0.0685535
237.056	C15H10O3	O3	CHO	15	10	3	0	0	11	8	0.2	0.666667	-0.0217249	238.063	-0.266667	0.703704	Condensed aromatic	0.958326	SVOC	259.09	178.719	202026	0.138293	250482	0.0896194	228298	0.062404
362.052	C16H13NO9	NO9	CHNO	16	13	9	1	0	11	2	0.5625	0.8125	0.27717	363.059	0	0.52381	Aromatic	-4.42338	ELVOC	NA	NA	39080.5	0.0267518	117178	0.0419249	250309	0.0684205
373.114	C16H22O10	O10	CHO	16	22	10	0	0	6	-4	0.625	1.375	0.125833	374.121	-0.125	0.0909091	High O unsaturated	-3.8673	ELVOC	337.388	186.704	128845	0.0881982	215014	0.0769295	249339	0.0681555
291.066	C18H12O4	O4	CHO	18	12	4	0	0	13	9	0.222222	0.666667	0.0943084	292.074	-0.222222	0.6875	Condensed aromatic	-1.04282	LVOC	282.989	181.307	107892	0.0738552	211546	0.0756885	248463	0.0679159
284.056	C15H11NO5	NO5	CHNO	15	11	5	1	0	11	6	0.333333	0.733333	-0.0397808	285.064	-0.4	0.652174	Aromatic	-1.31983	LVOC	NA	NA	94016.7	0.0643572	197054	0.0705035	248151	0.0678307
332.041	C15H11NO8	NO8	CHNO	15	11	8	1	0	11	3	0.533333	0.733333	-0.181303	333.048	5.55e-17	0.6	Aromatic	-3.40289	LVOC	NA	NA	44687.5	0.0305899	133441	0.0477435	248011	0.0677926
344.062	C13H15NO10	NO10	CHNO	13	15	10	1	0	7	-3	0.769231	1.15385	-0.273497	345.07	1.67e-16	0.142857	High O unsaturated	-3.941	ELVOC	NA	NA	50598.1	0.0346359	123204	0.0440807	247511	0.0676558
313.129	C15H22O7	O7	CHO	15	22	7	0	0	5	-2	0.466667	1.46667	0.0812763	314.137	-0.533333	0.130435	Low O unsaturated	-0.411819	SVOC	317.112	185.269	214433	0.146786	247426	0.0885259	229442	0.0627168
382.078	C16H17NO10	NO10	CHNO	16	17	10	1	0	9	-1	0.625	1.0625	-0.19852	383.085	-0.125	0.3	High O unsaturated	-4.98971	ELVOC	NA	NA	45803.2	0.0313536	126545	0.0452762	246956	0.067504
145.014	C5H6O5	O5	CHO	5	6	5	0	0	3	-2	1	1.2	-0.0844745	146.022	0.8	0.2	High O unsaturated	3.17153	IVOC	266.14	172.744	141269	0.0967026	190637	0.0682074	246871	0.067481
358.078	C14H17NO10	NO10	CHNO	14	17	10	1	0	7	-3	0.714286	1.21429	0.185434	359.085	-0.142857	0.125	High O unsaturated	-4.23717	ELVOC	NA	NA	50836.4	0.034799	123027	0.0440176	246846	0.0674741
301.024	C8H14O10S	O10S	CHOS	8	14	10	0	1	2	-8	1.25	1.75	0.146998	302.031	0	0	Aliphatic	-4.30255	ELVOC	NA	NA	NA	NA	NA	NA	246795	0.0674599
245.103	C11H18O6	O6	CHO	11	18	6	0	0	3	-3	0.545455	1.63636	-0.000203996	246.11	-0.545455	0	Aliphatic	1.73356	SVOC	296.38	181.469	246696	0.168871	206402	0.0738481	152410	0.0416605
345.013	C9H14O12S	O12S	CHOS	9	14	12	0	1	3	-9	1.33333	1.55556	-0.241585	346.021	0.444444	0	Aliphatic	-6.96218	ELVOC	NA	NA	NA	NA	NA	NA	246357	0.0673404
403.103	C20H20O9	O9	CHO	20	20	9	0	0	11	2	0.45	1	0.0584217	404.111	-0.1	0.419355	Low O unsaturated	-4.81374	ELVOC	335.188	187.536	70961.1	0.048575	147029	0.0526052	246308	0.0673269
285.134	C14H22O6	O6	CHO	14	22	6	0	0	4	-2	0.428571	1.57143	-0.111176	286.142	-0.714286	0.0909091	Low O unsaturated	0.962806	SVOC	306.602	184.41	246179	0.168517	214356	0.0766941	131246	0.0358753
369.098	C20H18O7	O7	CHO	20	18	7	0	0	12	5	0.35	0.9	-0.182743	370.105	-0.2	0.515152	Aromatic	-3.37685	LVOC	321.232	186.048	69373.2	0.047488	150006	0.0536704	245819	0.0671933
279.03	C16H8O5	O5	CHO	16	8	5	0	0	13	8	0.3125	0.5	-0.172383	280.037	0.125	0.777778	Condensed aromatic	-1.16259	LVOC	283.48	178.775	93630.4	0.0640927	175078	0.0626407	245800	0.0671881
391.088	C15H20O12	O12	CHO	15	20	12	0	0	6	-6	0.8	1.33333	0.0291494	392.096	0.266667	0	Aliphatic	-6.10967	ELVOC	344.054	186.049	46805.2	0.0320395	150601	0.0538833	245419	0.067084
331.119	C18H20O6	O6	CHO	18	20	6	0	0	9	3	0.333333	1.11111	0.0436399	332.126	-0.444444	0.4	Low O unsaturated	-1.29427	LVOC	313.195	185.616	113627	0.0777807	177497	0.0635063	245218	0.0670289
344.078	C17H15NO7	NO7	CHNO	17	15	7	1	0	11	4	0.411765	0.882353	0.251106	345.085	-0.352941	0.52	Aromatic	-3.33192	LVOC	NA	NA	73209.5	0.0501141	164598	0.058891	245186	0.0670202
373.008	C10H14O13S	O13S	CHOS	10	14	13	0	1	4	-9	1.3	1.4	-0.297178	374.015	0.6	0	Aliphatic	-8.4257	ELVOC	NA	NA	NA	NA	NA	NA	244854	0.0669296
271.013	C7H12O9S	O9S	CHOS	7	12	9	0	1	2	-7	1.28571	1.71429	-0.0625431	272.02	3.33e-16	0	Aliphatic	-3.13845	LVOC	NA	NA	NA	NA	NA	NA	244786	0.066911
185.009	C7H6O6	O6	CHO	7	6	6	0	0	5	-1	0.857143	0.857143	-0.0654022	186.016	0.857143	0.5	High O unsaturated	1.44468	SVOC	282.69	174.14	95377.8	0.0652888	194101	0.0694469	244646	0.0668726
327.003	C9H12O11S	O11S	CHOS	9	12	11	0	1	4	-7	1.22222	1.33333	-0.0379202	328.01	0.444444	0	Aliphatic	-6.07061	ELVOC	NA	NA	NA	NA	NA	NA	244220	0.0667562
244.025	C12H7NO5	NO5	CHNO	12	7	5	1	0	10	5	0.416667	0.583333	-0.143223	245.032	-0.166667	0.764706	Condensed aromatic	-0.280326	SVOC	NA	NA	104965	0.0718515	224583	0.0803529	243914	0.0666726
401.088	C20H18O9	O9	CHO	20	18	9	0	0	12	3	0.45	0.9	0.160813	402.095	0	0.483871	Low O unsaturated	-5.09114	ELVOC	332.773	186.756	NA	NA	139759	0.0500039	243708	0.0666163
226.036	C9H9NO6	NO6	CHNO	9	9	6	1	0	6	0	0.666667	1	-0.0966661	227.043	-0.222222	0.4	High O unsaturated	0.243948	SVOC	NA	NA	132894	0.0909695	233844	0.0836663	243696	0.066613
349.129	C18H22O7	O7	CHO	18	22	7	0	0	8	1	0.388889	1.22222	0.187466	350.137	-0.444444	0.310345	Low O unsaturated	-1.82394	LVOC	322.638	186.697	114668	0.0784936	174852	0.0625598	243239	0.066488
401.04	C12H18O13S	O13S	CHOS	12	18	13	0	1	4	-9	1.08333	1.5	-0.0334132	402.047	0.166667	0	Aliphatic	-8.40166	ELVOC	NA	NA	NA	NA	NA	NA	242952	0.0664097
338.088	C15H17NO8	NO8	CHNO	15	17	8	1	0	8	0	0.533333	1.13333	0.0233667	339.095	-0.4	0.3	High O unsaturated	-3.17729	LVOC	NA	NA	86986.5	0.0595448	168651	0.0603414	242832	0.0663768
304.083	C15H15NO6	NO6	CHNO	15	15	6	1	0	9	3	0.4	1	0.151439	305.09	-0.533333	0.454545	Low O unsaturated	-1.85285	LVOC	NA	NA	116665	0.0798604	188265	0.0673588	242824	0.0663746
387.108	C20H20O8	O8	CHO	20	20	8	0	0	11	3	0.4	1	-0.364368	388.116	-0.2	0.4375	Low O unsaturated	-3.92525	ELVOC	329.779	187.195	75721.8	0.0518338	133987	0.047939	242717	0.0663454
341.103	C19H18O6	O6	CHO	19	18	6	0	0	11	5	0.315789	0.947368	0.175607	342.11	-0.315789	0.5	Low O unsaturated	-2.09237	LVOC	312.628	185.263	95373.4	0.0652859	175574	0.0628182	242695	0.0663395
301.108	C17H18O5	O5	CHO	17	18	5	0	0	9	4	0.294118	1.05882	-0.112916	302.115	-0.470588	0.448276	Low O unsaturated	-0.306401	SVOC	300.226	184.037	130952	0.0896405	203224	0.0727111	242588	0.06631
381.062	C20H14O8	O8	CHO	20	14	8	0	0	14	6	0.4	0.7	0.156799	382.069	0.1	0.625	Aromatic	-4.75745	ELVOC	321.604	184.652	48044.9	0.0328882	112596	0.0402855	242331	0.0662398
377.124	C19H22O8	O8	CHO	19	22	8	0	0	9	1	0.421053	1.15789	-0.196089	378.131	-0.315789	0.333333	Low O unsaturated	-3.16952	LVOC	330.575	187.492	96464.9	0.066033	153883	0.0550576	242196	0.066203
355.034	C11H16O11S	O11S	CHOS	11	16	11	0	1	4	-7	1	1.45455	0.0454886	356.041	0	0	Aliphatic	-6.07816	ELVOC	NA	NA	NA	NA	NA	NA	242173	0.0661968
354.047	C14H13NO10	NO10	CHNO	14	13	10	1	0	9	-1	0.714286	0.928571	0.379752	355.054	0.142857	0.375	High O unsaturated	-4.38757	ELVOC	NA	NA	39876.1	0.0272964	109481	0.0391708	242002	0.0661498
329.124	C15H22O8	O8	CHO	15	22	8	0	0	5	-3	0.533333	1.46667	0.0142803	330.131	-0.4	0.0909091	High O unsaturated	-1.38271	LVOC	324.181	185.594	190218	0.13021	241549	0.0864232	234571	0.0641186
307.031	C10H12O11	O11	CHO	10	12	11	0	0	5	-6	1.1	1.2	-0.246555	308.038	1	0	Aliphatic	-4.82013	ELVOC	328.407	179.988	NA	NA	109334	0.0391185	241498	0.0660122
294.025	C12H9NO8	NO8	CHNO	12	9	8	1	0	9	1	0.666667	0.75	-0.329563	295.033	0.166667	0.571429	Aromatic	-2.33439	LVOC	NA	NA	NA	NA	139149	0.0497858	241139	0.065914
387.024	C11H16O13S	O13S	CHOS	11	16	13	0	1	4	-9	1.18182	1.45455	-0.230218	388.031	0.363636	0	Aliphatic	-8.40346	ELVOC	NA	NA	NA	NA	NA	NA	240351	0.0656986
260.02	C12H7NO6	NO6	CHNO	12	7	6	1	0	10	4	0.5	0.583333	-0.179986	261.027	0	0.75	Condensed aromatic	-0.979032	LVOC	NA	NA	69578.9	0.0476288	185610	0.0664091	240207	0.0656593
423.057	C18H16O12	O12	CHO	18	16	12	0	0	11	-1	0.666667	0.888889	0.143952	424.064	0.444444	0.416667	High O unsaturated	-7.61939	ELVOC	342.202	185.981	NA	NA	100477	0.0359496	240159	0.0656462
243.018	C6H12O8S	O8S	CHOS	6	12	8	0	1	1	-7	1.33333	2	-0.0337424	244.025	-0.333333	0	Aliphatic	-1.67461	LVOC	NA	NA	NA	NA	NA	NA	240007	0.0656046
230.046	C12H9NO4	NO4	CHNO	12	9	4	1	0	9	5	0.333333	0.75	-0.0310808	231.053	-0.5	0.666667	Aromatic	0.479768	SVOC	NA	NA	168076	0.115053	239945	0.0858494	201252	0.0550112
141.019	C6H6O4	O4	CHO	6	6	4	0	0	4	0	0.666667	1	-0.0475112	142.027	0.333333	0.5	High O unsaturated	4.11089	IVOC	251.245	173.027	186070	0.127371	239738	0.0857753	166559	0.045528
176.035	C9H7NO3	NO3	CHNO	9	7	3	1	0	7	4	0.333333	0.777778	-0.0349362	177.043	-0.666667	0.692308	Condensed aromatic	2.27937	SVOC	NA	NA	208770	0.142909	239031	0.0855225	176930	0.0483629
409.114	C19H22O10	O10	CHO	19	22	10	0	0	9	-1	0.526316	1.15789	0.0354424	410.121	-0.105263	0.285714	High O unsaturated	-5.05499	ELVOC	341.102	188.138	72244.2	0.0494532	146623	0.0524599	238800	0.0652746
351.057	C12H16O12	O12	CHO	12	16	12	0	0	5	-7	1	1.33333	0.199968	352.064	0.666667	0	Aliphatic	-5.93867	ELVOC	338.032	182.966	NA	NA	90123.8	0.0322452	238770	0.0652666
267.018	C8H12O8S	O8S	CHOS	8	12	8	0	1	3	-5	1	1.5	0.0346419	268.025	-0.25	0	Aliphatic	-2.26706	LVOC	NA	NA	NA	NA	NA	NA	238671	0.0652394
376.068	C17H15NO9	NO9	CHNO	17	15	9	1	0	11	2	0.529412	0.882353	0.254875	377.075	-0.117647	0.478261	High O unsaturated	-4.73282	ELVOC	NA	NA	46142.6	0.031586	125734	0.0449859	238574	0.065213
365.124	C18H22O8	O8	CHO	18	22	8	0	0	8	0	0.444444	1.22222	-0.0983227	366.131	-0.333333	0.285714	Low O unsaturated	-2.70238	LVOC	329.113	187.046	95645.4	0.065472	172930	0.0618722	238323	0.0651443
242.046	C13H9NO4	NO4	CHNO	13	9	4	1	0	10	6	0.307692	0.692308	-0.031399	243.053	-0.461538	0.7	Condensed aromatic	0.0796798	SVOC	NA	NA	134710	0.0922132	213147	0.0762613	237860	0.0650176
399.024	C12H16O13S	O13S	CHOS	12	16	13	0	1	5	-8	1.08333	1.33333	-0.275798	400.031	0.333333	0	Aliphatic	-8.70306	ELVOC	NA	NA	NA	NA	NA	NA	237820	0.0650068
225.007	C6H10O7S	O7S	CHOS	6	10	7	0	1	2	-5	1.16667	1.66667	-0.0704421	226.015	-0.333333	0	Aliphatic	-0.787172	LVOC	NA	NA	NA	NA	NA	NA	237677	0.0649677
305.088	C12H18O9	O9	CHO	12	18	9	0	0	4	-5	0.75	1.5	0.0591633	306.095	0	0	Aliphatic	-1.92919	LVOC	322.637	182.93	121935	0.0834678	200120	0.0716005	237644	0.0649586
242.031	C9H9NO7	NO7	CHNO	9	9	7	1	0	6	-1	0.777778	1	-0.254926	243.038	0	0.333333	High O unsaturated	-0.486007	SVOC	NA	NA	71345.5	0.048838	147216	0.0526721	237541	0.0649307
397.114	C18H22O10	O10	CHO	18	22	10	0	0	8	-2	0.555556	1.22222	-0.0662278	398.121	-0.111111	0.230769	High O unsaturated	-4.64282	ELVOC	339.934	187.679	88754.5	0.060755	166140	0.0594428	237456	0.0649074
328.046	C16H11NO7	NO7	CHNO	16	11	7	1	0	12	5	0.4375	0.6875	0.172689	329.054	-0.125	0.652174	Aromatic	-3.08926	LVOC	NA	NA	55991.7	0.0383279	138558	0.0495743	237417	0.0648966
417.067	C16H18O13	O13	CHO	16	18	13	0	0	8	-5	0.8125	1.125	-0.0184622	418.075	0.5	0.157895	High O unsaturated	-7.8768	ELVOC	347.233	186.096	NA	NA	126387	0.0452196	237111	0.0648131
300.036	C11H11NO9	NO9	CHNO	11	11	9	1	0	7	-2	0.818182	1	0.0359957	301.043	0.181818	0.272727	High O unsaturated	-2.61927	LVOC	NA	NA	NA	NA	126661	0.0453179	236952	0.0647696
253.002	C7H10O8S	O8S	CHOS	7	10	8	0	1	3	-5	1.14286	1.42857	-0.0648215	254.01	-1.11e-16	0	Aliphatic	-2.25633	LVOC	NA	NA	NA	NA	NA	NA	236879	0.0647497
293.082	C18H14O4	O4	CHO	18	14	4	0	0	12	8	0.222222	0.777778	0.0274667	294.089	-0.333333	0.625	Aromatic	-0.765419	LVOC	286.171	182.291	110572	0.0756899	193330	0.0691712	236568	0.0646647
342.062	C17H13NO7	NO7	CHNO	17	13	7	1	0	12	5	0.411765	0.764706	-0.12907	343.069	-0.235294	0.6	Aromatic	-3.40712	LVOC	NA	NA	54498	0.0373055	142462	0.0509711	236527	0.0646535
244.046	C9H11NO7	NO7	CHNO	9	11	7	1	0	5	-2	0.777778	1.22222	-0.140137	245.054	-0.222222	0.111111	High O unsaturated	-0.410807	SVOC	NA	NA	86084.9	0.0589276	176027	0.0629804	236362	0.0646083
301.129	C14H22O7	O7	CHO	14	22	7	0	0	4	-3	0.5	1.57143	-0.00116229	302.137	-0.571429	0.047619	High O unsaturated	0.029726	SVOC	315.021	184.75	235320	0.161084	206340	0.0738259	154855	0.0423289
298.036	C15H9NO6	NO6	CHNO	15	9	6	1	0	12	6	0.4	0.6	-0.0275135	299.043	-0.133333	0.727273	Condensed aromatic	-2.07845	LVOC	NA	NA	62857.6	0.0430279	154873	0.0554118	235128	0.064271
383.029	C12H16O12S	O12S	CHOS	12	16	12	0	1	5	-7	1	1.33333	0.254811	384.036	0.166667	0	Aliphatic	-7.54946	ELVOC	NA	NA	NA	NA	NA	NA	234275	0.0640378
315.003	C8H12O11S	O11S	CHOS	8	12	11	0	1	3	-8	1.375	1.5	-0.337934	316.01	0.5	0	Aliphatic	-5.8017	ELVOC	NA	NA	NA	NA	NA	NA	234140	0.0640009
369.013	C11H14O12S	O12S	CHOS	11	14	12	0	1	5	-7	1.09091	1.27273	0.27438	370.021	0.363636	0	Aliphatic	-7.53389	ELVOC	NA	NA	NA	NA	NA	NA	233891	0.0639328
437.109	C20H22O11	O11	CHO	20	22	11	0	0	10	-1	0.55	1.1	-0.131889	438.116	0	0.310345	High O unsaturated	-6.47718	ELVOC	346.588	188.882	53237	0.0364423	121978	0.0436421	233812	0.0639114
351.087	C20H16O6	O6	CHO	20	16	6	0	0	13	7	0.3	0.8	-0.110799	352.095	-0.2	0.588235	Aromatic	-2.8984	LVOC	311.453	184.808	61867	0.0423498	140104	0.0501275	233748	0.0638937
323.093	C19H16O5	O5	CHO	19	16	5	0	0	12	7	0.263158	0.842105	0.165123	324.1	-0.315789	0.575758	Aromatic	-1.66867	LVOC	301.458	184.012	78468.4	0.0537139	148299	0.0530594	233533	0.063835
401.109	C17H22O11	O11	CHO	17	22	11	0	0	7	-4	0.647059	1.29412	0.261899	402.116	0	0.130435	High O unsaturated	-5.32442	ELVOC	343.453	187.484	86919.7	0.059499	187616	0.0671267	233505	0.0638273
425.109	C19H22O11	O11	CHO	19	22	11	0	0	9	-2	0.578947	1.15789	-0.0090565	426.116	0	0.259259	High O unsaturated	-6.07695	ELVOC	345.598	188.433	69842.7	0.0478093	132198	0.0472989	233420	0.063804
323.02	C17H8O7	O7	CHO	17	8	7	0	0	14	7	0.411765	0.470588	0.0430314	324.027	0.352941	0.777778	Condensed aromatic	-3.28227	LVOC	301.274	179.899	NA	NA	121506	0.0434734	233310	0.0637742
343.034	C10H16O11S	O11S	CHOS	10	16	11	0	1	3	-8	1.1	1.6	0.106549	344.041	0	0	Aliphatic	-5.76205	ELVOC	NA	NA	NA	NA	NA	NA	232938	0.0636723
337.129	C17H22O7	O7	CHO	17	22	7	0	0	7	0	0.411765	1.29412	-0.131997	338.136	-0.470588	0.259259	Low O unsaturated	-1.34047	LVOC	320.905	186.241	122036	0.0835369	185246	0.0662787	232848	0.0636476
342.047	C13H13NO10	NO10	CHNO	13	13	10	1	0	8	-2	0.769231	1	0.000877073	343.054	0.153846	0.285714	High O unsaturated	-4.0162	ELVOC	NA	NA	NA	NA	94881.8	0.0339475	232556	0.0635678
433.078	C20H18O11	O11	CHO	20	18	11	0	0	12	1	0.55	0.9	-0.110719	434.085	0.2	0.448276	High O unsaturated	-7.03198	ELVOC	341.989	187.381	NA	NA	100501	0.0359579	232504	0.0635538
224.056	C10H11NO5	NO5	CHNO	10	11	5	1	0	6	1	0.5	1.1	-0.00981895	225.064	-0.6	0.384615	High O unsaturated	0.651835	SVOC	NA	NA	176943	0.121123	232157	0.0830629	213169	0.0582687
312.036	C12H11NO9	NO9	CHNO	12	11	9	1	0	8	-1	0.75	0.916667	0.0136202	313.043	0.166667	0.384615	High O unsaturated	-2.98789	LVOC	NA	NA	NA	NA	122592	0.0438617	232134	0.0634526
361.129	C19H22O7	O7	CHO	19	22	7	0	0	9	2	0.368421	1.15789	-0.345306	362.136	-0.421053	0.354839	Low O unsaturated	-2.3182	LVOC	324.276	187.136	92405.1	0.063254	153924	0.055072	231510	0.0632821
325.023	C10H14O10S	O10S	CHOS	10	14	10	0	1	4	-6	1	1.4	-0.075533	326.031	0	0	Aliphatic	-4.90826	ELVOC	NA	NA	NA	NA	NA	NA	230994	0.0631409
362.088	C17H17NO8	NO8	CHNO	17	17	8	1	0	10	2	0.470588	1	-0.148859	363.095	-0.352941	0.416667	Low O unsaturated	-3.95282	ELVOC	NA	NA	66725	0.0456752	142800	0.0510921	230773	0.0630805
296.056	C16H11NO5	NO5	CHNO	16	11	5	1	0	12	7	0.3125	0.6875	-0.213304	297.064	-0.375	0.68	Condensed aromatic	-1.71976	LVOC	NA	NA	77057.5	0.0527481	147873	0.0529072	230509	0.0630083
349.035	C19H10O7	O7	CHO	19	10	7	0	0	15	8	0.368421	0.526316	0.202272	350.043	0.210526	0.741935	Condensed aromatic	-3.9826	ELVOC	307.08	181.811	NA	NA	87452.4	0.0312894	229304	0.0626791
175.061	C7H12O5	O5	CHO	7	12	5	0	0	2	-3	0.714286	1.71429	-0.0339881	176.068	-0.285714	0	Aliphatic	3.47213	IVOC	269.81	176.6	228844	0.156651	206902	0.0740271	159737	0.0436631
274.072	C14H13NO5	NO5	CHNO	14	13	5	1	0	9	4	0.357143	0.928571	-0.248292	275.079	-0.571429	0.52381	Aromatic	-0.846179	LVOC	NA	NA	116826	0.0799707	206334	0.0738239	228652	0.0625008
326.088	C14H17NO8	NO8	CHNO	14	17	8	1	0	7	-1	0.571429	1.21429	-0.189213	327.095	-0.428571	0.222222	High O unsaturated	-2.79309	LVOC	NA	NA	76149.8	0.0521267	152547	0.0545793	228508	0.0624615
284.078	C12H15NO7	NO7	CHNO	12	15	7	1	0	6	-1	0.583333	1.25	-0.116869	285.085	-0.5	0.2	High O unsaturated	-1.38857	LVOC	NA	NA	115242	0.0788868	181467	0.0649266	228257	0.0623928
383.041	C19H12O9	O9	CHO	19	12	9	0	0	14	5	0.473684	0.631579	0.30545	384.048	0.315789	0.655172	Aromatic	-5.47096	ELVOC	322.912	183.622	NA	NA	86294	0.0308749	227504	0.0621869
359.029	C10H16O12S	O12S	CHOS	10	16	12	0	1	3	-9	1.2	1.6	-0.0104448	360.036	0.2	0	Aliphatic	-6.93532	ELVOC	NA	NA	NA	NA	NA	NA	227485	0.0621817
347.056	C20H12O6	O6	CHO	20	12	6	0	0	15	9	0.3	0.6	0.156603	348.063	0	0.705882	Condensed aromatic	-3.4532	LVOC	304.86	182.872	52153.7	0.0357007	120631	0.0431603	227481	0.0621807
415.067	C20H16O10	O10	CHO	20	16	10	0	0	13	3	0.5	0.8	0.216471	416.074	0.2	0.533333	Aromatic	-6.31347	ELVOC	334.912	186.237	NA	NA	91319.8	0.0326731	227447	0.0621715
159.045	C10H8O2	O2	CHO	10	8	2	0	0	7	5	0.2	0.8	-0.0336382	160.052	-0.4	0.666667	Aromatic	4.10293	IVOC	218.091	175.279	227011	0.155395	206385	0.0738419	147952	0.0404419
277.108	C15H18O5	O5	CHO	15	18	5	0	0	7	2	0.333333	1.2	-0.0765044	278.115	-0.533333	0.36	Low O unsaturated	0.745926	SVOC	295.949	183.157	156429	0.10708	213679	0.0764516	226998	0.0620488
451.088	C20H20O12	O12	CHO	20	20	12	0	0	11	-1	0.6	1	-0.0481059	452.095	0.2	0.357143	High O unsaturated	-7.79667	ELVOC	348.399	188.444	NA	NA	111388	0.0398532	226704	0.0619684
333.077	C20H14O5	O5	CHO	20	14	5	0	0	14	9	0.25	0.7	0.0129099	334.084	-0.2	0.657143	Aromatic	-2.49827	LVOC	300.02	183.457	50098.5	0.0342939	135297	0.0484078	226621	0.0619458
413.109	C18H22O11	O11	CHO	18	22	11	0	0	8	-3	0.611111	1.22222	-0.116676	414.116	0	0.2	High O unsaturated	-5.69215	ELVOC	344.556	187.968	72027.7	0.049305	152063	0.0544062	226380	0.0618797
262.072	C13H13NO5	NO5	CHNO	13	13	5	1	0	8	3	0.384615	1	-0.0394929	263.079	-0.615385	0.473684	Low O unsaturated	-0.449443	SVOC	NA	NA	139283	0.0953433	226359	0.0809883	198399	0.0542313
358.057	C17H13NO8	NO8	CHNO	17	13	8	1	0	12	4	0.470588	0.764706	-0.247028	359.064	-0.117647	0.583333	Aromatic	-4.10322	ELVOC	NA	NA	51082.3	0.0349673	117203	0.0419336	226167	0.0618215
295.119	C15H20O6	O6	CHO	15	20	6	0	0	6	0	0.4	1.33333	-0.0555709	296.126	-0.533333	0.25	Low O unsaturated	0.208897	SVOC	307.36	184.253	174539	0.119477	221878	0.0793854	226149	0.0618165
326.067	C17H13NO6	NO6	CHNO	17	13	6	1	0	12	6	0.352941	0.764706	0.162543	327.074	-0.352941	0.615385	Aromatic	-2.72085	LVOC	NA	NA	61073.1	0.0418063	146624	0.0524601	225967	0.061767
324.036	C13H11NO9	NO9	CHNO	13	11	9	1	0	9	0	0.692308	0.846154	0.108784	325.043	0.153846	0.466667	High O unsaturated	-3.36062	LVOC	NA	NA	NA	NA	122664	0.0438877	225589	0.0616634
292.083	C14H15NO6	NO6	CHNO	14	15	6	1	0	8	2	0.428571	1.07143	0.0831956	293.09	-0.571429	0.4	Low O unsaturated	-1.45907	LVOC	NA	NA	128741	0.0881271	201205	0.0719886	225492	0.061637
279.036	C9H12O10	O10	CHO	9	12	10	0	0	4	-6	1.11111	1.33333	-0.0519647	280.043	0.888889	0	Aliphatic	-3.32268	LVOC	321.523	179.155	NA	NA	111530	0.0399041	224681	0.0614154
390.083	C18H17NO9	NO9	CHNO	18	17	9	1	0	11	2	0.5	0.944444	-0.104465	391.09	-0.222222	0.44	High O unsaturated	-5.04443	ELVOC	NA	NA	46501	0.0318313	121652	0.0435257	224377	0.0613323
222.004	C9H5NO6	NO6	CHNO	9	5	6	1	0	8	2	0.666667	0.555556	-0.00900883	223.012	0.222222	0.8	Condensed aromatic	0.093548	SVOC	NA	NA	85300.6	0.0583907	224234	0.080228	162933	0.0445368
209.082	C11H14O4	O4	CHO	11	14	4	0	0	5	1	0.363636	1.27273	-0.0208052	210.089	-0.545455	0.333333	Low O unsaturated	3.01797	IVOC	269.337	179.304	196208	0.13431	223776	0.0800643	138237	0.0377864
274.057	C10H13NO8	NO8	CHNO	10	13	8	1	0	5	-3	0.8	1.3	0.0742547	275.064	-0.2	0	Aliphatic	-1.43968	LVOC	NA	NA	81738.9	0.0559527	137271	0.0491139	223626	0.0611271
405.119	C20H22O9	O9	CHO	20	22	9	0	0	10	1	0.45	1.1	0.0488745	406.126	-0.2	0.354839	Low O unsaturated	-4.53634	ELVOC	337.372	188.262	73069.9	0.0500185	118448	0.0423792	223418	0.0610702
297.134	C15H22O6	O6	CHO	15	22	6	0	0	5	-1	0.4	1.46667	-0.0450974	298.142	-0.666667	0.166667	Low O unsaturated	0.486297	SVOC	308.952	184.92	189764	0.129899	222820	0.0797222	181701	0.0496671
306.026	C13H9NO8	NO8	CHNO	13	9	8	1	0	10	2	0.615385	0.692308	0.068295	307.033	0.153846	0.625	Aromatic	-2.71251	LVOC	NA	NA	NA	NA	143114	0.0512044	222764	0.0608913
247.009	C8H8O9	O9	CHO	8	8	9	0	0	5	-4	1.125	1	-0.274078	248.017	1.25	0.142857	High O unsaturated	-2.38054	LVOC	312.064	176.518	NA	NA	141362	0.0505774	222604	0.0608477
243.124	C12H20O5	O5	CHO	12	20	5	0	0	3	-2	0.416667	1.66667	-0.0896663	244.131	-0.833333	0.0526316	Low O unsaturated	2.51567	IVOC	289.575	182.346	222144	0.152064	158482	0.0567031	90671.4	0.0247845
419.083	C16H20O13	O13	CHO	16	20	13	0	0	7	-6	0.8125	1.25	0.0613244	420.09	0.375	0.0526316	High O unsaturated	-7.5994	ELVOC	349.14	186.818	NA	NA	115224	0.0412257	222140	0.0607208
441.104	C19H22O12	O12	CHO	19	22	12	0	0	9	-3	0.631579	1.15789	-0.064724	442.111	0.105263	0.230769	High O unsaturated	-7.14492	ELVOC	349.703	188.713	44801.9	0.0306682	128528	0.0459858	221187	0.0604603
325.129	C16H22O7	O7	CHO	16	22	7	0	0	6	-1	0.4375	1.375	0.0496725	326.137	-0.5	0.2	Low O unsaturated	-0.869213	LVOC	319.068	185.765	156787	0.107325	192647	0.0689267	220800	0.0603546
303.109	C13H20O8	O8	CHO	13	20	8	0	0	4	-4	0.615385	1.53846	0.0273829	304.116	-0.307692	0	Aliphatic	-0.867903	LVOC	319.013	183.879	166102	0.113702	220566	0.0789158	202263	0.0552875
228.03	C12H7NO4	NO4	CHNO	12	7	4	1	0	10	6	0.333333	0.583333	-0.0521861	229.037	-0.333333	0.777778	Condensed aromatic	0.404568	SVOC	NA	NA	136062	0.0931387	220223	0.0787931	196688	0.0537636
282.041	C15H9NO5	NO5	CHNO	15	9	5	1	0	12	7	0.333333	0.6	-0.1264	283.048	-0.266667	0.73913	Condensed aromatic	-1.39503	LVOC	NA	NA	73070.7	0.050019	157649	0.056405	220194	0.0601889
405.067	C15H18O13	O13	CHO	15	18	13	0	0	7	-6	0.866667	1.2	-0.0883803	406.075	0.533333	0.0588235	High O unsaturated	-7.61065	ELVOC	346.531	185.585	NA	NA	108638	0.0388693	220175	0.0601838
285.004	C14H6O7	O7	CHO	14	6	7	0	0	12	5	0.5	0.428571	-0.0889461	286.011	0.571429	0.809524	Condensed aromatic	-2.18947	LVOC	295.259	177.498	NA	NA	118249	0.0423079	220172	0.0601829
168.03	C7H7NO4	NO4	CHNO	7	7	4	1	0	5	1	0.571429	1	-0.0732011	169.037	-0.571429	0.5	High O unsaturated	2.36734	SVOC	NA	NA	168887	0.115608	219618	0.0785765	140186	0.0383191
251.071	C16H12O3	O3	CHO	16	12	3	0	0	11	8	0.1875	0.75	-0.0187198	252.079	-0.375	0.655172	Aromatic	0.657147	SVOC	264.579	180.126	165234	0.113108	219592	0.0785674	217453	0.0594396
379.031	C16H12O11	O11	CHO	16	12	11	0	0	11	0	0.6875	0.75	-0.0968259	380.038	0.625	0.52381	Aromatic	-6.36265	ELVOC	331.316	183.012	NA	NA	104975	0.0375587	219522	0.0600052
216.03	C11H7NO4	NO4	CHNO	11	7	4	1	0	9	5	0.363636	0.636364	-0.00925796	217.037	-0.363636	0.75	Condensed aromatic	0.802815	SVOC	NA	NA	146458	0.100254	219301	0.0784633	189232	0.0517257
443.083	C18H20O13	O13	CHO	18	20	13	0	0	9	-4	0.722222	1.11111	-0.0889224	444.09	0.333333	0.217391	High O unsaturated	-8.20093	ELVOC	350.689	187.804	NA	NA	101767	0.0364109	219210	0.0599199
363.051	C20H12O7	O7	CHO	20	12	7	0	0	15	8	0.35	0.6	0.162925	364.058	0.1	0.69697	Condensed aromatic	-4.20905	ELVOC	311.939	183.271	54279.7	0.037156	108151	0.0386951	219037	0.0598726
297.029	C9H14O9S	O9S	CHOS	9	14	9	0	1	3	-6	1	1.55556	-0.00488169	298.036	-0.222222	0	Aliphatic	-3.43696	LVOC	NA	NA	NA	NA	NA	NA	218386	0.0596946
354.062	C18H13NO7	NO7	CHNO	18	13	7	1	0	13	6	0.388889	0.722222	-0.190503	355.069	-0.222222	0.62963	Aromatic	-3.80184	ELVOC	NA	NA	47735.1	0.032676	111665	0.0399524	218202	0.0596444
202.999	C10H4O5	O5	CHO	10	4	5	0	0	9	4	0.5	0.4	-0.024877	204.006	0.6	0.866667	Condensed aromatic	1.20713	SVOC	270.152	173.89	111682	0.0764495	218054	0.0780169	145422	0.0397502
265.108	C14H18O5	O5	CHO	14	18	5	0	0	6	1	0.357143	1.28571	-0.0235753	266.115	-0.571429	0.304348	Low O unsaturated	1.25667	SVOC	293.591	182.688	185260	0.126816	217663	0.0778771	182436	0.0498678
249.062	C9H14O8	O8	CHO	9	14	8	0	0	3	-5	0.888889	1.55556	-0.119448	250.069	0.222222	0	Aliphatic	-0.437145	SVOC	307.804	179.444	99243.9	0.0679353	183979	0.0658254	217514	0.0594562
254.067	C11H13NO6	NO6	CHNO	11	13	6	1	0	6	0	0.545455	1.18182	-0.148976	255.074	-0.545455	0.285714	High O unsaturated	-0.367156	SVOC	NA	NA	142050	0.0972374	207861	0.0743702	216991	0.0593133
421.114	C20H22O10	O10	CHO	20	22	10	0	0	10	0	0.5	1.1	-0.0473743	422.121	-0.1	0.333333	High O unsaturated	-5.48127	ELVOC	342.211	188.581	68676.8	0.0470113	137236	0.0491014	216861	0.0592778
247.098	C14H16O4	O4	CHO	14	16	4	0	0	7	3	0.285714	1.14286	-0.0708222	248.105	-0.571429	0.416667	Low O unsaturated	1.72946	SVOC	279.611	181.53	150883	0.103284	216238	0.0773674	173234	0.0473527
431.083	C17H20O13	O13	CHO	17	20	13	0	0	8	-5	0.764706	1.17647	-0.0193698	432.09	0.352941	0.142857	High O unsaturated	-7.88939	ELVOC	349.937	187.321	NA	NA	112046	0.0400888	216090	0.059067
405.046	C18H14O11	O11	CHO	18	14	11	0	0	12	1	0.611111	0.777778	-0.076411	406.054	0.444444	0.52	Aromatic	-6.80175	ELVOC	335.226	184.82	NA	NA	81280.8	0.0290813	215831	0.0589963
230.993	C11H4O6	O6	CHO	11	4	6	0	0	10	4	0.545455	0.363636	-0.0625559	232.001	0.727273	0.875	Condensed aromatic	-0.208239	SVOC	281.342	174.605	92961.4	0.0636348	215392	0.0770645	210484	0.0575346
319.01	C14H8O9	O9	CHO	14	8	9	0	0	11	2	0.642857	0.571429	-0.171155	320.017	0.714286	0.684211	Condensed aromatic	-3.98743	ELVOC	313.361	179.426	NA	NA	93529.9	0.0334639	215331	0.0588597
232.062	C12H11NO4	NO4	CHNO	12	11	4	1	0	8	4	0.333333	0.916667	-0.097388	233.069	-0.666667	0.555556	Aromatic	0.554968	SVOC	NA	NA	160574	0.109918	215222	0.0770036	189830	0.0518889
333.134	C18H22O6	O6	CHO	18	22	6	0	0	8	2	0.333333	1.22222	-0.339653	334.142	-0.555556	0.333333	Low O unsaturated	-1.01687	LVOC	315.162	186.322	95633.1	0.0654636	133037	0.047599	215129	0.0588044
298.072	C16H13NO5	NO5	CHNO	16	13	5	1	0	11	6	0.3125	0.8125	0.127989	299.079	-0.5	0.6	Aromatic	-1.64456	LVOC	NA	NA	94021.1	0.0643602	188582	0.0674723	214710	0.0586899
229.002	C5H10O8S	O8S	CHOS	5	10	8	0	1	1	-7	1.6	2	-0.136025	230.01	0	0	Aliphatic	-1.73483	LVOC	NA	NA	NA	NA	NA	NA	214651	0.0586738
197.082	C10H14O4	O4	CHO	10	14	4	0	0	4	0	0.4	1.4	-0.0494718	198.089	-0.6	0.25	Low O unsaturated	3.51084	IVOC	266.079	178.786	214444	0.146793	208700	0.0746704	106499	0.0291108
349.02	C15H10O10	O10	CHO	15	10	10	0	0	11	1	0.666667	0.666667	-0.156868	350.027	0.666667	0.6	Aromatic	-5.17227	ELVOC	322.826	181.272	NA	NA	97603.1	0.0349212	214432	0.0586139
356.078	C18H15NO7	NO7	CHNO	18	15	7	1	0	12	5	0.388889	0.833333	-0.159375	357.085	-0.333333	0.555556	Aromatic	-3.72664	ELVOC	NA	NA	54565.7	0.0373518	132378	0.0473634	213978	0.0584898
339.015	C17H8O8	O8	CHO	17	8	8	0	0	14	6	0.470588	0.470588	0.26577	340.022	0.470588	0.769231	Condensed aromatic	-4.18958	ELVOC	307.936	180.252	NA	NA	105287	0.0376704	213933	0.0584775
214.036	C8H9NO6	NO6	CHNO	8	9	6	1	0	5	-1	0.75	1.125	0.00513933	215.043	-0.25	0.25	High O unsaturated	0.617597	SVOC	NA	NA	113596	0.0777595	204005	0.0729906	213380	0.0583262
429.104	C18H22O12	O12	CHO	18	22	12	0	0	8	-4	0.666667	1.22222	0.0675827	430.111	0.111111	0.166667	High O unsaturated	-6.78719	ELVOC	348.775	188.242	58530.5	0.0400658	140151	0.0501442	213336	0.0583142
286.072	C15H13NO5	NO5	CHNO	15	13	5	1	0	10	5	0.333333	0.866667	-0.0797002	287.079	-0.533333	0.565217	Aromatic	-1.24463	LVOC	NA	NA	103114	0.0705846	199764	0.0714732	212962	0.058212
145.029	C9H6O2	O2	CHO	9	6	2	0	0	7	5	0.222222	0.666667	-0.022754	146.037	-0.222222	0.75	Condensed aromatic	4.39725	IVOC	212.354	173.721	212795	0.145664	142468	0.0509731	103507	0.028293
453.104	C20H22O12	O12	CHO	20	22	12	0	0	10	-2	0.6	1.1	-0.0097108	454.111	0.1	0.285714	High O unsaturated	-7.51927	ELVOC	350.584	189.167	43662.5	0.0298883	103006	0.0368544	212743	0.058152
340.046	C17H11NO7	NO7	CHNO	17	11	7	1	0	13	6	0.411765	0.647059	-0.322309	341.053	-0.117647	0.68	Condensed aromatic	-3.48232	LVOC	NA	NA	44531.1	0.0304828	100941	0.0361156	212459	0.0580745
316.083	C16H15NO6	NO6	CHNO	16	15	6	1	0	10	4	0.375	0.9375	-0.103454	317.09	-0.5	0.5	Low O unsaturated	-2.24845	LVOC	NA	NA	80823.6	0.0553261	165349	0.0591599	212448	0.0580715
395.077	C21H16O8	O8	CHO	21	16	8	0	0	14	6	0.380952	0.761905	0.118711	396.085	0	0.588235	Aromatic	-4.96841	ELVOC	325.649	185.949	NA	NA	103100	0.0368878	212131	0.0579848
269.139	C14H22O5	O5	CHO	14	22	5	0	0	4	-1	0.357143	1.57143	-0.0278666	270.147	-0.857143	0.130435	Low O unsaturated	1.81147	SVOC	296.643	184.043	211698	0.144913	177099	0.063364	92188.3	0.0251992
328.083	C17H15NO6	NO6	CHNO	17	15	6	1	0	11	5	0.352941	0.882353	0.109424	329.09	-0.470588	0.538462	Aromatic	-2.64565	LVOC	NA	NA	72368.1	0.0495381	156465	0.0559813	211639	0.0578503
401.051	C19H14O10	O10	CHO	19	14	10	0	0	13	3	0.526316	0.736842	-0.0746787	402.059	0.315789	0.571429	Aromatic	-6.16459	ELVOC	331.245	184.931	NA	NA	98537.9	0.0352556	211594	0.057838
345.119	C15H22O9	O9	CHO	15	22	9	0	0	5	-4	0.6	1.46667	-0.0643256	346.126	-0.266667	0.047619	High O unsaturated	-2.41727	LVOC	330.416	185.899	149980	0.102666	211045	0.0755093	201759	0.0551498
429.067	C17H18O13	O13	CHO	17	18	13	0	0	9	-4	0.764706	1.05882	-0.0660735	430.075	0.470588	0.238095	High O unsaturated	-8.16679	ELVOC	347.893	186.585	NA	NA	88981.9	0.0318366	210725	0.0576006
228.051	C9H11NO6	NO6	CHNO	9	11	6	1	0	5	-1	0.666667	1.22222	0.0184169	229.059	-0.444444	0.2	High O unsaturated	0.319148	SVOC	NA	NA	140609	0.0962509	200089	0.0715895	210634	0.0575757
271.098	C16H16O4	O4	CHO	16	16	4	0	0	9	5	0.25	1	0.0743275	272.105	-0.5	0.5	Low O unsaturated	0.634606	SVOC	284.561	182.393	143588	0.0982899	210564	0.0753372	201149	0.0549831
330.047	C12H13NO10	NO10	CHNO	12	13	10	1	0	7	-3	0.833333	1.08333	-0.346769	331.054	0.166667	0.166667	High O unsaturated	-3.6487	ELVOC	NA	NA	NA	NA	95289.3	0.0340933	210457	0.0575272
307.025	C17H8O6	O6	CHO	17	8	6	0	0	14	8	0.352941	0.470588	-0.274408	308.032	0.235294	0.785714	Condensed aromatic	-2.44694	LVOC	293.584	179.519	NA	NA	127697	0.0456884	210402	0.0575123
344.041	C16H11NO8	NO8	CHNO	16	11	8	1	0	12	4	0.5	0.6875	0.107981	345.049	0	0.636364	Aromatic	-3.78957	ELVOC	NA	NA	40577.4	0.0277764	116326	0.0416199	210276	0.0574778
389.124	C20H22O8	O8	CHO	20	22	8	0	0	10	2	0.4	1.1	0.220238	390.132	-0.3	0.375	Low O unsaturated	-3.64785	ELVOC	331.963	187.922	77527.6	0.0530699	137196	0.0490869	210173	0.0574496
433.114	C21H22O10	O10	CHO	21	22	10	0	0	11	1	0.47619	1.04762	0.0386734	434.121	-0.0952381	0.375	Low O unsaturated	-5.9203	ELVOC	343.265	189.008	48812.5	0.0334136	110475	0.0395266	210087	0.0574263
385.045	C12H18O12S	O12S	CHOS	12	18	12	0	1	4	-8	1	1.5	-0.216079	386.052	0	0	Aliphatic	-7.24806	ELVOC	NA	NA	NA	NA	NA	NA	209968	0.0573937
397.093	C21H18O8	O8	CHO	21	18	8	0	0	13	5	0.380952	0.857143	-0.0775637	398.1	-0.0952381	0.529412	Aromatic	-4.69101	ELVOC	328.472	186.806	57642.3	0.0394579	105831	0.037865	209557	0.0572814
220.062	C11H11NO4	NO4	CHNO	11	11	4	1	0	7	3	0.363636	1	-0.0556662	221.069	-0.727273	0.5	Low O unsaturated	0.953215	SVOC	NA	NA	158643	0.108596	209385	0.0749154	163266	0.0446279
417.034	C12H18O14S	O14S	CHOS	12	18	14	0	1	4	-10	1.16667	1.5	-0.0750538	418.042	0.333333	0	Aliphatic	-9.57068	ELVOC	NA	NA	NA	NA	NA	NA	209372	0.0572307
397.057	C20H14O9	O9	CHO	20	14	9	0	0	14	5	0.45	0.7	0.171386	398.064	0.2	0.612903	Aromatic	-5.64594	ELVOC	327.014	184.997	NA	NA	90642.2	0.0324307	209206	0.0571852
335.093	C20H16O5	O5	CHO	20	16	5	0	0	13	8	0.25	0.8	0.120415	336.1	-0.3	0.6	Aromatic	-2.22087	LVOC	303.08	184.382	73456.9	0.0502833	139076	0.0497595	209152	0.0571705
296.992	C8H10O10S	O10S	CHOS	8	10	10	0	1	4	-6	1.25	1.25	0.130138	298	0.5	0	Aliphatic	-4.90535	ELVOC	NA	NA	NA	NA	NA	NA	208927	0.0571091
258.062	C10H13NO7	NO7	CHNO	10	13	7	1	0	5	-2	0.7	1.3	-0.147833	259.069	-0.4	0.0909091	High O unsaturated	-0.707208	LVOC	NA	NA	90031	0.0616288	161296	0.0577095	208829	0.0570823
179.071	C10H12O3	O3	CHO	10	12	3	0	0	5	2	0.3	1.2	0.00725968	180.079	-0.6	0.411765	Low O unsaturated	4.02426	IVOC	246.782	177.593	169817	0.116245	208435	0.0745755	110869	0.0303055
417.104	C17H22O12	O12	CHO	17	22	12	0	0	7	-5	0.705882	1.29412	0.108966	418.111	0.117647	0.0909091	High O unsaturated	-6.44782	ELVOC	347.794	187.752	56151.2	0.0384371	151759	0.0542976	208341	0.0569488
300.999	C14H6O8	O8	CHO	14	6	8	0	0	12	4	0.571429	0.428571	0.0147841	302.006	0.714286	0.8	Condensed aromatic	-3.19546	LVOC	302.553	177.828	NA	NA	127997	0.0457958	208132	0.0568918
253.108	C13H18O5	O5	CHO	13	18	5	0	0	5	0	0.384615	1.38462	-0.0274586	254.115	-0.615385	0.238095	Low O unsaturated	1.75486	SVOC	291.058	182.196	207583	0.142097	206728	0.0739646	149835	0.0409567
269.009	C14H6O6	O6	CHO	14	6	6	0	0	12	6	0.428571	0.428571	0.0438647	270.016	0.428571	0.818182	Condensed aromatic	-1.25639	LVOC	286.839	177.144	64989.4	0.0444871	145457	0.0520429	207334	0.0566735
324.051	C17H11NO6	NO6	CHNO	17	11	6	1	0	13	7	0.352941	0.647059	0.170806	325.059	-0.235294	0.692308	Condensed aromatic	-2.79605	LVOC	NA	NA	49954.5	0.0341953	137618	0.0492381	207278	0.0566583
174.988	C5H4O7	O7	CHO	5	4	7	0	0	4	-3	1.4	0.8	-0.0314306	175.996	2	0.333333	High O unsaturated	0.140126	SVOC	295.819	172.143	NA	NA	207154	0.0741172	203611	0.0556561
415.103	C21H20O9	O9	CHO	21	20	9	0	0	12	3	0.428571	0.952381	-0.110454	416.111	-0.0952381	0.454545	Low O unsaturated	-5.27755	ELVOC	336.267	187.946	49945.3	0.034189	111587	0.0399245	207134	0.0566191
374.088	C18H17NO8	NO8	CHNO	18	17	8	1	0	11	3	0.444444	0.944444	0.314899	375.096	-0.333333	0.461538	Low O unsaturated	-4.3436	ELVOC	NA	NA	56797	0.0388792	117014	0.0418661	206622	0.0564789
218.994	C10H4O6	O6	CHO	10	4	6	0	0	9	3	0.6	0.4	-0.0328777	220.001	0.8	0.857143	Condensed aromatic	0.188126	SVOC	281.606	174.225	82862.2	0.0567216	206574	0.0739095	196113	0.0536065
207.051	C7H12O7	O7	CHO	7	12	7	0	0	2	-5	1	1.71429	-0.0782416	208.058	0.285714	0	Aliphatic	1.00453	SVOC	293.875	177.146	72723.7	0.0497815	105621	0.0377899	206288	0.0563876
338.067	C18H13NO6	NO6	CHNO	18	13	6	1	0	13	7	0.333333	0.722222	-0.190495	339.074	-0.333333	0.642857	Aromatic	-3.11943	LVOC	NA	NA	56235.2	0.0384946	115423	0.0412968	205477	0.0561659
403.055	C12H20O13S	O13S	CHOS	12	20	13	0	1	3	-10	1.08333	1.66667	-0.00421778	404.062	-2.22e-16	0	Aliphatic	-8.10026	ELVOC	NA	NA	NA	NA	NA	NA	205080	0.0560575
346.093	C17H17NO7	NO7	CHNO	17	17	7	1	0	10	3	0.411765	1	-0.191278	347.1	-0.470588	0.44	Low O unsaturated	-3.25672	LVOC	NA	NA	81775.7	0.0559778	140905	0.0504139	204896	0.0560073
272.02	C13H7NO6	NO6	CHNO	13	7	6	1	0	11	5	0.461538	0.538462	0.0860231	273.027	5.55e-17	0.777778	Condensed aromatic	-1.36822	LVOC	NA	NA	57658.8	0.0394691	162134	0.0580097	204695	0.0559523
282.026	C11H9NO8	NO8	CHNO	11	9	8	1	0	8	0	0.727273	0.818182	-0.0838577	283.033	0.181818	0.5	High O unsaturated	-1.96004	LVOC	NA	NA	NA	NA	119565	0.0427788	204416	0.055876
185.061	C12H10O2	O2	CHO	12	10	2	0	0	8	6	0.166667	0.833333	-0.0351236	186.068	-0.5	0.636364	Aromatic	3.21455	IVOC	227.85	177.146	204353	0.139886	182646	0.0653484	139516	0.0381359
386.073	C15H17NO11	NO11	CHNO	15	17	11	1	0	8	-3	0.733333	1.13333	-0.254356	387.08	-5.55e-17	0.176471	High O unsaturated	-5.33986	ELVOC	NA	NA	NA	NA	86032.2	0.0307813	204186	0.0558132
190.015	C9H5NO4	NO4	CHNO	9	5	4	1	0	8	4	0.444444	0.555556	-0.0586797	191.022	-0.222222	0.833333	Condensed aromatic	1.51688	SVOC	NA	NA	151389	0.10363	204091	0.0730212	160212	0.0437932
380.099	C17H19NO9	NO9	CHNO	17	19	9	1	0	9	0	0.529412	1.11765	-0.274665	381.106	-0.352941	0.304348	High O unsaturated	-4.58242	ELVOC	NA	NA	51608.8	0.0353277	128504	0.0459773	204066	0.0557803
244.062	C13H11NO4	NO4	CHNO	13	11	4	1	0	9	5	0.307692	0.846154	-0.0811271	245.069	-0.615385	0.6	Aromatic	0.15488	SVOC	NA	NA	132598	0.0907669	203756	0.0729014	188884	0.0516303
171.045	C11H8O2	O2	CHO	11	8	2	0	0	8	6	0.181818	0.727273	-0.0344938	172.052	-0.363636	0.7	Condensed aromatic	3.52319	IVOC	221.807	175.681	203710	0.139445	160232	0.0573289	123971	0.0338869
291.003	C6H12O11S	O11S	CHOS	6	12	11	0	1	1	-10	1.83333	2	0.109105	292.01	0.666667	11	Aromatic	-5.3577	ELVOC	NA	NA	NA	NA	NA	NA	203009	0.0554914
202.051	C11H9NO3	NO3	CHNO	11	9	3	1	0	8	5	0.272727	0.818182	-0.0279632	203.058	-0.727273	0.647059	Aromatic	1.55193	SVOC	NA	NA	189885	0.129982	202884	0.0725893	152585	0.0417084
303.124	C17H20O5	O5	CHO	17	20	5	0	0	8	3	0.294118	1.17647	-0.0272166	304.131	-0.588235	0.37931	Low O unsaturated	-0.0290013	SVOC	302.27	184.783	115155	0.0788267	150466	0.0538348	202850	0.0554479
431.098	C21H20O10	O10	CHO	21	20	10	0	0	12	2	0.47619	0.952381	0.127001	432.106	0	0.4375	Low O unsaturated	-6.1977	ELVOC	340.98	188.272	62034.2	0.0424642	111386	0.0398527	202768	0.0554257
280.083	C13H15NO6	NO6	CHNO	13	15	6	1	0	7	1	0.461538	1.15385	-0.274026	281.09	-0.615385	0.333333	Low O unsaturated	-1.06742	LVOC	NA	NA	107453	0.0735544	184856	0.0661393	202683	0.0554024
334.093	C16H17NO7	NO7	CHNO	16	17	7	1	0	9	2	0.4375	1.0625	-0.280012	335.1	-0.5	0.391304	Low O unsaturated	-2.86366	LVOC	NA	NA	84973.9	0.0581671	157172	0.0562343	202080	0.0552374
372.073	C18H15NO8	NO8	CHNO	18	15	8	1	0	12	4	0.444444	0.833333	0.0752542	373.08	-0.222222	0.538462	Aromatic	-4.4188	ELVOC	NA	NA	NA	NA	107438	0.03844	202002	0.0552162
204.999	C6H6O8	O8	CHO	6	6	8	0	0	4	-4	1.33333	1	-0.127562	206.006	1.66667	0	Aliphatic	-1.06162	LVOC	303.423	174.075	NA	NA	112150	0.0401258	201985	0.0552115
145.051	C6H10O4	O4	CHO	6	10	4	0	0	2	-2	0.666667	1.66667	-0.0268872	146.058	-0.333333	0	Aliphatic	4.66569	IVOC	249.661	174.882	179595	0.122938	201744	0.0721816	89934.2	0.024583
387.036	C18H12O10	O10	CHO	18	12	10	0	0	13	3	0.555556	0.666667	-0.318704	388.043	0.444444	0.615385	Aromatic	-6.02982	ELVOC	327.423	183.554	NA	NA	81415.8	0.0291296	201665	0.0551241
398.073	C16H17NO11	NO11	CHNO	16	17	11	1	0	9	-2	0.6875	1.0625	-0.0988512	399.08	0	0.263158	High O unsaturated	-5.71328	ELVOC	NA	NA	NA	NA	102772	0.0367706	201516	0.0550834
343.119	C19H20O6	O6	CHO	19	20	6	0	0	10	4	0.315789	1.05263	0.226161	344.126	-0.421053	0.4375	Low O unsaturated	-1.81497	LVOC	314.926	186.035	95397	0.065302	165107	0.0590734	201499	0.0550786
389.109	C16H22O11	O11	CHO	16	22	11	0	0	6	-5	0.6875	1.375	0.0352086	390.116	0	0.047619	High O unsaturated	-4.97565	ELVOC	342.284	186.98	94867.5	0.0649395	191190	0.0684056	201036	0.0549521
465.104	C21H22O12	O12	CHO	21	22	12	0	0	11	-1	0.571429	1.04762	0.0898724	466.111	0.0952381	0.333333	High O unsaturated	-7.90875	ELVOC	351.421	189.605	NA	NA	77972.6	0.0278976	200887	0.0549114
264.015	C11H7NO7	NO7	CHNO	11	7	7	1	0	9	2	0.636364	0.636364	-0.00056815	265.022	0.181818	0.692308	Condensed aromatic	-1.30911	LVOC	NA	NA	47731.2	0.0326734	157530	0.0563624	200828	0.0548951
313.108	C18H18O5	O5	CHO	18	18	5	0	0	10	5	0.277778	1	-0.284566	314.115	-0.444444	0.483871	Low O unsaturated	-0.8453	LVOC	302.179	184.45	104035	0.0712152	165311	0.0591461	200760	0.0548767
268.061	C15H11NO4	NO4	CHNO	15	11	4	1	0	11	7	0.266667	0.733333	-0.134857	269.069	-0.533333	0.666667	Aromatic	-0.649658	LVOC	NA	NA	112140	0.0767628	173618	0.0621184	200736	0.05487
332.062	C12H15NO10	NO10	CHNO	12	15	10	1	0	6	-4	0.833333	1.25	-0.0155091	333.07	1.11e-16	0	Aliphatic	-3.5735	ELVOC	NA	NA	NA	NA	91568.6	0.0327621	200624	0.0548396
283.098	C17H16O4	O4	CHO	17	16	4	0	0	10	6	0.235294	0.941176	0.0397389	284.105	-0.470588	0.533333	Aromatic	0.0762689	SVOC	286.808	182.798	123111	0.0842734	187580	0.0671137	200463	0.0547954
331.061	C20H12O5	O5	CHO	20	12	5	0	0	15	10	0.25	0.6	-0.279254	332.068	-0.1	0.714286	Condensed aromatic	-2.77567	LVOC	296.487	182.442	54984.9	0.0376387	106521	0.0381119	200188	0.0547202
396.094	C17H19NO10	NO10	CHNO	17	19	10	1	0	9	-1	0.588235	1.11765	0.0445602	397.101	-0.235294	0.272727	High O unsaturated	-5.29496	ELVOC	NA	NA	52462.1	0.0359118	107814	0.0385746	199779	0.0546085
256.062	C14H11NO4	NO4	CHNO	14	11	4	1	0	10	6	0.285714	0.785714	-0.0474495	257.069	-0.571429	0.636364	Aromatic	-0.246743	SVOC	NA	NA	136500	0.093438	199651	0.0714328	177420	0.0484969
388.067	C18H15NO9	NO9	CHNO	18	15	9	1	0	12	3	0.5	0.833333	-0.237588	389.075	-0.111111	0.52	Aromatic	-5.11963	ELVOC	NA	NA	NA	NA	91533.6	0.0327496	199646	0.0545722
348.036	C15H11NO9	NO9	CHNO	15	11	9	1	0	11	2	0.6	0.733333	0.276695	349.043	0.133333	0.578947	Aromatic	-4.11638	ELVOC	NA	NA	NA	NA	91059.2	0.0325799	199093	0.0544209
314.031	C15H9NO7	NO7	CHNO	15	9	7	1	0	12	5	0.466667	0.6	0.142024	315.038	5.55e-17	0.714286	Condensed aromatic	-2.7733	LVOC	NA	NA	47247	0.032342	117277	0.0419604	198812	0.0543443
315.124	C18H20O5	O5	CHO	18	20	5	0	0	9	4	0.277778	1.11111	0.102975	316.131	-0.555556	0.419355	Low O unsaturated	-0.5679	LVOC	304.354	185.21	103402	0.070782	154694	0.0553477	198738	0.0543239
194.994	C8H4O6	O6	CHO	8	4	6	0	0	7	1	0.75	0.5	-0.0392321	196.001	1	0.8	Condensed aromatic	0.883383	SVOC	282.225	173.393	66917.6	0.045807	192927	0.0690268	198634	0.0542956
336.036	C14H11NO9	NO9	CHNO	14	11	9	1	0	10	1	0.642857	0.785714	-0.255776	337.043	0.142857	0.529412	Aromatic	-3.73694	ELVOC	NA	NA	NA	NA	106296	0.0380313	198604	0.0542874
411.072	C21H16O9	O9	CHO	21	16	9	0	0	14	5	0.428571	0.761905	0.0632492	412.079	0.0952381	0.575758	Aromatic	-5.83235	ELVOC	330.918	186.299	NA	NA	74600.5	0.0266911	198511	0.054262
455.083	C19H20O13	O13	CHO	19	20	13	0	0	10	-3	0.684211	1.05263	-0.0517488	456.09	0.315789	0.28	High O unsaturated	-8.53197	ELVOC	351.4	188.268	NA	NA	79432.2	0.0284199	198508	0.0542611
198.041	C8H9NO5	NO5	CHNO	8	9	5	1	0	5	0	0.625	1.125	-0.0209553	199.048	-0.5	0.333333	High O unsaturated	1.34423	SVOC	NA	NA	152543	0.10442	198218	0.0709199	198413	0.054235
447.093	C21H20O11	O11	CHO	21	20	11	0	0	12	1	0.52381	0.952381	-0.00391417	448.101	0.0952381	0.419355	High O unsaturated	-7.16877	ELVOC	345.244	188.579	NA	NA	92560.5	0.033117	198410	0.0542342
268.994	C10H6O9	O9	CHO	10	6	9	0	0	8	-1	0.9	0.6	0.0464695	270.001	1.2	0.636364	Aromatic	-3.04368	LVOC	310.298	176.445	NA	NA	151684	0.0542706	198237	0.054187
366.047	C15H13NO10	NO10	CHNO	15	13	10	1	0	10	0	0.666667	0.866667	-0.146839	367.054	0.133333	0.444444	High O unsaturated	-4.76233	ELVOC	NA	NA	NA	NA	94366.7	0.0337633	198211	0.05418
297.004	C15H6O7	O7	CHO	15	6	7	0	0	13	6	0.466667	0.4	-0.11414	298.011	0.533333	0.826087	Condensed aromatic	-2.63102	LVOC	295.413	177.853	44480.2	0.030448	113960	0.0407733	198098	0.0541491
391.052	C14H16O13	O13	CHO	14	16	13	0	0	7	-6	0.928571	1.14286	-0.102033	392.059	0.714286	0.0666667	High O unsaturated	-7.64839	ELVOC	343.989	184.304	NA	NA	92142.3	0.0329674	198076	0.0541429
260.041	C9H11NO8	NO8	CHNO	9	11	8	1	0	5	-3	0.888889	1.22222	-0.114982	261.048	-2.22e-16	0	Aliphatic	-1.15008	LVOC	NA	NA	52399.2	0.0358688	115674	0.0413869	197600	0.0540129
449.109	C21H22O11	O11	CHO	21	22	11	0	0	11	0	0.52381	1.04762	-0.183029	450.116	0	0.354839	High O unsaturated	-6.89137	ELVOC	347.529	189.315	44236.2	0.030281	96636.7	0.0345754	197315	0.0539349
303.066	C19H12O4	O4	CHO	19	12	4	0	0	14	10	0.210526	0.631579	0.25011	304.074	-0.210526	0.705882	Condensed aromatic	-1.61228	LVOC	284.657	181.648	79238.9	0.0542413	146272	0.0523342	197221	0.0539092
377.067	C21H14O7	O7	CHO	21	14	7	0	0	15	8	0.333333	0.666667	0.121464	378.074	0	0.657143	Aromatic	-4.44407	ELVOC	316.474	184.64	NA	NA	96980.3	0.0346984	197204	0.0539046
162.02	C8H5NO3	NO3	CHNO	8	5	3	1	0	7	4	0.375	0.625	-0.0435132	163.027	-0.5	0.818182	Condensed aromatic	2.60206	IVOC	NA	NA	179227	0.122686	196687	0.0703722	143413	0.0392011
373.129	C20H22O7	O7	CHO	20	22	7	0	0	10	3	0.35	1.1	-0.428002	374.136	-0.4	0.393939	Low O unsaturated	-2.82205	LVOC	325.831	187.56	72758.5	0.0498053	116521	0.0416899	196600	0.0537394
322.093	C15H17NO7	NO7	CHNO	15	17	7	1	0	8	1	0.466667	1.13333	0.0361697	323.101	-0.533333	0.333333	Low O unsaturated	-2.4725	LVOC	NA	NA	98641.9	0.0675232	157941	0.0565093	196431	0.0536933
413.088	C21H18O9	O9	CHO	21	18	9	0	0	13	4	0.428571	0.857143	0.0128302	414.095	0	0.515152	Aromatic	-5.55495	ELVOC	333.741	187.154	NA	NA	100179	0.035843	196258	0.053646
250.072	C12H13NO5	NO5	CHNO	12	13	5	1	0	7	2	0.416667	1.08333	0.0197943	251.079	-0.666667	0.411765	Low O unsaturated	-0.0547261	SVOC	NA	NA	155090	0.106164	196171	0.0701877	176325	0.0481976
159.066	C7H12O4	O4	CHO	7	12	4	0	0	2	-2	0.571429	1.71429	-0.0260898	160.074	-0.571429	0	Aliphatic	4.56924	IVOC	253.852	176.293	165087	0.113007	195863	0.0700773	83652.6	0.022866
252.015	C10H7NO7	NO7	CHNO	10	7	7	1	0	8	1	0.7	0.7	-0.0466242	253.022	0.2	0.636364	Aromatic	-0.932808	LVOC	NA	NA	41189.9	0.0281957	163008	0.0583221	195718	0.0534984
383.135	C18H24O9	O9	CHO	18	24	9	0	0	7	-2	0.5	1.33333	-0.0929177	384.142	-0.333333	0.185185	High O unsaturated	-3.36687	LVOC	336.621	188.031	103602	0.0709189	156747	0.0560822	195673	0.0534862
295.098	C18H16O4	O4	CHO	18	16	4	0	0	11	7	0.222222	0.888889	0.204847	296.105	-0.444444	0.5625	Aromatic	-0.488019	SVOC	288.927	183.187	98012.5	0.0670924	172500	0.0617183	195502	0.0534395
235.098	C13H16O4	O4	CHO	13	16	4	0	0	6	2	0.307692	1.23077	-0.0159508	236.105	-0.615385	0.363636	Low O unsaturated	2.26341	SVOC	276.864	181.067	147937	0.101267	195037	0.0697817	126572	0.0345976
441.067	C18H18O13	O13	CHO	18	18	13	0	0	10	-3	0.722222	1	-0.200083	442.075	0.444444	0.304348	High O unsaturated	-8.47833	ELVOC	348.514	187.054	NA	NA	84123.1	0.0300982	195017	0.0533068
190.051	C10H9NO3	NO3	CHNO	10	9	3	1	0	7	4	0.3	0.9	-0.0584054	191.058	-0.8	0.6	Aromatic	1.95421	SVOC	NA	NA	173825	0.118988	194781	0.0696903	126574	0.0345983
379.14	C19H24O8	O8	CHO	19	24	8	0	0	8	0	0.421053	1.26316	-0.230786	380.147	-0.421053	0.266667	Low O unsaturated	-2.89212	LVOC	332.473	188.163	93129.5	0.0637499	130624	0.0467356	194687	0.0532166
393.067	C14H18O13	O13	CHO	14	18	13	0	0	6	-7	0.928571	1.28571	0.0620759	394.075	0.571429	0	Aliphatic	-7.37099	ELVOC	345.781	185.051	NA	NA	77603.2	0.0277655	194425	0.053145
379.046	C20H12O8	O8	CHO	20	12	8	0	0	15	7	0.4	0.6	0.38122	380.053	0.2	0.6875	Condensed aromatic	-5.03485	ELVOC	318.072	183.642	NA	NA	99463.3	0.0355867	194388	0.053135
276.015	C12H7NO7	NO7	CHNO	12	7	7	1	0	10	3	0.583333	0.583333	0.0373168	277.022	0.166667	0.733333	Condensed aromatic	-1.68937	LVOC	NA	NA	NA	NA	133859	0.0478932	194300	0.053111
229.087	C14H14O3	O3	CHO	14	14	3	0	0	8	5	0.214286	1	-0.0532549	230.094	-0.571429	0.52	Aromatic	2.08638	SVOC	261.867	180.272	150832	0.103249	194134	0.0694589	144374	0.0394638
281.034	C9H14O8S	O8S	CHOS	9	14	8	0	1	3	-5	0.888889	1.55556	0.0596014	282.041	-0.444444	0	Aliphatic	-2.30399	LVOC	NA	NA	NA	NA	NA	NA	194094	0.0530547
371.114	C20H20O7	O7	CHO	20	20	7	0	0	11	4	0.35	1	-0.187678	372.121	-0.3	0.454545	Low O unsaturated	-3.09945	LVOC	323.646	186.83	66630.5	0.0456105	144181	0.0515862	194071	0.0530483
153.056	C8H10O3	O3	CHO	8	10	3	0	0	4	1	0.375	1.25	-0.0414882	154.063	-0.5	0.384615	Low O unsaturated	4.77816	IVOC	237.765	175.702	188718	0.129183	193890	0.0693715	104097	0.0284545
384.094	C16H19NO10	NO10	CHNO	16	19	10	1	0	8	-2	0.625	1.1875	0.358376	385.101	-0.25	0.2	High O unsaturated	-4.91451	ELVOC	NA	NA	52799.6	0.0361428	108331	0.0387596	193578	0.0529134
139.04	C7H8O3	O3	CHO	7	8	3	0	0	4	1	0.428571	1.14286	-0.0424338	140.047	-0.285714	0.454545	Low O unsaturated	4.98397	IVOC	233.183	174.249	189564	0.129762	193232	0.069136	114066	0.0311792
270.977	C6H8O10S	O10S	CHOS	6	8	10	0	1	3	-7	1.66667	1.33333	-0.128609	271.984	1	0	Aliphatic	-4.71701	ELVOC	NA	NA	NA	NA	NA	NA	193165	0.0528006
429.083	C21H18O10	O10	CHO	21	18	10	0	0	13	3	0.47619	0.857143	0.018994	430.09	0.0952381	0.5	Low O unsaturated	-6.4751	ELVOC	338.454	187.482	NA	NA	92901.4	0.033239	192875	0.0527213
217.087	C13H14O3	O3	CHO	13	14	3	0	0	7	4	0.230769	1.07692	-0.0520529	218.094	-0.615385	0.478261	Low O unsaturated	2.65333	IVOC	258.814	179.841	149498	0.102336	192776	0.0689728	135601	0.0370658
423.13	C20H24O10	O10	CHO	20	24	10	0	0	9	-1	0.5	1.2	0.0189067	424.137	-0.2	0.266667	High O unsaturated	-5.20387	ELVOC	344.205	189.26	67276.2	0.0460525	115461	0.0413105	192684	0.0526692
251.035	C15H8O4	O4	CHO	15	8	4	0	0	12	8	0.266667	0.533333	-0.0221085	252.042	0	0.769231	Condensed aromatic	0.0764523	SVOC	270.593	178.005	125257	0.0857418	191857	0.0686442	189060	0.0516786
363.087	C21H16O6	O6	CHO	21	16	6	0	0	14	8	0.285714	0.761905	-0.202017	364.095	-0.190476	0.611111	Aromatic	-3.43407	LVOC	312.779	185.172	55500.1	0.0379914	111791	0.0399974	191834	0.0524367
392.062	C17H15NO10	NO10	CHNO	17	15	10	1	0	11	1	0.588235	0.882353	0.0507572	393.07	5.55e-17	0.454545	High O unsaturated	-5.44536	ELVOC	NA	NA	NA	NA	100138	0.035828	191516	0.0523498
457.099	C19H22O13	O13	CHO	19	22	13	0	0	9	-4	0.684211	1.15789	0.010501	458.106	0.210526	0.2	High O unsaturated	-8.25457	ELVOC	353.479	188.979	NA	NA	93692.7	0.0335221	191400	0.0523183
353.018	C11H14O11S	O11S	CHOS	11	14	11	0	1	5	-6	1	1.27273	-0.0393747	354.026	0.181818	0	Aliphatic	-6.37956	ELVOC	NA	NA	NA	NA	NA	NA	191351	0.0523048
188.035	C10H7NO3	NO3	CHNO	10	7	3	1	0	8	5	0.3	0.7	-0.0406838	189.043	-0.6	0.733333	Condensed aromatic	1.87901	SVOC	NA	NA	173998	0.119107	191090	0.0683698	145487	0.0397682
330.083	C13H17NO9	NO9	CHNO	13	17	9	1	0	6	-3	0.692308	1.30769	-0.25948	331.09	-0.307692	0.0666667	High O unsaturated	-3.13502	LVOC	NA	NA	68308.8	0.0467593	112260	0.0401652	190907	0.0521833
271.01	C10H8O9	O9	CHO	10	8	9	0	0	7	-2	0.9	0.8	-0.021217	272.017	1	0.454545	High O unsaturated	-2.76628	LVOC	312.581	177.6	NA	NA	85624.6	0.0306354	190843	0.0521658
358.093	C18H17NO7	NO7	CHNO	18	17	7	1	0	11	4	0.388889	0.944444	0.183332	359.101	-0.444444	0.481481	Low O unsaturated	-3.65144	ELVOC	NA	NA	65453.5	0.0448048	135778	0.0485797	190541	0.0520833
279.124	C15H20O5	O5	CHO	15	20	5	0	0	6	1	0.333333	1.33333	0.0562474	280.131	-0.666667	0.28	Low O unsaturated	1.02333	SVOC	297.708	183.874	144908	0.0991934	190466	0.0681463	157732	0.0431151
435.057	C19H16O12	O12	CHO	19	16	12	0	0	12	0	0.631579	0.842105	0.154003	436.064	0.421053	0.461538	High O unsaturated	-7.97712	ELVOC	342.758	186.413	NA	NA	79192.9	0.0283342	190332	0.0520263
161.061	C10H10O2	O2	CHO	10	10	2	0	0	6	4	0.2	1	-0.0434618	162.068	-0.6	0.555556	Aromatic	4.38033	IVOC	219.862	176.3	172441	0.118041	190324	0.0680957	114127	0.0311961
259.098	C15H16O4	O4	CHO	15	16	4	0	0	8	4	0.266667	1.06667	-0.0530688	260.105	-0.533333	0.461538	Low O unsaturated	1.18605	SVOC	282.169	181.971	147299	0.10083	190288	0.0680826	183312	0.0501074
365.072	C13H18O12	O12	CHO	13	18	12	0	0	5	-7	0.923077	1.38462	-0.320347	366.08	0.461538	0	Aliphatic	-5.87266	ELVOC	340.458	184.26	NA	NA	89870.3	0.0321545	190091	0.0519603
208.062	C10H11NO4	NO4	CHNO	10	11	4	1	0	6	2	0.4	1.1	-0.0158607	209.069	-0.8	0.428571	Low O unsaturated	1.34923	SVOC	NA	NA	150775	0.10321	189906	0.0679461	153275	0.0418968
321.083	C12H18O10	O10	CHO	12	18	10	0	0	4	-6	0.833333	1.5	0.200883	322.09	0.166667	0	Aliphatic	-3.12858	LVOC	328.788	183.194	68873.7	0.0471461	113480	0.0406018	189570	0.051818
270.026	C10H9NO8	NO8	CHNO	10	9	8	1	0	7	-1	0.8	0.9	0.0524025	271.033	0.2	0.4	High O unsaturated	-1.59008	LVOC	NA	NA	NA	NA	119093	0.0426099	189533	0.0518079
173.024	C10H6O3	O3	CHO	10	6	3	0	0	8	5	0.3	0.6	-0.0343882	174.032	0	0.764706	Condensed aromatic	3.19206	IVOC	241.279	174.5	189100	0.129444	184410	0.0659795	137093	0.0374735
375.024	C10H16O13S	O13S	CHOS	10	16	13	0	1	3	-10	1.3	1.6	-0.00453305	376.031	0.4	0	Aliphatic	-8.1243	ELVOC	NA	NA	NA	NA	NA	NA	188931	0.0516433
143.035	C6H8O4	O4	CHO	6	8	4	0	0	3	-1	0.666667	1.33333	-0.0475408	144.042	0	0.25	High O unsaturated	4.38829	IVOC	250.353	174.017	178715	0.122335	188554	0.0674624	125006	0.0341697
355.14	C17H24O8	O8	CHO	17	24	8	0	0	6	-2	0.470588	1.41176	-0.0256237	356.147	-0.470588	0.153846	Low O unsaturated	-1.97038	LVOC	329.255	187.23	132401	0.090632	176216	0.0630479	188474	0.0515185
381.098	C21H18O7	O7	CHO	21	18	7	0	0	13	6	0.333333	0.857143	-0.152454	382.105	-0.190476	0.542857	Aromatic	-3.88927	ELVOC	322.499	186.433	NA	NA	117972	0.0422091	188412	0.0515013
372.057	C14H15NO11	NO11	CHNO	14	15	11	1	0	8	-3	0.785714	1.07143	0.270657	373.065	0.142857	0.2	High O unsaturated	-5.04486	ELVOC	NA	NA	NA	NA	65587.7	0.0234665	188167	0.0514346
340.083	C18H15NO6	NO6	CHNO	18	15	6	1	0	12	6	0.333333	0.833333	-0.0786573	341.09	-0.444444	0.571429	Aromatic	-3.04423	LVOC	NA	NA	56343.1	0.0385685	117640	0.0420901	188068	0.0514073
353.103	C20H18O6	O6	CHO	20	18	6	0	0	12	6	0.3	0.9	-0.0151514	354.11	-0.3	0.529412	Aromatic	-2.621	LVOC	314.153	185.655	NA	NA	138201	0.0494466	187659	0.0512954
463.088	C21H20O12	O12	CHO	21	20	12	0	0	12	0	0.571429	0.952381	-0.123519	464.095	0.190476	0.4	High O unsaturated	-8.18615	ELVOC	349.136	188.871	NA	NA	82663	0.0295758	187626	0.0512864
445.099	C18H22O13	O13	CHO	18	22	13	0	0	8	-5	0.722222	1.22222	0.122894	446.106	0.222222	0.130435	High O unsaturated	-7.92353	ELVOC	352.656	188.502	48167.9	0.0329723	105132	0.0376151	187377	0.0512184
415.052	C16H16O13	O13	CHO	16	16	13	0	0	9	-4	0.8125	1	0.214913	416.059	0.625	0.263158	High O unsaturated	-8.1542	ELVOC	345.102	185.315	NA	NA	79705.5	0.0285176	187264	0.0511875
449.072	C20H18O12	O12	CHO	20	18	12	0	0	12	0	0.6	0.9	-0.122141	450.08	0.3	0.428571	High O unsaturated	-8.07407	ELVOC	345.985	187.668	NA	NA	84587.5	0.0302644	187256	0.0511853
259.119	C12H20O6	O6	CHO	12	20	6	0	0	3	-3	0.5	1.66667	-0.0638703	260.126	-0.666667	0	Aliphatic	1.58933	SVOC	300.218	182.693	187216	0.128155	136304	0.0487678	100890	0.0275778
164.035	C8H7NO3	NO3	CHNO	8	7	3	1	0	6	3	0.375	0.875	-0.0185936	165.043	-0.75	0.636364	Aromatic	2.67726	IVOC	NA	NA	165798	0.113493	187060	0.0669278	128434	0.0351067
255.018	C7H12O8S	O8S	CHOS	7	12	8	0	1	2	-6	1.14286	1.71429	-0.0815629	256.025	-0.285714	0	Aliphatic	-1.95493	LVOC	NA	NA	NA	NA	NA	NA	186741	0.0510445
367.14	C18H24O8	O8	CHO	18	24	8	0	0	7	-1	0.444444	1.33333	0.153484	368.147	-0.444444	0.214286	Low O unsaturated	-2.42498	LVOC	330.909	187.705	92838.9	0.0635509	144737	0.0517852	186684	0.0510292
152.035	C7H7NO3	NO3	CHNO	7	7	3	1	0	5	2	0.428571	1	-0.0226921	153.043	-0.857143	0.555556	Aromatic	3.07195	IVOC	NA	NA	169612	0.116104	186582	0.0667568	111481	0.0304728
294.041	C16H9NO5	NO5	CHNO	16	9	5	1	0	13	8	0.3125	0.5625	0.213576	295.048	-0.25	0.76	Condensed aromatic	-1.79496	LVOC	NA	NA	63377.6	0.0433838	127075	0.0454658	186559	0.0509949
333.04	C19H10O6	O6	CHO	19	10	6	0	0	15	9	0.315789	0.526316	-0.267685	334.048	0.105263	0.75	Condensed aromatic	-3.20197	LVOC	299.808	181.418	46226.5	0.0316434	102424	0.036646	186419	0.0509565
342.998	C9H12O12S	O12S	CHOS	9	12	12	0	1	4	-8	1.33333	1.33333	-0.0562686	344.005	0.666667	0	Aliphatic	-7.26358	ELVOC	NA	NA	NA	NA	NA	NA	186416	0.0509558
288.036	C10H11NO9	NO9	CHNO	10	11	9	1	0	6	-3	0.9	1.1	0.0821078	289.043	0.2	0.111111	High O unsaturated	-2.25542	LVOC	NA	NA	NA	NA	110683	0.039601	186342	0.0509357
256.025	C13H7NO5	NO5	CHNO	13	7	5	1	0	11	6	0.384615	0.538462	0.0517527	257.032	-0.153846	0.789474	Condensed aromatic	-0.675043	LVOC	NA	NA	85633.1	0.0586184	164117	0.0587191	186329	0.0509322
399.108	C21H20O8	O8	CHO	21	20	8	0	0	12	4	0.380952	0.952381	-0.21974	400.116	-0.190476	0.470588	Low O unsaturated	-4.41361	ELVOC	330.998	187.599	52160.3	0.0357053	117533	0.042052	186312	0.0509273
173.061	C11H10O2	O2	CHO	11	10	2	0	0	7	5	0.181818	0.909091	-0.0326475	174.068	-0.545455	0.6	Aromatic	3.80059	IVOC	224.038	176.735	180072	0.123265	186152	0.0666031	130119	0.0355673
363.093	C14H20O11	O11	CHO	14	20	11	0	0	5	-6	0.785714	1.42857	-0.137155	364.101	0.142857	0	Aliphatic	-4.62153	ELVOC	338.259	185.257	72186.1	0.0494135	134711	0.0481978	186117	0.0508741
439.125	C20H24O11	O11	CHO	20	24	11	0	0	9	-2	0.55	1.2	0.196641	440.132	-0.1	0.241379	High O unsaturated	-6.19978	ELVOC	348.582	189.56	51435.9	0.0352093	108995	0.038997	185864	0.0508048
305.082	C19H14O4	O4	CHO	19	14	4	0	0	13	9	0.210526	0.736842	0.0168807	306.089	-0.315789	0.647059	Aromatic	-1.33488	LVOC	288.019	182.649	75916.6	0.0519671	161063	0.0576265	185807	0.0507894
356.099	C15H19NO9	NO9	CHNO	15	19	9	1	0	7	-2	0.6	1.26667	0.114013	357.106	-0.4	0.157895	High O unsaturated	-3.81558	ELVOC	NA	NA	67852.3	0.0464469	100332	0.0358975	185798	0.050787
409.041	C17H14O12	O12	CHO	17	14	12	0	0	11	-1	0.705882	0.823529	0.159153	410.049	0.588235	0.454545	High O unsaturated	-7.55742	ELVOC	339.023	184.665	NA	NA	77082	0.027579	185707	0.0507621
194.009	C8H5NO5	NO5	CHNO	8	5	5	1	0	7	2	0.625	0.625	-0.0301532	195.017	0	0.777778	Condensed aromatic	1.19383	SVOC	NA	NA	95587.7	0.0654325	185649	0.066423	149327	0.0408177
331.01	C15H8O9	O9	CHO	15	8	9	0	0	12	3	0.6	0.533333	-0.0845897	332.017	0.666667	0.714286	Condensed aromatic	-4.35907	ELVOC	313.521	179.828	NA	NA	88767.3	0.0317598	185598	0.0507323
392.099	C18H19NO9	NO9	CHNO	18	19	9	1	0	10	1	0.5	1.05556	-0.0669474	393.106	-0.333333	0.36	High O unsaturated	-4.96923	ELVOC	NA	NA	60338.6	0.0413035	113078	0.0404579	185325	0.0506575
408.094	C18H19NO10	NO10	CHNO	18	19	10	1	0	10	0	0.555556	1.05556	-0.0118845	409.101	-0.222222	0.333333	High O unsaturated	-5.6778	ELVOC	NA	NA	51989.5	0.0355883	87864.2	0.0314367	185314	0.0506546
254.046	C14H9NO4	NO4	CHNO	14	9	4	1	0	11	7	0.285714	0.642857	-0.252907	255.053	-0.428571	0.727273	Condensed aromatic	-0.321943	SVOC	NA	NA	102885	0.0704275	180484	0.0645749	185105	0.0505976
223.098	C12H16O4	O4	CHO	12	16	4	0	0	5	1	0.333333	1.33333	-0.0221876	224.105	-0.666667	0.3	Low O unsaturated	2.78613	IVOC	273.897	180.581	157432	0.107767	184722	0.0660913	94903.3	0.0259413
352.104	C16H19NO8	NO8	CHNO	16	19	8	1	0	8	0	0.5	1.1875	-0.244388	353.111	-0.5	0.272727	High O unsaturated	-3.48877	LVOC	NA	NA	64328.5	0.0440347	115667	0.0413841	184228	0.0503577
411.13	C19H24O10	O10	CHO	19	24	10	0	0	8	-2	0.526316	1.26316	-0.130008	412.137	-0.210526	0.214286	High O unsaturated	-4.77759	ELVOC	343	188.807	71873.1	0.0491992	126490	0.0452567	183960	0.0502844
370.057	C18H13NO8	NO8	CHNO	18	13	8	1	0	13	5	0.444444	0.722222	-0.0195916	371.064	-0.111111	0.615385	Aromatic	-4.494	ELVOC	NA	NA	NA	NA	75402.1	0.026978	183867	0.0502591
199.098	C10H16O4	O4	CHO	10	16	4	0	0	3	-1	0.4	1.6	-0.026369	200.105	-0.8	0.125	Low O unsaturated	3.78824	IVOC	267.139	179.526	183744	0.125778	167502	0.0599303	71606.9	0.0195734
403.052	C15H16O13	O13	CHO	15	16	13	0	0	8	-5	0.866667	1.06667	0.0565684	404.059	0.666667	0.176471	High O unsaturated	-7.88805	ELVOC	344.564	184.821	NA	NA	86069.5	0.0307946	183641	0.0501974
443.098	C22H20O10	O10	CHO	22	20	10	0	0	13	3	0.454545	0.909091	-0.212255	444.106	0	0.470588	Low O unsaturated	-6.64827	ELVOC	341.89	188.674	NA	NA	94459.8	0.0337965	183512	0.050162
223.04	C14H8O3	O3	CHO	14	8	3	0	0	11	8	0.214286	0.571429	-0.0210724	224.047	-0.142857	0.76	Condensed aromatic	1.25418	SVOC	253.356	177.213	146242	0.100107	183506	0.0656562	132628	0.0362531
195.045	C13H8O2	O2	CHO	13	8	2	0	0	10	8	0.153846	0.615385	-0.0410161	196.052	-0.307692	0.75	Condensed aromatic	2.34609	SVOC	228.32	176.422	183395	0.125539	161081	0.0576329	124446	0.0340167
321.134	C17H22O6	O6	CHO	17	22	6	0	0	7	1	0.352941	1.29412	-0.193688	322.142	-0.588235	0.285714	Low O unsaturated	-0.505144	SVOC	313.215	185.874	106108	0.0726337	138399	0.0495176	183240	0.0500876
241.087	C15H14O3	O3	CHO	15	14	3	0	0	9	6	0.2	0.933333	-0.0501893	242.094	-0.533333	0.555556	Aromatic	1.51313	SVOC	264.71	180.683	146666	0.100397	183213	0.0655512	164018	0.0448335
326.031	C16H9NO7	NO7	CHNO	16	9	7	1	0	13	6	0.4375	0.5625	0.267306	327.038	0	0.73913	Condensed aromatic	-3.16446	LVOC	NA	NA	NA	NA	100907	0.0361031	183176	0.0500701
288.072	C11H15NO8	NO8	CHNO	11	15	8	1	0	5	-3	0.727273	1.36364	-0.29437	289.08	-0.363636	0	Aliphatic	-1.73444	LVOC	NA	NA	76463.3	0.0523414	113911	0.0407561	182393	0.0498561
410.073	C17H17NO11	NO11	CHNO	17	17	11	1	0	10	-1	0.647059	1	-0.0342622	411.08	5.55e-17	0.333333	High O unsaturated	-6.0896	ELVOC	NA	NA	NA	NA	80235	0.0287071	182385	0.049854
417.119	C21H22O9	O9	CHO	21	22	9	0	0	11	2	0.428571	1.04762	0.0430333	418.126	-0.190476	0.393939	Low O unsaturated	-5.00015	ELVOC	338.552	188.683	62485.6	0.0427732	104708	0.0374633	182171	0.0497956
459.093	C22H20O11	O11	CHO	22	20	11	0	0	13	2	0.5	0.909091	-0.140277	460.1	0.0909091	0.454545	High O unsaturated	-7.59567	ELVOC	346.045	188.987	NA	NA	76046.8	0.0272086	181914	0.0497251
205.087	C12H14O3	O3	CHO	12	14	3	0	0	6	3	0.25	1.16667	-0.038764	206.094	-0.666667	0.428571	Low O unsaturated	3.21269	IVOC	255.517	179.389	144224	0.0987255	181682	0.0650037	108681	0.0297073
467.083	C20H20O13	O13	CHO	20	20	13	0	0	11	-2	0.65	1	0.00631579	468.09	0.3	0.333333	High O unsaturated	-8.88076	ELVOC	352.075	188.716	NA	NA	84665.9	0.0302924	181550	0.0496258
378.047	C16H13NO10	NO10	CHNO	16	13	10	1	0	11	1	0.625	0.8125	-0.14231	379.054	0.125	0.5	High O unsaturated	-5.14011	ELVOC	NA	NA	NA	NA	86825.5	0.0310651	181399	0.0495845
325.108	C19H18O5	O5	CHO	19	18	5	0	0	11	6	0.263158	0.947368	-0.14995	326.115	-0.421053	0.515152	Aromatic	-1.39127	LVOC	304.027	184.848	75753.6	0.0518556	138054	0.0493941	181394	0.0495831
209.061	C14H10O2	O2	CHO	14	10	2	0	0	10	8	0.142857	0.714286	-0.0387447	210.068	-0.428571	0.692308	Condensed aromatic	2.02833	SVOC	234.603	177.908	177723	0.121657	181218	0.0648376	144819	0.0395855
369.025	C18H10O9	O9	CHO	18	10	9	0	0	14	5	0.5	0.555556	-0.0117878	370.032	0.444444	0.703704	Condensed aromatic	-5.30867	ELVOC	318.55	182.158	NA	NA	81684.5	0.0292257	181210	0.0495329
365.03	C19H10O8	O8	CHO	19	10	8	0	0	15	7	0.421053	0.526316	-0.207243	366.037	0.315789	0.733333	Condensed aromatic	-4.83392	ELVOC	313.38	182.178	NA	NA	64724.7	0.0231577	181145	0.0495151
238.072	C11H13NO5	NO5	CHNO	11	13	5	1	0	6	1	0.454545	1.18182	-0.041164	239.079	-0.727273	0.333333	Low O unsaturated	0.337593	SVOC	NA	NA	124128	0.0849694	181085	0.0647901	138852	0.0379544
195.051	C6H12O7	O7	CHO	6	12	7	0	0	1	-6	1.16667	2	-0.0320429	196.058	0.333333	0	Aliphatic	1.16568	SVOC	291.222	176.453	84581	0.0578982	68235	0.0244136	181007	0.0494774
304.067	C11H15NO9	NO9	CHNO	11	15	9	1	0	5	-4	0.818182	1.36364	-0.18121	305.075	-0.181818	0	Aliphatic	-2.46887	LVOC	NA	NA	NA	NA	80302	0.0287311	180983	0.0494707
249.056	C16H10O3	O3	CHO	16	10	3	0	0	12	9	0.1875	0.625	-0.0742806	250.063	-0.25	0.724138	Condensed aromatic	0.379747	SVOC	261.28	179.07	128062	0.0876623	180839	0.0647021	173760	0.0474963
371.135	C17H24O9	O9	CHO	17	24	9	0	0	6	-3	0.529412	1.41176	-0.17918	372.142	-0.352941	0.12	High O unsaturated	-2.94135	LVOC	335.131	187.548	117204	0.0802296	180569	0.0646053	155071	0.0423878
203.092	C9H16O5	O5	CHO	9	16	5	0	0	2	-3	0.555556	1.77778	-0.0416067	204.1	-0.666667	0	Aliphatic	3.29075	IVOC	277.825	179.287	180288	0.123412	146178	0.0523005	110195	0.0301213
445.078	C21H18O11	O11	CHO	21	18	11	0	0	13	2	0.52381	0.857143	-0.0388696	446.085	0.190476	0.483871	High O unsaturated	-7.44617	ELVOC	342.718	187.791	NA	NA	83892.3	0.0300156	180069	0.0492209
403.019	C11H16O14S	O14S	CHOS	11	16	14	0	1	4	-10	1.27273	1.45455	0.114759	404.026	0.545455	0	Aliphatic	-9.58906	ELVOC	NA	NA	NA	NA	NA	NA	180056	0.0492172
435.13	C21H24O10	O10	CHO	21	24	10	0	0	10	0	0.47619	1.14286	-0.187875	436.137	-0.190476	0.3125	Low O unsaturated	-5.6429	ELVOC	345.351	189.698	53628.9	0.0367106	102101	0.0365305	179977	0.0491958
343.009	C16H8O9	O9	CHO	16	8	9	0	0	13	4	0.5625	0.5	-0.193581	344.017	0.625	0.73913	Condensed aromatic	-4.75089	ELVOC	313.671	180.213	NA	NA	74625.3	0.0267	179608	0.049095
351.145	C18H24O7	O7	CHO	18	24	7	0	0	7	0	0.388889	1.33333	0.143673	352.152	-0.555556	0.241379	Low O unsaturated	-1.54654	LVOC	324.434	187.358	103086	0.0705654	150436	0.0538241	179562	0.0490823
361.02	C16H10O10	O10	CHO	16	10	10	0	0	12	2	0.625	0.625	-0.324359	362.027	0.625	0.636364	Aromatic	-5.5317	ELVOC	323.121	181.689	NA	NA	62627.3	0.0224073	179517	0.04907
374.052	C17H13NO9	NO9	CHNO	17	13	9	1	0	12	3	0.529412	0.764706	-0.405158	375.059	5.55e-17	0.565217	Aromatic	-4.80802	ELVOC	NA	NA	NA	NA	76944.2	0.0275297	179443	0.0490497
314.088	C13H17NO8	NO8	CHNO	13	17	8	1	0	6	-2	0.615385	1.30769	-0.180204	315.095	-0.461538	0.125	High O unsaturated	-2.41171	LVOC	NA	NA	74036.3	0.05068	130932	0.0468458	179442	0.0490496
345.134	C19H22O6	O6	CHO	19	22	6	0	0	9	3	0.315789	1.15789	0.109378	346.142	-0.526316	0.375	Low O unsaturated	-1.53757	LVOC	317.004	186.754	110089	0.0753593	130345	0.0466357	179215	0.0489873
226.051	C13H9NO3	NO3	CHNO	13	9	3	1	0	10	7	0.230769	0.692308	-0.0499887	227.058	-0.615385	0.714286	Condensed aromatic	0.742993	SVOC	NA	NA	123167	0.0843111	178796	0.0639711	150653	0.0411802
291.124	C16H20O5	O5	CHO	16	20	5	0	0	7	2	0.3125	1.25	0.153886	292.131	-0.625	0.333333	Low O unsaturated	0.501812	SVOC	300.061	184.338	112556	0.077048	173907	0.0622216	178747	0.0488595
407.083	C15H20O13	O13	CHO	15	20	13	0	0	6	-7	0.866667	1.33333	-0.0115456	408.09	0.4	0	Aliphatic	-7.33325	ELVOC	348.291	186.293	NA	NA	82762.5	0.0296114	178568	0.0488107
395.135	C19H24O9	O9	CHO	19	24	9	0	0	8	-1	0.473684	1.26316	-0.216888	396.142	-0.315789	0.241379	Low O unsaturated	-3.80656	ELVOC	338.029	188.495	78465.5	0.0537119	117680	0.0421043	178516	0.0487963
147.045	C9H8O2	O2	CHO	9	8	2	0	0	6	4	0.222222	0.888889	-0.032303	148.052	-0.444444	0.625	Aromatic	4.67465	IVOC	213.983	174.852	177902	0.121779	169906	0.0607904	116718	0.0319042
184.025	C7H7NO5	NO5	CHNO	7	7	5	1	0	5	0	0.714286	1	-0.0326042	185.032	-0.285714	0.428571	High O unsaturated	1.6453	SVOC	NA	NA	128728	0.088118	177888	0.0636462	168203	0.0459773
361.072	C21H14O6	O6	CHO	21	14	6	0	0	15	9	0.285714	0.666667	-0.15911	362.079	-0.0952381	0.666667	Aromatic	-3.71147	ELVOC	309.578	184.236	NA	NA	104909	0.0375351	177820	0.0486062
393.062	C21H14O8	O8	CHO	21	14	8	0	0	15	7	0.380952	0.666667	0.0058515	394.069	0.0952381	0.647059	Aromatic	-5.24581	ELVOC	322.448	185.016	NA	NA	69048.7	0.0247048	177718	0.0485782
308.056	C17H11NO5	NO5	CHNO	17	11	5	1	0	13	8	0.294118	0.647059	-0.266023	309.064	-0.352941	0.703704	Condensed aromatic	-2.12095	LVOC	NA	NA	50252.2	0.0343991	127313	0.0455511	177463	0.0485085
263.071	C17H12O3	O3	CHO	17	12	3	0	0	12	9	0.176471	0.705882	-0.0256584	264.079	-0.352941	0.677419	Condensed aromatic	0.074046	SVOC	266.874	180.484	128527	0.0879805	177254	0.0634192	175410	0.0479475
212.02	C8H7NO6	NO6	CHNO	8	7	6	1	0	6	0	0.75	0.875	-0.0238185	213.027	0	0.5	High O unsaturated	0.542397	SVOC	NA	NA	78348.2	0.0536316	174117	0.0622967	176522	0.0482514
135.045	C8H8O2	O2	CHO	8	8	2	0	0	5	3	0.25	1	-0.00888592	136.052	-0.5	0.571429	Aromatic	5.23597	IVOC	209.391	174.398	176048	0.12051	174058	0.062276	97952.6	0.0267748
385.008	C11H14O13S	O13S	CHOS	11	14	13	0	1	5	-8	1.18182	1.27273	-0.0637649	386.016	0.545455	0	Aliphatic	-8.70486	ELVOC	NA	NA	NA	NA	NA	NA	175979	0.048103
182.009	C7H5NO5	NO5	CHNO	7	5	5	1	0	6	1	0.714286	0.714286	-0.0472503	183.017	1.11e-16	0.714286	Aromatic	1.5701	SVOC	NA	NA	83566.8	0.0572039	175799	0.0628988	151221	0.0413355
379.052	C13H16O13	O13	CHO	13	16	13	0	0	6	-7	1	1.23077	0.342829	380.059	0.769231	0	Aliphatic	-7.43827	ELVOC	343.372	183.761	NA	NA	NA	NA	175758	0.0480424
439.052	C18H16O13	O13	CHO	18	16	13	0	0	11	-2	0.722222	0.888889	-0.129825	440.059	0.555556	0.391304	High O unsaturated	-8.75573	ELVOC	346.083	186.244	NA	NA	NA	NA	175504	0.0479731
481.099	C21H22O13	O13	CHO	21	22	13	0	0	11	-2	0.619048	1.04762	-0.109541	482.106	0.190476	0.310345	High O unsaturated	-8.96833	ELVOC	355.002	189.88	NA	NA	80886.6	0.0289402	175473	0.0479646
267.124	C14H20O5	O5	CHO	14	20	5	0	0	5	0	0.357143	1.42857	-0.0237717	268.131	-0.714286	0.217391	Low O unsaturated	1.53407	SVOC	295.194	183.389	158926	0.10879	175451	0.0627741	127939	0.0349713
461.109	C22H22O11	O11	CHO	22	22	11	0	0	12	1	0.5	1	-0.128928	462.116	0	0.393939	High O unsaturated	-7.31827	ELVOC	348.426	189.733	NA	NA	82530	0.0295282	175350	0.047931
288.088	C15H15NO5	NO5	CHNO	15	15	5	1	0	9	4	0.333333	1	0.0229097	289.095	-0.666667	0.478261	Low O unsaturated	-1.16943	LVOC	NA	NA	89672.4	0.0613833	175189	0.0626804	164466	0.044956
259.01	C9H8O9	O9	CHO	9	8	9	0	0	6	-3	1	0.888889	-0.0988381	260.017	1.11111	0.333333	High O unsaturated	-2.54947	LVOC	312.337	177.076	NA	NA	91539.9	0.0327518	175163	0.0478799
406.078	C18H17NO10	NO10	CHNO	18	17	10	1	0	11	1	0.555556	0.944444	-0.125345	407.085	-0.111111	0.416667	High O unsaturated	-5.753	ELVOC	NA	NA	43079.3	0.029489	90364.2	0.0323312	174847	0.0477935
318.025	C14H9NO8	NO8	CHNO	14	9	8	1	0	11	3	0.571429	0.642857	-0.362707	319.033	0.142857	0.666667	Aromatic	-3.09389	LVOC	NA	NA	NA	NA	105628	0.0377923	174773	0.0477733
433.099	C17H22O13	O13	CHO	17	22	13	0	0	7	-6	0.764706	1.29412	-0.0615333	434.106	0.235294	0.047619	High O unsaturated	-7.61199	ELVOC	351.787	188.007	40644.7	0.0278225	107716	0.0385395	174517	0.0477034
146.993	C4H4O6	O6	CHO	4	4	6	0	0	3	-3	1.5	1	-0.0853779	148.001	2	0	Aliphatic	1.61109	SVOC	284.149	171.332	NA	NA	NA	NA	174410	0.047674
178.051	C9H9NO3	NO3	CHNO	9	9	3	1	0	6	3	0.333333	1	-0.021623	179.058	-0.888889	0.538462	Aromatic	2.35457	SVOC	NA	NA	142833	0.0977736	173604	0.0621132	109345	0.0298889
467.12	C21H24O12	O12	CHO	21	24	12	0	0	10	-2	0.571429	1.14286	0.0938732	468.127	0	0.266667	High O unsaturated	-7.63135	ELVOC	353.507	190.292	NA	NA	95003.6	0.0339911	173460	0.0474145
455.12	C20H24O12	O12	CHO	20	24	12	0	0	9	-3	0.6	1.2	0.0703112	456.127	0	0.214286	High O unsaturated	-7.24187	ELVOC	352.578	189.844	NA	NA	83489.3	0.0298714	173460	0.0474143
368.078	C19H15NO7	NO7	CHNO	19	15	7	1	0	13	6	0.368421	0.789474	0.177137	369.085	-0.315789	0.586207	Aromatic	-4.12284	ELVOC	NA	NA	49335.7	0.0337717	102380	0.0366304	173378	0.047392
182.046	C8H9NO4	NO4	CHNO	8	9	4	1	0	5	1	0.5	1.125	-0.0406491	183.053	-0.75	0.4	High O unsaturated	2.0571	SVOC	NA	NA	153269	0.104917	173247	0.0619855	123838	0.0338503
280.062	C16H11NO4	NO4	CHNO	16	11	4	1	0	12	8	0.25	0.6875	-0.0715914	281.069	-0.5	0.692308	Condensed aromatic	-1.05367	LVOC	NA	NA	85513.4	0.0585364	123290	0.0441116	173124	0.0473224
427.125	C19H24O11	O11	CHO	19	24	11	0	0	8	-3	0.578947	1.26316	0.0224759	428.132	-0.105263	0.185185	High O unsaturated	-5.79955	ELVOC	347.496	189.101	62397.4	0.0427128	121791	0.0435752	173037	0.0472987
453.068	C19H18O13	O13	CHO	19	18	13	0	0	11	-2	0.684211	0.947368	0.201184	454.075	0.421053	0.36	High O unsaturated	-8.80937	ELVOC	349.103	187.506	NA	NA	71432.3	0.0255576	172969	0.0472803
295.013	C9H12O9S	O9S	CHOS	9	12	9	0	1	4	-5	1	1.33333	0.0540654	296.02	1.11e-16	0	Aliphatic	-3.73836	ELVOC	NA	NA	NA	NA	NA	NA	172760	0.047223
253.087	C16H14O3	O3	CHO	16	14	3	0	0	10	7	0.1875	0.875	-0.0703315	254.094	-0.5	0.586207	Aromatic	0.934547	SVOC	267.368	181.076	127084	0.0869926	172719	0.0617969	166001	0.0453756
191.056	C7H12O6	O6	CHO	7	12	6	0	0	2	-4	0.857143	1.71429	-0.0486768	192.063	0	0	Aliphatic	2.27688	SVOC	282.85	176.883	147405	0.100903	172324	0.0616552	121728	0.0332737
212.056	C9H11NO5	NO5	CHNO	9	11	5	1	0	5	0	0.555556	1.22222	-0.0162693	213.064	-0.666667	0.272727	High O unsaturated	1.03778	SVOC	NA	NA	140852	0.0964171	172149	0.0615929	159561	0.0436152
363.145	C19H24O7	O7	CHO	19	24	7	0	0	8	1	0.368421	1.26316	-0.303322	364.152	-0.526316	0.290323	Low O unsaturated	-2.0408	LVOC	326.174	187.808	76701	0.052504	117904	0.0421846	172095	0.0470413
265.087	C17H14O3	O3	CHO	17	14	3	0	0	11	8	0.176471	0.823529	-0.0139577	266.094	-0.470588	0.612903	Aromatic	0.351446	SVOC	269.866	181.453	113750	0.0778648	171418	0.0613312	159832	0.0436892
391.14	C20H24O8	O8	CHO	20	24	8	0	0	9	1	0.4	1.2	0.158255	392.147	-0.4	0.3125	Low O unsaturated	-3.37045	LVOC	333.957	188.604	78043	0.0534227	102494	0.0366712	171262	0.0468136
375.051	C21H12O7	O7	CHO	21	12	7	0	0	16	9	0.333333	0.571429	-0.309825	376.058	0.0952381	0.714286	Condensed aromatic	-4.72147	ELVOC	312.779	183.613	NA	NA	73265.2	0.0262134	171019	0.0467471
266.046	C15H9NO4	NO4	CHNO	15	9	4	1	0	12	8	0.266667	0.6	-0.220451	267.053	-0.4	0.75	Condensed aromatic	-0.724858	LVOC	NA	NA	92417.9	0.0632627	130457	0.0466759	170725	0.0466669
240.015	C9H7NO7	NO7	CHNO	9	7	7	1	0	7	0	0.777778	0.777778	-0.0310397	241.022	0.222222	0.555556	Aromatic	-0.561207	LVOC	NA	NA	NA	NA	126738	0.0453452	170723	0.0466663
276.088	C14H15NO5	NO5	CHNO	14	15	5	1	0	8	3	0.357143	1.07143	-0.176574	277.095	-0.714286	0.428571	Low O unsaturated	-0.770979	LVOC	NA	NA	101904	0.0697563	147594	0.0528073	170613	0.0466362
427.067	C21H16O10	O10	CHO	21	16	10	0	0	14	4	0.47619	0.761905	0.016625	428.074	0.190476	0.5625	Aromatic	-6.7525	ELVOC	335.631	186.628	NA	NA	76073.3	0.0272181	170562	0.0466222
469.099	C20H22O13	O13	CHO	20	22	13	0	0	10	-3	0.65	1.1	-0.0272864	470.106	0.2	0.259259	High O unsaturated	-8.60336	ELVOC	354.259	189.437	NA	NA	81894.5	0.0293008	170555	0.0466203
431.062	C20H16O11	O11	CHO	20	16	11	0	0	13	2	0.55	0.8	-0.11866	432.069	0.3	0.517241	Aromatic	-7.30938	ELVOC	339.289	186.541	NA	NA	69102.6	0.0247241	170551	0.0466193
376.104	C18H19NO8	NO8	CHNO	18	19	8	1	0	10	2	0.444444	1.05556	-0.311882	377.111	-0.444444	0.384615	Low O unsaturated	-4.2684	ELVOC	NA	NA	53686.6	0.0367501	113439	0.0405871	170539	0.0466158
352.046	C18H11NO7	NO7	CHNO	18	11	7	1	0	14	7	0.388889	0.611111	-0.241446	353.053	-0.111111	0.703704	Condensed aromatic	-3.87704	ELVOC	NA	NA	NA	NA	82841.3	0.0296396	170423	0.0465843
396.057	C16H15NO11	NO11	CHNO	16	15	11	1	0	10	-1	0.6875	0.9375	-0.14455	397.064	0.125	0.368421	High O unsaturated	-5.78848	ELVOC	NA	NA	NA	NA	86257.2	0.0308618	170400	0.046578
346.078	C13H17NO10	NO10	CHNO	13	17	10	1	0	6	-4	0.769231	1.30769	0.0332295	347.085	-0.153846	0	Aliphatic	-3.8658	ELVOC	NA	NA	63449.4	0.0434329	90535.7	0.0323925	170188	0.0465201
323.062	C11H16O11	O11	CHO	11	16	11	0	0	4	-7	1	1.45455	-0.268989	324.069	0.545455	0	Aliphatic	-4.43907	ELVOC	331.873	182.144	NA	NA	NA	NA	170007	0.0464705
177.004	C5H6O7	O7	CHO	5	6	7	0	0	3	-4	1.4	1.2	-0.0649703	178.011	1.6	0	Aliphatic	0.417526	SVOC	292.964	173.229	NA	NA	NA	NA	170005	0.0464698
365.103	C21H18O6	O6	CHO	21	18	6	0	0	13	7	0.285714	0.857143	0.174197	366.11	-0.285714	0.555556	Aromatic	-3.15667	LVOC	315.603	186.033	NA	NA	105572	0.0377724	169895	0.04644
354.998	C10H12O12S	O12S	CHOS	10	12	12	0	1	5	-7	1.2	1.2	0.178311	356.005	0.6	0	Aliphatic	-7.53812	ELVOC	NA	NA	NA	NA	NA	NA	169565	0.0463497
310.036	C16H9NO6	NO6	CHNO	16	9	6	1	0	13	7	0.375	0.5625	-0.20417	311.043	-0.125	0.75	Condensed aromatic	-2.47405	LVOC	NA	NA	43843.6	0.0300122	106145	0.0379774	169273	0.0462699
242.067	C10H13NO6	NO6	CHNO	10	13	6	1	0	5	-1	0.6	1.3	-0.156568	243.074	-0.6	0.166667	High O unsaturated	0.015668	SVOC	NA	NA	126793	0.0867937	158773	0.0568069	169224	0.0462565
246.004	C11H5NO6	NO6	CHNO	11	5	6	1	0	10	4	0.545455	0.454545	-0.216663	247.012	0.181818	0.857143	Condensed aromatic	-0.667956	LVOC	NA	NA	40548.3	0.0277565	133503	0.0477656	169189	0.046247
451.125	C21H24O11	O11	CHO	21	24	11	0	0	10	-1	0.52381	1.14286	-0.180549	452.132	-0.0952381	0.290323	High O unsaturated	-6.61397	ELVOC	349.614	190.003	45210.2	0.0309477	99346.4	0.0355449	168620	0.0460914
485.094	C20H22O14	O14	CHO	20	22	14	0	0	10	-4	0.7	1.1	0.0653482	486.101	0.3	0.230769	High O unsaturated	-9.72574	ELVOC	357.663	189.695	NA	NA	61457.8	0.0219888	168558	0.0460743
312.088	C17H15NO5	NO5	CHNO	17	15	5	1	0	11	6	0.294118	0.882353	-0.186005	313.095	-0.588235	0.555556	Aromatic	-1.97055	LVOC	NA	NA	72617.9	0.0497091	115992	0.0415004	168411	0.0460343
387.13	C17H24O10	O10	CHO	17	24	10	0	0	6	-4	0.588235	1.41176	0.134839	388.137	-0.235294	0.0833333	High O unsaturated	-3.96892	ELVOC	340.387	187.847	117126	0.080176	167663	0.0599879	168210	0.0459794
374.073	C14H17NO11	NO11	CHNO	14	17	11	1	0	7	-4	0.785714	1.21429	0.135669	375.08	1.11e-16	0.0666667	High O unsaturated	-4.96966	ELVOC	NA	NA	NA	NA	91699.2	0.0328089	168201	0.0459768
317.082	C20H14O4	O4	CHO	20	14	4	0	0	14	10	0.2	0.7	-0.410304	318.089	-0.3	0.666667	Aromatic	-1.90887	LVOC	289.772	182.995	68962	0.0472065	101738	0.0364005	168173	0.0459692
187.098	C9H16O4	O4	CHO	9	16	4	0	0	2	-2	0.444444	1.77778	-0.0507756	188.105	-0.888889	0	Aliphatic	4.26097	IVOC	263.234	178.951	168084	0.115059	130849	0.046816	96800	0.0264598
167.071	C9H12O3	O3	CHO	9	12	3	0	0	4	1	0.333333	1.33333	-0.0439932	168.079	-0.666667	0.333333	Low O unsaturated	4.54893	IVOC	242.793	177.086	156314	0.107001	168058	0.0601291	70151.3	0.0191755
330.026	C15H9NO8	NO8	CHNO	15	9	8	1	0	12	4	0.533333	0.6	0.179683	331.033	0.133333	0.7	Condensed aromatic	-3.47809	LVOC	NA	NA	NA	NA	82670.4	0.0295784	167972	0.0459144
372.093	C15H19NO10	NO10	CHNO	15	19	10	1	0	7	-3	0.666667	1.26667	-0.436718	373.101	-0.266667	0.111111	High O unsaturated	-4.53673	ELVOC	NA	NA	52756.1	0.0361131	95751.5	0.0342587	167695	0.0458386
327.039	C10H16O10S	O10S	CHOS	10	16	10	0	1	3	-7	1	1.6	-0.186675	328.046	-0.2	0	Aliphatic	-4.60686	ELVOC	NA	NA	NA	NA	NA	NA	167685	0.0458359
214.051	C12H9NO3	NO3	CHNO	12	9	3	1	0	9	6	0.25	0.75	-0.0476522	215.058	-0.666667	0.684211	Condensed aromatic	1.14809	SVOC	NA	NA	146581	0.100339	167634	0.0599772	139091	0.0380198
300.987	C7H10O11S	O11S	CHOS	7	10	11	0	1	3	-8	1.57143	1.42857	0.196188	301.994	0.857143	0	Aliphatic	-5.86372	ELVOC	NA	NA	NA	NA	NA	NA	167515	0.0457892
277.145	C16H22O4	O4	CHO	16	22	4	0	0	6	2	0.25	1.375	0.104278	278.152	-0.875	0.285714	Low O unsaturated	1.46681	SVOC	290.324	184.603	167434	0.114614	109589	0.0392097	71488.4	0.019541
317.124	C14H22O8	O8	CHO	14	22	8	0	0	4	-4	0.571429	1.57143	-0.0715808	318.131	-0.428571	0	Aliphatic	-0.976256	LVOC	322.315	185.067	154525	0.105777	167280	0.0598508	132724	0.0362793
459.078	C18H20O14	O14	CHO	18	20	14	0	0	9	-5	0.777778	1.11111	-0.0393179	460.085	0.444444	0.181818	High O unsaturated	-9.37467	ELVOC	354.283	188.053	NA	NA	70545.4	0.0252403	167180	0.0456977
343.14	C16H24O8	O8	CHO	16	24	8	0	0	5	-3	0.5	1.5	0.0438597	344.147	-0.5	0.0833333	High O unsaturated	-1.52987	LVOC	327.501	186.734	158648	0.108599	167167	0.0598103	159418	0.0435761
479.083	C21H20O13	O13	CHO	21	20	13	0	0	12	-1	0.619048	0.952381	-0.0252566	480.09	0.285714	0.37931	High O unsaturated	-9.24573	ELVOC	352.717	189.147	NA	NA	67643.7	0.0242021	167111	0.0456789
350.067	C19H13NO6	NO6	CHNO	19	13	6	1	0	14	8	0.315789	0.684211	-0.165825	351.074	-0.315789	0.666667	Aromatic	-3.51924	LVOC	NA	NA	NA	NA	79376.8	0.0284	166877	0.045615
361.114	C15H22O10	O10	CHO	15	22	10	0	0	5	-5	0.666667	1.46667	-0.0793378	362.121	-0.133333	0	Aliphatic	-3.50787	LVOC	335.994	186.185	100367	0.068704	166679	0.0596357	157957	0.0431768
397.045	C13H18O12S	O12S	CHOS	13	18	12	0	1	5	-7	0.923077	1.38462	-0.107293	398.052	1.11e-16	0	Aliphatic	-7.58246	ELVOC	NA	NA	NA	NA	NA	NA	166515	0.045516
299.15	C15H24O6	O6	CHO	15	24	6	0	0	4	-2	0.4	1.6	0.00768845	300.157	-0.8	0.0833333	Low O unsaturated	0.763697	SVOC	310.405	185.545	166445	0.113936	159373	0.0570217	110969	0.0303329
307.097	C19H16O4	O4	CHO	19	16	4	0	0	12	8	0.210526	0.842105	-0.315209	308.105	-0.421053	0.588235	Aromatic	-1.05748	LVOC	290.931	183.561	75139	0.0514348	133499	0.0477641	166364	0.0454746
425.088	C22H18O9	O9	CHO	22	18	9	0	0	14	5	0.409091	0.818182	0.15044	426.095	0	0.542857	Aromatic	-6.02909	ELVOC	334.664	187.539	NA	NA	76046.1	0.0272084	166204	0.045431
417.046	C19H14O11	O11	CHO	19	14	11	0	0	13	2	0.578947	0.736842	-0.132959	418.054	0.421053	0.555556	Aromatic	-7.18655	ELVOC	335.741	185.231	NA	NA	72414.2	0.0259089	166168	0.0454212
447.078	C17H20O14	O14	CHO	17	20	14	0	0	8	-6	0.823529	1.17647	0.0780624	448.085	0.470588	0.1	High O unsaturated	-9.0904	ELVOC	353.634	187.564	NA	NA	NA	NA	165963	0.0453652
194.997	C5H8O6S	O6S	CHOS	5	8	6	0	1	2	-4	1.2	1.6	-0.0651292	196.004	-0.4	0	Aliphatic	0.379809	SVOC	NA	NA	NA	NA	NA	NA	165780	0.045315
356.041	C17H11NO8	NO8	CHNO	17	11	8	1	0	13	5	0.470588	0.647059	-0.00308953	357.048	-5.55e-17	0.666667	Aromatic	-4.17842	ELVOC	NA	NA	NA	NA	86220.3	0.0308486	165695	0.0452919
413.04	C13H18O13S	O13S	CHOS	13	18	13	0	1	5	-8	1	1.38462	0.0928483	414.047	0.153846	0	Aliphatic	-8.71936	ELVOC	NA	NA	NA	NA	NA	NA	165688	0.04529
461.073	C21H18O12	O12	CHO	21	18	12	0	0	13	1	0.571429	0.857143	-0.0527032	462.08	0.285714	0.466667	High O unsaturated	-8.46355	ELVOC	346.611	188.083	NA	NA	50100.3	0.0179253	165565	0.0452563
400.089	C16H19NO11	NO11	CHNO	16	19	11	1	0	8	-3	0.6875	1.1875	0.040616	401.096	-0.125	0.157895	High O unsaturated	-5.63808	ELVOC	NA	NA	45095	0.0308688	84291.9	0.0301586	165556	0.0452539
306.098	C15H17NO6	NO6	CHNO	15	17	6	1	0	8	2	0.4	1.13333	0.075956	307.106	-0.666667	0.363636	Low O unsaturated	-1.77765	LVOC	NA	NA	90600.2	0.0620185	150812	0.0539585	165508	0.0452408
415.019	C12H16O14S	O14S	CHOS	12	16	14	0	1	5	-9	1.16667	1.33333	-0.128066	416.026	0.5	0	Aliphatic	-9.87208	ELVOC	NA	NA	NA	NA	NA	NA	165012	0.0451053
251.041	C8H12O9	O9	CHO	8	12	9	0	0	3	-6	1.125	1.5	-0.152166	252.048	0.75	0	Aliphatic	-1.82574	LVOC	313.328	178.291	NA	NA	72367.4	0.0258922	164996	0.0451007
327.145	C16H24O7	O7	CHO	16	24	7	0	0	5	-2	0.4375	1.5	0.0139082	328.152	-0.625	0.12	Low O unsaturated	-0.591813	LVOC	320.643	186.402	150105	0.102751	164597	0.0588908	123842	0.0338516
420.094	C19H19NO10	NO10	CHNO	19	19	10	1	0	11	1	0.526316	1	0.158417	421.101	-0.210526	0.384615	High O unsaturated	-6.06279	ELVOC	NA	NA	NA	NA	80666.2	0.0288614	164493	0.0449634
303.003	C7H12O11S	O11S	CHOS	7	12	11	0	1	2	-9	1.57143	1.71429	0.173761	304.01	0.571429	0	Aliphatic	-5.56232	ELVOC	NA	NA	NA	NA	NA	NA	164443	0.0449497
336.051	C18H11NO6	NO6	CHNO	18	11	6	1	0	14	8	0.333333	0.611111	-0.0842133	337.059	-0.222222	0.714286	Condensed aromatic	-3.19463	LVOC	NA	NA	42928.5	0.0293858	82148.6	0.0293918	164428	0.0449456
230.031	C8H9NO7	NO7	CHNO	8	9	7	1	0	5	-2	0.875	1.125	-0.0617309	231.038	0	0.142857	High O unsaturated	-0.120045	SVOC	NA	NA	56534.6	0.0386996	117684	0.0421059	164265	0.0449011
435.078	C16H20O14	O14	CHO	16	20	14	0	0	7	-7	0.875	1.25	0.209273	436.085	0.5	0	Aliphatic	-8.82875	ELVOC	352.946	187.056	NA	NA	78433.1	0.0280624	164208	0.0448855
413.052	C20H14O10	O10	CHO	20	14	10	0	0	14	4	0.5	0.7	0.218859	414.059	0.3	0.6	Aromatic	-6.59087	ELVOC	331.852	185.322	NA	NA	60729.2	0.0217282	164201	0.0448834
422.073	C18H17NO11	NO11	CHNO	18	17	11	1	0	11	0	0.611111	0.944444	0.0390928	423.08	1.11e-16	0.391304	High O unsaturated	-6.46851	ELVOC	NA	NA	NA	NA	71353.3	0.0255293	164160	0.0448723
477.104	C22H22O12	O12	CHO	22	22	12	0	0	12	0	0.545455	1	-0.0179206	478.111	0.0909091	0.375	High O unsaturated	-8.312	ELVOC	352.22	190.028	NA	NA	71730.1	0.0256642	164108	0.0448581
197.061	C13H10O2	O2	CHO	13	10	2	0	0	9	7	0.153846	0.769231	-0.0461786	198.068	-0.461538	0.666667	Aromatic	2.62349	IVOC	231.356	177.536	150745	0.103189	163781	0.0585989	127897	0.03496
461.094	C18H22O14	O14	CHO	18	22	14	0	0	8	-6	0.777778	1.22222	-0.0928228	462.101	0.333333	0.0909091	High O unsaturated	-9.09727	ELVOC	356.25	188.75	NA	NA	91515.4	0.0327431	163635	0.0447287
399.13	C18H24O10	O10	CHO	18	24	10	0	0	7	-3	0.555556	1.33333	-0.153584	400.137	-0.222222	0.153846	High O unsaturated	-4.36542	ELVOC	341.73	188.336	81862.7	0.0560374	157016	0.0561784	163533	0.0447009
290.052	C10H13NO9	NO9	CHNO	10	13	9	1	0	5	-4	0.9	1.3	0.205825	291.059	0	0	Aliphatic	-2.18022	LVOC	NA	NA	47606.9	0.0325883	98305.7	0.0351726	163433	0.0446735
218.009	C10H5NO5	NO5	CHNO	10	5	5	1	0	9	4	0.5	0.5	-0.016513	219.017	0	0.846154	Condensed aromatic	0.426235	SVOC	NA	NA	73492.5	0.0503078	163422	0.0584703	120856	0.0330353
375.145	C20H24O7	O7	CHO	20	24	7	0	0	9	2	0.35	1.2	0.104226	376.152	-0.5	0.333333	Low O unsaturated	-2.54465	LVOC	327.825	188.243	65836.2	0.0450668	111158	0.039771	163310	0.04464
404.062	C18H15NO10	NO10	CHNO	18	15	10	1	0	12	2	0.555556	0.833333	0.163094	405.07	0	0.5	High O unsaturated	-5.8282	ELVOC	NA	NA	NA	NA	79113.7	0.0283059	163292	0.0446351
176.012	C9H4O4	O4	CHO	9	4	4	0	0	8	4	0.444444	0.444444	-0.0329524	176.011	0.444444	0.857143	Condensed aromatic	2.59657	IVOC	255.384	173.154	124075	0.0849331	163256	0.0584111	116521	0.0318503
265.056	C9H14O9	O9	CHO	9	14	9	0	0	3	-6	1	1.55556	-0.244853	266.064	0.444444	0	Aliphatic	-1.71727	LVOC	315.506	179.697	NA	NA	72769.5	0.026036	163050	0.0445689
407.135	C20H24O9	O9	CHO	20	24	9	0	0	9	0	0.45	1.2	-0.0181758	408.142	-0.3	0.290323	Low O unsaturated	-4.25894	ELVOC	339.366	188.942	59432.4	0.0406832	104880	0.0375248	162671	0.0444652
347.15	C19H24O6	O6	CHO	19	24	6	0	0	8	2	0.315789	1.26316	0.201354	348.157	-0.631579	0.3125	Low O unsaturated	-1.26017	LVOC	318.902	187.427	NA	NA	100836	0.036078	162377	0.044385
355.119	C20H20O6	O6	CHO	20	20	6	0	0	11	5	0.3	1	-0.402823	356.126	-0.4	0.470588	Low O unsaturated	-2.3436	LVOC	316.567	186.439	69225.2	0.0473867	108797	0.0389262	162129	0.0443171
258.077	C14H13NO4	NO4	CHNO	14	13	4	1	0	9	5	0.285714	0.928571	-0.0807898	259.084	-0.714286	0.545455	Aromatic	-0.171543	SVOC	NA	NA	96795.4	0.0662593	162019	0.0579685	138421	0.0378365
359.056	C21H12O6	O6	CHO	21	12	6	0	0	16	10	0.285714	0.571429	-0.0388519	360.063	0	0.722222	Condensed aromatic	-3.98887	ELVOC	305.883	183.206	NA	NA	71556.1	0.0256019	161950	0.0442682
427.052	C17H16O13	O13	CHO	17	16	13	0	0	10	-3	0.764706	0.941176	0.0406274	428.059	0.588235	0.333333	High O unsaturated	-8.44419	ELVOC	345.607	185.789	NA	NA	66032.7	0.0236257	161944	0.0442666
383.114	C21H20O7	O7	CHO	21	20	7	0	0	12	5	0.333333	0.952381	-0.0619921	384.121	-0.285714	0.485714	Low O unsaturated	-3.61187	ELVOC	325.025	187.228	58883.5	0.0403075	111074	0.0397411	161848	0.0442404
441.083	C22H18O10	O10	CHO	22	18	10	0	0	14	4	0.454545	0.818182	-0.233743	442.09	0.0909091	0.529412	Aromatic	-6.92567	ELVOC	339.258	187.872	NA	NA	69571.5	0.0248918	161633	0.0441814
292.062	C17H11NO4	NO4	CHNO	17	11	4	1	0	13	9	0.235294	0.647059	0.0741282	293.069	-0.470588	0.714286	Condensed aromatic	-1.45863	LVOC	NA	NA	59910.5	0.0410105	117458	0.0420249	161522	0.044151
268.083	C12H15NO6	NO6	CHNO	12	15	6	1	0	6	0	0.5	1.25	-0.0236867	269.09	-0.666667	0.25	High O unsaturated	-0.678232	LVOC	NA	NA	120680	0.0826087	161424	0.0577555	148359	0.0405532
404.099	C19H19NO9	NO9	CHNO	19	19	9	1	0	11	2	0.473684	1	-0.0285821	405.106	-0.315789	0.407407	Low O unsaturated	-5.35797	ELVOC	NA	NA	NA	NA	99021.6	0.0354287	161397	0.0441169
401.124	C21H22O8	O8	CHO	21	22	8	0	0	11	3	0.380952	1.04762	-0.0358991	402.131	-0.285714	0.411765	Low O unsaturated	-4.13621	ELVOC	333.283	188.338	54437.6	0.0372641	119175	0.0426392	161213	0.0440668
200.035	C11H7NO3	NO3	CHNO	11	7	3	1	0	9	6	0.272727	0.636364	-0.0477416	201.043	-0.545455	0.764706	Condensed aromatic	1.47673	SVOC	NA	NA	132560	0.0907413	161207	0.0576779	119891	0.0327716
270.077	C15H13NO4	NO4	CHNO	15	13	4	1	0	10	6	0.266667	0.866667	0.0231415	271.084	-0.666667	0.583333	Aromatic	-0.574458	LVOC	NA	NA	87902.7	0.060172	161062	0.0576259	158851	0.043421
384.072	C19H15NO8	NO8	CHNO	19	15	8	1	0	13	5	0.421053	0.789474	-0.165073	385.08	-0.210526	0.571429	Aromatic	-4.81129	ELVOC	NA	NA	44339.3	0.0303515	87780.7	0.0314068	160848	0.0439668
345.077	C21H14O5	O5	CHO	21	14	5	0	0	15	10	0.238095	0.666667	-0.253132	346.084	-0.190476	0.675676	Condensed aromatic	-3.05598	LVOC	301.422	183.8	54665.2	0.0374199	97172.6	0.0347672	160762	0.0439433
273.113	C16H18O4	O4	CHO	16	18	4	0	0	8	4	0.25	1.125	0.0437547	274.121	-0.625	0.428571	Low O unsaturated	0.912006	SVOC	286.693	183.186	105505	0.0722214	160714	0.0575014	140566	0.0384229
337.108	C20H18O5	O5	CHO	20	18	5	0	0	12	7	0.25	0.9	-0.0206165	338.115	-0.4	0.542857	Aromatic	-1.94347	LVOC	305.78	185.231	NA	NA	123511	0.0441905	160664	0.0439167
246.077	C13H13NO4	NO4	CHNO	13	13	4	1	0	8	4	0.307692	1	-0.0146296	247.084	-0.769231	0.5	Low O unsaturated	0.23008	SVOC	NA	NA	115137	0.0788148	160323	0.0573617	133385	0.0364599
317.045	C19H10O5	O5	CHO	19	10	5	0	0	15	10	0.263158	0.526316	-0.312416	318.053	0	0.757576	Condensed aromatic	-2.50087	LVOC	291.207	180.993	60789.9	0.0416124	106912	0.0382519	160288	0.043814
367.034	C12H16O11S	O11S	CHOS	12	16	11	0	1	5	-6	0.916667	1.33333	-0.247388	368.041	0	0	Aliphatic	-6.41329	ELVOC	NA	NA	NA	NA	NA	NA	160164	0.0437799
386.088	C19H17NO8	NO8	CHNO	19	17	8	1	0	12	4	0.421053	0.894737	-0.136627	387.095	-0.315789	0.5	Low O unsaturated	-4.73609	ELVOC	NA	NA	NA	NA	97011.7	0.0347096	160090	0.0437597
379.082	C21H16O7	O7	CHO	21	16	7	0	0	14	7	0.333333	0.761905	-0.367598	380.089	-0.0952381	0.6	Aromatic	-4.16667	ELVOC	319.675	185.574	NA	NA	108522	0.0388278	159996	0.0437341
288.015	C13H7NO7	NO7	CHNO	13	7	7	1	0	11	4	0.538462	0.538462	-0.186796	289.022	0.153846	0.764706	Condensed aromatic	-2.07299	LVOC	NA	NA	NA	NA	120977	0.0432842	159993	0.0437333
419.135	C21H24O9	O9	CHO	21	24	9	0	0	10	1	0.428571	1.14286	-0.0657307	420.142	-0.285714	0.333333	Low O unsaturated	-4.72275	ELVOC	340.638	189.374	58954.1	0.0403558	86221.7	0.0308491	159988	0.0437318
310.072	C17H13NO5	NO5	CHNO	17	13	5	1	0	12	7	0.294118	0.764706	-0.371204	311.079	-0.470588	0.62963	Aromatic	-2.04575	LVOC	NA	NA	60386.1	0.0413361	121385	0.04343	159949	0.0437211
360.057	C13H15NO11	NO11	CHNO	13	15	11	1	0	7	-4	0.846154	1.15385	0.128035	361.065	0.153846	0.0769231	High O unsaturated	-4.67832	ELVOC	NA	NA	NA	NA	67581.1	0.0241797	159916	0.043712
230.009	C11H5NO5	NO5	CHNO	11	5	5	1	0	10	5	0.454545	0.454545	-0.017608	231.017	-5.55e-17	0.866667	Condensed aromatic	0.036793	SVOC	NA	NA	83788.2	0.0573554	159784	0.0571689	142820	0.0390392
312.999	C15H6O8	O8	CHO	15	6	8	0	0	13	5	0.533333	0.4	-0.323963	314.006	0.666667	0.818182	Condensed aromatic	-3.60191	ELVOC	302.482	178.192	NA	NA	81690.6	0.0292279	159612	0.0436291
289.051	C18H10O4	O4	CHO	18	10	4	0	0	14	10	0.222222	0.555556	0.200657	290.058	-0.111111	0.75	Condensed aromatic	-1.32022	LVOC	279.226	180.213	77094.7	0.0527736	141513	0.0506317	159582	0.0436208
322.072	C18H13NO5	NO5	CHNO	18	13	5	1	0	13	8	0.277778	0.722222	0.0214238	323.079	-0.444444	0.655172	Aromatic	-2.44805	LVOC	NA	NA	57596.8	0.0394267	110075	0.0393836	159531	0.0436069
471.114	C20H24O13	O13	CHO	20	24	13	0	0	9	-4	0.65	1.2	-0.174692	472.122	0.1	0.185185	High O unsaturated	-8.32596	ELVOC	356.254	190.114	NA	NA	81962.7	0.0293252	159525	0.0436053
284.02	C14H7NO6	NO6	CHNO	14	7	6	1	0	12	6	0.428571	0.5	-0.363531	285.027	0	0.8	Condensed aromatic	-1.75987	LVOC	NA	NA	NA	NA	108201	0.038713	159415	0.0435752
339.145	C17H24O7	O7	CHO	17	24	7	0	0	6	-1	0.411765	1.41176	0.185909	340.152	-0.588235	0.185185	Low O unsaturated	-1.06307	LVOC	322.594	186.89	129929	0.0889404	159274	0.0569863	154607	0.0422609
393.098	C22H18O7	O7	CHO	22	18	7	0	0	14	7	0.318182	0.818182	-0.243069	394.105	-0.181818	0.567568	Aromatic	-4.40938	ELVOC	323.707	186.805	NA	NA	83503	0.0298763	158914	0.0434383
309.134	C16H22O6	O6	CHO	16	22	6	0	0	6	0	0.375	1.375	-0.324778	310.142	-0.625	0.230769	Low O unsaturated	-0.00360127	SVOC	311.15	185.407	117196	0.0802238	150944	0.0540059	158876	0.043428
310.093	C14H17NO7	NO7	CHNO	14	17	7	1	0	7	0	0.5	1.21429	0.135443	311.101	-0.571429	0.263158	High O unsaturated	-2.0835	LVOC	NA	NA	99253.9	0.0679422	137242	0.0491035	158806	0.0434087
415.125	C18H24O11	O11	CHO	18	24	11	0	0	7	-4	0.611111	1.33333	-0.111774	416.132	-0.111111	0.12	High O unsaturated	-5.41475	ELVOC	346.352	188.624	87807.3	0.0601066	143323	0.0512793	158737	0.04339
234.004	C10H5NO6	NO6	CHNO	10	5	6	1	0	9	3	0.6	0.5	0.00277772	235.012	0.2	0.833333	Condensed aromatic	-0.285132	SVOC	NA	NA	70470.3	0.048239	158473	0.0566997	137271	0.0375224
228.067	C13H11NO3	NO3	CHNO	13	11	3	1	0	9	6	0.230769	0.846154	-0.0624817	229.074	-0.769231	0.619048	Aromatic	0.818193	SVOC	NA	NA	120249	0.0823139	158325	0.0566467	131764	0.0360169
360.109	C18H19NO7	NO7	CHNO	18	19	7	1	0	10	3	0.388889	1.05556	0.329067	361.116	-0.555556	0.407407	Low O unsaturated	-3.57624	ELVOC	NA	NA	55357.5	0.0378938	107982	0.0386346	158319	0.0432757
424.089	C18H19NO11	NO11	CHNO	18	19	11	1	0	10	-1	0.611111	1.05556	0.0116721	425.096	-0.111111	0.304348	High O unsaturated	-6.39331	ELVOC	NA	NA	NA	NA	84243.2	0.0301412	158227	0.0432504
475.088	C22H20O12	O12	CHO	22	20	12	0	0	13	1	0.545455	0.909091	-0.240061	476.095	0.181818	0.4375	High O unsaturated	-8.5894	ELVOC	349.839	189.283	NA	NA	61313.6	0.0219373	158191	0.0432408
402.083	C19H17NO9	NO9	CHNO	19	17	9	1	0	12	3	0.473684	0.894737	-0.137036	403.09	-0.210526	0.481481	Low O unsaturated	-5.43317	ELVOC	NA	NA	NA	NA	91541.4	0.0327524	157950	0.0431747
497.094	C21H22O14	O14	CHO	21	22	14	0	0	11	-3	0.666667	1.04762	0.00181052	498.101	0.285714	0.285714	High O unsaturated	-10.0665	ELVOC	358.317	190.143	NA	NA	62415	0.0223313	157938	0.0431714
232.046	C8H11NO7	NO7	CHNO	8	11	7	1	0	4	-3	0.875	1.375	-0.190048	233.053	-0.25	0	Aliphatic	-0.0448453	SVOC	NA	NA	53256.4	0.0364556	117942	0.0421981	157883	0.0431564
411.109	C22H20O8	O8	CHO	22	20	8	0	0	13	5	0.363636	0.909091	0.0533922	412.116	-0.181818	0.5	Low O unsaturated	-4.91099	ELVOC	332.161	187.989	NA	NA	78247.8	0.0279961	157802	0.0431344
280.997	C8H10O9S	O9S	CHOS	8	10	9	0	1	4	-5	1.125	1.25	-0.0788264	282.005	0.25	0	Aliphatic	-3.72599	ELVOC	NA	NA	NA	NA	NA	NA	157583	0.0430745
412.089	C17H19NO11	NO11	CHNO	17	19	11	1	0	9	-2	0.647059	1.11765	0.0769252	413.096	-0.117647	0.238095	High O unsaturated	-6.0144	ELVOC	NA	NA	NA	NA	79517.1	0.0284502	157412	0.0430277
511.109	C22H24O14	O14	CHO	22	24	14	0	0	11	-3	0.636364	1.09091	-0.0993917	512.117	0.181818	0.266667	High O unsaturated	-10.1456	ELVOC	361.114	191.271	NA	NA	68562.6	0.0245308	157294	0.0429955
277.087	C18H14O3	O3	CHO	18	14	3	0	0	12	9	0.166667	0.777778	-0.026526	278.094	-0.444444	0.636364	Aromatic	-0.235531	SVOC	272.22	181.815	96805.1	0.0662659	148331	0.0530711	157229	0.0429777
391.031	C17H12O11	O11	CHO	17	12	11	0	0	12	1	0.647059	0.705882	0.0396388	392.038	0.588235	0.565217	Aromatic	-6.71142	ELVOC	331.691	183.439	NA	NA	63916.3	0.0228685	157173	0.0429623
463.125	C22H24O11	O11	CHO	22	24	11	0	0	11	0	0.5	1.09091	-0.157085	464.132	-0.0909091	0.333333	High O unsaturated	-7.04087	ELVOC	350.599	190.431	NA	NA	76657.8	0.0274272	157108	0.0429447
337.078	C12H18O11	O11	CHO	12	18	11	0	0	4	-7	0.916667	1.5	-0.211672	338.085	0.333333	0	Aliphatic	-4.37455	ELVOC	334.352	183.443	NA	NA	60324.1	0.0215832	156951	0.0429017
335.15	C18H24O6	O6	CHO	18	24	6	0	0	7	1	0.333333	1.33333	-0.362972	336.157	-0.666667	0.266667	Low O unsaturated	-0.739474	LVOC	316.958	186.985	92977.1	0.0636455	107383	0.0384202	156674	0.0428259
418.078	C19H17NO10	NO10	CHNO	19	17	10	1	0	12	2	0.526316	0.894737	-0.156311	419.085	-0.105263	0.461538	High O unsaturated	-6.13799	ELVOC	NA	NA	NA	NA	81904.8	0.0293045	156672	0.0428253
355.01	C17H8O9	O9	CHO	17	8	9	0	0	14	5	0.529412	0.470588	-0.106476	356.017	0.588235	0.76	Condensed aromatic	-5.16055	ELVOC	313.812	180.583	NA	NA	68432.8	0.0244844	156483	0.0427738
312.987	C8H10O11S	O11S	CHOS	8	10	11	0	1	4	-7	1.375	1.25	-0.0113423	313.994	0.75	0	Aliphatic	-6.1031	ELVOC	NA	NA	NA	NA	NA	NA	156420	0.0427567
318.098	C16H17NO6	NO6	CHNO	16	17	6	1	0	9	3	0.375	1.0625	-0.429584	319.105	-0.625	0.416667	Low O unsaturated	-2.17325	LVOC	NA	NA	71752.5	0.0491167	124977	0.0447153	156357	0.0427394
339.003	C10H12O11S	O11S	CHOS	10	12	11	0	1	5	-6	1.1	1.2	0.0535394	340.01	0.4	0	Aliphatic	-6.36485	ELVOC	NA	NA	NA	NA	NA	NA	156310	0.0427265
211.098	C11H16O4	O4	CHO	11	16	4	0	0	4	0	0.363636	1.45455	-0.0177643	212.105	-0.727273	0.222222	Low O unsaturated	3.29537	IVOC	270.672	180.068	156124	0.106872	140700	0.0503407	89797.5	0.0245457
399.036	C19H12O10	O10	CHO	19	12	10	0	0	14	4	0.526316	0.631579	-0.418258	400.043	0.421053	0.642857	Aromatic	-6.44199	ELVOC	327.883	183.942	NA	NA	72399.9	0.0259038	156115	0.0426733
336.109	C16H19NO7	NO7	CHNO	16	19	7	1	0	8	1	0.4375	1.1875	0.196811	337.116	-0.625	0.304348	Low O unsaturated	-2.78846	LVOC	NA	NA	71824.8	0.0491662	117923	0.0421913	156027	0.0426491
149.061	C9H10O2	O2	CHO	9	10	2	0	0	5	3	0.222222	1.11111	-0.0214677	150.068	-0.666667	0.5	Low O unsaturated	4.95205	IVOC	215.246	175.839	147259	0.100803	155934	0.0557912	92131.6	0.0251837
318.047	C11H13NO10	NO10	CHNO	11	13	10	1	0	6	-4	0.909091	1.18182	0.13693	319.054	0.181818	0	Aliphatic	-3.28563	LVOC	NA	NA	NA	NA	66267.5	0.0237097	155686	0.0425558
139.004	C6H4O4	O4	CHO	6	4	4	0	0	5	1	0.666667	0.666667	-0.0485599	140.011	0.666667	0.75	Aromatic	3.83349	IVOC	252.502	171.874	110335	0.0755278	155547	0.0556529	116746	0.0319118
185.024	C11H6O3	O3	CHO	11	6	3	0	0	9	6	0.272727	0.545455	-0.0648563	186.032	0	0.789474	Condensed aromatic	2.65324	IVOC	243.461	174.881	134594	0.0921332	155453	0.0556191	88464.9	0.0241814
427.103	C22H20O9	O9	CHO	22	20	9	0	0	13	4	0.409091	0.909091	-0.166002	428.111	-0.0909091	0.485714	Low O unsaturated	-5.75169	ELVOC	337.296	188.342	NA	NA	85783.7	0.0306924	155346	0.0424631
388.089	C15H19NO11	NO11	CHNO	15	19	11	1	0	7	-4	0.733333	1.26667	0.359196	389.096	-0.133333	0.0588235	High O unsaturated	-5.26466	ELVOC	NA	NA	NA	NA	80977.4	0.0289727	155323	0.0424566
347.093	C21H16O5	O5	CHO	21	16	5	0	0	14	9	0.238095	0.761905	0.170416	348.1	-0.285714	0.621622	Aromatic	-2.77858	LVOC	304.623	184.738	40477.8	0.0277082	91998.4	0.0329159	155277	0.0424441
241.014	C13H6O5	O5	CHO	13	6	5	0	0	11	6	0.384615	0.461538	0.0120325	242.022	0.307692	0.809524	Condensed aromatic	0.0904593	SVOC	276.108	176.412	NA	NA	NA	NA	155247	0.0424358
409.057	C21H14O9	O9	CHO	21	14	9	0	0	15	6	0.428571	0.666667	0.0254244	410.064	0.190476	0.636364	Aromatic	-6.10975	ELVOC	327.717	185.368	NA	NA	51034.2	0.0182594	155215	0.0424271
373.045	C11H18O12S	O12S	CHOS	11	18	12	0	1	3	-9	1.09091	1.63636	0.143414	374.052	-2.22e-16	0	Aliphatic	-6.93109	ELVOC	NA	NA	NA	NA	NA	NA	155122	0.0424019
234.077	C12H13NO4	NO4	CHNO	12	13	4	1	0	7	3	0.333333	1.08333	-0.0337496	235.084	-0.833333	0.444444	Low O unsaturated	0.630168	SVOC	NA	NA	118418	0.0810606	154953	0.0554404	116128	0.031743
436.089	C19H19NO11	NO11	CHNO	19	19	11	1	0	11	0	0.578947	1	0.0517097	437.096	-0.105263	0.36	High O unsaturated	-6.77456	ELVOC	NA	NA	NA	NA	79075.3	0.0282922	154864	0.0423311
261.056	C17H10O3	O3	CHO	17	10	3	0	0	13	10	0.176471	0.588235	-0.0407959	262.063	-0.235294	0.741935	Condensed aromatic	-0.203354	SVOC	263.336	179.407	110874	0.0758962	154589	0.0553099	149100	0.0407558
487.109	C20H24O14	O14	CHO	20	24	14	0	0	9	-5	0.7	1.2	0.0533761	488.117	0.2	0.153846	High O unsaturated	-9.44834	ELVOC	359.657	190.371	NA	NA	70605.8	0.0252619	154345	0.0421894
395.041	C20H12O9	O9	CHO	20	12	9	0	0	15	6	0.45	0.6	-0.0272124	396.048	0.3	0.677419	Condensed aromatic	-5.92334	ELVOC	323.481	183.99	NA	NA	60204.3	0.0215403	154252	0.042164
493.099	C22H22O13	O13	CHO	22	22	13	0	0	12	-1	0.590909	1	-0.099473	494.106	0.181818	0.354839	High O unsaturated	-9.34809	ELVOC	355.709	190.308	NA	NA	57312.1	0.0205056	154117	0.0421271
495.114	C22H24O13	O13	CHO	22	24	13	0	0	11	-2	0.590909	1.09091	0.15865	496.122	0.0909091	0.290323	High O unsaturated	-9.07069	ELVOC	357.883	191.005	NA	NA	62694	0.0224311	153966	0.0420858
268.025	C14H7NO5	NO5	CHNO	14	7	5	1	0	12	7	0.357143	0.5	-0.104468	269.032	-0.142857	0.809524	Condensed aromatic	-1.07178	LVOC	NA	NA	52163.5	0.0357075	113888	0.0407477	153962	0.0420848
353.015	C14H10O11	O11	CHO	14	10	11	0	0	10	-1	0.785714	0.714286	0.152401	354.022	0.857143	0.529412	Aromatic	-6.00853	ELVOC	327.716	181.106	NA	NA	57608	0.0206114	153855	0.0420555
360.036	C16H11NO9	NO9	CHNO	16	11	9	1	0	12	3	0.5625	0.6875	0.0490229	361.043	0.125	0.619048	Aromatic	-4.49858	ELVOC	NA	NA	NA	NA	79950.3	0.0286052	153743	0.042025
275.071	C18H12O3	O3	CHO	18	12	3	0	0	13	10	0.166667	0.666667	-0.329551	276.079	-0.333333	0.69697	Condensed aromatic	-0.512931	SVOC	269.039	180.828	99664.3	0.0682231	138447	0.0495346	153689	0.0420101
242.982	C5H8O9S	O9S	CHOS	5	8	9	0	1	2	-7	1.8	1.6	-0.0232528	243.989	0.8	7	Aromatic	-3.27554	LVOC	NA	NA	NA	NA	NA	NA	153519	0.0419635
204.067	C11H11NO3	NO3	CHNO	11	11	3	1	0	7	4	0.272727	1	-0.0480235	205.074	-0.909091	0.529412	Aromatic	1.62713	SVOC	NA	NA	139061	0.0951913	153518	0.0549268	93104.1	0.0254495
479.12	C22H24O12	O12	CHO	22	24	12	0	0	11	-1	0.545455	1.09091	0.0817124	480.127	0	0.3125	High O unsaturated	-8.0346	ELVOC	354.393	190.725	36879.5	0.0252451	78885.2	0.0282242	153513	0.0419621
368.099	C16H19NO9	NO9	CHNO	16	19	9	1	0	8	-1	0.5625	1.1875	-0.276285	369.106	-0.375	0.238095	High O unsaturated	-4.19778	ELVOC	NA	NA	64823.4	0.0443735	120898	0.0432556	153274	0.0418967
205.072	C8H14O6	O6	CHO	8	14	6	0	0	2	-4	0.75	1.75	-0.0336468	206.079	-0.25	0	Aliphatic	2.27038	SVOC	286.13	178.268	145136	0.0993501	152877	0.0546976	104210	0.0284853
352.083	C19H15NO6	NO6	CHNO	19	15	6	1	0	13	7	0.315789	0.789474	0.190864	353.09	-0.421053	0.6	Aromatic	-3.44404	LVOC	NA	NA	NA	NA	101507	0.0363178	152871	0.0417865
394.114	C18H21NO9	NO9	CHNO	18	21	9	1	0	9	0	0.5	1.16667	-0.346473	395.121	-0.444444	0.28	High O unsaturated	-4.89403	ELVOC	NA	NA	51936.7	0.0355522	95800.2	0.0342761	152617	0.0417171
147.009	C8H4O3	O3	CHO	8	4	3	0	0	7	4	0.375	0.5	-0.00238081	148.016	0.25	0.846154	Condensed aromatic	3.94596	IVOC	234.909	172.402	101616	0.0695591	152161	0.0544414	65061	0.0177841
315.145	C15H24O7	O7	CHO	15	24	7	0	0	4	-3	0.466667	1.6	-0.0759968	316.152	-0.666667	0.0434783	Low O unsaturated	-0.134419	SVOC	318.565	185.893	152109	0.104123	125899	0.0450452	106938	0.029231
339.039	C11H16O10S	O10S	CHOS	11	16	10	0	1	4	-6	0.909091	1.45455	-0.233011	340.046	-0.181818	0	Aliphatic	-4.94285	ELVOC	NA	NA	NA	NA	NA	NA	152010	0.0415511
300.088	C16H15NO5	NO5	CHNO	16	15	5	1	0	10	5	0.3125	0.9375	0.119798	301.095	-0.625	0.52	Aromatic	-1.56936	LVOC	NA	NA	92703.5	0.0634582	142682	0.0510498	151987	0.0415447
366.062	C19H13NO7	NO7	CHNO	19	13	7	1	0	14	7	0.368421	0.684211	-0.136316	367.069	-0.210526	0.655172	Aromatic	-4.19804	ELVOC	NA	NA	NA	NA	84125.8	0.0300992	151591	0.0414366
491.12	C23H24O12	O12	CHO	23	24	12	0	0	12	0	0.521739	1.04348	0.0933581	492.127	0	0.352941	High O unsaturated	-8.45046	ELVOC	355.24	191.144	NA	NA	66219.7	0.0236926	151582	0.041434
264.088	C13H15NO5	NO5	CHNO	13	15	5	1	0	7	2	0.384615	1.15385	0.0266957	265.095	-0.769231	0.368421	Low O unsaturated	-0.374243	SVOC	NA	NA	112217	0.076816	151496	0.0542033	138469	0.0378497
391.046	C21H12O8	O8	CHO	21	12	8	0	0	16	8	0.380952	0.571429	-0.160211	392.053	0.190476	0.705882	Condensed aromatic	-5.52321	ELVOC	318.752	183.991	NA	NA	58388.9	0.0208908	151320	0.0413626
263.035	C16H8O4	O4	CHO	16	8	4	0	0	13	9	0.25	0.5	-0.226016	264.042	0	0.785714	Condensed aromatic	-0.474994	SVOC	272.018	178.343	91239.3	0.0624559	143111	0.0512034	151203	0.0413304
445.114	C22H22O10	O10	CHO	22	22	10	0	0	12	2	0.454545	1	0.162093	446.121	-0.0909091	0.411765	Low O unsaturated	-6.37087	ELVOC	344.27	189.421	51138.4	0.0350057	102927	0.0368261	151165	0.0413201
297.113	C18H18O4	O4	CHO	18	18	4	0	0	10	6	0.222222	1	0.0785896	298.121	-0.555556	0.5	Low O unsaturated	-0.210619	SVOC	291.358	184.01	82352.9	0.0563729	143729	0.0514244	151039	0.0412858
216.067	C12H11NO3	NO3	CHNO	12	11	3	1	0	8	5	0.25	0.916667	-0.0495218	217.074	-0.833333	0.578947	Aromatic	1.22329	SVOC	NA	NA	118780	0.0813084	150885	0.0539847	114548	0.0313112
375.087	C22H16O6	O6	CHO	22	16	6	0	0	15	9	0.272727	0.727273	0.0786483	376.095	-0.181818	0.631579	Aromatic	-3.97605	ELVOC	314.044	185.525	NA	NA	88529.9	0.0316749	150808	0.0412225
199.076	C13H12O2	O2	CHO	13	12	2	0	0	8	6	0.153846	0.923077	-0.0118045	200.084	-0.615385	0.583333	Aromatic	2.90089	IVOC	233.838	178.525	138790	0.0950061	150782	0.0539479	137955	0.0377092
320.056	C18H11NO5	NO5	CHNO	18	11	5	1	0	14	9	0.277778	0.611111	-0.146068	321.064	-0.333333	0.724138	Condensed aromatic	-2.52325	LVOC	NA	NA	40365.3	0.0276312	93509.7	0.0334566	150401	0.0411114
483.114	C21H24O13	O13	CHO	21	24	13	0	0	10	-3	0.619048	1.14286	0.00124194	484.122	0.0952381	0.241379	High O unsaturated	-8.69093	ELVOC	357.088	190.567	NA	NA	76011.8	0.0271961	150362	0.0411007
473.094	C19H22O14	O14	CHO	19	22	14	0	0	9	-5	0.736842	1.15789	-0.19457	474.101	0.315789	0.166667	High O unsaturated	-9.40213	ELVOC	356.975	189.232	NA	NA	69019	0.0246941	149844	0.0409591
391.082	C22H16O7	O7	CHO	22	16	7	0	0	15	8	0.318182	0.727273	0.088856	392.09	-0.0909091	0.621622	Aromatic	-4.68678	ELVOC	320.765	185.934	NA	NA	81700.5	0.0292314	149694	0.040918
285.113	C17H18O4	O4	CHO	17	18	4	0	0	9	5	0.235294	1.05882	-0.278135	286.12	-0.588235	0.466667	Low O unsaturated	0.353669	SVOC	289.094	183.606	108509	0.0742773	144060	0.0515427	149406	0.0408393
388.104	C19H19NO8	NO8	CHNO	19	19	8	1	0	11	3	0.421053	1	-0.00334962	389.111	-0.421053	0.428571	Low O unsaturated	-4.66089	ELVOC	NA	NA	52132.2	0.035686	98095.9	0.0350975	149268	0.0408015
447.13	C22H24O10	O10	CHO	22	24	10	0	0	11	1	0.454545	1.09091	-0.120659	448.137	-0.181818	0.352941	Low O unsaturated	-6.09347	ELVOC	346.444	190.121	53645	0.0367216	73948.3	0.0264578	149028	0.0407359
212.035	C12H7NO3	NO3	CHNO	12	7	3	1	0	10	7	0.25	0.583333	-0.0528214	213.043	-0.5	0.789474	Condensed aromatic	1.07289	SVOC	NA	NA	124846	0.0854605	146220	0.0523158	148899	0.0407008
261.098	C11H18O7	O7	CHO	11	18	7	0	0	3	-4	0.636364	1.63636	0.0419383	262.105	-0.363636	0	Aliphatic	0.678059	SVOC	305.706	181.781	148808	0.101863	147498	0.052773	105014	0.0287051
373.02	C17H10O10	O10	CHO	17	10	10	0	0	13	3	0.588235	0.588235	0.0246635	374.027	0.588235	0.666667	Aromatic	-5.91072	ELVOC	323.398	182.089	NA	NA	62279.9	0.022283	148766	0.0406643
370.093	C19H17NO7	NO7	CHNO	19	17	7	1	0	12	5	0.368421	0.894737	-0.264528	371.1	-0.421053	0.517241	Aromatic	-4.04764	ELVOC	NA	NA	NA	NA	94478	0.0338031	148681	0.0406412
272.077	C11H15NO7	NO7	CHNO	11	15	7	1	0	5	-2	0.636364	1.36364	-0.278229	273.085	-0.545455	0.0769231	High O unsaturated	-1.00831	LVOC	NA	NA	82019.2	0.0561445	130289	0.0466157	148647	0.040632
243.103	C15H16O3	O3	CHO	15	16	3	0	0	8	5	0.2	1.06667	-0.0431916	244.11	-0.666667	0.481481	Low O unsaturated	1.79053	SVOC	266.94	181.53	104668	0.071648	148270	0.0530491	103834	0.0283824
329.139	C19H22O5	O5	CHO	19	22	5	0	0	9	4	0.263158	1.15789	0.0862856	330.147	-0.631579	0.393939	Low O unsaturated	-0.836474	LVOC	308.403	186.341	82183	0.0562566	102830	0.0367914	147821	0.0404062
317.139	C18H22O5	O5	CHO	18	22	5	0	0	8	3	0.277778	1.22222	0.104213	318.147	-0.666667	0.354839	Low O unsaturated	-0.2905	SVOC	306.321	185.918	87905.4	0.0601738	116089	0.0415352	147671	0.0403651
225.113	C12H18O4	O4	CHO	12	18	4	0	0	4	0	0.333333	1.5	-0.0428673	226.12	-0.833333	0.2	Low O unsaturated	3.06353	IVOC	275.297	181.303	147604	0.101039	134293	0.0480485	80901.8	0.0221141
361.008	C9H14O13S	O13S	CHOS	9	14	13	0	1	3	-10	1.44444	1.55556	-0.0210522	362.016	0.666667	0	Aliphatic	-8.16978	ELVOC	NA	NA	NA	NA	NA	NA	147533	0.0403273
382.057	C19H13NO8	NO8	CHNO	19	13	8	1	0	14	6	0.421053	0.684211	-0.211879	383.064	-0.105263	0.642857	Aromatic	-4.88649	ELVOC	NA	NA	NA	NA	67363.6	0.0241019	147403	0.0402918
330.098	C17H17NO6	NO6	CHNO	17	17	6	1	0	10	4	0.352941	1	0.0498336	331.106	-0.588235	0.461538	Low O unsaturated	-2.57045	LVOC	NA	NA	65425.5	0.0447857	120486	0.0431083	147395	0.0402896
386.052	C18H13NO9	NO9	CHNO	18	13	9	1	0	13	4	0.5	0.722222	0.0972668	387.059	0	0.6	Aromatic	-5.19483	ELVOC	NA	NA	NA	NA	67699.5	0.0242221	147111	0.040212
405.104	C16H22O12	O12	CHO	16	22	12	0	0	6	-6	0.75	1.375	0.101085	406.111	0.125	0	Aliphatic	-6.12876	ELVOC	346.753	187.242	57994.6	0.039699	108707	0.0388941	146978	0.0401758
319.103	C13H20O9	O9	CHO	13	20	9	0	0	4	-5	0.692308	1.53846	-0.0496704	320.111	-0.153846	0	Aliphatic	-1.97431	LVOC	325.659	184.168	93057	0.0637002	146784	0.0525175	143592	0.03925
338.031	C17H9NO7	NO7	CHNO	17	9	7	1	0	14	7	0.411765	0.529412	-0.220098	339.038	-5.55e-17	0.76	Condensed aromatic	-3.55752	ELVOC	NA	NA	NA	NA	61788.9	0.0221073	146775	0.0401201
400.067	C19H15NO9	NO9	CHNO	19	15	9	1	0	13	4	0.473684	0.789474	0.0291201	401.075	-0.105263	0.555556	Aromatic	-5.50837	ELVOC	NA	NA	NA	NA	78930.2	0.0282402	146772	0.0401193
223.076	C15H12O2	O2	CHO	15	12	2	0	0	10	8	0.133333	0.8	-0.0537932	224.084	-0.533333	0.642857	Aromatic	1.7072	SVOC	240.671	179.298	135588	0.0928142	146739	0.0525013	125907	0.0344159
398.088	C20H17NO8	NO8	CHNO	20	17	8	1	0	13	5	0.4	0.85	0.206613	399.095	-0.3	0.533333	Aromatic	-5.13012	ELVOC	NA	NA	NA	NA	77171.4	0.027611	146598	0.0400717
335.02	C18H8O7	O7	CHO	18	8	7	0	0	15	8	0.388889	0.444444	-0.35968	336.027	0.333333	0.793103	Condensed aromatic	-3.76574	ELVOC	301.757	180.238	NA	NA	69231	0.02477	146515	0.040049
465.068	C20H18O13	O13	CHO	20	18	13	0	0	12	-1	0.65	0.9	0.205132	466.075	0.4	0.407407	High O unsaturated	-9.15816	ELVOC	349.661	187.941	NA	NA	56347.7	0.0201605	146491	0.0400426
409.093	C22H18O8	O8	CHO	22	18	8	0	0	14	6	0.363636	0.818182	-0.061233	410.1	-0.0909091	0.555556	Aromatic	-5.18839	ELVOC	329.529	187.184	NA	NA	79219.7	0.0283438	146424	0.0400242
324.088	C18H15NO5	NO5	CHNO	18	15	5	1	0	12	7	0.277778	0.833333	0.280942	325.095	-0.555556	0.586207	Aromatic	-2.37285	LVOC	NA	NA	60486	0.0414044	119813	0.0428675	146070	0.0399274
402.068	C15H17NO12	NO12	CHNO	15	17	12	1	0	8	-4	0.8	1.13333	-0.215013	403.075	0.133333	0.125	High O unsaturated	-6.0738	ELVOC	NA	NA	NA	NA	NA	NA	146060	0.0399248
166.015	C7H5NO4	NO4	CHNO	7	5	4	1	0	6	2	0.571429	0.714286	-0.0397555	167.022	-0.285714	0.75	Aromatic	2.29214	SVOC	NA	NA	109686	0.0750831	146026	0.0522462	115494	0.0315697
483.078	C20H20O14	O14	CHO	20	20	14	0	0	11	-3	0.7	1	-0.180716	484.085	0.4	0.307692	High O unsaturated	-10.0031	ELVOC	355.478	188.975	NA	NA	61539.7	0.0220181	145787	0.0398501
343.061	C21H12O5	O5	CHO	21	12	5	0	0	16	11	0.238095	0.571429	-0.073602	344.068	-0.0952381	0.72973	Condensed aromatic	-3.33338	LVOC	297.727	182.768	NA	NA	82995.4	0.0296947	145770	0.0398454
298.093	C13H17NO7	NO7	CHNO	13	17	7	1	0	6	-1	0.538462	1.30769	-0.277933	299.1	-0.615385	0.176471	High O unsaturated	-1.69699	LVOC	NA	NA	84730.1	0.0580002	132957	0.0475703	145698	0.0398258
459.114	C19H24O13	O13	CHO	19	24	13	0	0	8	-5	0.684211	1.26316	-0.122083	460.122	0.105263	0.12	High O unsaturated	-7.97717	ELVOC	355.377	189.644	NA	NA	94020.3	0.0336393	145642	0.0398106
377.03	C20H10O8	O8	CHO	20	10	8	0	0	16	8	0.4	0.5	-0.105429	378.038	0.3	0.75	Condensed aromatic	-5.31225	ELVOC	313.893	182.521	NA	NA	51584.4	0.0184562	145546	0.0397843
255.103	C16H16O3	O3	CHO	16	16	3	0	0	9	6	0.1875	1	0.0346919	256.11	-0.625	0.517241	Aromatic	1.21195	SVOC	269.785	181.94	95513.9	0.0653821	145541	0.0520728	117768	0.0321912
440.083	C18H19NO12	NO12	CHNO	18	19	12	1	0	10	-2	0.666667	1.05556	0.0668055	441.091	-1.11e-16	0.272727	High O unsaturated	-7.11507	ELVOC	NA	NA	NA	NA	62720.2	0.0224405	145404	0.0397454
173.082	C8H14O4	O4	CHO	8	14	4	0	0	2	-2	0.5	1.75	-0.070198	174.089	-0.75	0	Aliphatic	4.43113	IVOC	258.452	177.648	145255	0.0994311	122686	0.0438956	77974.2	0.0213138
414.068	C16H17NO12	NO12	CHNO	16	17	12	1	0	9	-3	0.75	1.0625	0.154806	415.075	0.125	0.222222	High O unsaturated	-6.44297	ELVOC	NA	NA	NA	NA	63315.5	0.0226535	144951	0.0396215
222.077	C11H13NO4	NO4	CHNO	11	13	4	1	0	6	2	0.363636	1.18182	-0.0171112	223.084	-0.909091	0.375	Low O unsaturated	1.02841	SVOC	NA	NA	118255	0.0809493	144797	0.0518064	95947.7	0.0262268
281.139	C15H22O5	O5	CHO	15	22	5	0	0	5	0	0.333333	1.46667	0.0695384	282.147	-0.8	0.2	Low O unsaturated	1.30073	SVOC	299.3	184.543	141409	0.0967983	144776	0.0517989	106709	0.0291684
475.109	C19H24O14	O14	CHO	19	24	14	0	0	8	-6	0.736842	1.26316	-0.287197	476.116	0.210526	0.0833333	High O unsaturated	-9.12473	ELVOC	358.873	189.896	37072.3	0.0253771	92049.4	0.0329341	144774	0.0395731
499.109	C21H24O14	O14	CHO	21	24	14	0	0	10	-4	0.666667	1.14286	0.0037066	500.117	0.190476	0.214286	High O unsaturated	-9.78911	ELVOC	360.403	190.828	NA	NA	66053.4	0.0236331	144769	0.0395719
235.01	C7H8O9	O9	CHO	7	8	9	0	0	4	-5	1.28571	1.14286	-0.0391473	236.017	1.42857	0	Aliphatic	-2.26847	LVOC	311.754	175.92	NA	NA	67810	0.0242616	144739	0.0395636
201.004	C7H6O7	O7	CHO	7	6	7	0	0	5	-2	1	0.857143	-0.0676603	202.011	1.14286	0.428571	High O unsaturated	0.172326	SVOC	293.714	174.407	NA	NA	89068.2	0.0318675	144729	0.039561
253.014	C14H6O5	O5	CHO	14	6	5	0	0	12	7	0.357143	0.428571	0.0221331	254.022	0.285714	0.826087	Condensed aromatic	-0.407727	SVOC	276.881	176.762	76182.8	0.0521494	144442	0.0516796	137248	0.0375161
395.029	C13H16O12S	O12S	CHOS	13	16	12	0	1	6	-6	0.923077	1.23077	0.151888	396.036	0.153846	0	Aliphatic	-7.88386	ELVOC	NA	NA	NA	NA	NA	NA	144228	0.0394239
282.077	C16H13NO4	NO4	CHNO	16	13	4	1	0	11	7	0.25	0.8125	-0.0437823	283.084	-0.625	0.615385	Aromatic	-0.978472	LVOC	NA	NA	81018.9	0.0554598	141072	0.0504737	144184	0.039412
187.076	C12H12O2	O2	CHO	12	12	2	0	0	7	5	0.166667	1	-0.0411596	188.084	-0.666667	0.545455	Aromatic	3.49195	IVOC	230.016	178.109	137782	0.094316	144183	0.0515868	96901.5	0.0264875
175.076	C11H12O2	O2	CHO	11	12	2	0	0	6	4	0.181818	1.09091	-0.00571179	176.084	-0.727273	0.5	Low O unsaturated	4.07799	IVOC	225.861	177.671	114502	0.07838	144109	0.0515605	85069.9	0.0232534
154.999	C6H4O5	O5	CHO	6	4	5	0	0	5	0	0.833333	0.666667	-0.0300003	156.006	1	0.714286	Aromatic	2.66087	IVOC	269.299	172.168	74751.5	0.0511696	144062	0.0515434	129884	0.0355032
202.015	C10H5NO4	NO4	CHNO	10	5	4	1	0	9	5	0.4	0.5	-0.0257407	203.022	-0.2	0.857143	Condensed aromatic	1.12363	SVOC	NA	NA	89913.3	0.0615483	144020	0.0515285	120229	0.0328639
281.009	C15H6O6	O6	CHO	15	6	6	0	0	13	7	0.4	0.4	0.0653004	282.016	0.4	0.833333	Condensed aromatic	-1.7329	LVOC	287.252	177.489	48908.2	0.0334791	117181	0.041926	143999	0.0393615
315.066	C20H12O4	O4	CHO	20	12	4	0	0	15	11	0.2	0.6	-0.0982333	316.074	-0.2	0.722222	Condensed aromatic	-2.18627	LVOC	286.24	181.977	70489.9	0.0482524	102412	0.0366419	143950	0.039348
305.015	C10H10O11	O11	CHO	10	10	11	0	0	6	-5	1.1	1	0.126059	306.022	1.2	0.111111	High O unsaturated	-5.09753	ELVOC	326.96	179.094	NA	NA	67503.2	0.0241518	143590	0.0392497
160.04	C9H7NO2	NO2	CHNO	9	7	2	1	0	7	5	0.222222	0.777778	-0.0146838	161.048	-0.888889	0.714286	Condensed aromatic	2.94449	IVOC	NA	NA	143583	0.0982866	128966	0.0461423	88401	0.0241639
311.004	C12H8O10	O10	CHO	12	8	10	0	0	9	-1	0.833333	0.666667	0.0487131	312.012	1	0.571429	Aromatic	-4.51558	ELVOC	319.155	178.831	NA	NA	72127.1	0.0258062	143553	0.0392393
249.113	C14H18O4	O4	CHO	14	18	4	0	0	6	2	0.285714	1.28571	-0.0447588	250.121	-0.714286	0.333333	Low O unsaturated	2.00686	SVOC	281.403	182.289	103652	0.0709529	143513	0.0513471	108503	0.0296587
389.067	C22H14O7	O7	CHO	22	14	7	0	0	16	9	0.318182	0.636364	0.251114	390.074	0	0.675676	Condensed aromatic	-4.96418	ELVOC	317.43	184.986	NA	NA	66757.5	0.023885	143482	0.0392201
364.104	C17H19NO8	NO8	CHNO	17	19	8	1	0	9	1	0.470588	1.11765	-0.304446	365.111	-0.470588	0.333333	Low O unsaturated	-3.87762	ELVOC	NA	NA	72462.4	0.0496026	107609	0.038501	143376	0.0391911
337.041	C11H14O12	O12	CHO	11	14	12	0	0	5	-7	1.09091	1.27273	-0.264508	338.048	0.909091	0	Aliphatic	-6.04055	ELVOC	335.802	181.619	NA	NA	NA	NA	143265	0.0391608
369.155	C18H26O8	O8	CHO	18	26	8	0	0	6	-2	0.444444	1.44444	-0.160772	370.163	-0.555556	0.142857	Low O unsaturated	-2.14758	LVOC	332.561	188.326	90543.3	0.0619795	143095	0.0511975	118834	0.0324825
359.135	C16H24O9	O9	CHO	16	24	9	0	0	5	-4	0.5625	1.5	-0.0831164	360.142	-0.375	0.0434783	High O unsaturated	-2.53169	LVOC	333.551	187.045	122567	0.0839004	142990	0.0511602	134858	0.0368626
238.983	C9H4O8	O8	CHO	9	4	8	0	0	8	0	0.888889	0.444444	-0.188298	239.991	1.33333	0.8	Condensed aromatic	-1.82414	LVOC	300.71	174.398	NA	NA	80078.4	0.0286511	142920	0.0390664
340.104	C15H19NO8	NO8	CHNO	15	19	8	1	0	7	-1	0.533333	1.26667	-0.267124	341.111	-0.533333	0.2	High O unsaturated	-3.10209	LVOC	NA	NA	60767.3	0.041597	109020	0.039006	142920	0.0390664
439.103	C23H20O9	O9	CHO	23	20	9	0	0	14	5	0.391304	0.869565	0.0322248	440.111	-0.0869565	0.513514	Aromatic	-6.23517	ELVOC	338.279	188.726	NA	NA	57151.7	0.0204482	142843	0.0390454
443.119	C19H24O12	O12	CHO	19	24	12	0	0	8	-4	0.631579	1.26316	-0.211794	444.127	0	0.153846	High O unsaturated	-6.86752	ELVOC	351.601	189.38	53036.2	0.0363048	106517	0.0381103	142547	0.0389644
369.05	C12H18O11S	O11S	CHOS	12	18	11	0	1	4	-7	0.916667	1.5	-0.146457	370.057	-0.166667	0	Aliphatic	-6.11189	ELVOC	NA	NA	NA	NA	NA	NA	142523	0.0389578
239.023	C7H12O7S	O7S	CHOS	7	12	7	0	1	2	-5	1	1.71429	-0.00125511	240.03	-0.571429	0	Aliphatic	-0.795764	LVOC	NA	NA	NA	NA	NA	NA	142458	0.0389401
322.036	C17H9NO6	NO6	CHNO	17	9	6	1	0	14	8	0.352941	0.529412	-0.144083	323.043	-0.117647	0.769231	Condensed aromatic	-2.87125	LVOC	NA	NA	NA	NA	84706.7	0.030307	142393	0.0389224
423.072	C22H16O9	O9	CHO	22	16	9	0	0	15	6	0.409091	0.727273	0.0114638	424.079	0.0909091	0.6	Aromatic	-6.30649	ELVOC	331.722	186.671	NA	NA	66885.2	0.0239307	142230	0.0388778
408.057	C17H15NO11	NO11	CHNO	17	15	11	1	0	11	0	0.647059	0.882353	0.0340638	409.065	0.117647	0.428571	High O unsaturated	-6.1648	ELVOC	NA	NA	NA	NA	65872.7	0.0235684	142078	0.0388361
384.057	C15H15NO11	NO11	CHNO	15	15	11	1	0	9	-2	0.733333	1	-0.272616	385.064	0.133333	0.294118	High O unsaturated	-5.41506	ELVOC	NA	NA	NA	NA	81335.6	0.0291009	141922	0.0387935
280.994	C11H6O9	O9	CHO	11	6	9	0	0	9	0	0.818182	0.545455	-0.223848	282.001	1.09091	0.692308	Condensed aromatic	-3.30119	LVOC	309.926	176.902	NA	NA	85430.1	0.0305658	141625	0.0387125
263.077	C10H16O8	O8	CHO	10	16	8	0	0	3	-5	0.8	1.6	-0.0248976	264.085	0	0	Aliphatic	-0.424141	SVOC	310.685	180.783	86563.3	0.0592551	141608	0.0506656	127555	0.0348665
193.087	C11H14O3	O3	CHO	11	14	3	0	0	5	2	0.272727	1.27273	-0.0479059	194.094	-0.727273	0.368421	Low O unsaturated	3.76284	IVOC	251.932	178.912	116370	0.0796588	141598	0.0506619	79438.3	0.021714
319.025	C18H8O6	O6	CHO	18	8	6	0	0	15	9	0.333333	0.444444	0.153123	320.032	0.222222	0.8	Condensed aromatic	-2.95867	LVOC	294.282	179.85	NA	NA	83411.6	0.0298436	141565	0.038696
261.113	C15H18O4	O4	CHO	15	18	4	0	0	7	3	0.266667	1.2	-0.0578293	262.12	-0.666667	0.384615	Low O unsaturated	1.46345	SVOC	284.136	182.747	100814	0.0690098	141525	0.0506358	122976	0.0336149
433.062	C16H18O14	O14	CHO	16	18	14	0	0	8	-6	0.875	1.125	-0.0554193	434.07	0.625	0.111111	High O unsaturated	-9.10615	ELVOC	351.04	186.334	NA	NA	71322.7	0.0255184	141519	0.0386834
342.098	C18H17NO6	NO6	CHNO	18	17	6	1	0	11	5	0.333333	0.944444	-0.222158	343.106	-0.555556	0.5	Low O unsaturated	-2.96903	LVOC	NA	NA	64635.3	0.0442447	111793	0.0399983	141514	0.038682
385.129	C21H22O7	O7	CHO	21	22	7	0	0	11	4	0.333333	1.04762	-0.428947	386.136	-0.380952	0.428571	Low O unsaturated	-3.33447	LVOC	327.309	187.968	NA	NA	87306.9	0.0312373	141341	0.0386348
403.14	C21H24O8	O8	CHO	21	24	8	0	0	10	2	0.380952	1.14286	0.0395644	404.147	-0.380952	0.352941	Low O unsaturated	-3.85881	ELVOC	335.369	189.03	58824.4	0.040267	97462.9	0.034871	141100	0.038569
166.051	C8H9NO3	NO3	CHNO	8	9	3	1	0	5	2	0.375	1.125	-0.0412524	167.058	-1	0.454545	Low O unsaturated	2.75246	IVOC	NA	NA	128570	0.0880097	141084	0.0504783	84128.9	0.0229962
309.046	C10H14O11	O11	CHO	10	14	11	0	0	4	-7	1.1	1.4	0.0284747	310.054	0.8	0	Aliphatic	-4.54273	ELVOC	329.631	180.792	NA	NA	NA	NA	140937	0.0385243
131.035	C5H8O4	O4	CHO	5	8	4	0	0	2	-2	0.8	1.6	-0.0331972	132.042	0	0	Aliphatic	4.70659	IVOC	246.326	173.41	110998	0.0759812	140730	0.0503515	95973.1	0.0262337
421.041	C18H14O12	O12	CHO	18	14	12	0	0	12	0	0.666667	0.777778	0.221475	422.049	0.555556	0.5	High O unsaturated	-7.89679	ELVOC	339.446	185.099	NA	NA	NA	NA	140704	0.0384606
431.12	C18H24O12	O12	CHO	18	24	12	0	0	7	-5	0.666667	1.33333	0.147523	432.127	0	0.0833333	High O unsaturated	-6.50979	ELVOC	350.571	188.897	59912.6	0.0410119	116212	0.0415791	140695	0.0384582
429.034	C13H18O14S	O14S	CHOS	13	18	14	0	1	5	-9	1.07692	1.38462	-0.0569884	430.042	0.307692	0	Aliphatic	-9.87235	ELVOC	NA	NA	NA	NA	NA	NA	140551	0.0384189
311.044	C10H16O9S	O9S	CHOS	10	16	9	0	1	3	-6	0.9	1.6	0.073623	312.052	-0.4	0	Aliphatic	-3.4726	LVOC	NA	NA	NA	NA	NA	NA	140549	0.0384183
311.15	C16H24O6	O6	CHO	16	24	6	0	0	5	-1	0.375	1.5	0.109754	312.157	-0.75	0.153846	Low O unsaturated	0.273799	SVOC	312.725	186.045	140524	0.0961927	139054	0.0497518	113416	0.0310015
246.062	C9H13NO7	NO7	CHNO	9	13	7	1	0	4	-3	0.777778	1.44444	-0.0530354	247.069	-0.444444	0	Aliphatic	-0.335607	SVOC	NA	NA	76538.5	0.0523928	102139	0.0365441	140513	0.0384084
237.113	C13H18O4	O4	CHO	13	18	4	0	0	5	1	0.307692	1.38462	-0.0267805	238.121	-0.769231	0.272727	Low O unsaturated	2.54081	IVOC	278.467	181.808	124553	0.0852604	140177	0.0501535	78301.4	0.0214033
473.109	C23H22O11	O11	CHO	23	22	11	0	0	13	2	0.478261	0.956522	-0.176386	474.116	0	0.428571	Low O unsaturated	-7.75676	ELVOC	349.283	190.137	NA	NA	71872.1	0.0257149	140076	0.0382889
266.982	C7H8O9S	O9S	CHOS	7	8	9	0	1	4	-5	1.28571	1.14286	-0.160498	267.989	0.571429	0	Aliphatic	-3.74125	ELVOC	NA	NA	NA	NA	NA	NA	139946	0.0382534
257.139	C13H22O5	O5	CHO	13	22	5	0	0	3	-2	0.384615	1.69231	0.00272226	258.147	-0.923077	0.047619	Low O unsaturated	2.30966	SVOC	293.789	183.519	139810	0.0957042	101746	0.0364036	59847.6	0.016359
471.078	C19H20O14	O14	CHO	19	20	14	0	0	10	-4	0.736842	1.05263	-0.152204	472.085	0.421053	0.25	High O unsaturated	-9.67953	ELVOC	354.896	188.522	NA	NA	65809.7	0.0235459	139764	0.0382038
327.124	C19H20O5	O5	CHO	19	20	5	0	0	10	5	0.263158	1.05263	0.0084066	328.131	-0.526316	0.454545	Low O unsaturated	-1.11387	LVOC	306.325	185.621	64238.7	0.0439733	113400	0.0405732	139718	0.038191
323.005	C13H8O10	O10	CHO	13	8	10	0	0	10	0	0.769231	0.615385	0.0939615	324.012	0.923077	0.625	Aromatic	-4.79978	ELVOC	319.135	179.283	NA	NA	59179.9	0.0211738	139684	0.0381819
489.104	C23H22O12	O12	CHO	23	22	12	0	0	13	1	0.521739	0.956522	0.152626	490.111	0.0869565	0.411765	High O unsaturated	-8.72786	ELVOC	352.983	190.437	NA	NA	61589.8	0.0220361	139562	0.0381484
425.145	C20H26O10	O10	CHO	20	26	10	0	0	8	-2	0.5	1.3	-0.213104	426.152	-0.3	0.2	High O unsaturated	-4.92647	ELVOC	346.039	189.9	58080.7	0.0397579	96648.5	0.0345796	139550	0.0381452
273.134	C13H22O6	O6	CHO	13	22	6	0	0	3	-3	0.461538	1.69231	-0.0230656	274.142	-0.769231	0	Aliphatic	1.42381	SVOC	304.077	183.876	139549	0.0955257	104404	0.0373546	63875.6	0.01746
428.083	C17H19NO12	NO12	CHNO	17	19	12	1	0	9	-3	0.705882	1.11765	-0.108507	429.091	5.55e-17	0.2	High O unsaturated	-6.74004	ELVOC	NA	NA	NA	NA	74761.6	0.0267488	139387	0.0381006
410.109	C18H21NO10	NO10	CHNO	18	21	10	1	0	9	-1	0.555556	1.16667	0.190071	411.117	-0.333333	0.25	High O unsaturated	-5.6026	ELVOC	NA	NA	46793.1	0.0320312	86831.1	0.0310671	139345	0.0380893
323.008	C10H12O10S	O10S	CHOS	10	12	10	0	1	5	-5	1	1.2	0.0958181	324.015	0.2	0	Aliphatic	-5.20966	ELVOC	NA	NA	NA	NA	NA	NA	139302	0.0380775
296.02	C15H7NO6	NO6	CHNO	15	7	6	1	0	13	7	0.4	0.466667	-0.0423958	297.027	5.55e-17	0.818182	Condensed aromatic	-2.15365	LVOC	NA	NA	NA	NA	101880	0.0364515	139264	0.0380671
278.046	C16H9NO4	NO4	CHNO	16	9	4	1	0	13	9	0.25	0.5625	0.148357	279.053	-0.375	0.769231	Condensed aromatic	-1.12887	LVOC	NA	NA	69319.4	0.0474511	123773	0.0442846	139217	0.0380543
367.119	C21H20O6	O6	CHO	21	20	6	0	0	12	6	0.285714	0.952381	0.0930217	368.126	-0.380952	0.5	Low O unsaturated	-2.87927	LVOC	318.129	186.829	NA	NA	97547.8	0.0349014	139122	0.0380283
407.077	C22H16O8	O8	CHO	22	16	8	0	0	15	7	0.363636	0.727273	-0.0374622	408.085	0	0.611111	Aromatic	-5.46579	ELVOC	326.587	186.315	NA	NA	76116.6	0.0272336	138902	0.0379682
354.098	C19H17NO6	NO6	CHNO	19	17	6	1	0	12	6	0.315789	0.894737	0.178199	355.106	-0.526316	0.533333	Aromatic	-3.36884	LVOC	NA	NA	NA	NA	105677	0.0378098	138844	0.0379521
429.119	C22H22O9	O9	CHO	22	22	9	0	0	12	3	0.409091	1	0.13283	430.126	-0.181818	0.428571	Low O unsaturated	-5.47429	ELVOC	339.677	189.09	NA	NA	93545.3	0.0334693	138734	0.0379221
475.124	C23H24O11	O11	CHO	23	24	11	0	0	12	1	0.478261	1.04348	-0.183952	476.132	-0.0869565	0.371429	Low O unsaturated	-7.47936	ELVOC	351.54	190.845	NA	NA	65109.1	0.0232952	138512	0.0378616
317.018	C8H14O11S	O11S	CHOS	8	14	11	0	1	2	-9	1.375	1.75	0.0479467	318.026	0.25	0	Aliphatic	-5.5003	ELVOC	NA	NA	NA	NA	NA	NA	138319	0.0378087
345.041	C20H10O6	O6	CHO	20	10	6	0	0	16	10	0.3	0.5	0.32431	346.048	0.1	0.764706	Condensed aromatic	-3.7306	ELVOC	300.682	181.746	NA	NA	87842.7	0.031429	138048	0.0377348
438.104	C19H21NO11	NO11	CHNO	19	21	11	1	0	10	-1	0.578947	1.10526	-0.0314994	439.111	-0.210526	0.28	High O unsaturated	-6.69936	ELVOC	NA	NA	NA	NA	75391.8	0.0269743	138047	0.0377343
258.026	C9H9NO8	NO8	CHNO	9	9	8	1	0	6	-2	0.888889	1	-0.0767366	259.033	0.222222	0.25	High O unsaturated	-1.22528	LVOC	NA	NA	36478	0.0249703	91307.7	0.0326688	138017	0.0377262
414.083	C20H17NO9	NO9	CHNO	20	17	9	1	0	13	4	0.45	0.85	0.0857316	415.09	-0.2	0.517241	Aromatic	-5.82365	ELVOC	NA	NA	NA	NA	71830.7	0.0257001	137964	0.0377119
337.023	C11H14O10S	O10S	CHOS	11	14	10	0	1	5	-5	0.909091	1.27273	-0.0486613	338.031	0	0	Aliphatic	-5.24425	ELVOC	NA	NA	NA	NA	NA	NA	137961	0.037711
348.109	C17H19NO7	NO7	CHNO	17	19	7	1	0	9	2	0.411765	1.11765	-0.346587	349.116	-0.588235	0.36	Low O unsaturated	-3.18152	LVOC	NA	NA	58629.3	0.0401334	102704	0.0367461	137834	0.0376762
294.098	C14H17NO6	NO6	CHNO	14	17	6	1	0	7	1	0.428571	1.21429	0.0394426	295.106	-0.714286	0.3	Low O unsaturated	-1.38387	LVOC	NA	NA	101015	0.069148	137757	0.0492877	137118	0.0374805
226.072	C10H13NO5	NO5	CHNO	10	13	5	1	0	5	0	0.5	1.3	-0.0172511	227.079	-0.8	0.230769	High O unsaturated	0.727035	SVOC	NA	NA	125969	0.0862293	137563	0.0492183	109781	0.0300079
445.062	C17H18O14	O14	CHO	17	18	14	0	0	9	-5	0.823529	1.05882	-0.157169	446.07	0.588235	0.2	High O unsaturated	-9.3678	ELVOC	351.59	186.829	NA	NA	NA	NA	137526	0.0375921
509.094	C22H22O14	O14	CHO	22	22	14	0	0	12	-2	0.636364	1	-0.19407	510.101	0.272727	0.333333	High O unsaturated	-10.423	ELVOC	358.941	190.575	NA	NA	NA	NA	137408	0.0375596
421.099	C16H22O13	O13	CHO	16	22	13	0	0	6	-7	0.8125	1.375	-0.164332	422.106	0.25	0	Aliphatic	-7.322	ELVOC	350.865	187.491	NA	NA	81027.9	0.0289908	137407	0.0375596
156.03	C6H7NO4	NO4	CHNO	6	7	4	1	0	4	0	0.666667	1.16667	-0.0493494	157.037	-0.666667	0.333333	High O unsaturated	2.74709	IVOC	NA	NA	114850	0.0786182	137347	0.0491412	98120.1	0.0268206
471.093	C23H20O11	O11	CHO	23	20	11	0	0	14	3	0.478261	0.869565	-0.238276	472.1	0.0869565	0.485714	Low O unsaturated	-8.03416	ELVOC	346.811	189.381	NA	NA	68754.6	0.0245995	137303	0.037531
183.045	C12H8O2	O2	CHO	12	8	2	0	0	9	7	0.166667	0.666667	-0.041793	184.052	-0.333333	0.727273	Condensed aromatic	2.93715	IVOC	225.199	176.061	137265	0.0939616	126459	0.0452455	96284.2	0.0263188
443.062	C21H16O11	O11	CHO	21	16	11	0	0	14	3	0.52381	0.761905	0.0898294	444.069	0.285714	0.548387	Aromatic	-7.72357	ELVOC	339.895	186.938	NA	NA	55244	0.0197656	137025	0.0374551
397.15	C19H26O9	O9	CHO	19	26	9	0	0	7	-2	0.473684	1.36842	-0.0435603	398.158	-0.421053	0.172414	Low O unsaturated	-3.52916	ELVOC	339.775	189.125	78457	0.0537061	109530	0.0391886	136973	0.0374408
235.04	C15H8O3	O3	CHO	15	8	3	0	0	12	9	0.2	0.533333	-0.0276549	236.047	-0.133333	0.777778	Condensed aromatic	0.680926	SVOC	255.363	177.554	101580	0.0695346	136841	0.0489601	113308	0.030972
316.994	C14H6O9	O9	CHO	14	6	9	0	0	12	3	0.642857	0.428571	0.135965	318.001	0.857143	0.789474	Condensed aromatic	-4.26483	ELVOC	308.986	178.136	NA	NA	61329.6	0.021943	136724	0.0373727
357.134	C20H22O6	O6	CHO	20	22	6	0	0	10	4	0.3	1.1	0.0485812	358.142	-0.5	0.411765	Low O unsaturated	-2.0662	LVOC	318.751	187.17	69796.5	0.0477777	102118	0.0365365	136658	0.0373548
312.015	C15H7NO7	NO7	CHNO	15	7	7	1	0	13	6	0.466667	0.466667	0.0189093	313.022	0.133333	0.809524	Condensed aromatic	-2.8485	LVOC	NA	NA	NA	NA	70635.2	0.0252724	136647	0.0373516
434.073	C19H17NO11	NO11	CHNO	19	17	11	1	0	12	1	0.578947	0.894737	-0.00357083	435.08	5.55e-17	0.44	High O unsaturated	-6.84976	ELVOC	NA	NA	NA	NA	57419.9	0.0205441	136427	0.0372916
442.099	C18H21NO12	NO12	CHNO	18	21	12	1	0	9	-3	0.666667	1.16667	0.10518	443.106	-0.111111	0.181818	High O unsaturated	-7.03987	ELVOC	NA	NA	NA	NA	54230.9	0.0194031	136271	0.0372488
381.025	C19H10O9	O9	CHO	19	10	9	0	0	15	6	0.473684	0.526316	-0.132012	382.032	0.421053	0.724138	Condensed aromatic	-5.74836	ELVOC	318.936	182.52	NA	NA	51284.1	0.0183488	136253	0.0372441
361.035	C20H10O7	O7	CHO	20	10	7	0	0	16	9	0.35	0.5	-0.105945	362.043	0.2	0.757576	Condensed aromatic	-4.48645	ELVOC	307.761	182.147	NA	NA	59365.5	0.0212403	136213	0.0372331
497.13	C22H26O13	O13	CHO	22	26	13	0	0	10	-3	0.590909	1.18182	0.068292	498.137	0	0.225806	High O unsaturated	-8.79329	ELVOC	359.882	191.66	NA	NA	68436.9	0.0244859	136083	0.0371975
431.05	C13H20O14S	O14S	CHOS	13	20	14	0	1	4	-10	1.07692	1.53846	-0.0968565	432.057	0.153846	0	Aliphatic	-9.57095	ELVOC	NA	NA	NA	NA	NA	NA	135614	0.0370694
433.029	C12H18O15S	O15S	CHOS	12	18	15	0	1	4	-11	1.25	1.5	0.104843	434.037	0.5	0	Aliphatic	-10.7534	ELVOC	NA	NA	NA	NA	NA	NA	135558	0.0370541
304.062	C18H11NO4	NO4	CHNO	18	11	4	1	0	14	10	0.222222	0.611111	0.0361769	305.069	-0.444444	0.733333	Condensed aromatic	-1.8644	LVOC	NA	NA	52725.1	0.0360918	89361.5	0.0319725	135398	0.0370104
403.125	C17H24O11	O11	CHO	17	24	11	0	0	6	-5	0.647059	1.41176	0.102698	404.132	-0.117647	0.0434783	High O unsaturated	-5.04702	ELVOC	345.142	188.129	84870.4	0.0580962	132729	0.0474887	135348	0.0369966
406.114	C19H21NO9	NO9	CHNO	19	21	9	1	0	10	1	0.473684	1.10526	-0.17175	407.122	-0.421053	0.333333	Low O unsaturated	-5.28277	ELVOC	NA	NA	NA	NA	68627.9	0.0245542	135171	0.0369483
152.986	C3H6O5S	O5S	CHOS	3	6	5	0	1	1	-4	1.66667	2	-0.047063	153.994	-0.666667	5	Aromatic	1.79036	SVOC	NA	NA	NA	NA	NA	NA	135088	0.0369256
447.057	C20H16O12	O12	CHO	20	16	12	0	0	13	1	0.6	0.8	0.0502173	448.064	0.4	0.5	High O unsaturated	-8.35147	ELVOC	343.285	186.83	NA	NA	54488	0.0194951	135070	0.0369207
426.104	C18H21NO11	NO11	CHNO	18	21	11	1	0	9	-2	0.611111	1.16667	-0.227879	427.111	-0.222222	0.217391	High O unsaturated	-6.31811	ELVOC	NA	NA	NA	NA	75902.5	0.027157	135014	0.0369055
381.05	C13H18O11S	O11S	CHOS	13	18	11	0	1	5	-6	0.846154	1.38462	0.107466	382.057	-0.153846	0	Aliphatic	-6.46366	ELVOC	NA	NA	NA	NA	NA	NA	134942	0.0368856
352.031	C14H11NO10	NO10	CHNO	14	11	10	1	0	10	0	0.714286	0.785714	0.30182	353.038	0.285714	0.5	High O unsaturated	-4.46277	ELVOC	NA	NA	NA	NA	68796.6	0.0246146	134815	0.0368508
300.015	C14H7NO7	NO7	CHNO	14	7	7	1	0	12	5	0.5	0.5	-0.128494	301.022	0.142857	0.789474	Condensed aromatic	-2.4595	LVOC	NA	NA	NA	NA	92289.8	0.0330202	134809	0.0368494
541.12	C23H26O15	O15	CHO	23	26	15	0	0	11	-4	0.652174	1.13043	0.00277203	542.127	0.173913	0.225806	High O unsaturated	-11.3276	ELVOC	366.803	192.62	NA	NA	NA	NA	134730	0.0368277
449.094	C17H22O14	O14	CHO	17	22	14	0	0	7	-7	0.823529	1.29412	-0.0604551	450.101	0.352941	0	Aliphatic	-8.813	ELVOC	355.484	188.25	NA	NA	NA	NA	134678	0.0368134
378.062	C20H13NO7	NO7	CHNO	20	13	7	1	0	15	8	0.35	0.65	-0.452704	379.069	-0.2	0.677419	Condensed aromatic	-4.59555	ELVOC	NA	NA	NA	NA	NA	NA	134648	0.0368052
414.104	C17H21NO11	NO11	CHNO	17	21	11	1	0	8	-3	0.647059	1.23529	-0.0718418	415.111	-0.235294	0.142857	High O unsaturated	-5.9392	ELVOC	NA	NA	NA	NA	67445.3	0.0241311	134533	0.0367739
240.067	C14H11NO3	NO3	CHNO	14	11	3	1	0	10	7	0.214286	0.785714	-0.026451	241.074	-0.714286	0.652174	Aromatic	0.412062	SVOC	NA	NA	112858	0.0772545	134485	0.0481172	119107	0.0325573
411.024	C13H16O13S	O13S	CHOS	13	16	13	0	1	6	-7	1	1.23077	-0.0480507	412.031	0.307692	0	Aliphatic	-9.02076	ELVOC	NA	NA	NA	NA	NA	NA	134328	0.0367179
370.042	C14H13NO11	NO11	CHNO	14	13	11	1	0	9	-2	0.785714	0.928571	-0.159712	371.049	0.285714	0.333333	High O unsaturated	-5.12006	ELVOC	NA	NA	NA	NA	NA	NA	134001	0.0366285
457.062	C18H18O14	O14	CHO	18	18	14	0	0	10	-4	0.777778	1	0.0344592	458.07	0.555556	0.272727	High O unsaturated	-9.65207	ELVOC	352.108	187.304	NA	NA	NA	NA	133995	0.0366269
395.114	C22H20O7	O7	CHO	22	20	7	0	0	13	6	0.318182	0.909091	-0.291182	396.121	-0.272727	0.513514	Aromatic	-4.13198	ELVOC	326.339	187.612	NA	NA	82511.2	0.0295215	133940	0.0366116
362.067	C20H13NO6	NO6	CHNO	20	13	6	1	0	15	9	0.3	0.65	-0.279921	363.074	-0.3	0.6875	Condensed aromatic	-3.92014	ELVOC	NA	NA	NA	NA	66998.9	0.0239714	133838	0.0365838
416.083	C16H19NO12	NO12	CHNO	16	19	12	1	0	8	-4	0.75	1.1875	0.102624	417.091	0	0.111111	High O unsaturated	-6.36777	ELVOC	NA	NA	NA	NA	68497.3	0.0245075	133815	0.0365777
519.114	C24H24O13	O13	CHO	24	24	13	0	0	13	0	0.541667	1	-0.179537	520.122	0.0833333	0.371429	High O unsaturated	-9.86978	ELVOC	359.37	191.839	NA	NA	44710.2	0.0159968	133780	0.0365682
289.087	C19H14O3	O3	CHO	19	14	3	0	0	13	10	0.157895	0.736842	-0.127643	290.094	-0.421053	0.657143	Aromatic	-0.825856	LVOC	274.448	182.163	71559.8	0.0489847	105958	0.0379104	133713	0.0365499
294.077	C17H13NO4	NO4	CHNO	17	13	4	1	0	12	8	0.235294	0.764706	0.0680094	295.084	-0.588235	0.642857	Aromatic	-1.38343	LVOC	NA	NA	71699.5	0.0490804	116087	0.0415345	133655	0.0365338
382.093	C20H17NO7	NO7	CHNO	20	17	7	1	0	13	6	0.35	0.85	0.0327145	383.101	-0.4	0.548387	Aromatic	-4.44515	ELVOC	NA	NA	NA	NA	74764.9	0.0267499	133471	0.0364835
347.025	C12H12O12	O12	CHO	12	12	12	0	0	7	-5	1	1	-0.301707	348.033	1	0.166667	High O unsaturated	-6.49347	ELVOC	334.615	181.339	NA	NA	67998.5	0.024329	133440	0.0364751
441.14	C20H26O11	O11	CHO	20	26	11	0	0	8	-3	0.55	1.3	0.16344	442.148	-0.2	0.172414	High O unsaturated	-5.92238	ELVOC	350.416	190.198	52768.5	0.0361216	93596.9	0.0334878	133310	0.0364397
283.155	C15H24O5	O5	CHO	15	24	5	0	0	4	-1	0.333333	1.6	0.00441454	284.162	-0.933333	0.12	Low O unsaturated	1.57813	SVOC	300.753	185.169	133298	0.0912464	105085	0.037598	61058.2	0.0166899
380.078	C20H15NO7	NO7	CHNO	20	15	7	1	0	14	7	0.35	0.75	0.315593	381.085	-0.3	0.612903	Aromatic	-4.52035	ELVOC	NA	NA	NA	NA	81488.2	0.0291555	133235	0.0364192
226.027	C13H6O4	O4	CHO	13	6	4	0	0	11	7	0.307692	0.461538	-0.0473394	226.027	0.153846	0.818182	Condensed aromatic	0.876408	SVOC	263.517	176.011	76184.7	0.0521506	133202	0.0476581	104918	0.0286789
413.124	C22H22O8	O8	CHO	22	22	8	0	0	12	4	0.363636	1	-0.113525	414.131	-0.272727	0.444444	Low O unsaturated	-4.63359	ELVOC	334.541	188.739	38508.7	0.0263603	73063.3	0.0261411	133163	0.0363995
211.076	C14H12O2	O2	CHO	14	12	2	0	0	9	7	0.142857	0.857143	-0.0554302	212.084	-0.571429	0.615385	Aromatic	2.30573	SVOC	237.376	178.921	123447	0.0845034	132792	0.0475112	123014	0.0336252
318.083	C12H17NO9	NO9	CHNO	12	17	9	1	0	5	-4	0.75	1.41667	0.146345	319.09	-0.333333	0	Aliphatic	-2.76229	LVOC	NA	NA	NA	NA	73580.5	0.0263262	132748	0.0362858
430.078	C20H17NO10	NO10	CHNO	20	17	10	1	0	13	3	0.5	0.85	-0.0177875	431.085	-0.1	0.5	High O unsaturated	-6.5249	ELVOC	NA	NA	NA	NA	52451.2	0.0187664	132737	0.036283
495.078	C21H20O14	O14	CHO	21	20	14	0	0	12	-2	0.666667	0.952381	0.0832192	496.085	0.380952	0.357143	High O unsaturated	-10.3439	ELVOC	356.032	189.411	NA	NA	53826.1	0.0192583	132702	0.0362733
421.062	C15H18O14	O14	CHO	15	18	14	0	0	7	-7	0.933333	1.2	0.105566	422.07	0.666667	0	Aliphatic	-8.86949	ELVOC	350.454	185.818	NA	NA	NA	NA	132569	0.036237
138.02	C6H5NO3	NO3	CHNO	6	5	3	1	0	5	2	0.5	0.833333	-0.0525287	139.027	-0.666667	0.714286	Aromatic	3.38717	IVOC	NA	NA	113717	0.0778424	132556	0.0474271	NA	NA
368.041	C18H11NO8	NO8	CHNO	18	11	8	1	0	14	6	0.444444	0.611111	-0.374822	369.048	-1.11e-16	0.692308	Condensed aromatic	-4.5692	ELVOC	NA	NA	NA	NA	61185.1	0.0218913	132429	0.0361987
447.114	C18H24O13	O13	CHO	18	24	13	0	0	7	-6	0.722222	1.33333	-0.0674324	448.122	0.111111	0.0434783	High O unsaturated	-7.64613	ELVOC	354.452	189.157	NA	NA	102459	0.0366587	132319	0.0361686
457.078	C22H18O11	O11	CHO	22	18	11	0	0	14	3	0.5	0.818182	0.110375	458.085	0.181818	0.515152	Aromatic	-7.87307	ELVOC	343.414	188.186	NA	NA	52395.9	0.0187466	132199	0.0361359
351.015	C18H8O8	O8	CHO	18	8	8	0	0	15	7	0.444444	0.444444	0.0819054	352.022	0.444444	0.785714	Condensed aromatic	-4.64418	ELVOC	308.232	180.599	NA	NA	61389.8	0.0219645	132153	0.0361233
390.047	C17H13NO10	NO10	CHNO	17	13	10	1	0	12	2	0.588235	0.764706	-0.0566599	391.054	0.117647	0.545455	Aromatic	-5.52056	ELVOC	NA	NA	NA	NA	73609.2	0.0263365	132094	0.0361072
341.015	C13H10O11	O11	CHO	13	10	11	0	0	9	-2	0.846154	0.769231	-0.0945706	342.022	0.923077	0.466667	High O unsaturated	-5.73127	ELVOC	327.549	180.642	NA	NA	NA	NA	131866	0.0360447
198.004	C7H5NO6	NO6	CHNO	7	5	6	1	0	6	0	0.857143	0.714286	-0.057827	199.012	0.285714	0.666667	Aromatic	0.834653	SVOC	NA	NA	NA	NA	131845	0.0471724	113544	0.0310368
377.103	C22H18O6	O6	CHO	22	18	6	0	0	14	8	0.272727	0.818182	-0.268494	378.11	-0.272727	0.578947	Aromatic	-3.69865	ELVOC	316.986	186.398	NA	NA	87125.7	0.0311725	131827	0.0360343
403.031	C18H12O11	O11	CHO	18	12	11	0	0	13	2	0.611111	0.666667	0.228643	404.038	0.555556	0.6	Aromatic	-7.07915	ELVOC	332.044	183.849	NA	NA	49011.9	0.0175358	131690	0.0359969
507.114	C23H24O13	O13	CHO	23	24	13	0	0	12	-1	0.565217	1.04348	-0.0845963	508.122	0.0869565	0.333333	High O unsaturated	-9.46401	ELVOC	358.643	191.428	NA	NA	70269.8	0.0251417	131581	0.0359668
398.109	C17H21NO10	NO10	CHNO	17	21	10	1	0	8	-2	0.588235	1.23529	0.197308	399.117	-0.352941	0.181818	High O unsaturated	-5.21976	ELVOC	NA	NA	53334.8	0.0365092	86589	0.0309805	131565	0.0359625
267.103	C17H16O3	O3	CHO	17	16	3	0	0	10	7	0.176471	0.941176	0.00973408	268.11	-0.588235	0.548387	Aromatic	0.628846	SVOC	272.457	182.334	95570.8	0.065421	131511	0.0470531	116678	0.0318933
453.14	C21H26O11	O11	CHO	21	26	11	0	0	9	-2	0.52381	1.2381	-0.141568	454.147	-0.190476	0.225806	High O unsaturated	-6.33657	ELVOC	351.533	190.651	46072.7	0.0315381	79549.3	0.0284618	131281	0.0358849
213.113	C11H18O4	O4	CHO	11	18	4	0	0	3	-1	0.363636	1.63636	-0.0858698	214.12	-0.909091	0.111111	Low O unsaturated	3.57277	IVOC	271.85	180.771	131249	0.0898439	91137	0.0326077	52469.9	0.0143424
505.099	C23H22O13	O13	CHO	23	22	13	0	0	13	0	0.565217	0.956522	-0.0406851	506.106	0.173913	0.393939	High O unsaturated	-9.74141	ELVOC	356.386	190.722	NA	NA	64453.9	0.0230608	131220	0.0358682
305.139	C17H22O5	O5	CHO	17	22	5	0	0	7	2	0.294118	1.29412	-0.300354	306.147	-0.705882	0.310345	Low O unsaturated	0.248399	SVOC	304.12	185.479	80805.7	0.0553138	115627	0.0413699	131131	0.0358441
306.041	C17H9NO5	NO5	CHNO	17	9	5	1	0	14	9	0.294118	0.529412	-0.0552214	307.048	-0.235294	0.777778	Condensed aromatic	-2.19615	LVOC	NA	NA	NA	NA	83907.9	0.0300212	130922	0.0357867
537.125	C24H26O14	O14	CHO	24	26	14	0	0	12	-2	0.583333	1.08333	-0.0330463	538.132	0.0833333	0.294118	High O unsaturated	-10.6234	ELVOC	364.594	192.785	NA	NA	47298	0.0169226	130872	0.035773
287.071	C19H12O3	O3	CHO	19	12	3	0	0	14	11	0.157895	0.631579	-0.0358796	288.079	-0.315789	0.714286	Condensed aromatic	-1.10326	LVOC	271.086	181.159	80770.7	0.0552899	130825	0.0468076	127174	0.0347623
422.109	C19H21NO10	NO10	CHNO	19	21	10	1	0	10	0	0.526316	1.10526	0.0689395	423.117	-0.315789	0.307692	High O unsaturated	-5.98759	ELVOC	NA	NA	NA	NA	75834.3	0.0271326	130790	0.0357507
491.083	C22H20O13	O13	CHO	22	20	13	0	0	13	0	0.590909	0.909091	-0.0796199	492.09	0.272727	0.419355	High O unsaturated	-9.62549	ELVOC	353.329	189.565	NA	NA	42012.2	0.0150314	130695	0.0357247
293.139	C16H22O5	O5	CHO	16	22	5	0	0	6	1	0.3125	1.375	-0.0192741	294.147	-0.75	0.259259	Low O unsaturated	0.779212	SVOC	301.785	185.021	96823.7	0.0662786	130601	0.0467276	107671	0.0294313
334.072	C19H13NO5	NO5	CHNO	19	13	5	1	0	14	9	0.263158	0.684211	0.155056	335.079	-0.421053	0.677419	Condensed aromatic	-2.85132	LVOC	NA	NA	NA	NA	94547.4	0.0338279	130463	0.0356613
221.061	C15H10O2	O2	CHO	15	10	2	0	0	11	9	0.133333	0.666667	-0.0287251	222.068	-0.4	0.714286	Condensed aromatic	1.4298	SVOC	237.626	178.262	130221	0.0891398	125107	0.0447616	106034	0.0289839
381.013	C12H14O12S	O12S	CHOS	12	14	12	0	1	6	-6	1	1.16667	-0.0448803	382.021	0.333333	0	Aliphatic	-7.85086	ELVOC	NA	NA	NA	NA	NA	NA	130144	0.0355742
457.114	C23H22O10	O10	CHO	23	22	10	0	0	13	3	0.434783	0.956522	0.00525033	458.121	-0.0869565	0.444444	Low O unsaturated	-6.83195	ELVOC	345.231	189.82	NA	NA	60766.7	0.0217416	130112	0.0355655
349.108	C21H18O5	O5	CHO	21	18	5	0	0	13	8	0.238095	0.857143	-0.389421	350.115	-0.380952	0.567568	Aromatic	-2.50118	LVOC	307.447	185.601	47848.9	0.032754	86684.4	0.0310146	129764	0.0354703
377.109	C15H22O11	O11	CHO	15	22	11	0	0	5	-6	0.733333	1.46667	-0.326166	378.116	0	0	Aliphatic	-4.64804	ELVOC	341.039	186.454	52731.9	0.0360965	121654	0.0435262	129678	0.0354468
493.135	C23H26O12	O12	CHO	23	26	12	0	0	11	-1	0.521739	1.13043	-0.0865888	494.142	-0.0869565	0.294118	High O unsaturated	-8.17306	ELVOC	357.316	191.81	NA	NA	62363.1	0.0223127	129636	0.0354354
416.099	C20H19NO9	NO9	CHNO	20	19	9	1	0	12	3	0.45	0.95	0.0998561	417.106	-0.3	0.448276	Low O unsaturated	-5.74845	ELVOC	NA	NA	NA	NA	59089.4	0.0211415	129605	0.0354268
184.04	C11H7NO2	NO2	CHNO	11	7	2	1	0	9	7	0.181818	0.636364	-0.0586828	185.048	-0.727273	0.777778	Condensed aromatic	2.12982	SVOC	NA	NA	129551	0.0886811	96948.3	0.0346869	95032.2	0.0259765
441.119	C23H22O9	O9	CHO	23	22	9	0	0	13	4	0.391304	0.956522	-0.0232364	442.126	-0.173913	0.459459	Low O unsaturated	-5.95777	ELVOC	340.751	189.484	40153.9	0.0274865	58866.3	0.0210616	129534	0.0354073
415.055	C13H20O13S	O13S	CHOS	13	20	13	0	1	4	-9	1	1.53846	0.199973	416.062	-1.11e-16	0	Aliphatic	-8.41796	ELVOC	NA	NA	NA	NA	NA	NA	129479	0.0353924
439.067	C22H16O10	O10	CHO	22	16	10	0	0	15	5	0.454545	0.727273	-0.0945186	440.074	0.181818	0.588235	Aromatic	-7.20307	ELVOC	336.316	187.006	NA	NA	58310.4	0.0208628	129410	0.0353735
274.983	C12H4O8	O8	CHO	12	4	8	0	0	11	3	0.666667	0.333333	0.0941875	275.991	1	0.875	Condensed aromatic	-2.72515	LVOC	297.894	175.613	NA	NA	84425.8	0.0302065	129298	0.0353428
437.145	C21H26O10	O10	CHO	21	26	10	0	0	9	-1	0.47619	1.2381	0.0201306	438.153	-0.285714	0.25	Low O unsaturated	-5.3655	ELVOC	347.27	190.347	50963	0.0348857	85472.4	0.030581	129256	0.0353313
448.089	C20H19NO11	NO11	CHNO	20	19	11	1	0	12	1	0.55	0.95	-0.0379389	449.096	-0.1	0.407407	High O unsaturated	-7.15791	ELVOC	NA	NA	NA	NA	61394.3	0.0219661	129190	0.0353135
503.104	C20H24O15	O15	CHO	20	24	15	0	0	9	-6	0.75	1.2	-0.122738	504.111	0.3	0.12	High O unsaturated	-10.6057	ELVOC	362.825	190.616	NA	NA	NA	NA	129158	0.0353046
353.161	C18H26O7	O7	CHO	18	26	7	0	0	6	-1	0.388889	1.44444	0.0346868	354.168	-0.666667	0.172414	Low O unsaturated	-1.26914	LVOC	326.086	187.98	90529.9	0.0619703	129154	0.0462098	121036	0.0330845
487.088	C23H20O12	O12	CHO	23	20	12	0	0	14	2	0.521739	0.869565	0.142377	488.096	0.173913	0.470588	High O unsaturated	-9.00526	ELVOC	350.51	189.682	NA	NA	47045.4	0.0168323	128890	0.0352313
196.976	C4H6O7S	O7S	CHOS	4	6	7	0	1	2	-5	1.75	1.5	-0.0456908	197.983	0.5	5	Aromatic	-0.892609	LVOC	NA	NA	NA	NA	NA	NA	128863	0.0352241
365.018	C12H14O11S	O11S	CHOS	12	14	11	0	1	6	-5	0.916667	1.16667	-0.396281	366.026	0.166667	0	Aliphatic	-6.71469	ELVOC	NA	NA	NA	NA	NA	NA	128857	0.0352224
329.015	C12H10O11	O11	CHO	12	10	11	0	0	8	-3	0.916667	0.833333	0.268073	330.022	1	0.384615	High O unsaturated	-5.48415	ELVOC	327.37	180.153	NA	NA	57228.7	0.0204757	128766	0.0351975
509.13	C23H26O13	O13	CHO	23	26	13	0	0	11	-2	0.565217	1.13043	-0.105278	510.137	0	0.272727	High O unsaturated	-9.18661	ELVOC	360.719	192.093	NA	NA	61608	0.0220426	128449	0.0351108
216.051	C8H11NO6	NO6	CHNO	8	11	6	1	0	4	-2	0.75	1.375	-0.00995134	217.059	-0.5	0	Aliphatic	0.692797	SVOC	NA	NA	96144.5	0.0658137	123600	0.0442225	128375	0.0350907
421.15	C21H26O9	O9	CHO	21	26	9	0	0	9	0	0.428571	1.2381	0.0876172	422.158	-0.380952	0.272727	Low O unsaturated	-4.44535	ELVOC	342.556	190.024	51911.4	0.0355348	80708.4	0.0288765	128282	0.0350652
485.13	C21H26O13	O13	CHO	21	26	13	0	0	9	-4	0.619048	1.2381	-0.0477192	486.137	0	0.172414	High O unsaturated	-8.41353	ELVOC	359.006	191.213	NA	NA	84698.8	0.0303042	128174	0.0350355
389.04	C11H18O13S	O13S	CHOS	11	18	13	0	1	3	-10	1.18182	1.63636	-0.056164	390.047	0.181818	0	Aliphatic	-8.10206	ELVOC	NA	NA	NA	NA	NA	NA	128119	0.0350207
238.051	C14H9NO3	NO3	CHNO	14	9	3	1	0	11	8	0.214286	0.642857	-0.0245746	239.058	-0.571429	0.73913	Condensed aromatic	0.336862	SVOC	NA	NA	93499.2	0.0640029	128100	0.0458327	126035	0.0344511
319.097	C20H16O4	O4	CHO	20	16	4	0	0	13	9	0.2	0.8	-0.331403	320.105	-0.4	0.611111	Aromatic	-1.63147	LVOC	292.833	183.922	NA	NA	95986	0.0343426	127721	0.0349119
174.041	C6H9NO5	NO5	CHNO	6	9	5	1	0	3	-2	0.833333	1.5	-0.0801536	175.048	-0.666667	0	Aliphatic	2.08993	SVOC	NA	NA	66889	0.0457875	99242	0.0355076	127628	0.0348865
387.145	C21H24O7	O7	CHO	21	24	7	0	0	10	3	0.333333	1.14286	0.108487	388.152	-0.47619	0.371429	Low O unsaturated	-3.05707	LVOC	329.395	188.661	NA	NA	83463	0.029862	127490	0.0348487
372.109	C19H19NO7	NO7	CHNO	19	19	7	1	0	11	4	0.368421	1	-0.0589881	373.116	-0.526316	0.448276	Low O unsaturated	-3.97244	ELVOC	NA	NA	53118.4	0.0363611	64811.4	0.0231887	127490	0.0348487
427.055	C14H20O13S	O13S	CHOS	14	20	13	0	1	5	-8	0.928571	1.42857	0.0355926	428.062	5.55e-17	0	Aliphatic	-8.75175	ELVOC	NA	NA	NA	NA	NA	NA	127445	0.0348365
340.031	C13H11NO10	NO10	CHNO	13	11	10	1	0	9	-1	0.769231	0.846154	0.05823	341.038	0.307692	0.428571	High O unsaturated	-4.0914	ELVOC	NA	NA	NA	NA	63654.7	0.0227749	127429	0.0348319
455.098	C23H20O10	O10	CHO	23	20	10	0	0	14	4	0.434783	0.869565	0.0494399	456.106	0	0.5	Low O unsaturated	-7.10935	ELVOC	342.759	189.063	NA	NA	58261.2	0.0208451	127419	0.0348292
336.088	C19H15NO5	NO5	CHNO	19	15	5	1	0	13	8	0.263158	0.789474	-0.421616	337.095	-0.526316	0.612903	Aromatic	-2.77612	LVOC	NA	NA	46213.1	0.0316342	77813.6	0.0278407	127324	0.0348032
141.056	C7H10O3	O3	CHO	7	10	3	0	0	3	0	0.428571	1.42857	-0.0400551	142.063	-0.571429	0.272727	Low O unsaturated	5.26137	IVOC	233.235	175.158	112873	0.0772647	127226	0.0455199	53796.6	0.014705
382.042	C15H13NO11	NO11	CHNO	15	13	11	1	0	10	-1	0.733333	0.866667	0.211757	383.049	0.266667	0.411765	High O unsaturated	-5.49026	ELVOC	NA	NA	NA	NA	51774.1	0.0185241	127169	0.0347609
487.125	C24H24O11	O11	CHO	24	24	11	0	0	13	2	0.458333	1	0.0511163	488.132	-0.0833333	0.405405	Low O unsaturated	-7.92843	ELVOC	352.441	191.247	NA	NA	59145.2	0.0211614	126976	0.0347081
450.104	C20H21NO11	NO11	CHNO	20	21	11	1	0	11	0	0.55	1.05	-0.132303	451.111	-0.2	0.333333	High O unsaturated	-7.08271	ELVOC	NA	NA	NA	NA	60551.9	0.0216647	126768	0.0346513
501.125	C21H26O14	O14	CHO	21	26	14	0	0	9	-5	0.666667	1.2381	-0.124221	502.132	0.0952381	0.142857	High O unsaturated	-9.51171	ELVOC	362.322	191.474	NA	NA	62426.2	0.0223353	126605	0.0346068
434.109	C20H21NO10	NO10	CHNO	20	21	10	1	0	11	1	0.5	1.05	-0.192118	435.116	-0.3	0.357143	High O unsaturated	-6.3745	ELVOC	NA	NA	NA	NA	70873.1	0.0253575	126434	0.03456
438.068	C18H17NO12	NO12	CHNO	18	17	12	1	0	11	-1	0.666667	0.944444	0.145754	439.075	0.111111	0.363636	High O unsaturated	-7.19027	ELVOC	NA	NA	NA	NA	58911.4	0.0210778	126431	0.0345592
364.083	C20H15NO6	NO6	CHNO	20	15	6	1	0	14	8	0.3	0.75	0.257084	365.09	-0.4	0.625	Aromatic	-3.84494	ELVOC	NA	NA	NA	NA	81799.2	0.0292667	126221	0.0345018
328.031	C12H11NO10	NO10	CHNO	12	11	10	1	0	8	-2	0.833333	0.916667	-0.351034	329.038	0.333333	0.333333	High O unsaturated	-3.7239	ELVOC	NA	NA	NA	NA	59546.6	0.021305	126183	0.0344914
329.082	C21H14O4	O4	CHO	21	14	4	0	0	15	11	0.190476	0.666667	-0.0224868	330.089	-0.285714	0.684211	Condensed aromatic	-2.48685	LVOC	291.44	183.328	44118.7	0.0302005	76389.9	0.0273313	126100	0.0344689
400.104	C20H19NO8	NO8	CHNO	20	19	8	1	0	12	4	0.4	0.95	-0.0137464	401.111	-0.4	0.466667	Low O unsaturated	-5.05492	ELVOC	NA	NA	NA	NA	79580.1	0.0284728	125847	0.0343995
192.067	C10H11NO3	NO3	CHNO	10	11	3	1	0	6	3	0.3	1.1	0.00234294	193.074	-1	0.466667	Low O unsaturated	2.02941	SVOC	NA	NA	107514	0.0735968	125785	0.0450044	78269.5	0.0213945
292.994	C12H6O9	O9	CHO	12	6	9	0	0	10	1	0.75	0.5	-0.0484652	294.001	1	0.733333	Condensed aromatic	-3.59359	ELVOC	309.587	177.335	NA	NA	64198.1	0.0229693	125714	0.0343632
331.098	C21H16O4	O4	CHO	21	16	4	0	0	14	10	0.190476	0.761905	-0.0753554	332.105	-0.380952	0.631579	Aromatic	-2.20945	LVOC	294.641	184.27	50426.4	0.0345183	84679.2	0.0302972	125689	0.0343565
323.15	C17H24O6	O6	CHO	17	24	6	0	0	6	0	0.352941	1.41176	-0.429677	324.157	-0.705882	0.214286	Low O unsaturated	-0.227744	SVOC	314.904	186.524	94807.7	0.0648986	119636	0.0428042	125686	0.0343556
454.099	C19H21NO12	NO12	CHNO	19	21	12	1	0	10	-2	0.631579	1.10526	0.121449	455.106	-0.105263	0.25	High O unsaturated	-7.41742	ELVOC	NA	NA	NA	NA	56162	0.0200941	125627	0.0343396
322.021	C13H9NO9	NO9	CHNO	13	9	9	1	0	10	1	0.692308	0.692308	0.234457	323.028	0.307692	0.6	Aromatic	-3.43582	LVOC	NA	NA	NA	NA	78124.1	0.0279518	125463	0.0342947
306.077	C18H13NO4	NO4	CHNO	18	13	4	1	0	13	9	0.222222	0.722222	-0.307275	307.084	-0.555556	0.666667	Aromatic	-1.7892	LVOC	NA	NA	57000.3	0.0390184	91719.3	0.032816	125445	0.0342897
217.108	C10H18O5	O5	CHO	10	18	5	0	0	2	-3	0.5	1.8	-0.050666	218.115	-0.8	0	Aliphatic	3.14893	IVOC	282.093	180.557	125364	0.0858154	90897.9	0.0325221	58006.7	0.0158558
309.028	C10H14O9S	O9S	CHOS	10	14	9	0	1	4	-5	0.9	1.4	-0.312107	310.036	-0.2	0	Aliphatic	-3.774	ELVOC	NA	NA	NA	NA	NA	NA	125293	0.0342483
348.057	C12H15NO11	NO11	CHNO	12	15	11	1	0	6	-5	0.916667	1.25	-0.182154	349.064	0.166667	0	Aliphatic	-4.31588	ELVOC	NA	NA	NA	NA	66607.8	0.0238314	125281	0.0342448
377.161	C20H26O7	O7	CHO	20	26	7	0	0	8	1	0.35	1.3	-0.0497136	378.168	-0.6	0.272727	Low O unsaturated	-2.26725	LVOC	329.659	188.885	NA	NA	84887.7	0.0303718	125247	0.0342356
444.094	C21H19NO10	NO10	CHNO	21	19	10	1	0	13	3	0.47619	0.904762	-0.0801633	445.101	-0.190476	0.466667	Low O unsaturated	-6.83835	ELVOC	NA	NA	NA	NA	55003.5	0.0196796	125144	0.0342073
385.15	C18H26O9	O9	CHO	18	26	9	0	0	6	-3	0.5	1.44444	0.105024	386.158	-0.444444	0.111111	High O unsaturated	-3.08947	LVOC	338.273	188.65	108113	0.0740068	125048	0.0447405	110436	0.0301871
344.099	C14H19NO9	NO9	CHNO	14	19	9	1	0	6	-3	0.642857	1.35714	-0.16318	345.106	-0.428571	0.0588235	High O unsaturated	-3.43614	LVOC	NA	NA	61041	0.0417843	85896.7	0.0307328	125027	0.0341756
395.026	C16H12O12	O12	CHO	16	12	12	0	0	11	-1	0.75	0.75	0.239858	396.033	0.75	0.5	High O unsaturated	-7.51576	ELVOC	335.785	183.28	NA	NA	52051.1	0.0186232	124755	0.0341011
309.113	C19H18O4	O4	CHO	19	18	4	0	0	11	7	0.210526	0.947368	0.175987	310.121	-0.526316	0.529412	Aromatic	-0.780083	LVOC	293.5	184.398	70051.4	0.0479522	110605	0.0395732	124529	0.0340393
271.155	C14H24O5	O5	CHO	14	24	5	0	0	3	-2	0.357143	1.71429	-0.0560565	272.162	-1	0.0434783	Low O unsaturated	2.08887	SVOC	297.967	184.656	124505	0.0852275	82103.9	0.0293758	57934.5	0.0158361
252.088	C12H15NO5	NO5	CHNO	12	15	5	1	0	6	1	0.416667	1.25	-0.0658501	253.095	-0.833333	0.294118	Low O unsaturated	0.0204739	SVOC	NA	NA	108897	0.0745435	124475	0.0445355	105007	0.0287031
317.015	C11H10O11	O11	CHO	11	10	11	0	0	7	-4	1	0.909091	-0.0593032	318.022	1.09091	0.272727	High O unsaturated	-5.27127	ELVOC	327.174	179.639	NA	NA	NA	NA	124427	0.0340114
359.026	C13H12O12	O12	CHO	13	12	12	0	0	8	-4	0.923077	0.923077	-0.0608592	360.033	0.923077	0.285714	High O unsaturated	-6.70486	ELVOC	334.94	181.86	NA	NA	51201	0.0183191	124396	0.0340031
213.007	C5H10O7S	O7S	CHOS	5	10	7	0	1	1	-6	1.4	2	-0.0751147	214.015	-0.4	0	Aliphatic	-0.514647	SVOC	NA	NA	NA	NA	NA	NA	124062	0.0339115
299.129	C18H20O4	O4	CHO	18	20	4	0	0	9	5	0.222222	1.11111	-0.095611	300.136	-0.666667	0.4375	Low O unsaturated	0.0667805	SVOC	293.533	184.772	65646.9	0.0449372	103326	0.0369689	124026	0.0339018
342.026	C16H9NO8	NO8	CHNO	16	9	8	1	0	13	5	0.5	0.5625	-0.105401	343.033	0.125	0.727273	Condensed aromatic	-3.86477	ELVOC	NA	NA	NA	NA	66745.9	0.0238809	124001	0.0338951
425.04	C14H18O13S	O13S	CHOS	14	18	13	0	1	6	-7	0.928571	1.28571	-0.0147045	426.047	0.142857	0	Aliphatic	-9.05315	ELVOC	NA	NA	NA	NA	NA	NA	123966	0.0338854
196.062	C9H11NO4	NO4	CHNO	9	11	4	1	0	5	1	0.444444	1.22222	-0.0290725	197.069	-0.888889	0.333333	Low O unsaturated	1.74248	SVOC	NA	NA	105360	0.0721218	123955	0.0443496	95422.1	0.0260831
405.062	C22H14O8	O8	CHO	22	14	8	0	0	16	8	0.363636	0.636364	-0.072705	406.069	0.0909091	0.666667	Aromatic	-5.74319	ELVOC	323.252	185.368	NA	NA	61120.7	0.0218682	123933	0.0338765
348.051	C19H11NO6	NO6	CHNO	19	11	6	1	0	15	9	0.315789	0.578947	-0.0653639	349.059	-0.210526	0.733333	Condensed aromatic	-3.59444	ELVOC	NA	NA	NA	NA	66690.5	0.023861	123928	0.0338751
389.003	C10H14O14S	O14S	CHOS	10	14	14	0	1	4	-10	1.4	1.4	0.15951	390.01	0.8	0	Aliphatic	-9.62843	ELVOC	NA	NA	NA	NA	NA	NA	123922	0.0338734
252.03	C14H7NO4	NO4	CHNO	14	7	4	1	0	12	8	0.285714	0.5	-0.0105146	253.038	-0.285714	0.818182	Condensed aromatic	-0.397143	SVOC	NA	NA	63311.5	0.0433386	115219	0.041224	123806	0.0338417
523.109	C23H24O14	O14	CHO	23	24	14	0	0	12	-2	0.608696	1.04348	-0.0241823	524.117	0.173913	0.3125	High O unsaturated	-10.5165	ELVOC	361.793	191.699	NA	NA	NA	NA	123512	0.0337613
525.125	C23H26O14	O14	CHO	23	26	14	0	0	11	-3	0.608696	1.13043	-0.195572	526.132	0.0869565	0.25	High O unsaturated	-10.2391	ELVOC	363.87	192.362	NA	NA	50988.4	0.018243	123447	0.0337436
249.999	C10H5NO7	NO7	CHNO	10	5	7	1	0	9	2	0.7	0.5	-0.0342001	251.007	0.4	0.818182	Condensed aromatic	-1.00801	LVOC	NA	NA	NA	NA	109603	0.0392145	123343	0.0337152
521.13	C24H26O13	O13	CHO	24	26	13	0	0	12	-1	0.541667	1.08333	-0.104101	522.137	0	0.314286	High O unsaturated	-9.59238	ELVOC	361.52	192.512	NA	NA	51966	0.0185928	123012	0.0336246
416.062	C19H15NO10	NO10	CHNO	19	15	10	1	0	13	3	0.526316	0.789474	0.0509539	417.07	-5.55e-17	0.538462	Aromatic	-6.21319	ELVOC	NA	NA	NA	NA	65856.2	0.0235625	123011	0.0336245
431.135	C22H24O9	O9	CHO	22	24	9	0	0	11	2	0.409091	1.09091	0.0496365	432.142	-0.272727	0.371429	Low O unsaturated	-5.19689	ELVOC	341.85	189.791	NA	NA	76741.3	0.0274571	122773	0.0335594
272.093	C15H15NO4	NO4	CHNO	15	15	4	1	0	9	5	0.266667	1	-0.0124957	273.1	-0.8	0.5	Low O unsaturated	-0.499258	SVOC	NA	NA	82765.5	0.0566554	122741	0.0439152	105961	0.0289638
252.067	C15H11NO3	NO3	CHNO	15	11	3	1	0	11	8	0.2	0.733333	-0.0126951	253.074	-0.666667	0.68	Condensed aromatic	0.005068	SVOC	NA	NA	89745.3	0.0614332	122721	0.043908	120739	0.0330034
360.094	C14H19NO10	NO10	CHNO	14	19	10	1	0	6	-4	0.714286	1.35714	-0.0806735	361.101	-0.285714	0	Aliphatic	-4.16197	ELVOC	NA	NA	51206.8	0.0350525	79012.6	0.0282697	122641	0.0335232
378.119	C18H21NO8	NO8	CHNO	18	21	8	1	0	9	1	0.444444	1.16667	-0.315509	379.127	-0.555556	0.307692	Low O unsaturated	-4.1932	ELVOC	NA	NA	55888	0.038257	86385.5	0.0309077	122380	0.0334518
235.076	C16H12O2	O2	CHO	16	12	2	0	0	11	9	0.125	0.75	-0.00106348	236.084	-0.5	0.666667	Aromatic	1.10586	SVOC	243.752	179.66	122358	0.0837575	112338	0.0401932	110374	0.0301702
357.156	C17H26O8	O8	CHO	17	26	8	0	0	5	-3	0.470588	1.52941	0.0611778	358.163	-0.588235	0.0769231	Low O unsaturated	-1.69298	LVOC	330.809	187.839	122288	0.0837097	117950	0.042201	108152	0.0295627
397.129	C22H22O7	O7	CHO	22	22	7	0	0	12	5	0.318182	1	0.143152	398.137	-0.363636	0.459459	Low O unsaturated	-3.85458	ELVOC	328.719	188.363	NA	NA	60342.1	0.0215897	122172	0.0333952
473.073	C22H18O12	O12	CHO	22	18	12	0	0	14	2	0.545455	0.818182	-0.0628868	474.08	0.272727	0.5	High O unsaturated	-8.8668	ELVOC	347.207	188.484	NA	NA	52065.7	0.0186285	122161	0.0333921
155.071	C8H12O3	O3	CHO	8	12	3	0	0	3	0	0.375	1.5	-0.0325657	156.079	-0.75	0.230769	Low O unsaturated	5.05556	IVOC	238.333	176.545	122137	0.0836062	117755	0.0421313	48863.9	0.0133567
394.078	C17H17NO10	NO10	CHNO	17	17	10	1	0	10	0	0.588235	1	0.224321	395.085	-0.117647	0.363636	High O unsaturated	-5.37016	ELVOC	NA	NA	53292.6	0.0364804	122122	0.0436937	NA	NA
357.077	C22H14O5	O5	CHO	22	14	5	0	0	16	11	0.227273	0.636364	0.10782	358.084	-0.181818	0.692308	Condensed aromatic	-3.61859	ELVOC	302.759	184.13	NA	NA	68364.3	0.0244599	122053	0.0333625
397.008	C12H14O13S	O13S	CHOS	12	14	13	0	1	6	-7	1.08333	1.16667	0.116244	398.016	0.5	0	Aliphatic	-9.00446	ELVOC	NA	NA	NA	NA	NA	NA	122008	0.0333503
233.061	C16H10O2	O2	CHO	16	10	2	0	0	12	10	0.125	0.625	0.00128722	234.068	-0.375	0.733333	Condensed aromatic	0.828459	SVOC	240.453	178.602	121910	0.0834508	111070	0.0397394	95287	0.0260462
426.068	C17H17NO12	NO12	CHNO	17	17	12	1	0	10	-2	0.705882	1	-0.0314504	427.075	0.117647	0.3	High O unsaturated	-6.81524	ELVOC	NA	NA	NA	NA	75387.1	0.0269726	121775	0.0332864
240.03	C13H7NO4	NO4	CHNO	13	7	4	1	0	11	7	0.307692	0.538462	-0.0166646	241.038	-0.307692	0.8	Condensed aromatic	0.00447977	SVOC	NA	NA	82474.4	0.0564561	121764	0.0435658	116520	0.0318501
304.994	C13H6O9	O9	CHO	13	6	9	0	0	11	2	0.692308	0.461538	-0.0344269	306.001	0.923077	0.764706	Condensed aromatic	-3.91611	ELVOC	309.275	177.745	NA	NA	55164.4	0.0197371	121716	0.0332705
473.13	C20H26O13	O13	CHO	20	26	13	0	0	8	-5	0.65	1.3	-0.0387843	474.137	0	0.111111	High O unsaturated	-8.04856	ELVOC	358.088	190.75	NA	NA	83190.7	0.0297646	121710	0.0332687
465.14	C22H26O11	O11	CHO	22	26	11	0	0	10	-1	0.5	1.18182	-0.15189	466.147	-0.181818	0.272727	High O unsaturated	-6.76347	ELVOC	352.598	191.089	NA	NA	59797	0.0213946	121611	0.0332416
463.109	C18H24O14	O14	CHO	18	24	14	0	0	7	-7	0.777778	1.33333	-0.223813	464.117	0.222222	0	Aliphatic	-8.81987	ELVOC	358.046	189.404	NA	NA	76218.7	0.0272701	121525	0.0332181
437.088	C23H18O9	O9	CHO	23	18	9	0	0	15	6	0.391304	0.782609	-0.116224	438.095	0	0.567568	Aromatic	-6.51257	ELVOC	335.546	187.911	NA	NA	59937.6	0.0214449	121508	0.0332135
402.047	C18H13NO10	NO10	CHNO	18	13	10	1	0	13	3	0.555556	0.722222	-0.116156	403.054	0.111111	0.583333	Aromatic	-5.9034	ELVOC	NA	NA	NA	NA	46476.1	0.0166286	121494	0.0332096
452.083	C19H19NO12	NO12	CHNO	19	19	12	1	0	11	-1	0.631579	1	0.109382	453.091	-5.55e-17	0.333333	High O unsaturated	-7.49262	ELVOC	NA	NA	NA	NA	47650.4	0.0170487	121473	0.033204
463.073	C17H20O15	O15	CHO	17	20	15	0	0	8	-7	0.882353	1.17647	-0.0828163	464.08	0.588235	0.0526316	High O unsaturated	-10.3248	ELVOC	357.076	187.797	NA	NA	NA	NA	121407	0.0331859
313.166	C16H26O6	O6	CHO	16	26	6	0	0	4	-2	0.375	1.625	0.0209154	314.173	-0.875	0.0769231	Low O unsaturated	0.551199	SVOC	314.173	186.645	121370	0.0830812	106613	0.0381447	72820.3	0.019905
365.161	C19H26O7	O7	CHO	19	26	7	0	0	7	0	0.368421	1.36842	0.225928	366.168	-0.631579	0.225806	Low O unsaturated	-1.7634	LVOC	327.919	188.441	72126.6	0.0493727	102771	0.0367703	121274	0.0331497
250.051	C15H9NO3	NO3	CHNO	15	9	3	1	0	12	9	0.2	0.6	-0.0849827	251.058	-0.533333	0.76	Condensed aromatic	-0.070132	SVOC	NA	NA	74051.3	0.0506903	108946	0.0389795	121248	0.0331426
316.031	C11H11NO10	NO10	CHNO	11	11	10	1	0	7	-3	0.909091	1	-0.3381	317.038	0.363636	0.2	High O unsaturated	-3.36083	LVOC	NA	NA	NA	NA	59259.3	0.0212022	121211	0.0331325
411.06	C14H20O12S	O12S	CHOS	14	20	12	0	1	5	-7	0.857143	1.42857	-0.0183671	412.068	-0.142857	0	Aliphatic	-7.63088	ELVOC	NA	NA	NA	NA	NA	NA	121211	0.0331322
517.135	C25H26O12	O12	CHO	25	26	12	0	0	13	1	0.48	1.04	-0.109062	518.142	-0.08	0.368421	Low O unsaturated	-9.0385	ELVOC	359.048	192.626	NA	NA	NA	NA	121209	0.0331319
275.114	C12H20O7	O7	CHO	12	20	7	0	0	3	-4	0.583333	1.66667	0.0279884	276.121	-0.5	0	Aliphatic	0.577863	SVOC	309.217	183.014	121039	0.0828546	115579	0.0413527	71866.2	0.0196442
279.054	C10H16O7S	O7S	CHOS	10	16	7	0	1	3	-4	0.7	1.6	-0.346886	280.062	-0.8	0	Aliphatic	-1.28163	LVOC	NA	NA	NA	NA	NA	NA	121033	0.0330836
425.051	C21H14O10	O10	CHO	21	14	10	0	0	15	5	0.47619	0.666667	0.0524642	426.059	0.285714	0.625	Aromatic	-7.0299	ELVOC	332.43	185.699	NA	NA	49295.8	0.0176374	120858	0.0330359
284.093	C16H15NO4	NO4	CHNO	16	15	4	1	0	10	6	0.25	0.9375	-0.0269278	285.1	-0.75	0.538462	Aromatic	-0.903272	LVOC	NA	NA	68577.7	0.0469434	120853	0.0432396	95969.7	0.0262328
366.119	C17H21NO8	NO8	CHNO	17	21	8	1	0	8	0	0.470588	1.23529	-0.236125	367.127	-0.588235	0.25	Low O unsaturated	-3.80242	ELVOC	NA	NA	59354.9	0.0406302	69142.8	0.0247384	120849	0.0330333
364.046	C19H11NO7	NO7	CHNO	19	11	7	1	0	15	8	0.368421	0.578947	-0.257248	365.053	-0.105263	0.724138	Condensed aromatic	-4.27324	ELVOC	NA	NA	NA	NA	64701.5	0.0231494	120812	0.0330234
457.135	C20H26O12	O12	CHO	20	26	12	0	0	8	-4	0.6	1.3	-0.113861	458.142	-0.1	0.142857	High O unsaturated	-6.96447	ELVOC	354.412	190.481	50126.2	0.0343129	83465.9	0.0298631	120810	0.0330229
449.145	C22H26O10	O10	CHO	22	26	10	0	0	10	0	0.454545	1.18182	-0.0267174	450.153	-0.272727	0.294118	Low O unsaturated	-5.81607	ELVOC	348.443	190.779	NA	NA	81771.8	0.0292569	120609	0.0329678
219.103	C13H16O3	O3	CHO	13	16	3	0	0	6	3	0.230769	1.23077	-0.0755354	220.11	-0.769231	0.391304	Low O unsaturated	2.93073	IVOC	260.632	180.65	96897	0.0663288	120426	0.0430869	78172.7	0.0213681
382.114	C17H21NO9	NO9	CHNO	17	21	9	1	0	8	-1	0.529412	1.23529	-0.14459	383.122	-0.470588	0.217391	High O unsaturated	-4.50722	ELVOC	NA	NA	52049.6	0.0356295	90040.5	0.0322154	120345	0.0328956
521.094	C23H22O14	O14	CHO	23	22	14	0	0	13	-1	0.608696	0.956522	-0.202939	522.101	0.26087	0.375	High O unsaturated	-10.7939	ELVOC	359.537	190.994	NA	NA	NA	NA	120326	0.0328905
527.104	C22H24O15	O15	CHO	22	24	15	0	0	11	-4	0.681818	1.09091	0.0823367	528.112	0.272727	0.241379	High O unsaturated	-11.2562	ELVOC	364.122	191.525	NA	NA	NA	NA	120298	0.0328828
421.093	C23H18O8	O8	CHO	23	18	8	0	0	15	7	0.347826	0.782609	-0.183689	422.1	-0.0869565	0.578947	Aromatic	-5.69394	ELVOC	330.539	187.551	NA	NA	58322.1	0.0208669	120286	0.0328796
359.092	C22H16O5	O5	CHO	22	16	5	0	0	15	10	0.227273	0.727273	-0.174468	360.1	-0.272727	0.641026	Aromatic	-3.34119	LVOC	306.095	185.083	NA	NA	76715	0.0274477	120281	0.0328782
430.099	C17H21NO12	NO12	CHNO	17	21	12	1	0	8	-4	0.705882	1.23529	0.0759127	431.106	-0.117647	0.1	High O unsaturated	-6.66484	ELVOC	NA	NA	NA	NA	57340.9	0.0205159	120206	0.0328576
379.088	C14H20O12	O12	CHO	14	20	12	0	0	5	-7	0.857143	1.42857	-0.281861	380.095	0.285714	0	Aliphatic	-5.83837	ELVOC	343.011	185.507	NA	NA	83223.8	0.0297764	120050	0.032815
302.088	C12H17NO8	NO8	CHNO	12	17	8	1	0	5	-3	0.666667	1.41667	0.176108	303.095	-0.5	0	Aliphatic	-2.03359	LVOC	NA	NA	60423.4	0.0413615	95019.4	0.0339968	120044	0.0328133
339.124	C20H20O5	O5	CHO	20	20	5	0	0	11	6	0.25	1	-0.360488	340.131	-0.5	0.485714	Low O unsaturated	-1.66607	LVOC	308.194	186.017	NA	NA	94883.4	0.0339481	120031	0.0328097
290.103	C15H17NO5	NO5	CHNO	15	17	5	1	0	8	3	0.333333	1.13333	0.0310234	291.111	-0.8	0.391304	Low O unsaturated	-1.09423	LVOC	NA	NA	71166.4	0.0487155	120026	0.0429437	106019	0.0289798
315.039	C9H16O10S	O10S	CHOS	9	16	10	0	1	2	-8	1.11111	1.77778	-0.231082	316.046	-0.222222	0	Aliphatic	-4.2918	ELVOC	NA	NA	NA	NA	NA	NA	119822	0.0327527
251.129	C14H20O4	O4	CHO	14	20	4	0	0	5	1	0.285714	1.42857	0.013738	252.136	-0.857143	0.25	Low O unsaturated	2.28426	SVOC	283.005	182.992	96871.5	0.0663113	119765	0.0428503	73244.3	0.0200209
515.104	C21H24O15	O15	CHO	21	24	15	0	0	10	-5	0.714286	1.14286	0.0446512	516.111	0.285714	0.185185	High O unsaturated	-10.9227	ELVOC	363.489	191.078	NA	NA	54615.7	0.0195408	119757	0.0327349
291.03	C17H8O5	O5	CHO	17	8	5	0	0	14	9	0.294118	0.470588	0.0781707	292.037	0.117647	0.793103	Condensed aromatic	-1.6934	LVOC	284.489	179.11	55282.6	0.0378425	108495	0.0388181	119701	0.0327198
386.109	C16H21NO10	NO10	CHNO	16	21	10	1	0	7	-3	0.625	1.3125	-0.0705759	387.116	-0.375	0.1	High O unsaturated	-4.83931	ELVOC	NA	NA	NA	NA	74710.7	0.0267306	119525	0.0326716
248.093	C13H15NO4	NO4	CHNO	13	15	4	1	0	7	3	0.307692	1.15385	0.0336568	249.1	-0.923077	0.4	Low O unsaturated	0.30528	SVOC	NA	NA	79908.7	0.0546998	119490	0.042752	75249.5	0.020569
377.019	C13H14O11S	O11S	CHOS	13	14	11	0	1	7	-4	0.846154	1.07692	0.250518	378.026	0.153846	0.0769231	High O unsaturated	-7.06646	ELVOC	NA	NA	NA	NA	NA	NA	119469	0.0326562
280.025	C15H7NO5	NO5	CHNO	15	7	5	1	0	13	8	0.333333	0.466667	0.0246406	281.032	-0.133333	0.826087	Condensed aromatic	-1.47023	LVOC	NA	NA	53599.1	0.0366902	98456.2	0.0352264	119408	0.0326396
383.026	C15H12O12	O12	CHO	15	12	12	0	0	10	-2	0.8	0.8	0.408067	384.033	0.8	0.444444	High O unsaturated	-7.21927	ELVOC	335.522	182.828	NA	NA	46036.9	0.0164714	119198	0.0325822
503.119	C24H24O12	O12	CHO	24	24	12	0	0	13	1	0.5	1	-0.0370687	504.127	0	0.388889	High O unsaturated	-8.87787	ELVOC	356.05	191.55	NA	NA	54242.5	0.0194073	119186	0.0325788
262.983	C11H4O8	O8	CHO	11	4	8	0	0	10	2	0.727273	0.363636	0.0190126	263.991	1.09091	0.857143	Condensed aromatic	-2.39077	LVOC	298.746	175.231	NA	NA	83356.5	0.0298239	119149	0.0325688
231.103	C14H16O3	O3	CHO	14	16	3	0	0	7	4	0.214286	1.14286	-0.0536558	232.11	-0.714286	0.44	Low O unsaturated	2.36378	SVOC	263.898	181.1	104213	0.0713365	119096	0.0426109	88435.1	0.0241732
324.109	C15H19NO7	NO7	CHNO	15	19	7	1	0	7	0	0.466667	1.26667	-0.305916	325.116	-0.666667	0.238095	Low O unsaturated	-2.3973	LVOC	NA	NA	66757.6	0.0456975	109340	0.0391205	118803	0.0324742
429.046	C20H14O11	O11	CHO	20	14	11	0	0	14	3	0.55	0.7	-0.113741	430.054	0.4	0.586207	Aromatic	-7.58678	ELVOC	336.229	185.628	NA	NA	55350.3	0.0198036	118740	0.0324568
432.094	C20H19NO10	NO10	CHNO	20	19	10	1	0	12	2	0.5	0.95	0.0742895	433.101	-0.2	0.428571	High O unsaturated	-6.4497	ELVOC	NA	NA	NA	NA	70441.9	0.0252032	118651	0.0324327
501.089	C20H22O15	O15	CHO	20	22	15	0	0	10	-5	0.75	1.1	-0.138099	502.096	0.4	0.2	High O unsaturated	-10.8831	ELVOC	360.831	189.942	NA	NA	NA	NA	118615	0.0324229
459.13	C23H24O10	O10	CHO	23	24	10	0	0	12	2	0.434783	1.04348	-0.220526	460.137	-0.173913	0.388889	Low O unsaturated	-6.55455	ELVOC	347.488	190.53	40983.7	0.0280545	62978.4	0.0225329	118574	0.0324115
370.114	C16H21NO9	NO9	CHNO	16	21	9	1	0	7	-2	0.5625	1.3125	-0.164544	371.122	-0.5	0.142857	High O unsaturated	-4.12258	ELVOC	NA	NA	51140.9	0.0350074	84773.5	0.0303309	118539	0.0324019
353.055	C12H18O10S	O10S	CHOS	12	18	10	0	1	4	-6	0.833333	1.5	0.231126	354.062	-0.333333	0	Aliphatic	-4.99552	ELVOC	NA	NA	NA	NA	NA	NA	118234	0.0323187
357.05	C11H18O11S	O11S	CHOS	11	18	11	0	1	3	-8	1	1.63636	-0.132755	358.057	-0.181818	0	Aliphatic	-5.77676	ELVOC	NA	NA	NA	NA	NA	NA	118207	0.0323111
485.109	C24H22O11	O11	CHO	24	22	11	0	0	14	3	0.458333	0.916667	0.00484427	486.116	0	0.459459	Low O unsaturated	-8.20583	ELVOC	350.104	190.529	NA	NA	50419.5	0.0180395	118076	0.0322754
359.15	C20H24O6	O6	CHO	20	24	6	0	0	9	3	0.3	1.2	-0.276625	360.157	-0.6	0.352941	Low O unsaturated	-1.7888	LVOC	320.746	187.854	NA	NA	81799	0.0292667	117666	0.0321634
418.114	C20H21NO9	NO9	CHNO	20	21	9	1	0	11	2	0.45	1.05	0.132978	419.122	-0.4	0.37931	Low O unsaturated	-5.67325	ELVOC	NA	NA	NA	NA	75698.7	0.027084	117666	0.0321634
278.103	C14H17NO5	NO5	CHNO	14	17	5	1	0	7	2	0.357143	1.21429	0.0382951	279.111	-0.857143	0.333333	Low O unsaturated	-0.695779	LVOC	NA	NA	86911	0.0594931	117639	0.0420898	85877.6	0.0234742
379.034	C13H16O11S	O11S	CHOS	13	16	11	0	1	6	-5	0.846154	1.23077	0.113842	380.041	-1.11e-16	0	Aliphatic	-6.76506	ELVOC	NA	NA	NA	NA	NA	NA	117631	0.0321538
313.144	C19H22O4	O4	CHO	19	22	4	0	0	9	5	0.210526	1.15789	-0.32014	314.152	-0.736842	0.411765	Low O unsaturated	-0.225283	SVOC	297.877	185.896	NA	NA	75164.7	0.026893	117599	0.032145
409.15	C20H26O9	O9	CHO	20	26	9	0	0	8	-1	0.45	1.3	0.211903	410.158	-0.4	0.225806	Low O unsaturated	-3.98154	ELVOC	341.201	189.583	47103.6	0.0322438	88347.9	0.0316098	117559	0.0321341
477.067	C21H18O13	O13	CHO	21	18	13	0	0	13	0	0.619048	0.857143	-0.0388834	478.075	0.380952	0.448276	High O unsaturated	-9.52313	ELVOC	350.191	188.361	NA	NA	42088.9	0.0150589	117512	0.0321213
304.01	C13H7NO8	NO8	CHNO	13	7	8	1	0	11	3	0.615385	0.538462	-0.0845367	305.017	0.307692	0.75	Condensed aromatic	-2.78771	LVOC	NA	NA	NA	NA	67807.2	0.0242606	117365	0.0320812
513.125	C22H26O14	O14	CHO	22	26	14	0	0	10	-4	0.636364	1.18182	-0.215347	514.132	0.0909091	0.2	High O unsaturated	-9.86821	ELVOC	363.113	191.925	NA	NA	NA	NA	117358	0.0320793
301.087	C20H14O3	O3	CHO	20	14	3	0	0	14	11	0.15	0.7	0.17935	302.094	-0.4	0.675676	Condensed aromatic	-1.41909	LVOC	276.561	182.499	56314.2	0.0385487	89660.6	0.0320795	117270	0.0320552
331.14	C15H24O8	O8	CHO	15	24	8	0	0	4	-4	0.533333	1.6	-0.0795736	332.147	-0.533333	0	Aliphatic	-1.10531	LVOC	325.634	186.217	112043	0.076697	117126	0.0419064	91086.3	0.024898
391.019	C10H16O14S	O14S	CHOS	10	16	14	0	1	3	-11	1.4	1.6	0.173393	392.026	0.6	0	Aliphatic	-9.32703	ELVOC	NA	NA	NA	NA	NA	NA	117119	0.0320139
489.089	C19H22O15	O15	CHO	19	22	15	0	0	9	-6	0.789474	1.15789	0.0849539	490.096	0.421053	0.130435	High O unsaturated	-10.5842	ELVOC	360.23	189.473	NA	NA	NA	NA	117094	0.0320069
433.15	C22H26O9	O9	CHO	22	26	9	0	0	10	1	0.409091	1.18182	-0.0147755	434.158	-0.363636	0.314286	Low O unsaturated	-4.91949	ELVOC	343.849	190.451	NA	NA	77791.4	0.0278328	116987	0.0319777
469.078	C23H18O11	O11	CHO	23	18	11	0	0	15	4	0.478261	0.782609	0.155625	470.085	0.173913	0.542857	Aromatic	-8.31156	ELVOC	344.078	188.57	NA	NA	42199.2	0.0150983	116754	0.0319142
409.045	C14H18O12S	O12S	CHOS	14	18	12	0	1	6	-6	0.857143	1.28571	-0.0712636	410.052	-1.67e-16	0	Aliphatic	-7.93228	ELVOC	NA	NA	NA	NA	NA	NA	116731	0.0319078
351.003	C11H12O11S	O11S	CHOS	11	12	11	0	1	6	-5	1	1.09091	0.252847	352.01	0.363636	0	Aliphatic	-6.68096	ELVOC	NA	NA	NA	NA	NA	NA	116721	0.0319052
453.083	C23H18O10	O10	CHO	23	18	10	0	0	15	5	0.434783	0.782609	0.153283	454.09	0.0869565	0.555556	Aromatic	-7.38675	ELVOC	340.026	188.25	NA	NA	46215.5	0.0165353	116528	0.0318522
426.083	C21H17NO9	NO9	CHNO	21	17	9	1	0	14	5	0.428571	0.809524	-0.0918835	427.09	-0.190476	0.548387	Aromatic	-6.21569	ELVOC	NA	NA	NA	NA	51846.8	0.0185501	116455	0.0318324
513.089	C21H22O15	O15	CHO	21	22	15	0	0	11	-4	0.714286	1.04762	0.0745485	514.096	0.380952	0.259259	High O unsaturated	-11.2001	ELVOC	361.403	190.394	NA	NA	NA	NA	116454	0.0318321
348.088	C20H15NO5	NO5	CHNO	20	15	5	1	0	14	9	0.25	0.75	0.114626	349.095	-0.5	0.636364	Aromatic	-3.18023	LVOC	NA	NA	42934.1	0.0293896	71453.1	0.025565	116450	0.031831
202.036	C7H9NO6	NO6	CHNO	7	9	6	1	0	4	-2	0.857143	1.28571	-0.0942903	203.043	-0.285714	0	Aliphatic	0.985053	SVOC	NA	NA	70964	0.0485769	98835.9	0.0353623	116429	0.0318251
481.135	C22H26O12	O12	CHO	22	26	12	0	0	10	-2	0.545455	1.18182	-0.204516	482.142	-0.0909091	0.25	High O unsaturated	-7.7572	ELVOC	356.392	191.382	NA	NA	76817	0.0274842	116300	0.03179
371.026	C14H12O12	O12	CHO	14	12	12	0	0	9	-3	0.857143	0.857143	-0.0212923	372.033	0.857143	0.375	High O unsaturated	-6.94797	ELVOC	335.242	182.355	NA	NA	53654.7	0.019197	116162	0.0317521
379.119	C22H20O6	O6	CHO	22	20	6	0	0	13	7	0.272727	0.909091	0.368618	380.126	-0.363636	0.526316	Aromatic	-3.42125	LVOC	319.618	187.206	NA	NA	81759.7	0.0292526	116130	0.0317436
469.062	C19H18O14	O14	CHO	19	18	14	0	0	11	-3	0.736842	0.947368	0.0913525	470.07	0.526316	0.333333	High O unsaturated	-9.95693	ELVOC	352.599	187.761	NA	NA	50130.1	0.0179359	115961	0.0316974
170.046	C7H9NO4	NO4	CHNO	7	9	4	1	0	4	0	0.571429	1.28571	-0.0341084	171.053	-0.857143	0.25	High O unsaturated	2.44254	SVOC	NA	NA	101978	0.0698071	115961	0.0414896	84037.3	0.0229711
264.067	C16H11NO3	NO3	CHNO	16	11	3	1	0	12	9	0.1875	0.6875	-0.127241	265.074	-0.625	0.703704	Condensed aromatic	-0.402653	SVOC	NA	NA	76349.6	0.0522635	99731.4	0.0356827	115882	0.0316758
393.156	C20H26O8	O8	CHO	20	26	8	0	0	8	0	0.4	1.3	0.096781	394.163	-0.5	0.25	Low O unsaturated	-3.09305	LVOC	335.791	189.246	61870	0.0423518	92257.7	0.0330087	115840	0.0316643
358.042	C13H13NO11	NO11	CHNO	13	13	11	1	0	8	-3	0.846154	1	-0.0526475	359.049	0.307692	0.230769	High O unsaturated	-4.75352	ELVOC	NA	NA	NA	NA	56766.1	0.0203102	115788	0.0316501
389.036	C14H14O13	O13	CHO	14	14	13	0	0	8	-5	0.928571	1	-0.30537	390.043	0.857143	0.2	High O unsaturated	-7.92579	ELVOC	341.958	183.49	NA	NA	NA	NA	115711	0.0316291
265.002	C8H10O8S	O8S	CHOS	8	10	8	0	1	4	-4	1	1.25	0.0945275	266.01	0	0	Aliphatic	-2.56846	LVOC	NA	NA	NA	NA	NA	NA	115673	0.0316185
535.109	C24H24O14	O14	CHO	24	24	14	0	0	13	-1	0.583333	1	-0.0575583	536.117	0.166667	0.352941	High O unsaturated	-10.9008	ELVOC	362.444	192.113	NA	NA	50817.8	0.018182	115606	0.0316002
401.145	C18H26O10	O10	CHO	18	26	10	0	0	6	-4	0.555556	1.44444	-0.160166	402.153	-0.333333	0.0769231	High O unsaturated	-4.08802	ELVOC	343.382	188.955	99340.5	0.0680015	115509	0.0413276	112791	0.0308308
213.092	C14H14O2	O2	CHO	14	14	2	0	0	8	6	0.142857	1	-0.0403581	214.099	-0.714286	0.538462	Aromatic	2.58313	IVOC	239.721	179.832	83665.9	0.0572717	115354	0.0412721	83976.2	0.0229544
469.114	C24H22O10	O10	CHO	24	22	10	0	0	14	4	0.416667	0.916667	-0.172666	470.121	-0.0833333	0.473684	Low O unsaturated	-7.30259	ELVOC	346.151	190.207	NA	NA	49063.1	0.0175542	115289	0.0315136
146.025	C8H5NO2	NO2	CHNO	8	5	2	1	0	7	5	0.25	0.625	-0.0582093	147.032	-0.75	0.833333	Condensed aromatic	3.27465	IVOC	NA	NA	115062	0.078763	65159.6	0.0233133	57719	0.0157772
275.129	C16H20O4	O4	CHO	16	20	4	0	0	7	3	0.25	1.25	0.053793	276.136	-0.75	0.357143	Low O unsaturated	1.18941	SVOC	288.599	183.92	82706	0.0566146	114948	0.0411269	97990.9	0.0267853
328.104	C14H19NO8	NO8	CHNO	14	19	8	1	0	6	-2	0.571429	1.35714	-0.224929	329.111	-0.571429	0.111111	High O unsaturated	-2.71789	LVOC	NA	NA	65457.1	0.0448073	91774.8	0.0328359	114902	0.0314078
401.036	C15H14O13	O13	CHO	15	14	13	0	0	9	-4	0.866667	0.933333	-0.0206964	402.043	0.8	0.294118	High O unsaturated	-8.16545	ELVOC	342.334	183.989	NA	NA	NA	NA	114885	0.0314032
403.082	C23H16O7	O7	CHO	23	16	7	0	0	16	9	0.304348	0.695652	-0.178872	404.09	-0.0869565	0.641026	Aromatic	-5.21379	ELVOC	321.806	186.282	NA	NA	50681.4	0.0181332	114874	0.0314001
412.067	C20H15NO9	NO9	CHNO	20	15	9	1	0	14	5	0.45	0.75	0.117092	413.075	-0.1	0.586207	Aromatic	-5.89885	ELVOC	NA	NA	NA	NA	NA	NA	114838	0.0313903
501.104	C24H22O12	O12	CHO	24	22	12	0	0	14	2	0.5	0.916667	-0.0161643	502.111	0.0833333	0.444444	High O unsaturated	-9.15527	ELVOC	353.713	190.834	NA	NA	50181.2	0.0179542	114837	0.03139
287.15	C14H24O6	O6	CHO	14	24	6	0	0	3	-3	0.428571	1.71429	-0.0423124	288.157	-0.857143	0	Aliphatic	1.24021	SVOC	307.925	185.021	114782	0.0785715	76386.1	0.02733	62345.3	0.0170418
331.155	C19H24O5	O5	CHO	19	24	5	0	0	8	3	0.263158	1.26316	-0.107352	332.162	-0.736842	0.333333	Low O unsaturated	-0.559074	LVOC	310.301	187.016	58252.4	0.0398755	72864.1	0.0260699	114756	0.031368
338.103	C19H17NO5	NO5	CHNO	19	17	5	1	0	12	7	0.263158	0.894737	0.18589	339.111	-0.631579	0.548387	Aromatic	-2.70092	LVOC	NA	NA	NA	NA	71836.2	0.0257021	114735	0.0313621
469.135	C21H26O12	O12	CHO	21	26	12	0	0	9	-3	0.571429	1.2381	-0.282541	470.142	-0.0952381	0.2	High O unsaturated	-7.35395	ELVOC	355.426	190.939	47564.1	0.032559	77097.4	0.0275845	114708	0.0313549
256.083	C11H15NO6	NO6	CHNO	11	15	6	1	0	5	-1	0.545455	1.36364	-0.0536936	257.09	-0.727273	0.142857	High O unsaturated	-0.291956	SVOC	NA	NA	90820.6	0.0621693	114664	0.0410254	104776	0.0286399
523.146	C24H28O13	O13	CHO	24	28	13	0	0	11	-2	0.541667	1.16667	-0.119756	524.153	-0.0833333	0.257143	High O unsaturated	-9.31498	ELVOC	363.51	193.148	NA	NA	47753.2	0.0170855	114529	0.0313059
279.103	C18H16O3	O3	CHO	18	16	3	0	0	11	8	0.166667	0.888889	-0.252058	280.11	-0.555556	0.575758	Aromatic	0.0418689	SVOC	274.977	182.713	75079.4	0.051394	107368	0.038415	114511	0.0313009
423.078	C15H20O14	O14	CHO	15	20	14	0	0	6	-8	0.933333	1.33333	0.0652362	424.085	0.533333	0	Aliphatic	-8.59209	ELVOC	352.214	186.525	NA	NA	NA	NA	114480	0.0312924
443.05	C14H20O14S	O14S	CHOS	14	20	14	0	1	5	-9	1	1.42857	0.107437	444.057	0.142857	0	Aliphatic	-9.88926	ELVOC	NA	NA	NA	NA	NA	NA	114470	0.0312898
375.13	C16H24O10	O10	CHO	16	24	10	0	0	5	-5	0.625	1.5	0.0453177	376.137	-0.25	0	Aliphatic	-3.5899	ELVOC	338.963	187.337	73675.7	0.0504331	107193	0.0383524	114452	0.0312849
190.036	C6H9NO6	NO6	CHNO	6	9	6	1	0	3	-3	1	1.5	-0.0455178	191.043	-0.333333	0	Aliphatic	1.34477	SVOC	NA	NA	44310.6	0.0303319	75524.8	0.0270219	114363	0.0312605
366.098	C20H17NO6	NO6	CHNO	20	17	6	1	0	13	7	0.3	0.85	-0.160339	367.106	-0.5	0.5625	Aromatic	-3.76974	ELVOC	NA	NA	NA	NA	71568.3	0.0256063	114324	0.03125
287.129	C17H20O4	O4	CHO	17	20	4	0	0	8	4	0.235294	1.17647	0.0167172	288.136	-0.705882	0.4	Low O unsaturated	0.631069	SVOC	291.139	184.354	76523.7	0.0523827	114317	0.0409013	108764	0.0297299
280.01	C11H7NO8	NO8	CHNO	11	7	8	1	0	9	1	0.727273	0.636364	-0.190886	281.017	0.363636	0.666667	Aromatic	-2.03524	LVOC	NA	NA	NA	NA	87890.2	0.031446	114171	0.0312081
297.171	C16H26O5	O5	CHO	16	26	5	0	0	4	-1	0.3125	1.625	0.0180031	298.178	-1	0.111111	Low O unsaturated	1.33401	SVOC	304.808	186.262	114116	0.078116	98410.1	0.0352099	46327.1	0.0126633
477.14	C23H26O11	O11	CHO	23	26	11	0	0	11	0	0.478261	1.13043	-0.142306	478.147	-0.173913	0.314286	Low O unsaturated	-7.20196	ELVOC	353.616	191.512	NA	NA	64911.1	0.0232244	114087	0.0311852
517.099	C24H22O13	O13	CHO	24	22	13	0	0	14	1	0.541667	0.916667	-0.0953396	518.106	0.166667	0.428571	High O unsaturated	-10.1472	ELVOC	357.033	191.123	NA	NA	55700.9	0.0199291	113991	0.0311589
319.155	C18H24O5	O5	CHO	18	24	5	0	0	7	2	0.277778	1.33333	-0.0604722	320.162	-0.777778	0.290323	Low O unsaturated	-0.0131001	SVOC	308.117	186.582	64805.9	0.0443615	84363.1	0.0301841	113931	0.0311425
398.052	C19H13NO9	NO9	CHNO	19	13	9	1	0	14	5	0.473684	0.684211	-0.170958	399.059	-5.55e-17	0.62963	Aromatic	-5.58357	ELVOC	NA	NA	NA	NA	59882.9	0.0214253	113876	0.0311274
459.057	C21H16O12	O12	CHO	21	16	12	0	0	14	2	0.571429	0.761905	0.111097	460.064	0.380952	0.533333	Aromatic	-8.74095	ELVOC	343.787	187.232	NA	NA	NA	NA	113811	0.0311097
499.146	C22H28O13	O13	CHO	22	28	13	0	0	9	-4	0.590909	1.27273	0.0606035	500.153	-0.0909091	0.16129	High O unsaturated	-8.51589	ELVOC	361.733	192.279	NA	NA	60371.6	0.0216002	113696	0.0310783
525.089	C22H22O15	O15	CHO	22	22	15	0	0	12	-3	0.681818	1	0.0132359	526.096	0.363636	0.310345	High O unsaturated	-11.5336	ELVOC	361.949	190.831	NA	NA	NA	NA	113598	0.0310515
423.109	C23H20O8	O8	CHO	23	20	8	0	0	14	6	0.347826	0.869565	-0.0930021	424.116	-0.173913	0.526316	Aromatic	-5.41654	ELVOC	333.271	188.367	NA	NA	75437.1	0.0269905	113586	0.0310481
237.007	C7H10O7S	O7S	CHOS	7	10	7	0	1	3	-4	1	1.42857	0.011603	238.015	-0.285714	0	Aliphatic	-1.09716	LVOC	NA	NA	NA	NA	NA	NA	113539	0.0310352
214.015	C11H5NO4	NO4	CHNO	11	5	4	1	0	10	6	0.363636	0.454545	-0.0457913	215.022	-0.181818	0.875	Condensed aromatic	0.727615	SVOC	NA	NA	58909.7	0.0403254	113513	0.0406136	93372.6	0.0255229
361.108	C22H18O5	O5	CHO	22	18	5	0	0	14	9	0.227273	0.818182	-0.00623082	362.115	-0.363636	0.589744	Aromatic	-3.06379	LVOC	309.037	185.958	NA	NA	75916.1	0.0271619	113480	0.0310192
477.089	C18H22O15	O15	CHO	18	22	15	0	0	8	-7	0.833333	1.22222	-0.0479995	478.096	0.444444	0.047619	High O unsaturated	-10.305	ELVOC	359.596	188.987	NA	NA	NA	NA	113455	0.0310124
410.088	C21H17NO8	NO8	CHNO	21	17	8	1	0	14	6	0.380952	0.809524	0.112293	411.095	-0.285714	0.5625	Aromatic	-5.52551	ELVOC	NA	NA	NA	NA	52055.8	0.0186249	113376	0.0309907
186.041	C7H9NO5	NO5	CHNO	7	9	5	1	0	4	-1	0.714286	1.28571	-0.0448826	187.048	-0.571429	0.142857	High O unsaturated	1.7205	SVOC	NA	NA	82136.4	0.0562247	103267	0.0369478	113322	0.0309759
298.983	C14H4O8	O8	CHO	14	4	8	0	0	13	5	0.571429	0.285714	0.108869	299.991	0.857143	0.9	Condensed aromatic	-3.47286	LVOC	296.385	176.321	NA	NA	57769.7	0.0206693	113219	0.0309477
385.02	C18H10O10	O10	CHO	18	10	10	0	0	14	4	0.555556	0.555556	0.171939	386.027	0.555556	0.692308	Condensed aromatic	-6.30722	ELVOC	323.659	182.473	NA	NA	41813.5	0.0149603	113107	0.0309173
417.062	C23H14O8	O8	CHO	23	14	8	0	0	17	9	0.347826	0.608696	0.00323693	418.069	0.0869565	0.684211	Condensed aromatic	-6.24874	ELVOC	324.02	185.709	NA	NA	45178.4	0.0161643	113038	0.0308984
487.073	C19H20O15	O15	CHO	19	20	15	0	0	10	-5	0.789474	1.05263	0.0148848	488.08	0.526316	0.217391	High O unsaturated	-10.8616	ELVOC	358.151	188.765	NA	NA	NA	NA	112980	0.0308826
182.997	C4H8O6S	O6S	CHOS	4	8	6	0	1	1	-5	1.5	2	-0.047815	184.004	-0.5	0	Aliphatic	0.641336	SVOC	NA	NA	NA	NA	NA	NA	112962	0.0308775
462.104	C21H21NO11	NO11	CHNO	21	21	11	1	0	12	1	0.52381	1	0.0254272	463.111	-0.190476	0.37931	High O unsaturated	-7.46797	ELVOC	NA	NA	NA	NA	64805.3	0.0231865	112950	0.0308743
505.135	C24H26O12	O12	CHO	24	26	12	0	0	12	0	0.5	1.08333	-0.0922525	506.142	-0.0833333	0.333333	High O unsaturated	-8.60047	ELVOC	358.2	192.224	NA	NA	57257.8	0.0204861	112933	0.0308696
314.103	C17H17NO5	NO5	CHNO	17	17	5	1	0	10	5	0.294118	1	0.0716325	315.111	-0.705882	0.481481	Low O unsaturated	-1.89535	LVOC	NA	NA	63077.8	0.0431786	112873	0.0403844	110512	0.0302077
401.067	C23H14O7	O7	CHO	23	14	7	0	0	17	10	0.304348	0.608696	-0.00124668	402.074	0	0.692308	Condensed aromatic	-5.49119	ELVOC	318.343	185.32	NA	NA	49596	0.0177448	112861	0.0308499
230.082	C13H13NO3	NO3	CHNO	13	13	3	1	0	8	5	0.230769	1	-0.101051	231.09	-0.923077	0.52381	Aromatic	0.893393	SVOC	NA	NA	73618	0.0503937	112817	0.0403645	75614.7	0.0206689
483.151	C22H28O12	O12	CHO	22	28	12	0	0	9	-3	0.545455	1.27273	-0.119217	484.158	-0.181818	0.1875	High O unsaturated	-7.4798	ELVOC	358.243	192.002	NA	NA	60376.9	0.0216021	112791	0.0308308
298.02	C11H9NO9	NO9	CHNO	11	9	9	1	0	8	-1	0.818182	0.818182	-0.0627474	299.028	0.363636	0.454545	High O unsaturated	-2.69447	LVOC	NA	NA	NA	NA	62415.5	0.0223315	112620	0.0307842
371.093	C23H16O5	O5	CHO	23	16	5	0	0	16	11	0.217391	0.695652	0.256809	372.1	-0.26087	0.658537	Aromatic	-3.90816	ELVOC	307.501	185.417	NA	NA	NA	NA	112555	0.0307663
260.093	C14H15NO4	NO4	CHNO	14	15	4	1	0	8	4	0.285714	1.07143	-0.0213385	261.1	-0.857143	0.454545	Low O unsaturated	-0.0963431	SVOC	NA	NA	90102.7	0.0616779	112333	0.0401915	84480.4	0.0230923
533.13	C25H26O13	O13	CHO	25	26	13	0	0	13	0	0.52	1.04	-0.0944422	534.137	0	0.351351	High O unsaturated	-10.0096	ELVOC	362.288	192.918	NA	NA	44307	0.0158525	112273	0.0306893
167.05	C12H8O	O	CHO	12	8	1	0	0	9	8	0.0833333	0.666667	-0.00419036	168.058	-0.5	0.73913	Condensed aromatic	3.31254	IVOC	184.735	175.783	112178	0.0767888	75744.5	0.0271004	NA	NA
324.999	C16H6O8	O8	CHO	16	6	8	0	0	14	6	0.5	0.375	-0.096308	326.006	0.625	0.833333	Condensed aromatic	-4.02647	ELVOC	302.415	178.541	NA	NA	47253.1	0.0169066	112107	0.0306438
419.119	C17H24O12	O12	CHO	17	24	12	0	0	6	-6	0.705882	1.41176	-0.159382	420.127	0	0	Aliphatic	-6.17042	ELVOC	349.482	188.396	52930.9	0.0362327	102683	0.0367389	112067	0.0306328
387.051	C22H12O7	O7	CHO	22	12	7	0	0	17	10	0.318182	0.545455	0.105671	388.058	0.0909091	0.72973	Condensed aromatic	-5.24158	ELVOC	313.579	183.943	NA	NA	NA	NA	112048	0.0306276
310.021	C12H9NO9	NO9	CHNO	12	9	9	1	0	9	0	0.75	0.75	0.215631	311.028	0.333333	0.538462	Aromatic	-3.06309	LVOC	NA	NA	NA	NA	73345.7	0.0262422	112045	0.030627
446.109	C21H21NO10	NO10	CHNO	21	21	10	1	0	12	2	0.47619	1	-0.0217436	447.117	-0.285714	0.4	Low O unsaturated	-6.76315	ELVOC	NA	NA	NA	NA	58795.7	0.0210364	112036	0.0306246
399.06	C13H20O12S	O12S	CHOS	13	20	12	0	1	4	-8	0.923077	1.53846	0.161755	400.068	-0.153846	0	Aliphatic	-7.28106	ELVOC	NA	NA	NA	NA	NA	NA	111981	0.0306093
200.02	C7H7NO6	NO6	CHNO	7	7	6	1	0	5	-1	0.857143	1	-0.0542446	201.027	0	0.333333	High O unsaturated	0.909853	SVOC	NA	NA	48387.8	0.0331228	89042.4	0.0318583	111962	0.0306043
466.099	C20H21NO12	NO12	CHNO	20	21	12	1	0	11	-1	0.6	1.05	-0.0454839	467.106	-0.1	0.307692	High O unsaturated	-7.79723	ELVOC	NA	NA	NA	NA	59508.3	0.0212913	111954	0.0306019
332.056	C19H11NO5	NO5	CHNO	19	11	5	1	0	15	10	0.263158	0.578947	-0.258691	333.064	-0.315789	0.741935	Condensed aromatic	-2.92652	LVOC	NA	NA	NA	NA	54668.3	0.0195596	111943	0.0305989
392.078	C21H15NO7	NO7	CHNO	21	15	7	1	0	15	8	0.333333	0.714286	0.385638	393.085	-0.285714	0.636364	Aromatic	-4.91903	ELVOC	NA	NA	NA	NA	NA	NA	111923	0.0305935
318.077	C19H13NO4	NO4	CHNO	19	13	4	1	0	14	10	0.210526	0.684211	0.113966	319.085	-0.526316	0.6875	Condensed aromatic	-2.19567	LVOC	NA	NA	46577.7	0.0318838	77419.1	0.0276996	111879	0.0305816
301.051	C19H10O4	O4	CHO	19	10	4	0	0	15	11	0.210526	0.526316	0.241322	302.058	-0.105263	0.764706	Condensed aromatic	-1.88968	LVOC	280.681	180.534	58570.9	0.0400935	106983	0.0382772	111868	0.0305784
464.083	C20H19NO12	NO12	CHNO	20	19	12	1	0	12	0	0.6	0.95	0.0663674	465.091	0	0.384615	High O unsaturated	-7.87243	ELVOC	NA	NA	NA	NA	NA	NA	111844	0.0305719
292.01	C12H7NO8	NO8	CHNO	12	7	8	1	0	10	2	0.666667	0.583333	-0.326016	293.017	0.333333	0.714286	Condensed aromatic	-2.40959	LVOC	NA	NA	NA	NA	69758.8	0.0249588	111828	0.0305677
181.087	C10H14O3	O3	CHO	10	14	3	0	0	4	1	0.3	1.4	-0.0378271	182.094	-0.8	0.294118	Low O unsaturated	4.30166	IVOC	248.006	178.408	106947	0.0732081	111828	0.0400107	59818.4	0.016351
511.146	C23H28O13	O13	CHO	23	28	13	0	0	10	-3	0.565217	1.21739	-0.130002	512.153	-0.0869565	0.212121	High O unsaturated	-8.90921	ELVOC	362.641	192.72	NA	NA	NA	NA	111744	0.0305445
186.056	C11H9NO2	NO2	CHNO	11	9	2	1	0	8	6	0.181818	0.818182	-0.04891	187.063	-0.909091	0.666667	Aromatic	2.20502	SVOC	NA	NA	111592	0.0763876	104290	0.0373138	68774.4	0.0187991
461.145	C23H26O10	O10	CHO	23	26	10	0	0	11	1	0.434783	1.13043	0.0281907	462.153	-0.26087	0.333333	Low O unsaturated	-6.27715	ELVOC	349.564	191.197	NA	NA	68270.6	0.0244264	111503	0.0304788
335.005	C14H8O10	O10	CHO	14	8	10	0	0	11	1	0.714286	0.571429	0.244474	336.012	0.857143	0.666667	Aromatic	-5.11227	ELVOC	319.116	179.713	NA	NA	53528.1	0.0191517	111438	0.0304609
425.124	C23H22O8	O8	CHO	23	22	8	0	0	13	5	0.347826	0.956522	-0.132667	426.131	-0.26087	0.473684	Low O unsaturated	-5.13914	ELVOC	335.744	189.127	NA	NA	69108.7	0.0247263	111236	0.0304057
377.036	C13H14O13	O13	CHO	13	14	13	0	0	7	-6	1	1.07692	-0.288964	378.043	0.923077	0.0769231	High O unsaturated	-7.71567	ELVOC	341.555	182.967	NA	NA	NA	NA	111220	0.0304015
341.161	C17H26O7	O7	CHO	17	26	7	0	0	5	-2	0.411765	1.52941	-0.105815	342.168	-0.705882	0.111111	Low O unsaturated	-0.785674	LVOC	324.147	187.5	105877	0.0724759	111176	0.0397773	103634	0.0283279
346.993	C8H12O13S	O13S	CHOS	8	12	13	0	1	3	-10	1.625	1.5	0.261821	348	1	0	Aliphatic	-8.24183	ELVOC	NA	NA	NA	NA	NA	NA	111078	0.0303626
527.141	C23H28O14	O14	CHO	23	28	14	0	0	10	-4	0.608696	1.21739	0.0405015	528.148	0	0.1875	High O unsaturated	-9.96175	ELVOC	365.792	192.989	NA	NA	NA	NA	110960	0.0303302
415.14	C22H24O8	O8	CHO	22	24	8	0	0	11	3	0.363636	1.09091	-0.0515489	416.147	-0.363636	0.388889	Low O unsaturated	-4.35619	ELVOC	336.714	189.441	NA	NA	73317.2	0.026232	110917	0.0303186
163.076	C10H12O2	O2	CHO	10	12	2	0	0	5	3	0.2	1.2	-0.0137972	164.084	-0.8	0.444444	Low O unsaturated	4.65773	IVOC	221.31	177.207	104116	0.0712707	110837	0.0396562	62534.5	0.0170935
384.036	C18H11NO9	NO9	CHNO	18	11	9	1	0	14	5	0.5	0.611111	0	385.043	0.111111	0.68	Condensed aromatic	-5.27003	ELVOC	NA	NA	NA	NA	51677.7	0.0184896	110826	0.0302937
321.113	C20H18O4	O4	CHO	20	18	4	0	0	12	8	0.2	0.9	-0.0798784	322.121	-0.5	0.555556	Aromatic	-1.35407	LVOC	295.532	184.773	53655.6	0.0367288	81927.1	0.0293125	110804	0.0302877
174.056	C10H9NO2	NO2	CHNO	10	9	2	1	0	7	5	0.2	0.9	-0.052282	175.063	-1	0.625	Aromatic	2.6129	IVOC	NA	NA	104438	0.071491	110721	0.0396144	62599.6	0.0171113
491.104	C19H24O15	O15	CHO	19	24	15	0	0	8	-7	0.789474	1.26316	0.0617995	492.112	0.315789	0.0434783	High O unsaturated	-10.3068	ELVOC	362.127	190.137	NA	NA	NA	NA	110704	0.0302602
365.015	C15H10O11	O11	CHO	15	10	11	0	0	11	0	0.733333	0.666667	-0.462995	366.022	0.8	0.578947	Aromatic	-6.31244	ELVOC	327.871	181.55	NA	NA	49253.7	0.0176223	110548	0.0302178
346.072	C20H13NO5	NO5	CHNO	20	13	5	1	0	15	10	0.25	0.65	0.15806	347.079	-0.4	0.69697	Condensed aromatic	-3.25543	LVOC	NA	NA	NA	NA	64751.7	0.0231674	110541	0.0302158
279.018	C9H12O8S	O8S	CHOS	9	12	8	0	1	4	-4	0.888889	1.33333	0.055552	280.025	-0.222222	0	Aliphatic	-2.60539	LVOC	NA	NA	NA	NA	NA	NA	110464	0.0301948
423.024	C14H16O13S	O13S	CHOS	14	16	13	0	1	7	-6	0.928571	1.14286	0.0606349	424.031	0.285714	0	Aliphatic	-9.35455	ELVOC	NA	NA	NA	NA	NA	NA	110171	0.0301145
400.052	C15H15NO12	NO12	CHNO	15	15	12	1	0	9	-3	0.8	1	0.0266215	401.059	0.266667	0.25	High O unsaturated	-6.149	ELVOC	NA	NA	NA	NA	NA	NA	110104	0.0300965
333.119	C14H22O9	O9	CHO	14	22	9	0	0	4	-5	0.642857	1.57143	0.114674	334.126	-0.285714	0	Aliphatic	-2.04563	LVOC	328.748	185.363	94134	0.0644374	110026	0.0393659	102212	0.0279392
503.083	C23H20O13	O13	CHO	23	20	13	0	0	14	1	0.565217	0.869565	-0.0883552	504.09	0.26087	0.454545	High O unsaturated	-10.0188	ELVOC	353.914	189.968	NA	NA	NA	NA	109885	0.0300364
262.057	C9H13NO8	NO8	CHNO	9	13	8	1	0	4	-4	0.888889	1.44444	-0.319206	263.064	-0.222222	0	Aliphatic	-1.07488	LVOC	NA	NA	NA	NA	75929.5	0.0271667	109761	0.0300027
551.141	C25H28O14	O14	CHO	25	28	14	0	0	12	-2	0.56	1.12	-0.15096	552.148	0	0.277778	High O unsaturated	-10.7425	ELVOC	367.344	193.839	NA	NA	NA	NA	109640	0.0299695
539.104	C23H24O15	O15	CHO	23	24	15	0	0	12	-3	0.652174	1.04348	-0.0301426	540.112	0.26087	0.290323	High O unsaturated	-11.605	ELVOC	364.727	191.957	NA	NA	NA	NA	109565	0.0299491
327.066	C21H12O4	O4	CHO	21	12	4	0	0	16	12	0.190476	0.571429	-0.169079	328.074	-0.190476	0.736842	Condensed aromatic	-2.76425	LVOC	287.745	182.294	42371	0.0290041	77353.8	0.0276762	109558	0.029947
164.986	C4H6O5S	O5S	CHOS	4	6	5	0	1	2	-3	1.25	1.5	-0.0378819	165.994	-0.5	0	Aliphatic	1.54549	SVOC	NA	NA	NA	NA	NA	NA	109497	0.0299304
441.034	C14H18O14S	O14S	CHOS	14	18	14	0	1	6	-8	1	1.28571	0.0199531	442.042	0.285714	0	Aliphatic	-10.1907	ELVOC	NA	NA	NA	NA	NA	NA	109223	0.0298556
169.029	C11H6O2	O2	CHO	11	6	2	0	0	9	7	0.181818	0.545455	-0.0431877	170.037	-0.181818	0.8	Condensed aromatic	3.24579	IVOC	218.93	174.472	109088	0.0746742	76774.9	0.0274691	48114.1	0.0131517
413.145	C19H26O10	O10	CHO	19	26	10	0	0	7	-3	0.526316	1.36842	-0.0200898	414.153	-0.315789	0.142857	High O unsaturated	-4.50019	ELVOC	344.745	189.436	67295.2	0.0460655	105878	0.037882	109086	0.029818
443.135	C23H24O9	O9	CHO	23	24	9	0	0	12	3	0.391304	1.04348	-0.113284	444.142	-0.26087	0.405405	Low O unsaturated	-5.68037	ELVOC	343.008	190.195	47341.5	0.0324066	63645.6	0.0227716	109047	0.0298074
358.992	C9H12O13S	O13S	CHOS	9	12	13	0	1	4	-9	1.44444	1.33333	-0.292346	360	0.888889	0	Aliphatic	-8.47118	ELVOC	NA	NA	NA	NA	NA	NA	108988	0.0297911
445.135	C19H26O12	O12	CHO	19	26	12	0	0	7	-5	0.631579	1.36842	0.0995203	446.142	-0.105263	0.0769231	High O unsaturated	-6.59012	ELVOC	353.346	190.007	48445.4	0.0331623	91260.3	0.0326518	108900	0.0297671
248.041	C8H11NO8	NO8	CHNO	8	11	8	1	0	4	-4	1	1.375	-0.242702	249.048	0	0	Aliphatic	-0.791432	LVOC	NA	NA	NA	NA	59982.7	0.0214611	108846	0.0297525
263.129	C15H20O4	O4	CHO	15	20	4	0	0	6	2	0.266667	1.33333	-0.00988109	264.136	-0.8	0.307692	Low O unsaturated	1.74085	SVOC	285.896	183.466	78553.8	0.0537724	108645	0.0388719	85026.2	0.0232414
482.094	C20H21NO13	NO13	CHNO	20	21	13	1	0	11	-2	0.65	1.05	-0.10724	483.101	0	0.28	High O unsaturated	-8.51749	ELVOC	NA	NA	NA	NA	NA	NA	108636	0.029695
533.094	C24H22O14	O14	CHO	24	22	14	0	0	14	0	0.583333	0.916667	-0.0606835	534.101	0.25	0.411765	High O unsaturated	-11.1782	ELVOC	360.107	191.399	NA	NA	NA	NA	108630	0.0296935
346.041	C12H13NO11	NO11	CHNO	12	13	11	1	0	7	-4	0.916667	1.08333	-0.294184	347.049	0.333333	0.0909091	High O unsaturated	-4.39108	ELVOC	NA	NA	NA	NA	NA	NA	108607	0.029687
385.072	C23H14O6	O6	CHO	23	14	6	0	0	17	11	0.26087	0.608696	-0.064923	386.079	-0.0869565	0.7	Condensed aromatic	-4.80106	ELVOC	311.789	184.902	NA	NA	60302.8	0.0215756	108606	0.029687
490.099	C22H21NO12	NO12	CHNO	22	21	12	1	0	13	1	0.545455	0.954545	-0.0923283	491.106	-0.0909091	0.4	High O unsaturated	-8.56288	ELVOC	NA	NA	NA	NA	49722.9	0.0177902	108595	0.0296838
460.089	C21H19NO11	NO11	CHNO	21	19	11	1	0	13	2	0.52381	0.904762	0.169859	461.096	-0.0952381	0.448276	High O unsaturated	-7.54317	ELVOC	NA	NA	NA	NA	47867.1	0.0171263	108528	0.0296657
388.052	C14H15NO12	NO12	CHNO	14	15	12	1	0	8	-4	0.857143	1.07143	-0.265944	389.059	0.285714	0.142857	High O unsaturated	-5.78326	ELVOC	NA	NA	NA	NA	NA	NA	108468	0.0296492
166.999	C7H4O5	O5	CHO	7	4	5	0	0	6	1	0.714286	0.571429	-0.0494016	168.006	0.857143	0.777778	Aromatic	2.36253	SVOC	269.557	172.644	54118.4	0.0370456	108324	0.0387571	97466.6	0.026642
309.004	C16H6O7	O7	CHO	16	6	7	0	0	14	7	0.4375	0.375	0.0181227	310.011	0.5	0.84	Condensed aromatic	-3.08841	LVOC	295.557	178.193	NA	NA	68759	0.0246011	108296	0.0296021
346.021	C15H9NO9	NO9	CHNO	15	9	9	1	0	12	3	0.6	0.6	0.323536	347.028	0.266667	0.684211	Condensed aromatic	-4.19158	ELVOC	NA	NA	NA	NA	46555	0.0166568	108258	0.0295916
186.02	C10H5NO3	NO3	CHNO	10	5	3	1	0	9	6	0.3	0.5	-0.0766048	187.027	-0.4	0.866667	Condensed aromatic	1.80381	SVOC	NA	NA	94741.1	0.064853	101205	0.0362098	108223	0.0295822
343.097	C22H16O4	O4	CHO	22	16	4	0	0	15	11	0.181818	0.727273	-0.343343	344.105	-0.363636	0.65	Aromatic	-2.79095	LVOC	296.366	184.606	NA	NA	65859.7	0.0235638	108169	0.0295674
270.988	C13H4O7	O7	CHO	13	4	7	0	0	12	5	0.538462	0.307692	0.0773096	271.996	0.769231	0.894737	Condensed aromatic	-2.04355	LVOC	289.576	175.653	NA	NA	67971.9	0.0243195	108162	0.0295654
395.083	C14H20O13	O13	CHO	14	20	13	0	0	5	-8	0.928571	1.42857	0.217549	396.091	0.428571	0	Aliphatic	-7.09359	ELVOC	347.383	185.744	NA	NA	NA	NA	108133	0.0295577
437.094	C16H22O14	O14	CHO	16	22	14	0	0	6	-8	0.875	1.375	-0.119654	438.101	0.375	0	Aliphatic	-8.55135	ELVOC	354.671	187.728	NA	NA	NA	NA	108067	0.0295396
427.019	C13H16O14S	O14S	CHOS	13	16	14	0	1	6	-8	1.07692	1.23077	0.105031	428.026	0.461538	0	Aliphatic	-10.1737	ELVOC	NA	NA	NA	NA	NA	NA	108055	0.0295364
483.093	C24H20O11	O11	CHO	24	20	11	0	0	15	4	0.458333	0.833333	-0.157527	484.1	0.0833333	0.513514	Aromatic	-8.48323	ELVOC	347.544	189.763	NA	NA	NA	NA	107952	0.0295082
407.114	C23H20O7	O7	CHO	23	20	7	0	0	14	7	0.304348	0.869565	0.229911	408.121	-0.26087	0.538462	Aromatic	-4.65899	ELVOC	327.594	187.983	NA	NA	75341.4	0.0269562	107910	0.0294967
329.046	C20H10O5	O5	CHO	20	10	5	0	0	16	11	0.25	0.5	0.129465	330.053	0	0.771429	Condensed aromatic	-3.05307	LVOC	292.309	181.313	43219.2	0.0295848	NA	NA	107769	0.029458
363.003	C12H12O11S	O11S	CHOS	12	12	11	0	1	7	-4	0.916667	1	0.324378	364.01	0.333333	0.0909091	High O unsaturated	-7.01609	ELVOC	NA	NA	NA	NA	NA	NA	107767	0.0294575
335.026	C11H12O12	O12	CHO	11	12	12	0	0	6	-6	1.09091	1.09091	-0.270427	336.033	1.09091	0	Aliphatic	-6.31795	ELVOC	334.261	180.79	NA	NA	NA	NA	107698	0.0294387
387.087	C23H16O6	O6	CHO	23	16	6	0	0	16	10	0.26087	0.695652	-0.270223	388.095	-0.173913	0.65	Aromatic	-4.52366	ELVOC	315.252	185.866	NA	NA	61097.9	0.0218601	107687	0.0294356
435.114	C17H24O13	O13	CHO	17	24	13	0	0	6	-7	0.764706	1.41176	-0.0229825	436.122	0.117647	0	Aliphatic	-7.33459	ELVOC	353.475	188.65	NA	NA	NA	NA	107572	0.0294043
549.125	C25H26O14	O14	CHO	25	26	14	0	0	13	-1	0.56	1.04	-0.0424311	550.132	0.08	0.333333	High O unsaturated	-11.0199	ELVOC	365.289	193.196	NA	NA	NA	NA	107477	0.0293783
364.031	C15H11NO10	NO10	CHNO	15	11	10	1	0	11	1	0.666667	0.733333	-0.034063	365.038	0.266667	0.555556	Aromatic	-4.83753	ELVOC	NA	NA	NA	NA	NA	NA	107449	0.0293705
393.013	C13H14O12S	O12S	CHOS	13	14	12	0	1	7	-5	0.923077	1.07692	0.123024	394.021	0.307692	0	Aliphatic	-8.18526	ELVOC	NA	NA	NA	NA	NA	NA	107391	0.0293548
282.098	C13H17NO6	NO6	CHNO	13	17	6	1	0	6	0	0.461538	1.30769	-0.10546	283.106	-0.769231	0.222222	Low O unsaturated	-0.992216	LVOC	NA	NA	85129.7	0.0582737	107350	0.0384084	105376	0.028804
320.114	C16H19NO6	NO6	CHNO	16	19	6	1	0	8	2	0.375	1.1875	0.192588	321.121	-0.75	0.333333	Low O unsaturated	-2.09805	LVOC	NA	NA	67995	0.0465445	96853.6	0.034653	107343	0.0293416
475.073	C18H20O15	O15	CHO	18	20	15	0	0	9	-6	0.833333	1.11111	-0.146925	476.08	0.555556	0.142857	High O unsaturated	-10.5824	ELVOC	357.629	188.29	NA	NA	NA	NA	107336	0.0293396
376.089	C14H19NO11	NO11	CHNO	14	19	11	1	0	6	-5	0.785714	1.35714	0.0565027	377.096	-0.142857	0	Aliphatic	-4.89446	ELVOC	NA	NA	NA	NA	NA	NA	107273	0.0293224
349.023	C12H14O10S	O10S	CHOS	12	14	10	0	1	6	-4	0.833333	1.16667	-0.00988472	350.031	0	0	Aliphatic	-5.59832	ELVOC	NA	NA	NA	NA	NA	NA	107249	0.029316
419.077	C23H16O8	O8	CHO	23	16	8	0	0	16	8	0.347826	0.695652	0.0684838	420.085	0	0.631579	Aromatic	-5.97134	ELVOC	327.484	186.669	NA	NA	NA	NA	107180	0.0292972
405.098	C23H18O7	O7	CHO	23	18	7	0	0	15	8	0.304348	0.782609	0.0123427	406.105	-0.173913	0.589744	Aromatic	-4.93639	ELVOC	324.861	187.165	NA	NA	64799.8	0.0231846	107142	0.0292867
451.052	C19H16O13	O13	CHO	19	16	13	0	0	12	-1	0.684211	0.842105	0.111074	452.059	0.526316	0.44	High O unsaturated	-9.08677	ELVOC	346.534	186.682	NA	NA	NA	NA	107062	0.0292649
295.155	C16H24O5	O5	CHO	16	24	5	0	0	5	0	0.3125	1.5	0.0674222	296.162	-0.875	0.185185	Low O unsaturated	1.05661	SVOC	303.36	185.66	81221.1	0.0555982	106998	0.0382825	75988.1	0.0207709
198.992	C4H8O7S	O7S	CHOS	4	8	7	0	1	1	-6	1.75	2	-0.097994	199.999	0	7	Aromatic	-0.591209	LVOC	NA	NA	NA	NA	NA	NA	106962	0.0292374
373.15	C17H26O9	O9	CHO	17	26	9	0	0	5	-4	0.529412	1.52941	-0.109607	374.158	-0.470588	0.04	High O unsaturated	-2.66395	LVOC	336.684	188.157	82171.8	0.056249	106894	0.0382452	95240.1	0.0260334
435.072	C23H16O9	O9	CHO	23	16	9	0	0	16	7	0.391304	0.695652	0.216631	436.08	0.0869565	0.621622	Aromatic	-6.78997	ELVOC	332.491	187.032	NA	NA	48780.6	0.0174531	106871	0.0292127
430.114	C21H21NO9	NO9	CHNO	21	21	9	1	0	12	3	0.428571	1	0.240169	431.122	-0.380952	0.419355	Low O unsaturated	-6.06529	ELVOC	NA	NA	NA	NA	70312.6	0.025157	106786	0.0291893
511.073	C21H20O15	O15	CHO	21	20	15	0	0	12	-3	0.714286	0.952381	-0.15125	512.08	0.47619	0.333333	High O unsaturated	-11.4775	ELVOC	359.118	189.663	NA	NA	NA	NA	106721	0.0291716
531.114	C25H24O13	O13	CHO	25	24	13	0	0	14	1	0.52	0.96	-0.0948007	532.122	0.08	0.405405	High O unsaturated	-10.287	ELVOC	360.068	192.236	NA	NA	NA	NA	106705	0.0291671
445.029	C13H18O15S	O15S	CHOS	13	18	15	0	1	5	-10	1.15385	1.38462	-0.177853	446.037	0.461538	0	Aliphatic	-11.0397	ELVOC	NA	NA	NA	NA	NA	NA	106637	0.0291486
244.997	C5H10O9S	O9S	CHOS	5	10	9	0	1	1	-8	1.8	2	-0.0512251	246.005	0.4	9	Aromatic	-2.97414	LVOC	NA	NA	NA	NA	NA	NA	106549	0.0291246
405.034	C11H18O14S	O14S	CHOS	11	18	14	0	1	3	-11	1.27273	1.63636	-0.0961647	406.042	0.363636	0	Aliphatic	-9.28766	ELVOC	NA	NA	NA	NA	NA	NA	106495	0.0291099
428.099	C21H19NO9	NO9	CHNO	21	19	9	1	0	13	4	0.428571	0.904762	-0.0105116	429.106	-0.285714	0.483871	Low O unsaturated	-6.14049	ELVOC	NA	NA	NA	NA	67672.8	0.0242125	106461	0.0291005
390.119	C19H21NO8	NO8	CHNO	19	21	8	1	0	10	2	0.421053	1.10526	-0.0670308	391.127	-0.526316	0.357143	Low O unsaturated	-4.58569	ELVOC	NA	NA	48630.6	0.0332891	79147.5	0.028318	106380	0.0290784
450.068	C19H17NO12	NO12	CHNO	19	17	12	1	0	12	0	0.631579	0.894737	0.162087	451.075	0.105263	0.416667	High O unsaturated	-7.56782	ELVOC	NA	NA	NA	NA	NA	NA	106225	0.029036
435.109	C24H20O8	O8	CHO	24	20	8	0	0	15	7	0.333333	0.833333	0.0225231	436.116	-0.166667	0.55	Aromatic	-5.92947	ELVOC	334.335	188.733	NA	NA	45852.6	0.0164055	106213	0.0290328
489.14	C24H26O11	O11	CHO	24	26	11	0	0	12	1	0.458333	1.08333	-0.0240217	490.148	-0.166667	0.351351	Low O unsaturated	-7.65103	ELVOC	354.591	191.922	NA	NA	65173.2	0.0233182	106183	0.0290246
381.067	C13H18O13	O13	CHO	13	18	13	0	0	5	-8	1	1.38462	-0.0191567	382.075	0.615385	0	Aliphatic	-7.16087	ELVOC	344.975	184.492	NA	NA	NA	NA	106069	0.0289934
384.109	C20H19NO7	NO7	CHNO	20	19	7	1	0	12	5	0.35	0.95	-0.0139283	385.116	-0.5	0.483871	Low O unsaturated	-4.36995	ELVOC	NA	NA	NA	NA	78854.5	0.0282132	106052	0.0289888
347.005	C15H8O10	O10	CHO	15	8	10	0	0	12	2	0.666667	0.533333	0.138903	348.012	0.8	0.7	Condensed aromatic	-5.44967	ELVOC	319.099	180.124	NA	NA	NA	NA	105929	0.0289551
302.103	C16H17NO5	NO5	CHNO	16	17	5	1	0	9	4	0.3125	1.0625	-0.173947	303.111	-0.75	0.44	Low O unsaturated	-1.49416	LVOC	NA	NA	63633.2	0.0435588	101688	0.0363826	105889	0.0289441
354.119	C16H21NO8	NO8	CHNO	16	21	8	1	0	7	-1	0.5	1.3125	-0.220688	355.127	-0.625	0.181818	High O unsaturated	-3.41357	LVOC	NA	NA	56574.3	0.0387267	80164.4	0.0286818	105580	0.0288597
354.025	C17H9NO8	NO8	CHNO	17	9	8	1	0	14	6	0.470588	0.529412	-0.117647	355.033	0.117647	0.75	Condensed aromatic	-4.25362	ELVOC	NA	NA	NA	NA	49773.5	0.0178083	105517	0.0288426
421.057	C22H14O9	O9	CHO	22	14	9	0	0	16	7	0.409091	0.636364	0.111743	422.064	0.181818	0.657143	Aromatic	-6.58389	ELVOC	328.387	185.727	NA	NA	49974.4	0.0178802	105495	0.0288365
296.093	C17H15NO4	NO4	CHNO	17	15	4	1	0	11	7	0.235294	0.882353	0.0162111	297.1	-0.705882	0.571429	Aromatic	-1.30823	LVOC	NA	NA	63353.5	0.0433673	105473	0.0377368	102578	0.0280392
489.125	C20H26O14	O14	CHO	20	26	14	0	0	8	-6	0.7	1.3	0.0831076	490.132	0.1	0.0769231	High O unsaturated	-9.17094	ELVOC	361.491	191.006	NA	NA	NA	NA	105472	0.0288303
445.15	C23H26O9	O9	CHO	23	26	9	0	0	11	2	0.391304	1.13043	-0.086263	446.158	-0.347826	0.351351	Low O unsaturated	-5.40297	ELVOC	345.084	190.864	NA	NA	79208.2	0.0283397	105379	0.0288047
228.999	C8H6O8	O8	CHO	8	6	8	0	0	6	-2	1	0.75	-0.100437	230.006	1.25	0.5	High O unsaturated	-1.32727	LVOC	303.127	175.196	NA	NA	55890.1	0.0199968	105149	0.028742
242.082	C14H13NO3	NO3	CHNO	14	13	3	1	0	9	6	0.214286	0.928571	-0.029742	243.09	-0.857143	0.565217	Aromatic	0.487262	SVOC	NA	NA	82352.8	0.0563729	105116	0.037609	81069.9	0.02216
446.073	C20H17NO11	NO11	CHNO	20	17	11	1	0	13	2	0.55	0.85	0.0293674	447.08	1.11e-16	0.481481	High O unsaturated	-7.23311	ELVOC	NA	NA	NA	NA	51671.7	0.0184875	105057	0.0287166
429.14	C19H26O11	O11	CHO	19	26	11	0	0	7	-4	0.578947	1.36842	0.0461388	430.148	-0.210526	0.111111	High O unsaturated	-5.52215	ELVOC	349.242	189.729	64880	0.0444123	105034	0.0375799	104296	0.0285086
334.078	C12H17NO10	NO10	CHNO	12	17	10	1	0	5	-5	0.833333	1.41667	0.110902	335.085	-0.166667	0	Aliphatic	-3.4983	LVOC	NA	NA	NA	NA	NA	NA	104831	0.0286549
409.062	C14H18O14	O14	CHO	14	18	14	0	0	6	-8	1	1.28571	0.139465	410.07	0.714286	0	Aliphatic	-8.66047	ELVOC	349.829	185.278	NA	NA	NA	NA	104703	0.0286201
392.084	C14H19NO12	NO12	CHNO	14	19	12	1	0	6	-6	0.857143	1.35714	0.354771	393.091	-1.11e-16	0	Aliphatic	-5.63286	ELVOC	NA	NA	NA	NA	NA	NA	104692	0.028617
225.092	C15H14O2	O2	CHO	15	14	2	0	0	9	7	0.133333	0.933333	0.0404279	226.099	-0.666667	0.571429	Aromatic	1.9846	SVOC	243.245	180.231	86920.6	0.0594997	104507	0.0373913	94492.6	0.025829
334.02	C14H9NO9	NO9	CHNO	14	9	9	1	0	11	2	0.642857	0.642857	-0.0362253	335.028	0.285714	0.647059	Aromatic	-3.81214	ELVOC	NA	NA	NA	NA	59101.1	0.0211457	104432	0.028546
150.02	C7H5NO3	NO3	CHNO	7	5	3	1	0	6	3	0.428571	0.714286	-0.012665	151.027	-0.571429	0.777778	Aromatic	2.99675	IVOC	NA	NA	77942	0.0533536	104368	0.0373415	61601.2	0.0168384
413.036	C16H14O13	O13	CHO	16	14	13	0	0	10	-3	0.8125	0.875	0.102412	414.043	0.75	0.368421	High O unsaturated	-8.4316	ELVOC	342.686	184.467	NA	NA	NA	NA	104239	0.0284932
372.036	C17H11NO9	NO9	CHNO	17	11	9	1	0	13	4	0.529412	0.647059	-0.241778	373.043	0.117647	0.652174	Aromatic	-4.88322	ELVOC	NA	NA	NA	NA	61018.8	0.0218318	104227	0.0284898
565.12	C25H26O15	O15	CHO	25	26	15	0	0	13	-2	0.6	1.04	0.078125	566.127	0.16	0.314286	High O unsaturated	-12.0665	ELVOC	368.082	193.461	NA	NA	NA	NA	104081	0.02845
387.06	C12H20O12S	O12S	CHOS	12	20	12	0	1	3	-9	1	1.66667	0.33199	388.068	-0.166667	0	Aliphatic	-6.94666	ELVOC	NA	NA	NA	NA	NA	NA	104072	0.0284474
361.166	C20H26O6	O6	CHO	20	26	6	0	0	8	2	0.3	1.3	0.118644	362.173	-0.7	0.294118	Low O unsaturated	-1.5114	LVOC	322.58	188.498	NA	NA	78716.5	0.0281638	104053	0.0284423
402.119	C20H21NO8	NO8	CHNO	20	21	8	1	0	11	3	0.4	1.05	-0.0308366	403.127	-0.5	0.4	Low O unsaturated	-4.97972	ELVOC	NA	NA	42378.2	0.0290091	76732.8	0.027454	104048	0.0284409
553.12	C24H26O15	O15	CHO	24	26	15	0	0	12	-3	0.625	1.08333	0.106035	554.127	0.166667	0.272727	High O unsaturated	-11.6905	ELVOC	367.456	193.047	NA	NA	45519.2	0.0162862	104022	0.0284338
373.072	C22H14O6	O6	CHO	22	14	6	0	0	16	10	0.272727	0.636364	-0.289355	374.079	-0.0909091	0.684211	Condensed aromatic	-4.25345	ELVOC	310.709	184.574	NA	NA	84292.9	0.030159	103989	0.0284249
458.094	C18H21NO13	NO13	CHNO	18	21	13	1	0	9	-4	0.722222	1.16667	-0.0924483	459.101	-1.11e-16	0.142857	High O unsaturated	-7.76727	ELVOC	NA	NA	NA	NA	56276.4	0.020135	103687	0.0283422
499.125	C25H24O11	O11	CHO	25	24	11	0	0	14	3	0.44	0.96	-0.0388681	500.132	-0.08	0.435897	Low O unsaturated	-8.38721	ELVOC	353.305	191.636	NA	NA	NA	NA	103679	0.0283402
219.045	C15H8O2	O2	CHO	15	8	2	0	0	12	10	0.133333	0.533333	-0.0248807	220.052	-0.266667	0.785714	Condensed aromatic	1.1524	SVOC	233.899	177.094	103628	0.070936	96708.2	0.034601	69425.8	0.0189772
265.02	C8H10O10	O10	CHO	8	10	10	0	0	4	-6	1.25	1.25	-0.00848992	266.027	1.25	0	Aliphatic	-3.47874	LVOC	319.952	177.685	NA	NA	NA	NA	103562	0.028308
340.994	C16H6O9	O9	CHO	16	6	9	0	0	14	5	0.5625	0.375	0.186807	342.001	0.75	0.826087	Condensed aromatic	-5.02829	ELVOC	308.465	178.866	NA	NA	NA	NA	103547	0.028304
262.051	C16H9NO3	NO3	CHNO	16	9	3	1	0	13	10	0.1875	0.5625	0.0534247	263.058	-0.5	0.777778	Condensed aromatic	-0.477853	SVOC	NA	NA	63650.7	0.0435707	79236.8	0.02835	103226	0.0282163
341.055	C11H18O10S	O10S	CHOS	11	18	10	0	1	3	-7	0.909091	1.63636	0.191172	342.062	-0.363636	0	Aliphatic	-4.64145	ELVOC	NA	NA	NA	NA	NA	NA	103210	0.0282118
499.088	C24H20O12	O12	CHO	24	20	12	0	0	15	3	0.5	0.833333	0.056503	500.095	0.166667	0.5	High O unsaturated	-9.43267	ELVOC	351.153	190.069	NA	NA	44046.3	0.0157592	103206	0.0282107
258.988	C12H4O7	O7	CHO	12	4	7	0	0	11	4	0.583333	0.333333	0.0310825	259.996	0.833333	0.882353	Condensed aromatic	-1.64134	LVOC	290.099	175.3	NA	NA	62794.5	0.0224671	103166	0.0281998
474.104	C22H21NO11	NO11	CHNO	22	21	11	1	0	13	2	0.5	0.954545	-0.205756	475.111	-0.181818	0.419355	High O unsaturated	-7.85497	ELVOC	NA	NA	NA	NA	47210.6	0.0168914	103124	0.0281884
266.082	C16H13NO3	NO3	CHNO	16	13	3	1	0	11	8	0.1875	0.8125	-0.0317571	267.09	-0.75	0.62963	Aromatic	-0.327453	SVOC	NA	NA	72825.2	0.049851	103087	0.0368834	87685.1	0.0239682
389.103	C23H18O6	O6	CHO	23	18	6	0	0	15	9	0.26087	0.782609	-0.0674628	390.11	-0.26087	0.6	Aromatic	-4.24626	ELVOC	318.307	186.751	NA	NA	65334.5	0.0233759	103060	0.0281708
396.109	C21H19NO7	NO7	CHNO	21	19	7	1	0	13	6	0.333333	0.904762	0.422485	397.116	-0.47619	0.515152	Aromatic	-4.76863	ELVOC	NA	NA	NA	NA	68488.4	0.0245043	103034	0.0281637
519.099	C20H24O16	O16	CHO	20	24	16	0	0	9	-7	0.8	1.2	-0.21152	520.106	0.4	0.0833333	High O unsaturated	-11.7952	ELVOC	365.789	190.851	NA	NA	NA	NA	102826	0.0281069
417.14	C18H26O11	O11	CHO	18	26	11	0	0	6	-5	0.611111	1.44444	-0.111473	418.147	-0.222222	0.04	High O unsaturated	-5.13735	ELVOC	348.004	189.242	74784.5	0.0511922	88736.7	0.0317489	102815	0.028104
381.155	C19H26O8	O8	CHO	19	26	8	0	0	7	-1	0.421053	1.36842	-0.292269	382.163	-0.526316	0.2	Low O unsaturated	-2.61472	LVOC	334.219	188.795	75689.9	0.051812	96478.2	0.0345187	102803	0.0281005
369.077	C23H14O5	O5	CHO	23	14	5	0	0	17	12	0.217391	0.608696	0.0070446	370.084	-0.173913	0.707317	Condensed aromatic	-4.18556	ELVOC	304.037	184.451	NA	NA	NA	NA	102786	0.0280961
480.115	C21H23NO12	NO12	CHNO	21	23	12	1	0	11	-1	0.571429	1.09524	-0.144236	481.122	-0.190476	0.285714	High O unsaturated	-8.10391	ELVOC	NA	NA	NA	NA	55536.8	0.0198704	102758	0.0280884
246.026	C8H9NO8	NO8	CHNO	8	9	8	1	0	5	-3	1	1.125	-0.141042	247.033	0.25	0	Aliphatic	-0.866632	LVOC	NA	NA	NA	NA	62838.2	0.0224827	102717	0.0280771
170.009	C6H5NO5	NO5	CHNO	6	5	5	1	0	5	0	0.833333	0.833333	-0.0823483	171.017	1.11e-16	0.6	Aromatic	1.93953	SVOC	NA	NA	53719.1	0.0367723	102713	0.0367493	66642.8	0.0182164
332.114	C17H19NO6	NO6	CHNO	17	19	6	1	0	9	3	0.352941	1.11765	0.0849106	333.121	-0.705882	0.384615	Low O unsaturated	-2.49525	LVOC	NA	NA	63004.4	0.0431283	80905.7	0.028947	102698	0.0280718
230.067	C9H13NO6	NO6	CHNO	9	13	6	1	0	4	-2	0.666667	1.44444	-0.0221675	231.074	-0.666667	0	Aliphatic	0.394348	SVOC	NA	NA	90522.9	0.0619656	102693	0.0367422	96995.5	0.0265132
172.04	C10H7NO2	NO2	CHNO	10	7	2	1	0	8	6	0.2	0.7	-0.0174378	173.048	-0.8	0.75	Condensed aromatic	2.5377	IVOC	NA	NA	102676	0.0702844	75711.7	0.0270887	68489	0.0187211
253.039	C8H14O7S	O7S	CHOS	8	14	7	0	1	2	-5	0.875	1.75	-0.0337893	254.046	-0.75	0	Aliphatic	-0.834331	LVOC	NA	NA	NA	NA	NA	NA	102641	0.0280564
439.055	C15H20O13S	O13S	CHOS	15	20	13	0	1	6	-7	0.866667	1.33333	-0.0775529	440.062	1.11e-16	0	Aliphatic	-9.09989	ELVOC	NA	NA	NA	NA	NA	NA	102640	0.0280561
201.092	C13H14O2	O2	CHO	13	14	2	0	0	7	5	0.153846	1.07692	-0.0310803	202.099	-0.769231	0.5	Low O unsaturated	3.17829	IVOC	235.935	179.415	77457.7	0.0530221	102604	0.0367105	72687.7	0.0198688
218.031	C7H9NO7	NO7	CHNO	7	9	7	1	0	4	-3	1	1.28571	-0.0850798	219.038	0	0	Aliphatic	0.239068	SVOC	NA	NA	NA	NA	76077.7	0.0272197	102580	0.0280398
496.11	C21H23NO13	NO13	CHNO	21	23	13	1	0	11	-2	0.619048	1.09524	-0.064905	497.117	-0.0952381	0.259259	High O unsaturated	-8.82083	ELVOC	NA	NA	NA	NA	NA	NA	102500	0.0280178
301.145	C18H22O4	O4	CHO	18	22	4	0	0	8	4	0.222222	1.22222	-0.0712283	302.152	-0.777778	0.375	Low O unsaturated	0.344181	SVOC	295.5	185.482	63810.3	0.04368	93624.3	0.0334976	102463	0.0280076
219.087	C9H16O6	O6	CHO	9	16	6	0	0	2	-4	0.666667	1.77778	-0.0365151	220.095	-0.444444	0	Aliphatic	2.21857	SVOC	289.748	179.598	102446	0.070127	96309.1	0.0344582	54124	0.0147945
458.073	C21H17NO11	NO11	CHNO	21	17	11	1	0	14	3	0.52381	0.809524	-0.0509744	459.08	5.55e-17	0.517241	Aromatic	-7.61837	ELVOC	NA	NA	NA	NA	NA	NA	102419	0.0279956
245.061	C17H10O2	O2	CHO	17	10	2	0	0	13	11	0.117647	0.588235	-0.101607	246.068	-0.352941	0.75	Condensed aromatic	0.224758	SVOC	243.109	178.927	85236.3	0.0583467	102400	0.0366373	82086.9	0.022438
316.982	C7H10O12S	O12S	CHOS	7	10	12	0	1	3	-9	1.71429	1.42857	-0.0801307	317.989	1.14286	0	Aliphatic	-7.09809	ELVOC	NA	NA	NA	NA	NA	NA	102394	0.0279888
451.073	C16H20O15	O15	CHO	16	20	15	0	0	7	-8	0.9375	1.25	0.0508787	452.08	0.625	0	Aliphatic	-10.0907	ELVOC	356.49	187.283	NA	NA	NA	NA	102387	0.0279869
137.061	C8H10O2	O2	CHO	8	10	2	0	0	4	2	0.25	1.25	-0.0342913	138.068	-0.75	0.428571	Low O unsaturated	5.51337	IVOC	210.086	175.348	98935.3	0.0677241	102337	0.0366149	NA	NA
306.047	C10H13NO10	NO10	CHNO	10	13	10	1	0	5	-5	1	1.3	-0.184939	307.054	0.2	0	Aliphatic	-2.92763	LVOC	NA	NA	NA	NA	NA	NA	102283	0.0279586
239.129	C13H20O4	O4	CHO	13	20	4	0	0	4	0	0.307692	1.53846	-0.0719277	240.136	-0.923077	0.181818	Low O unsaturated	2.81821	IVOC	279.901	182.495	102253	0.0699952	92013.3	0.0329212	62269.3	0.017021
444.078	C17H19NO13	NO13	CHNO	17	19	13	1	0	9	-4	0.764706	1.11765	-0.123064	445.086	0.117647	0.157895	High O unsaturated	-7.47124	ELVOC	NA	NA	NA	NA	NA	NA	102227	0.0279432
470.094	C19H21NO13	NO13	CHNO	19	21	13	1	0	10	-3	0.684211	1.10526	-0.0571162	471.101	-5.55e-17	0.217391	High O unsaturated	-8.14117	ELVOC	NA	NA	NA	NA	NA	NA	102214	0.0279397
335.098	C13H20O10	O10	CHO	13	20	10	0	0	4	-6	0.769231	1.53846	-0.0395406	336.106	0	0	Aliphatic	-3.13538	LVOC	331.604	184.439	39456	0.0270088	68335.5	0.0244496	102171	0.0279278
467.156	C22H28O11	O11	CHO	22	28	11	0	0	9	-2	0.5	1.27273	0.0834839	468.163	-0.272727	0.212121	High O unsaturated	-6.48607	ELVOC	354.449	191.71	NA	NA	69134	0.0247353	102032	0.02789
383.065	C13H20O11S	O11S	CHOS	13	20	11	0	1	4	-7	0.846154	1.53846	-0.187566	384.073	-0.307692	0	Aliphatic	-6.16226	ELVOC	NA	NA	NA	NA	NA	NA	102000	0.0278812
424.125	C19H23NO10	NO10	CHNO	19	23	10	1	0	9	-1	0.526316	1.21053	0.122487	425.132	-0.421053	0.230769	High O unsaturated	-5.91239	ELVOC	NA	NA	NA	NA	58422.6	0.0209029	101990	0.0278783
180.067	C9H11NO3	NO3	CHNO	9	11	3	1	0	5	2	0.333333	1.22222	-0.0524806	181.074	-1.11111	0.384615	Low O unsaturated	2.42977	SVOC	NA	NA	93510.2	0.0640104	101955	0.0364782	49969.3	0.0136588
203.994	C9H3NO5	NO5	CHNO	9	3	5	1	0	9	4	0.555556	0.333333	-0.0242654	205.001	0.222222	1	Condensed aromatic	0.736982	SVOC	NA	NA	50365.1	0.0344764	101930	0.0364691	78097.6	0.0213476
495.151	C23H28O12	O12	CHO	23	28	12	0	0	10	-2	0.521739	1.21739	0.0444309	496.158	-0.173913	0.235294	High O unsaturated	-7.89566	ELVOC	359.238	192.438	NA	NA	54075	0.0193474	101868	0.027845
423.166	C21H28O9	O9	CHO	21	28	9	0	0	8	-1	0.428571	1.33333	0.172391	424.173	-0.47619	0.212121	Low O unsaturated	-4.16795	ELVOC	344.333	190.639	NA	NA	61459.1	0.0219893	101781	0.0278212
198.056	C12H9NO2	NO2	CHNO	12	9	2	1	0	9	7	0.166667	0.75	-0.0608414	199.063	-0.833333	0.7	Condensed aromatic	1.79628	SVOC	NA	NA	101716	0.0696275	88965	0.0318306	73241.9	0.0200203
437.051	C22H14O10	O10	CHO	22	14	10	0	0	16	6	0.454545	0.636364	0.067841	438.059	0.272727	0.647059	Aromatic	-7.48047	ELVOC	332.981	186.063	NA	NA	NA	NA	101565	0.0277622
337.068	C14H14N2O8	N2O8	CHNO	14	14	8	2	0	9	1	0.571429	1	-0.127126	338.075	-0.571429	0.375	High O unsaturated	-4.00689	ELVOC	NA	NA	NA	NA	57034.3	0.0204062	101545	0.0277568
329.161	C16H26O7	O7	CHO	16	26	7	0	0	4	-3	0.4375	1.625	-0.0999512	330.168	-0.75	0.04	Low O unsaturated	-0.314413	SVOC	322.091	187.001	101524	0.069496	98561.6	0.0352641	68911.6	0.0188366
428.062	C20H15NO10	NO10	CHNO	20	15	10	1	0	14	4	0.5	0.75	-0.286407	429.07	0	0.571429	Aromatic	-6.6001	ELVOC	NA	NA	NA	NA	46302.1	0.0165663	101457	0.0277328
455.156	C21H28O11	O11	CHO	21	28	11	0	0	8	-3	0.52381	1.33333	-0.0959012	456.163	-0.285714	0.16129	High O unsaturated	-6.05917	ELVOC	353.31	191.263	NA	NA	75706.7	0.0270869	101454	0.0277318
200.056	C8H11NO5	NO5	CHNO	8	11	5	1	0	4	-1	0.625	1.375	-0.0289918	201.064	-0.75	0.111111	High O unsaturated	1.41943	SVOC	NA	NA	81344.3	0.0556826	101437	0.036293	91367.9	0.0249749
251.023	C8H12O7S	O7S	CHOS	8	12	7	0	1	3	-4	0.875	1.5	0.0135446	252.03	-0.5	0	Aliphatic	-1.13573	LVOC	NA	NA	NA	NA	NA	NA	101387	0.0277135
316.062	C19H11NO4	NO4	CHNO	19	11	4	1	0	15	11	0.210526	0.578947	0.186989	317.069	-0.421053	0.75	Condensed aromatic	-2.27087	LVOC	NA	NA	42911.5	0.0293742	61133.2	0.0218727	101384	0.0277127
273.056	C18H10O3	O3	CHO	18	10	3	0	0	14	11	0.166667	0.555556	-0.000732451	274.063	-0.222222	0.757576	Condensed aromatic	-0.790331	LVOC	265.275	179.731	73534.3	0.0503364	101380	0.0362726	93783.9	0.0256353
344.114	C18H19NO6	NO6	CHNO	18	19	6	1	0	10	4	0.333333	1.05556	-0.254276	345.121	-0.666667	0.428571	Low O unsaturated	-2.89383	LVOC	NA	NA	62517	0.0427947	90984.2	0.032553	101368	0.0277085
318.041	C18H9NO5	NO5	CHNO	18	9	5	1	0	15	10	0.277778	0.5	0.113665	319.048	-0.222222	0.793103	Condensed aromatic	-2.59845	LVOC	NA	NA	NA	NA	56000.3	0.0200362	101345	0.0277021
210.056	C13H9NO2	NO2	CHNO	13	9	2	1	0	10	8	0.153846	0.692308	-0.029992	211.063	-0.769231	0.727273	Condensed aromatic	1.38685	SVOC	NA	NA	101340	0.0693701	95595.2	0.0342028	83685.3	0.0228749
567.136	C25H28O15	O15	CHO	25	28	15	0	0	12	-3	0.6	1.12	0.130039	568.143	0.08	0.257143	High O unsaturated	-11.7891	ELVOC	370.137	194.103	NA	NA	NA	NA	101271	0.0276819
161.04	C13H6	CH	CH	13	6	0	0	0	11	11	0	0.461538	-0.0226652	162.047	-0.461538	0.846154	Condensed aromatic	3.69249	IVOC	NA	NA	101268	0.069321	44908.9	0.0160678	NA	NA
404.083	C15H19NO12	NO12	CHNO	15	19	12	1	0	7	-5	0.8	1.26667	0.020664	405.091	1.67e-16	0	Aliphatic	-5.9986	ELVOC	NA	NA	NA	NA	NA	NA	101212	0.0276658
418.099	C16H21NO12	NO12	CHNO	16	21	12	1	0	7	-5	0.75	1.3125	-0.092203	419.106	-0.125	0	Aliphatic	-6.29257	ELVOC	NA	NA	NA	NA	NA	NA	101201	0.0276627
463.161	C23H28O10	O10	CHO	23	28	10	0	0	10	0	0.434783	1.21739	0.0153294	464.168	-0.347826	0.277778	Low O unsaturated	-5.99975	ELVOC	351.486	191.828	NA	NA	57775.9	0.0206715	101170	0.0276542
269.034	C8H14O8S	O8S	CHOS	8	14	8	0	1	2	-6	1	1.75	0.012452	270.041	-0.5	0	Aliphatic	-1.96566	LVOC	NA	NA	NA	NA	NA	NA	101065	0.0276255
468.115	C20H23NO12	NO12	CHNO	20	23	12	1	0	10	-2	0.6	1.15	0.124542	469.122	-0.2	0.230769	High O unsaturated	-7.72203	ELVOC	NA	NA	NA	NA	49775.2	0.0178089	101036	0.0276178
420.057	C18H15NO11	NO11	CHNO	18	15	11	1	0	12	1	0.611111	0.833333	-0.0836791	421.064	0.111111	0.478261	High O unsaturated	-6.54371	ELVOC	NA	NA	NA	NA	52083.6	0.0186349	100978	0.0276018
356.114	C19H19NO6	NO6	CHNO	19	19	6	1	0	11	5	0.315789	1	-0.0505456	357.121	-0.631579	0.466667	Low O unsaturated	-3.29364	LVOC	NA	NA	43463.5	0.0297521	76947.8	0.027531	100937	0.0275905
303.062	C14H12N2O6	N2O6	CHNO	14	12	6	2	0	10	4	0.428571	0.857143	0.113013	304.07	-0.714286	0.555556	Aromatic	-2.67287	LVOC	NA	NA	40427	0.0276735	72391.8	0.0259009	100919	0.0275856
214.999	C11H4O5	O5	CHO	11	4	5	0	0	10	5	0.454545	0.363636	-0.0669772	216.006	0.545455	0.882353	Condensed aromatic	0.762326	SVOC	270.311	174.256	49238.4	0.0337051	100904	0.0361022	73468.1	0.0200821
411.036	C20H12O10	O10	CHO	20	12	10	0	0	15	5	0.5	0.6	0.0609436	412.043	0.4	0.666667	Aromatic	-6.86827	ELVOC	328.319	184.316	NA	NA	47824.8	0.0171111	100844	0.0275651
303.03	C18H8O5	O5	CHO	18	8	5	0	0	15	10	0.277778	0.444444	0.28413	304.037	0.111111	0.806452	Condensed aromatic	-2.2323	LVOC	285.441	179.431	53353.4	0.036522	NA	NA	100830	0.0275615
515.119	C25H24O12	O12	CHO	25	24	12	0	0	14	2	0.48	0.96	-0.106189	516.127	0	0.421053	Low O unsaturated	-9.3159	ELVOC	356.828	191.944	NA	NA	NA	NA	100808	0.0275553
399.166	C19H28O9	O9	CHO	19	28	9	0	0	6	-3	0.473684	1.47368	0.0481003	400.173	-0.526316	0.103448	Low O unsaturated	-3.25176	LVOC	341.391	189.721	68805.1	0.0470991	100737	0.0360424	75053.1	0.0205154
380.041	C19H11NO8	NO8	CHNO	19	11	8	1	0	15	7	0.421053	0.578947	-0.310756	381.048	-5.55e-17	0.714286	Condensed aromatic	-4.96169	ELVOC	NA	NA	NA	NA	44886.4	0.0160598	100581	0.0274933
247.076	C17H12O2	O2	CHO	17	12	2	0	0	12	10	0.117647	0.705882	-0.0101183	248.084	-0.470588	0.6875	Condensed aromatic	0.502158	SVOC	246.647	180.007	91426.2	0.0625839	100568	0.0359821	92416.8	0.0252616
407.041	C21H12O9	O9	CHO	21	12	9	0	0	16	7	0.428571	0.571429	-0.0685435	408.048	0.285714	0.69697	Condensed aromatic	-6.38715	ELVOC	324.021	184.345	NA	NA	45780.6	0.0163797	100481	0.0274659
555.099	C23H24O16	O16	CHO	23	24	16	0	0	12	-4	0.695652	1.04348	-0.247433	556.106	0.347826	0.266667	High O unsaturated	-12.7266	ELVOC	367.471	192.205	NA	NA	NA	NA	100455	0.0274589
326.103	C18H17NO5	NO5	CHNO	18	17	5	1	0	11	6	0.277778	0.944444	0.0252987	327.111	-0.666667	0.517241	Aromatic	-2.29765	LVOC	NA	NA	50466.4	0.0345457	89527.5	0.0320318	100435	0.0274534
508.11	C22H23NO13	NO13	CHNO	22	23	13	1	0	12	-1	0.590909	1.04545	-0.0621913	509.117	-0.0909091	0.310345	High O unsaturated	-9.20138	ELVOC	NA	NA	NA	NA	48911	0.0174998	100378	0.0274379
373.108	C23H18O5	O5	CHO	23	18	5	0	0	15	10	0.217391	0.782609	0.296027	374.116	-0.347826	0.609756	Aromatic	-3.63076	ELVOC	310.556	186.305	NA	NA	NA	NA	100296	0.0274152
478.099	C21H21NO12	NO12	CHNO	21	21	12	1	0	12	0	0.571429	1	-0.0380674	479.106	-0.0952381	0.357143	High O unsaturated	-8.17911	ELVOC	NA	NA	NA	NA	NA	NA	100208	0.0273913
197.024	C12H6O3	O3	CHO	12	6	3	0	0	10	7	0.25	0.5	-0.0299455	198.032	0	0.809524	Condensed aromatic	2.10309	SVOC	245.452	175.24	91096.2	0.062358	100199	0.0358501	74660.5	0.020408
347.008	C12H12O10S	O10S	CHOS	12	12	10	0	1	7	-3	0.833333	1	0.0926492	348.015	0.166667	0.166667	High O unsaturated	-5.89972	ELVOC	NA	NA	NA	NA	NA	NA	100143	0.0273737
210.004	C8H5NO6	NO6	CHNO	8	5	6	1	0	7	1	0.75	0.625	0.00190472	211.012	0.25	0.75	Condensed aromatic	0.467197	SVOC	NA	NA	NA	NA	80582	0.0288312	100136	0.0273716
362.073	C13H17NO11	NO11	CHNO	13	17	11	1	0	6	-5	0.846154	1.30769	-0.235312	363.08	-5.55e-17	0	Aliphatic	-4.60312	ELVOC	NA	NA	NA	NA	NA	NA	100120	0.0273672
456.078	C18H19NO13	NO13	CHNO	18	19	13	1	0	10	-3	0.722222	1.05556	-0.19558	457.086	0.111111	0.238095	High O unsaturated	-7.84247	ELVOC	NA	NA	NA	NA	NA	NA	100107	0.0273636
394.057	C20H13NO8	NO8	CHNO	20	13	8	1	0	15	7	0.4	0.65	-0.102143	395.064	-0.1	0.666667	Aromatic	-5.28052	ELVOC	NA	NA	NA	NA	54421.4	0.0194713	99915.3	0.0273113
331.034	C9H16O11S	O11S	CHOS	9	16	11	0	1	2	-9	1.22222	1.77778	0.0593595	332.041	3.33e-16	0	Aliphatic	-5.46781	ELVOC	NA	NA	NA	NA	NA	NA	99891.2	0.0273047
376.083	C21H15NO6	NO6	CHNO	21	15	6	1	0	15	9	0.285714	0.714286	0.187193	377.09	-0.380952	0.647059	Aromatic	-4.2468	ELVOC	NA	NA	NA	NA	61247.3	0.0219135	99867.1	0.0272981
180.981	C4H6O6S	O6S	CHOS	4	6	6	0	1	2	-4	1.5	1.5	-0.0842629	181.989	0	0	Aliphatic	0.339936	SVOC	NA	NA	NA	NA	NA	NA	99834	0.0272891
539.141	C24H28O14	O14	CHO	24	28	14	0	0	11	-3	0.583333	1.16667	0.0550877	540.148	0	0.235294	High O unsaturated	-10.346	ELVOC	366.584	193.42	NA	NA	NA	NA	99765.8	0.0272704
197.013	C5H10O6S	O6S	CHOS	5	10	6	0	1	1	-5	1.2	2	-0.0553264	198.02	-0.8	0	Aliphatic	0.681209	SVOC	NA	NA	NA	NA	NA	NA	99715.4	0.0272567
465.089	C17H22O15	O15	CHO	17	22	15	0	0	7	-8	0.882353	1.29412	0.260811	466.096	0.470588	0	Aliphatic	-10.0474	ELVOC	358.926	188.482	NA	NA	NA	NA	99697.4	0.0272517
276.036	C9H11NO9	NO9	CHNO	9	11	9	1	0	5	-4	1	1.22222	-0.0443783	277.043	0.222222	0	Aliphatic	-1.89713	LVOC	NA	NA	NA	NA	59689.4	0.0213561	99609.7	0.0272278
311.129	C19H20O4	O4	CHO	19	20	4	0	0	10	6	0.210526	1.05263	-0.274806	312.136	-0.631579	0.470588	Low O unsaturated	-0.502683	SVOC	295.798	185.174	NA	NA	75094.1	0.0268677	99592.9	0.0272232
218.082	C12H13NO3	NO3	CHNO	12	13	3	1	0	7	4	0.25	1.08333	-0.0410396	219.09	-1	0.473684	Low O unsaturated	1.29849	SVOC	NA	NA	78498.5	0.0537345	99511.5	0.035604	64129.8	0.0175295
471.13	C24H24O10	O10	CHO	24	24	10	0	0	13	3	0.416667	1	-0.105173	472.137	-0.166667	0.421053	Low O unsaturated	-7.02519	ELVOC	348.488	190.926	NA	NA	69433.5	0.0248425	99281.5	0.0271381
337.166	C18H26O6	O6	CHO	18	26	6	0	0	6	0	0.333333	1.44444	-0.267969	338.173	-0.777778	0.2	Low O unsaturated	-0.462074	SVOC	318.611	187.608	68448.1	0.0468547	91788.7	0.0328409	99148.4	0.0271017
163.061	C6H12O5	O5	CHO	6	12	5	0	0	1	-4	0.833333	2	-0.0288235	164.068	-0.333333	0	Aliphatic	3.77047	IVOC	265.893	175.939	99122.8	0.0678524	60499.4	0.0216459	NA	NA
320.062	C11H15NO10	NO10	CHNO	11	15	10	1	0	5	-5	0.909091	1.36364	-0.0109354	321.07	0	0	Aliphatic	-3.21043	LVOC	NA	NA	NA	NA	54294.9	0.0194261	99066.2	0.0270792
367.01	C18H8O9	O9	CHO	18	8	9	0	0	15	6	0.5	0.444444	0.158715	368.017	0.555556	0.777778	Condensed aromatic	-5.58607	ELVOC	313.944	180.937	NA	NA	NA	NA	99037.1	0.0270713
290.046	C17H9NO4	NO4	CHNO	17	9	4	1	0	14	10	0.235294	0.529412	0.121705	291.053	-0.352941	0.785714	Condensed aromatic	-1.53383	LVOC	NA	NA	48790.6	0.0333986	74470.6	0.0266447	99011.2	0.0270642
383.171	C19H28O8	O8	CHO	19	28	8	0	0	6	-2	0.421053	1.47368	-0.121095	384.178	-0.631579	0.133333	Low O unsaturated	-2.33732	LVOC	335.835	189.391	76199.7	0.0521609	92634.7	0.0331436	99001.9	0.0270616
266.978	C10H4O9	O9	CHO	10	4	9	0	0	9	0	0.9	0.4	-0.114991	267.986	1.4	0.818182	Condensed aromatic	-3.32108	LVOC	307.079	175.098	NA	NA	54500.5	0.0194996	98999	0.0270608
565.156	C26H30O14	O14	CHO	26	30	14	0	0	12	-2	0.538462	1.15385	-0.0237987	566.164	-0.0769231	0.263158	High O unsaturated	-10.873	ELVOC	370.047	194.862	NA	NA	NA	NA	98947.5	0.0270468
545.13	C26H26O13	O13	CHO	26	26	13	0	0	14	1	0.5	1	-0.268743	546.137	0	0.384615	High O unsaturated	-10.4375	ELVOC	363.027	193.312	NA	NA	NA	NA	98939	0.0270444
347.02	C19H8O7	O7	CHO	19	8	7	0	0	16	9	0.368421	0.421053	-0.21872	348.027	0.315789	0.806452	Condensed aromatic	-4.26	ELVOC	302.214	180.565	NA	NA	51507.2	0.0184286	98933.2	0.0270429
402.104	C16H21NO11	NO11	CHNO	16	21	11	1	0	7	-4	0.6875	1.3125	0.12447	403.111	-0.25	0.0526316	High O unsaturated	-5.56288	ELVOC	NA	NA	NA	NA	61260.1	0.0219181	98913.7	0.0270375
268.01	C10H7NO8	NO8	CHNO	10	7	8	1	0	8	0	0.8	0.7	0.0863774	269.017	0.4	0.6	Aromatic	-1.66528	LVOC	NA	NA	NA	NA	72910.1	0.0260863	98809.9	0.0270092
555.136	C24H28O15	O15	CHO	24	28	15	0	0	11	-4	0.625	1.16667	-0.0205355	556.143	0.0833333	0.212121	High O unsaturated	-11.4131	ELVOC	369.446	193.681	NA	NA	NA	NA	98672.6	0.0269716
333.013	C8H14O12S	O12S	CHOS	8	14	12	0	1	2	-10	1.5	1.75	-0.0803271	334.021	0.5	0	Aliphatic	-6.71366	ELVOC	NA	NA	NA	NA	NA	NA	98655.3	0.0269669
453.119	C24H22O9	O9	CHO	24	22	9	0	0	14	5	0.375	0.916667	-0.0313383	454.126	-0.166667	0.487179	Low O unsaturated	-6.44976	ELVOC	341.78	189.866	NA	NA	61380.4	0.0219612	98610.3	0.0269546
476.083	C21H19NO12	NO12	CHNO	21	19	12	1	0	13	1	0.571429	0.904762	-0.0818134	477.091	-5.55e-17	0.428571	High O unsaturated	-8.25431	ELVOC	NA	NA	NA	NA	44294.9	0.0158482	98573.1	0.0269444
348.987	C11H10O11S	O11S	CHOS	11	10	11	0	1	7	-4	1	0.909091	0.247287	349.994	0.545455	0.111111	High O unsaturated	-6.98236	ELVOC	NA	NA	NA	NA	NA	NA	98567.3	0.0269428
399.145	C22H24O7	O7	CHO	22	24	7	0	0	11	4	0.318182	1.09091	0.0671435	400.152	-0.454545	0.405405	Low O unsaturated	-3.57718	ELVOC	330.892	189.066	NA	NA	67600.7	0.0241867	98471.4	0.0269166
455.047	C18H16O14	O14	CHO	18	16	14	0	0	11	-3	0.777778	0.888889	-0.085266	456.054	0.666667	0.363636	High O unsaturated	-9.92947	ELVOC	349.677	186.495	NA	NA	NA	NA	98438.7	0.0269077
223.046	C7H12O8	O8	CHO	7	12	8	0	0	2	-6	1.14286	1.71429	-0.115223	224.053	0.571429	0	Aliphatic	-0.329514	SVOC	303.425	177.391	NA	NA	NA	NA	98358.4	0.0268857
169.087	C9H14O3	O3	CHO	9	14	3	0	0	3	0	0.333333	1.55556	-0.0887117	170.094	-0.888889	0.2	Low O unsaturated	4.82633	IVOC	243.666	177.874	95624.2	0.0654576	98297.1	0.0351695	NA	NA
440.12	C19H23NO11	NO11	CHNO	19	23	11	1	0	9	-2	0.578947	1.21053	-0.10838	441.127	-0.315789	0.2	High O unsaturated	-6.62416	ELVOC	NA	NA	NA	NA	62822.7	0.0224772	98289.8	0.026867
461.13	C19H26O13	O13	CHO	19	26	13	0	0	7	-6	0.684211	1.36842	0.018433	462.137	0	0.04	High O unsaturated	-7.69977	ELVOC	357.122	190.271	54441.4	0.0372667	90469.2	0.0323688	98273.4	0.0268625
349.166	C19H26O6	O6	CHO	19	26	6	0	0	7	1	0.315789	1.36842	-0.327065	350.173	-0.736842	0.25	Low O unsaturated	-0.98277	LVOC	320.647	188.061	59777.8	0.0409196	77108.2	0.0275884	98216.7	0.026847
517.12	C21H26O15	O15	CHO	21	26	15	0	0	9	-6	0.714286	1.2381	-0.237566	518.127	0.190476	0.111111	High O unsaturated	-10.6453	ELVOC	365.408	191.723	NA	NA	71753.6	0.0256726	98201.1	0.0268427
433.041	C19H14O12	O12	CHO	19	14	12	0	0	13	1	0.631579	0.736842	0.0504571	434.049	0.526316	0.538462	Aromatic	-8.25452	ELVOC	339.846	185.516	NA	NA	42933.7	0.0153611	98151.7	0.0268292
407.029	C14H16O12S	O12S	CHOS	14	16	12	0	1	7	-5	0.857143	1.14286	-0.0125298	408.036	0.142857	0	Aliphatic	-8.23368	ELVOC	NA	NA	NA	NA	NA	NA	98149.3	0.0268286
276.073	C10H15NO8	NO8	CHNO	10	15	8	1	0	4	-4	0.8	1.5	0.0666492	277.08	-0.4	0	Aliphatic	-1.36448	LVOC	NA	NA	52020.9	0.0356098	80156	0.0286788	98115.1	0.0268192
370.993	C10H12O13S	O13S	CHOS	10	12	13	0	1	5	-8	1.3	1.2	0.0396234	372	0.8	0	Aliphatic	-8.7271	ELVOC	NA	NA	NA	NA	NA	NA	98086.5	0.0268114
436.125	C20H23NO10	NO10	CHNO	20	23	10	1	0	10	0	0.5	1.15	0.122442	437.132	-0.4	0.285714	High O unsaturated	-6.2993	ELVOC	NA	NA	NA	NA	62441.9	0.0223409	97983.7	0.0267833
355.176	C18H28O7	O7	CHO	18	28	7	0	0	5	-2	0.388889	1.55556	-0.185964	356.183	-0.777778	0.103448	Low O unsaturated	-0.991738	LVOC	327.615	188.568	82663.8	0.0565858	97956.4	0.0350476	67917.8	0.018565
515.141	C22H28O14	O14	CHO	22	28	14	0	0	9	-5	0.636364	1.27273	-0.153259	516.148	0	0.133333	High O unsaturated	-9.59081	ELVOC	364.964	192.544	NA	NA	59328.7	0.0212271	97947	0.0267733
585.146	C25H30O16	O16	CHO	25	30	16	0	0	11	-5	0.64	1.2	-0.163549	586.153	0.08	0.176471	High O unsaturated	-12.5918	ELVOC	374.664	194.964	NA	NA	NA	NA	97889.8	0.0267576
471.151	C21H28O12	O12	CHO	21	28	12	0	0	8	-4	0.571429	1.33333	-0.0227104	472.158	-0.190476	0.133333	High O unsaturated	-7.07655	ELVOC	357.202	191.551	41765.2	0.0285895	73245.1	0.0262062	97878.6	0.0267546
503.156	C25H28O11	O11	CHO	25	28	11	0	0	12	1	0.44	1.12	-0.210273	504.163	-0.24	0.333333	Low O unsaturated	-7.83241	ELVOC	357.581	192.965	NA	NA	NA	NA	97878.2	0.0267545
341.082	C22H14O4	O4	CHO	22	14	4	0	0	16	12	0.181818	0.636364	-0.295384	342.089	-0.272727	0.7	Condensed aromatic	-3.06835	LVOC	293.03	183.651	47246.2	0.0323414	62460.1	0.0223475	97876.7	0.0267541
551.104	C24H24O15	O15	CHO	24	24	15	0	0	13	-2	0.625	1	-0.225547	552.111	0.25	0.333333	High O unsaturated	-11.9679	ELVOC	365.306	192.376	NA	NA	NA	NA	97816.4	0.0267376
343.155	C20H24O5	O5	CHO	20	24	5	0	0	9	4	0.25	1.2	-0.278737	344.162	-0.7	0.371429	Low O unsaturated	-1.11127	LVOC	312.373	187.435	NA	NA	71611.8	0.0256218	97812.9	0.0267366
507.078	C22H20O14	O14	CHO	22	20	14	0	0	13	-1	0.636364	0.909091	-0.27126	508.085	0.363636	0.4	High O unsaturated	-10.7004	ELVOC	356.56	189.833	NA	NA	NA	NA	97747.1	0.0267186
143.05	C10H8O	O	CHO	10	8	1	0	0	7	6	0.1	0.8	-0.0115344	144.058	-0.6	0.684211	Condensed aromatic	4.53611	IVOC	174.545	175.02	97736.3	0.0669033	61165.4	0.0218842	50096.7	0.0136937
455.062	C22H16O11	O11	CHO	22	16	11	0	0	15	4	0.5	0.727273	-0.091526	456.069	0.272727	0.575758	Aromatic	-8.15047	ELVOC	340.472	187.322	NA	NA	NA	NA	97734.7	0.0267152
417.098	C24H18O7	O7	CHO	24	18	7	0	0	16	9	0.291667	0.75	-0.00431553	418.105	-0.166667	0.609756	Aromatic	-5.46965	ELVOC	325.967	187.514	NA	NA	NA	NA	97675.6	0.0266991
513.104	C25H22O12	O12	CHO	25	22	12	0	0	15	3	0.48	0.88	-0.0493078	514.111	0.08	0.473684	Low O unsaturated	-9.5933	ELVOC	354.414	191.219	NA	NA	NA	NA	97618.7	0.0266835
547.109	C25H24O14	O14	CHO	25	24	14	0	0	14	0	0.56	0.96	-0.0927603	548.117	0.16	0.388889	High O unsaturated	-11.2973	ELVOC	363.068	192.515	NA	NA	NA	NA	97410.4	0.0266266
396.072	C20H15NO8	NO8	CHNO	20	15	8	1	0	14	6	0.4	0.75	-0.319891	397.08	-0.2	0.6	Aromatic	-5.20532	ELVOC	NA	NA	NA	NA	76242.5	0.0272786	97244.1	0.0265812
207.103	C12H16O3	O3	CHO	12	16	3	0	0	5	2	0.25	1.33333	-0.0427324	208.11	-0.833333	0.333333	Low O unsaturated	3.49009	IVOC	257.103	180.177	94079.4	0.0644001	97221.5	0.0347846	51834.2	0.0141686
561.125	C26H26O14	O14	CHO	26	26	14	0	0	14	0	0.538462	1	-0.273558	562.132	0.0769231	0.368421	High O unsaturated	-11.4278	ELVOC	365.956	193.594	NA	NA	NA	NA	97098.7	0.0265414
299.071	C20H12O3	O3	CHO	20	12	3	0	0	15	12	0.15	0.6	-0.0568426	300.079	-0.3	0.72973	Condensed aromatic	-1.69649	LVOC	273.028	181.478	51502.1	0.0352547	94190.2	0.0337001	97055.6	0.0265296
455.05	C15H20O14S	O14S	CHOS	15	20	14	0	1	6	-8	0.933333	1.33333	-0.0453796	456.057	0.133333	0	Aliphatic	-10.2225	ELVOC	NA	NA	NA	NA	NA	NA	97035.6	0.0265242
437.124	C24H22O8	O8	CHO	24	22	8	0	0	14	6	0.333333	0.916667	-0.0743496	438.131	-0.25	0.5	Low O unsaturated	-5.65207	ELVOC	336.895	189.503	NA	NA	51203.1	0.0183198	96946.7	0.0264998
378.098	C21H17NO6	NO6	CHNO	21	17	6	1	0	14	8	0.285714	0.809524	0.255225	379.106	-0.47619	0.588235	Aromatic	-4.1716	ELVOC	NA	NA	NA	NA	68870.2	0.0246409	96849.5	0.0264733
276.067	C17H11NO3	NO3	CHNO	17	11	3	1	0	13	10	0.176471	0.647059	0.0539725	277.074	-0.588235	0.724138	Condensed aromatic	-0.810992	LVOC	NA	NA	69174.4	0.0473519	79921.1	0.0285948	96792.9	0.0264578
481.062	C20H18O14	O14	CHO	20	18	14	0	0	12	-2	0.7	0.9	0.0764974	482.07	0.5	0.384615	High O unsaturated	-10.2805	ELVOC	353.064	188.201	NA	NA	NA	NA	96716.4	0.0264369
484.109	C20H23NO13	NO13	CHNO	20	23	13	1	0	10	-3	0.65	1.15	-0.354568	485.117	-0.1	0.2	High O unsaturated	-8.44229	ELVOC	NA	NA	NA	NA	NA	NA	96678.6	0.0264266
439.161	C21H28O10	O10	CHO	21	28	10	0	0	8	-2	0.47619	1.33333	-0.0552189	440.168	-0.380952	0.1875	Low O unsaturated	-5.0881	ELVOC	349.046	190.96	NA	NA	82603.3	0.0295544	96663.7	0.0264225
308.093	C18H15NO4	NO4	CHNO	18	15	4	1	0	12	8	0.222222	0.833333	-0.21341	309.1	-0.666667	0.6	Aromatic	-1.714	LVOC	NA	NA	47053.5	0.0322095	82111.6	0.0293785	96607.1	0.026407
279.072	C10H16O9	O9	CHO	10	16	9	0	0	3	-6	0.9	1.6	-0.0996158	280.079	0.2	0	Aliphatic	-1.65668	LVOC	318.084	181.045	NA	NA	61547.7	0.022021	96571.1	0.0263972
492.115	C22H23NO12	NO12	CHNO	22	23	12	1	0	12	0	0.545455	1.04545	-0.0315983	493.122	-0.181818	0.333333	High O unsaturated	-8.48768	ELVOC	NA	NA	NA	NA	NA	NA	96521.9	0.0263837
468.078	C19H19NO13	NO13	CHNO	19	19	13	1	0	11	-2	0.684211	1	0.0331141	469.086	0.105263	0.304348	High O unsaturated	-8.21637	ELVOC	NA	NA	NA	NA	NA	NA	96521.8	0.0263837
506.094	C22H21NO13	NO13	CHNO	22	21	13	1	0	13	0	0.590909	0.954545	0.0860512	507.101	0	0.37931	High O unsaturated	-9.27658	ELVOC	NA	NA	NA	NA	NA	NA	96520.4	0.0263833
335.008	C11H12O10S	O10S	CHOS	11	12	10	0	1	6	-4	0.909091	1.09091	0.0644761	336.015	0.181818	0	Aliphatic	-5.54565	ELVOC	NA	NA	NA	NA	NA	NA	96296	0.026322
316.01	C14H7NO8	NO8	CHNO	14	7	8	1	0	12	4	0.571429	0.5	0.0424037	317.017	0.285714	0.777778	Condensed aromatic	-3.16909	LVOC	NA	NA	NA	NA	57816.4	0.020686	96289.5	0.0263202
286.093	C12H17NO7	NO7	CHNO	12	17	7	1	0	5	-2	0.583333	1.41667	-0.299902	287.1	-0.666667	0.0666667	High O unsaturated	-1.31337	LVOC	NA	NA	58958.5	0.0403588	93494.4	0.0334511	96268.7	0.0263145
351.093	C13H20O11	O11	CHO	13	20	11	0	0	4	-7	0.846154	1.53846	-0.0112506	352.101	0.153846	0	Aliphatic	-4.34427	ELVOC	336.982	184.695	NA	NA	NA	NA	96244.9	0.026308
363.039	C13H16O10S	O10S	CHOS	13	16	10	0	1	6	-4	0.769231	1.23077	-0.22656	364.046	-0.153846	0	Aliphatic	-5.6667	ELVOC	NA	NA	NA	NA	NA	NA	96192.2	0.0262936
237.092	C16H14O2	O2	CHO	16	14	2	0	0	10	8	0.125	0.875	-0.118098	238.099	-0.625	0.6	Aromatic	1.38326	SVOC	246.542	180.612	80250.7	0.0549339	93197.3	0.0333448	96187.8	0.0262924
162.056	C9H9NO2	NO2	CHNO	9	9	2	1	0	6	4	0.222222	1	-0.0407266	163.063	-1.11111	0.571429	Aromatic	3.01969	IVOC	NA	NA	96133.2	0.065806	82263.4	0.0294328	NA	NA
543.099	C22H24O16	O16	CHO	22	24	16	0	0	11	-5	0.727273	1.09091	-0.147119	544.106	0.363636	0.214286	High O unsaturated	-12.3997	ELVOC	366.936	191.769	NA	NA	NA	NA	96013.9	0.0262449
451.103	C24H20O9	O9	CHO	24	20	9	0	0	15	6	0.375	0.833333	-0.0826861	452.111	-0.0833333	0.538462	Aromatic	-6.72716	ELVOC	339.221	189.097	NA	NA	NA	NA	96008	0.0262433
389.03	C21H10O8	O8	CHO	21	10	8	0	0	17	9	0.380952	0.47619	-0.395213	390.037	0.285714	0.764706	Condensed aromatic	-5.80061	ELVOC	314.382	182.852	NA	NA	NA	NA	95913.1	0.0262173
351.039	C12H16O10S	O10S	CHOS	12	16	10	0	1	5	-5	0.833333	1.33333	-0.207527	352.046	-0.166667	0	Aliphatic	-5.29692	ELVOC	NA	NA	NA	NA	NA	NA	95882.1	0.0262089
399.087	C24H16O6	O6	CHO	24	16	6	0	0	17	11	0.25	0.666667	0.0522442	400.095	-0.166667	0.666667	Aromatic	-5.07635	ELVOC	316.409	186.197	NA	NA	NA	NA	95850.9	0.0262003
367.176	C19H28O7	O7	CHO	19	28	7	0	0	6	-1	0.368421	1.47368	-0.0898751	368.183	-0.736842	0.16129	Low O unsaturated	-1.486	LVOC	329.536	189.039	NA	NA	95841.7	0.034291	81253.6	0.0222102
577.156	C27H30O14	O14	CHO	27	30	14	0	0	13	-1	0.518519	1.11111	-0.204624	578.163	-0.0740741	0.3	High O unsaturated	-11.2915	ELVOC	370.806	195.263	NA	NA	NA	NA	95778.2	0.0261804
428.12	C18H23NO11	NO11	CHNO	18	23	11	1	0	8	-3	0.611111	1.27778	0.200178	429.127	-0.333333	0.130435	High O unsaturated	-6.24291	ELVOC	NA	NA	NA	NA	NA	NA	95764.4	0.0261767
289.129	C13H22O7	O7	CHO	13	22	7	0	0	3	-4	0.538462	1.69231	0.0105489	290.137	-0.615385	0	Aliphatic	0.453046	SVOC	312.775	184.206	95752.6	0.0655454	65384.1	0.0233936	58610.6	0.0160209
325.166	C17H26O6	O6	CHO	17	26	6	0	0	5	-1	0.352941	1.52941	0.101333	326.173	-0.823529	0.142857	Low O unsaturated	0.0496564	SVOC	316.457	187.136	83498.2	0.0571569	95642.3	0.0342196	72729.2	0.0198801
261.999	C11H5NO7	NO7	CHNO	11	5	7	1	0	10	3	0.636364	0.454545	-0.0133588	263.007	0.363636	0.846154	Condensed aromatic	-1.38431	LVOC	NA	NA	NA	NA	77451.3	0.0277111	95592.4	0.0261297
374.124	C19H21NO7	NO7	CHNO	19	21	7	1	0	10	3	0.368421	1.10526	-0.297762	375.132	-0.631579	0.37931	Low O unsaturated	-3.89724	ELVOC	NA	NA	NA	NA	80580	0.0288305	95568.6	0.0261232
353.073	C12H18O12	O12	CHO	12	18	12	0	0	4	-8	1	1.5	0.0379525	354.08	0.5	0	Aliphatic	-5.66127	ELVOC	339.431	183.679	NA	NA	NA	NA	95463.9	0.0260945
569.115	C24H26O16	O16	CHO	24	26	16	0	0	12	-4	0.666667	1.08333	0.000263567	570.122	0.25	0.25	High O unsaturated	-12.791	ELVOC	370.133	193.297	NA	NA	NA	NA	95444.9	0.0260893
408.073	C21H15NO8	NO8	CHNO	21	15	8	1	0	15	7	0.380952	0.714286	0.151444	409.08	-0.190476	0.625	Aromatic	-5.60071	ELVOC	NA	NA	NA	NA	51121.5	0.0182906	95340.3	0.0260608
483.13	C25H24O10	O10	CHO	25	24	10	0	0	14	4	0.4	0.96	-0.147372	484.137	-0.16	0.45	Low O unsaturated	-7.50459	ELVOC	349.447	191.31	NA	NA	NA	NA	95311.1	0.0260528
401.003	C11H14O14S	O14S	CHOS	11	14	14	0	1	5	-9	1.27273	1.27273	0.147006	402.01	0.727273	0	Aliphatic	-9.89046	ELVOC	NA	NA	NA	NA	NA	NA	95257.3	0.0260381
474.089	C18H21NO14	NO14	CHNO	18	21	14	1	0	9	-5	0.777778	1.16667	-0.117383	475.096	0.111111	0.1	High O unsaturated	-8.49978	ELVOC	NA	NA	NA	NA	NA	NA	95172.4	0.0260149
405.155	C21H26O8	O8	CHO	21	26	8	0	0	9	1	0.380952	1.2381	-0.157594	406.163	-0.47619	0.294118	Low O unsaturated	-3.58141	ELVOC	337.287	189.681	51118.3	0.0349919	74717.7	0.0267331	95131.1	0.0260036
358.114	C15H21NO9	NO9	CHNO	15	21	9	1	0	6	-3	0.6	1.4	-0.33076	359.122	-0.533333	0.0526316	High O unsaturated	-3.74038	ELVOC	NA	NA	52272.6	0.0357821	61470.8	0.0219935	95096.6	0.0259941
275.008	C6H12O10S	O10S	CHOS	6	12	10	0	1	1	-9	1.66667	2	-0.0219994	276.015	0.333333	0	Aliphatic	-4.11421	ELVOC	NA	NA	NA	NA	NA	NA	95073.5	0.0259878
452.12	C20H23NO11	NO11	CHNO	20	23	11	1	0	10	-1	0.55	1.15	-0.126626	453.127	-0.3	0.259259	High O unsaturated	-7.00751	ELVOC	NA	NA	NA	NA	53359.5	0.0190914	95006.4	0.0259695
355.061	C22H12O5	O5	CHO	22	12	5	0	0	17	12	0.227273	0.545455	-0.168985	356.068	-0.0909091	0.74359	Condensed aromatic	-3.89599	ELVOC	298.909	183.083	NA	NA	54879.1	0.0196351	94982	0.0259628
236.035	C14H7NO3	NO3	CHNO	14	7	3	1	0	12	9	0.214286	0.5	-0.0891816	237.043	-0.428571	0.826087	Condensed aromatic	0.261662	SVOC	NA	NA	70700.2	0.0483964	80422.5	0.0287742	94943.2	0.0259522
227.129	C12H20O4	O4	CHO	12	20	4	0	0	3	-1	0.333333	1.66667	-0.060098	228.136	-1	0.1	Low O unsaturated	3.34093	IVOC	276.548	181.972	94914.4	0.0649716	84882.3	0.0303698	46111.5	0.0126043
504.115	C23H23NO12	NO12	CHNO	23	23	12	1	0	13	1	0.521739	1	-0.141734	505.122	-0.173913	0.375	High O unsaturated	-8.87317	ELVOC	NA	NA	NA	NA	40273	0.0144092	94884.9	0.0259363
371.15	C21H24O6	O6	CHO	21	24	6	0	0	10	4	0.285714	1.14286	0.160178	372.157	-0.571429	0.388889	Low O unsaturated	-2.32447	LVOC	322.499	188.266	NA	NA	75825.7	0.0271295	94882.4	0.0259356
254.082	C15H13NO3	NO3	CHNO	15	13	3	1	0	10	7	0.2	0.866667	-0.0531324	255.09	-0.8	0.6	Aromatic	0.080268	SVOC	NA	NA	79798.9	0.0546247	94806.9	0.0339207	85555.9	0.0233863
557.115	C23H26O16	O16	CHO	23	26	16	0	0	11	-5	0.695652	1.13043	-0.13525	558.122	0.26087	0.2	High O unsaturated	-12.4492	ELVOC	369.547	192.866	NA	NA	NA	NA	94748.2	0.0258989
424.052	C17H15NO12	NO12	CHNO	17	15	12	1	0	11	-1	0.705882	0.882353	-0.144322	425.059	0.235294	0.4	High O unsaturated	-6.89044	ELVOC	NA	NA	NA	NA	NA	NA	94707.7	0.0258878
363.015	C19H8O8	O8	CHO	19	8	8	0	0	16	8	0.421053	0.421053	0.141317	364.022	0.421053	0.8	Condensed aromatic	-5.11132	ELVOC	308.513	180.934	NA	NA	41554.2	0.0148676	94622.6	0.0258646
464.12	C21H23NO11	NO11	CHNO	21	23	11	1	0	11	0	0.52381	1.09524	0.0692709	465.127	-0.285714	0.310345	High O unsaturated	-7.39277	ELVOC	NA	NA	NA	NA	57671.7	0.0206342	94579.8	0.0258529
497.109	C25H22O11	O11	CHO	25	22	11	0	0	15	4	0.44	0.88	0.171994	498.116	0	0.487179	Low O unsaturated	-8.66461	ELVOC	350.891	190.909	NA	NA	NA	NA	94555.7	0.0258463
232.976	C7H6O7S	O7S	CHOS	7	6	7	0	1	5	-2	1	0.857143	-0.0377721	233.983	0.285714	0.2	High O unsaturated	-1.69996	LVOC	NA	NA	NA	NA	NA	NA	94553.3	0.0258456
289.145	C17H22O4	O4	CHO	17	22	4	0	0	7	3	0.235294	1.29412	-0.0504938	290.152	-0.823529	0.333333	Low O unsaturated	0.908469	SVOC	292.988	185.051	NA	NA	94540.8	0.0338255	83013.8	0.0226914
432.078	C16H19NO13	NO13	CHNO	16	19	13	1	0	8	-5	0.8125	1.1875	-0.167678	433.086	0.125	0.0588235	High O unsaturated	-7.10295	ELVOC	NA	NA	NA	NA	NA	NA	94519.1	0.0258363
[truncated: 2,481 more rows]

## Sheet: DS2_Formula assignments_ESI
Measured mass	Neutral formula	Class	Group	C	H	O	N	S	DBE	DBEO	O/C	H/C	Formula error (ppm)	Neutral mass	OSc	AI_mod	AImod_class	log10C0	Volatility class	Tgdry	prop.err.Tgdry	BBAug09(DT)_abd	BBAug09DT_n_abd	BBAug0910(NT)_abd	BBAug0910NT_n_abd	BBAug1011_abd	BBAug1011_n_abd	BBAug1314_abd	BBAug1314_n_abd
203.056	C8H12O6	O6	CHO	8	12	6	0	0	3	-3	0.75	1.5	-0.0446654	204.063	0	0	Aliphatic	1.99298	SVOC	285.649	177.513	849936896	0.841651	1029245664	1.18726	2372996160	2.34667	654773664	0.517632
215.056	C9H12O6	O6	CHO	9	12	6	0	0	4	-2	0.666667	1.33333	-0.0291393	216.063	0	0.166667	High O unsaturated	1.66377	SVOC	288.119	178.101	702621248	0.695771	931212256	1.07417	1698771264	1.67993	464727936	0.367391
191.02	C6H8O7	O7	CHO	6	8	7	0	0	3	-4	1.16667	1.33333	-0.00791598	192.027	1	0	Aliphatic	0.61088	SVOC	292.479	174.827	382849312	0.379117	292477592	0.33738	206576060	0.204284	1184423072	0.936348
201.04	C8H10O6	O6	CHO	8	10	6	0	0	4	-2	0.75	1.25	-0.0867527	202.048	0.25	0.2	High O unsaturated	1.71558	SVOC	285.081	176.675	560265888	0.554804	709559232	0.818493	1075381408	1.06345	517146240	0.408831
247.046	C9H12O8	O8	CHO	9	12	8	0	0	4	-4	0.888889	1.33333	-0.0875698	248.053	0.444444	0	Aliphatic	-0.714545	LVOC	306.931	178.663	575364416	0.569755	566711456	0.653715	804349952	0.795427	435378640	0.344189
245.067	C10H14O7	O7	CHO	10	14	7	0	0	4	-3	0.7	1.4	0.0203114	246.074	0	0.0769231	High O unsaturated	0.471891	SVOC	301.236	179.766	490822320	0.486037	659903264	0.761214	762668448	0.754208	439572512	0.347505
231.051	C9H12O7	O7	CHO	9	12	7	0	0	4	-3	0.777778	1.33333	-0.0563612	232.058	0.222222	0.0909091	High O unsaturated	0.508726	SVOC	298.199	178.392	558319328	0.552876	657016288	0.757883	759648832	0.751222	504449616	0.398794
209.009	C9H6O6	O6	CHO	9	6	6	0	0	7	1	0.666667	0.666667	-0.068266	210.016	0.666667	0.666667	Aromatic	0.831566	SVOC	284.194	175.13	700126560	0.693301	620698880	0.71599	588980304	0.582446	576528464	0.455776
356.172	C17H27NO7	NO7	CHNO	17	27	7	1	0	5	-2	0.411765	1.58824	0.0857237	357.179	-1.05882	0.04	Low O unsaturated	-2.88072	LVOC	NA	NA	446328736	0.441977	389705520	0.449534	698255616	0.690509	129267752	0.102193
229.072	C10H14O6	O6	CHO	10	14	6	0	0	4	-2	0.6	1.4	-0.0757468	230.079	-0.2	0.142857	High O unsaturated	1.57513	SVOC	291.552	179.463	373769088	0.370125	525419408	0.606083	665669344	0.658285	366299088	0.289578
189.04	C7H10O6	O6	CHO	7	10	6	0	0	3	-3	0.857143	1.42857	-0.0514442	190.048	0.285714	0	Aliphatic	1.99948	SVOC	282.808	176.08	442157088	0.437846	563007888	0.649443	645320800	0.638162	555012960	0.438766
175.025	C6H8O6	O6	CHO	6	8	6	0	0	3	-3	1	1.33333	-0.033246	176.032	0.666667	0	Aliphatic	1.94933	SVOC	280.875	174.577	467502224	0.462945	460360688	0.531037	572492304	0.566141	642944192	0.508281
187.061	C8H12O5	O5	CHO	8	12	5	0	0	3	-2	0.625	1.5	-0.0552515	188.068	-0.25	0.0909091	High O unsaturated	3.12371	IVOC	273.204	177.214	329694960	0.326481	477415488	0.55071	634439392	0.627401	356829680	0.282092
233.03	C8H10O8	O8	CHO	8	10	8	0	0	4	-4	1	1.25	-0.0118876	234.038	0.75	0	Aliphatic	-0.772474	LVOC	304.719	177.214	446646800	0.442292	357386272	0.412253	378492232	0.374293	634342560	0.501481
223.025	C10H8O6	O6	CHO	10	8	6	0	0	7	1	0.6	0.8	-0.0337407	224.032	0.4	0.571429	Aromatic	0.742926	SVOC	287.109	176.74	444282960	0.439952	396835568	0.457759	398934944	0.394509	611270400	0.483241
161.009	C5H6O6	O6	CHO	5	6	6	0	0	3	-3	1.2	1.2	-0.00761527	162.016	1.2	0	Aliphatic	1.82707	SVOC	280.675	172.996	352469136	0.349033	323142800	0.372753	226820888	0.224305	608453728	0.481014
259.046	C10H12O8	O8	CHO	10	12	8	0	0	5	-3	0.8	1.2	0.101372	260.053	0.4	0.166667	High O unsaturated	-0.978941	LVOC	308.401	179.24	482700320	0.477994	471031472	0.543346	573798032	0.567432	561210464	0.443666
181.014	C8H6O5	O5	CHO	8	6	5	0	0	6	1	0.625	0.75	-0.0175702	182.022	0.5	0.636364	Aromatic	2.29151	SVOC	271.043	174.348	390504960	0.386698	341027456	0.393383	353347776	0.349428	573615040	0.453472
217.035	C8H10O7	O7	CHO	8	10	7	0	0	4	-3	0.875	1.25	-0.0579973	218.043	0.5	0.111111	High O unsaturated	0.504286	SVOC	295.604	176.954	459483936	0.455004	478097440	0.551496	557266512	0.551084	530920400	0.41972
165.019	C8H6O4	O4	CHO	8	6	4	0	0	6	2	0.5	0.75	-0.0520567	166.027	0.25	0.666667	Aromatic	3.32153	IVOC	255.811	174.019	449074048	0.444696	392779920	0.453081	456283856	0.451222	546855072	0.432317
187.025	C7H8O6	O6	CHO	7	8	6	0	0	4	-2	0.857143	1.14286	-0.0741563	188.032	0.571429	0.25	High O unsaturated	1.72208	SVOC	282.756	175.176	383565520	0.379826	437504000	0.504671	520930992	0.515152	410438096	0.324473
217.072	C9H14O6	O6	CHO	9	14	6	0	0	3	-3	0.666667	1.55556	-0.0783396	218.079	-0.222222	0	Aliphatic	1.94117	SVOC	288.992	178.885	342043440	0.338709	472592432	0.545146	513750656	0.508051	390018016	0.308329
261.062	C10H14O8	O8	CHO	10	14	8	0	0	4	-4	0.8	1.4	0.0134243	262.069	0.2	0	Aliphatic	-0.701541	LVOC	309.625	180.047	421883584	0.417771	434200736	0.500861	510753056	0.505087	380986992	0.30119
207.03	C10H8O5	O5	CHO	10	8	5	0	0	7	2	0.5	0.8	-0.0596891	208.037	0.2	0.6	Aromatic	1.76193	SVOC	275.655	176.409	286003040	0.283215	260773728	0.300808	278534656	0.275445	502864528	0.39754
243.051	C10H12O7	O7	CHO	10	12	7	0	0	5	-2	0.7	1.2	0.0300662	244.058	0.2	0.230769	High O unsaturated	0.194491	SVOC	300.012	178.957	358307872	0.354815	407720320	0.470315	499213072	0.493675	480597616	0.379937
225.004	C9H6O7	O7	CHO	9	6	7	0	0	7	0	0.777778	0.666667	-0.0690583	226.011	0.888889	0.636364	Aromatic	-0.323474	SVOC	294.274	175.426	476396592	0.471752	401686016	0.463354	286082944	0.282909	392774160	0.310508
275.041	C10H12O9	O9	CHO	10	12	9	0	0	5	-4	0.9	1.2	-0.00330725	276.048	0.6	0.0909091	High O unsaturated	-2.21148	LVOC	315.8	179.504	368804944	0.365209	299725584	0.34574	325553800	0.321942	476150192	0.376421
301.057	C12H14O9	O9	CHO	12	14	9	0	0	6	-3	0.75	1.16667	0.199355	302.064	0.333333	0.2	High O unsaturated	-2.48399	LVOC	319.652	181.435	352567936	0.349131	317961392	0.366776	379965056	0.37575	454409488	0.359234
273.062	C11H14O8	O8	CHO	11	14	8	0	0	5	-3	0.727273	1.27273	-0.0549075	274.069	0.181818	0.142857	High O unsaturated	-1.00377	LVOC	311.272	180.615	403275984	0.399344	407859152	0.470475	452561664	0.447541	428963392	0.339118
245.03	C9H10O8	O8	CHO	9	10	8	0	0	5	-3	0.888889	1.11111	0.00953758	246.038	0.666667	0.2	High O unsaturated	-0.991945	LVOC	305.899	177.796	392125088	0.388302	347951888	0.401371	393766288	0.389398	449665056	0.355483
229.035	C9H10O7	O7	CHO	9	10	7	0	0	5	-2	0.777778	1.11111	-0.0232097	230.043	0.444444	0.272727	High O unsaturated	0.231326	SVOC	297.167	177.524	323961728	0.320803	333005696	0.38413	395792080	0.391401	449529808	0.355377
287.077	C12H16O8	O8	CHO	12	16	8	0	0	5	-3	0.666667	1.33333	0.105281	288.085	0	0.125	High O unsaturated	-1.06075	LVOC	314.362	181.932	339451296	0.336142	388992176	0.448711	442476624	0.437568	353080336	0.279128
289.057	C11H14O9	O9	CHO	11	14	9	0	0	5	-4	0.818182	1.27273	0.169306	290.064	0.363636	0.0769231	High O unsaturated	-2.19159	LVOC	318.398	180.889	354394720	0.35094	325161424	0.375081	372485424	0.368353	440506704	0.348243
173.046	C7H10O5	O5	CHO	7	10	5	0	0	3	-2	0.714286	1.42857	-0.0758206	174.053	0	0.111111	High O unsaturated	3.19473	IVOC	269.768	175.795	266336952	0.26374	386498992	0.445835	419200976	0.41455	371950192	0.294046
271.046	C11H12O8	O8	CHO	11	12	8	0	0	6	-2	0.727273	1.09091	-0.0789766	272.053	0.363636	0.285714	High O unsaturated	-1.28117	LVOC	309.731	179.782	299466080	0.296547	260926648	0.300985	302614424	0.299257	410088208	0.324196
287.041	C11H12O9	O9	CHO	11	12	9	0	0	6	-3	0.818182	1.09091	-0.029595	288.048	0.545455	0.230769	High O unsaturated	-2.46899	LVOC	316.856	180.057	331193728	0.327965	265653400	0.306437	289122360	0.285915	407475184	0.32213
203.02	C7H8O7	O7	CHO	7	8	7	0	0	4	-3	1	1.14286	-0.0425686	204.027	0.857143	0.142857	High O unsaturated	0.449726	SVOC	293.781	175.441	327352800	0.324161	293210784	0.338225	313920560	0.310438	404360592	0.319668
251.02	C11H8O7	O7	CHO	11	8	7	0	0	8	1	0.636364	0.727273	0.0840812	252.027	0.545455	0.6	Aromatic	-0.708941	LVOC	297.598	177.519	372597280	0.368965	327243728	0.377483	311127240	0.307676	401825056	0.317664
239.02	C10H8O7	O7	CHO	10	8	7	0	0	7	0	0.7	0.8	-0.0489921	240.027	0.6	0.538462	Aromatic	-0.360309	SVOC	296.793	177.047	312038080	0.308996	248532480	0.286688	237329880	0.234697	400511696	0.316625
205.035	C7H10O7	O7	CHO	7	10	7	0	0	3	-4	1	1.42857	-0.0320665	206.043	0.571429	0	Aliphatic	0.727126	SVOC	293.832	176.344	262146248	0.259591	241832264	0.278959	239702864	0.237044	397218880	0.314022
285.062	C12H14O8	O8	CHO	12	14	8	0	0	6	-2	0.666667	1.16667	0.139119	286.069	0.166667	0.25	High O unsaturated	-1.33815	LVOC	312.776	181.152	285841632	0.283055	275875776	0.318229	332768128	0.329076	393056000	0.310731
193.035	C6H10O7	O7	CHO	6	10	7	0	0	2	-5	1.16667	1.66667	-0.034943	194.043	0.666667	0	Aliphatic	0.88828	SVOC	291.787	175.688	35871236	0.0355215	36934543	0.0426048	1.33005e+07	0.0131529	385607104	0.304842
317.051	C12H14O10	O10	CHO	12	14	10	0	0	6	-4	0.833333	1.16667	-0.0550686	318.059	0.5	0.142857	High O unsaturated	-3.68338	ELVOC	325.802	181.702	318894928	0.315786	246409952	0.28424	270926272	0.267921	367785024	0.290753
237.04	C11H10O6	O6	CHO	11	10	6	0	0	7	1	0.545455	0.909091	-0.00123297	238.048	0.181818	0.5	High O unsaturated	0.623961	SVOC	290.503	178.245	204754944	0.202759	173558832	0.200204	211639072	0.209291	365383904	0.288855
303.072	C12H16O9	O9	CHO	12	16	9	0	0	5	-4	0.75	1.33333	0.169515	304.079	0.166667	0.0666667	High O unsaturated	-2.20659	LVOC	321.238	182.214	323995744	0.320837	326613792	0.376757	362665104	0.358642	337626032	0.266911
231.087	C10H16O6	O6	CHO	10	16	6	0	0	3	-3	0.6	1.6	0.0182176	232.095	-0.4	0	Aliphatic	1.85253	SVOC	292.612	180.202	212682472	0.210609	300172784	0.346256	362566208	0.358544	284314208	0.224765
257.067	C11H14O7	O7	CHO	11	14	7	0	0	5	-2	0.636364	1.27273	0.0377659	258.074	0	0.2	High O unsaturated	0.123259	SVOC	303.193	180.323	268986776	0.266364	299326688	0.34528	355562512	0.351618	356606592	0.281916
305.051	C11H14O10	O10	CHO	11	14	10	0	0	5	-5	0.909091	1.27273	0.174753	306.059	0.545455	0	Aliphatic	-3.43153	LVOC	324.772	181.146	263573040	0.261003	201703832	0.23267	218487464	0.216064	352438864	0.278621
265.035	C12H10O7	O7	CHO	12	10	7	0	0	8	1	0.583333	0.833333	-0.0878848	266.043	0.333333	0.529412	Aromatic	-0.809137	LVOC	300.984	179.039	276526144	0.27383	224093416	0.258497	231177856	0.228613	349661936	0.276426
195.03	C9H8O5	O5	CHO	9	8	5	0	0	6	1	0.555556	0.888889	-0.00553528	196.037	0.222222	0.538462	Aromatic	2.18115	SVOC	273.901	175.935	144564888	0.143156	110455840	0.127413	158002144	0.156249	348122736	0.275209
259.082	C11H16O7	O7	CHO	11	16	7	0	0	4	-3	0.636364	1.45455	0.0460962	260.09	-0.181818	0.0666667	High O unsaturated	0.400659	SVOC	304.528	181.082	255618096	0.253126	332226240	0.383231	346388112	0.342545	262431856	0.207466
211.025	C9H8O6	O6	CHO	9	8	6	0	0	6	0	0.666667	0.888889	-0.0208773	212.032	0.444444	0.5	High O unsaturated	1.10897	SVOC	285.823	176.252	157948768	0.156409	114958948	0.132608	156837468	0.155098	343549376	0.271594
253.035	C11H10O7	O7	CHO	11	10	7	0	0	7	0	0.636364	0.909091	0.0805163	254.043	0.363636	0.466667	High O unsaturated	-0.431541	SVOC	299.829	178.562	201614480	0.199649	160913784	0.185618	187592496	0.185511	338255584	0.267409
303.036	C11H12O10	O10	CHO	11	12	10	0	0	6	-4	0.909091	1.09091	0.183696	304.043	0.727273	0.166667	High O unsaturated	-3.70893	ELVOC	323.231	180.316	272353344	0.269698	190036744	0.219212	219927672	0.217488	337494928	0.266807
329.051	C13H14O10	O10	CHO	13	14	10	0	0	7	-3	0.769231	1.07692	0.214963	330.059	0.461538	0.25	High O unsaturated	-3.96758	ELVOC	326.75	182.229	NA	NA	200545752	0.231334	239086400	0.236434	337125248	0.266515
313.057	C13H14O9	O9	CHO	13	14	9	0	0	7	-2	0.692308	1.07692	0.083822	314.064	0.307692	0.294118	High O unsaturated	-2.80651	LVOC	320.805	181.954	237627048	0.23531	190438616	0.219675	232060008	0.229486	336061952	0.265674
315.072	C13H16O9	O9	CHO	13	16	9	0	0	6	-3	0.692308	1.23077	-0.125105	316.079	0.153846	0.176471	High O unsaturated	-2.52911	LVOC	322.622	182.753	296217856	0.29333	283239392	0.326723	315226912	0.31173	331345184	0.261946
301.093	C13H18O8	O8	CHO	13	18	8	0	0	5	-3	0.615385	1.38462	0.121423	302.1	-0.153846	0.111111	High O unsaturated	-1.1453	LVOC	317.579	183.197	250987160	0.24854	293582024	0.338654	331206288	0.327532	247971128	0.196034
281.03	C12H10O8	O8	CHO	12	10	8	0	0	8	0	0.666667	0.833333	0.0846059	282.038	0.5	0.5	High O unsaturated	-1.89295	LVOC	308.779	179.345	272601088	0.269943	210599576	0.242931	208837224	0.20652	330532240	0.261303
241.002	C6H10O8S	O8S	CHOS	6	10	8	0	1	2	-6	1.33333	1.66667	-0.122746	242.01	-2.22e-16	0	Aliphatic	-1.97601	LVOC	NA	NA	126113136	0.124884	115691460	0.133453	180641920	0.178638	329077920	0.260153
271.082	C12H16O7	O7	CHO	12	16	7	0	0	5	-2	0.583333	1.33333	0.0671199	272.09	-0.166667	0.176471	High O unsaturated	0.0230628	SVOC	306.567	181.631	233405816	0.23113	274820288	0.317012	328042400	0.324403	289895208	0.229177
299.041	C12H12O9	O9	CHO	12	12	9	0	0	7	-2	0.75	1	0.073513	300.048	0.5	0.333333	High O unsaturated	-2.76139	LVOC	317.821	180.58	221756616	0.219595	171290216	0.197587	190826632	0.18871	325826208	0.257582
257.03	C10H10O8	O8	CHO	10	10	8	0	0	6	-2	0.8	1	-0.0825773	258.038	0.6	0.333333	High O unsaturated	-1.25634	LVOC	306.953	178.343	244279688	0.241898	198401240	0.22886	218199040	0.215778	325018224	0.256944
299.077	C13H16O8	O8	CHO	13	16	8	0	0	6	-2	0.615385	1.23077	0.193995	300.085	0	0.222222	High O unsaturated	-1.4227	LVOC	315.976	182.462	241024232	0.238674	246525568	0.284373	301189280	0.297848	324515520	0.256546
283.046	C12H12O8	O8	CHO	12	12	8	0	0	7	-1	0.666667	1	0.185036	284.053	0.333333	0.375	High O unsaturated	-1.61555	LVOC	310.945	180.296	190747744	0.188888	156861192	0.180943	190226136	0.188116	323062320	0.255397
331.067	C13H16O10	O10	CHO	13	16	10	0	0	6	-4	0.769231	1.23077	-0.0787534	332.074	0.307692	0.125	High O unsaturated	-3.69018	ELVOC	328.568	183.027	318775488	0.315668	274341128	0.316459	302527064	0.299171	320874192	0.253668
295.046	C13H12O8	O8	CHO	13	12	8	0	0	8	0	0.615385	0.923077	0.0298327	296.053	0.307692	0.444444	High O unsaturated	-1.9775	LVOC	312.061	180.783	231715280	0.229456	180265568	0.20794	194362664	0.192206	320580176	0.253435
233.067	C9H14O7	O7	CHO	9	14	7	0	0	3	-4	0.777778	1.55556	-0.0375877	234.074	0	0	Aliphatic	0.786126	SVOC	299.072	179.174	233916944	0.231636	320096304	0.369238	298734944	0.295421	230968496	0.182593
255.018	C7H12O8S	O8S	CHOS	7	12	8	0	1	2	-6	1.14286	1.71429	-0.0622835	256.025	-0.285714	0	Aliphatic	-1.95493	LVOC	NA	NA	115173128	0.11405	113859356	0.131339	314143120	0.310658	97443992	0.0770345
343.067	C14H16O10	O10	CHO	14	16	10	0	0	7	-3	0.714286	1.14286	0.059328	344.074	0.285714	0.222222	High O unsaturated	-4.00267	ELVOC	329.659	183.547	257050504	0.254545	212092560	0.244654	254696568	0.251871	310136880	0.245179
279.051	C13H12O7	O7	CHO	13	12	7	0	0	8	1	0.538462	0.923077	-0.103674	280.058	0.153846	0.473684	High O unsaturated	-0.933954	LVOC	304.527	180.469	194546664	0.19265	161970816	0.186837	181900864	0.179883	309821792	0.24493
267.015	C11H8O8	O8	CHO	11	8	8	0	0	8	0	0.727273	0.727273	0.189558	268.022	0.727273	0.571429	Aromatic	-1.83597	LVOC	305.677	177.816	308377376	0.305371	251750216	0.2904	210338136	0.208005	305884512	0.241818
173.009	C6H6O6	O6	CHO	6	6	6	0	0	4	-2	1	1	-0.036284	174.016	1	0.333333	High O unsaturated	1.67193	SVOC	281.767	173.59	213547664	0.211466	214892936	0.247884	208666528	0.206352	305168944	0.241252
223.061	C11H12O5	O5	CHO	11	12	5	0	0	6	1	0.454545	1.09091	-0.105997	224.068	-0.181818	0.411765	Low O unsaturated	1.87193	SVOC	281.296	178.833	190593112	0.188735	153107208	0.176613	193151928	0.191009	302333696	0.23901
325.057	C14H14O9	O9	CHO	14	14	9	0	0	8	-1	0.642857	1	0.198376	326.064	0.285714	0.368421	High O unsaturated	-3.15523	LVOC	321.873	182.447	193400104	0.191515	150013832	0.173044	175709512	0.17376	301338912	0.238224
275.077	C11H16O8	O8	CHO	11	16	8	0	0	4	-4	0.727273	1.45455	0.0135813	276.085	0	0	Aliphatic	-0.726369	LVOC	312.607	181.374	259032144	0.256507	293172000	0.338181	301239952	0.297898	253196728	0.200165
185.046	C8H10O5	O5	CHO	8	10	5	0	0	4	-1	0.625	1.25	-0.072844	186.053	0	0.272727	High O unsaturated	2.84631	IVOC	272.635	176.375	155530608	0.154014	179879544	0.207495	301055232	0.297715	221986840	0.175492
273.025	C10H10O9	O9	CHO	10	10	9	0	0	6	-3	0.9	1	0.0934007	274.033	0.8	0.272727	High O unsaturated	-2.48888	LVOC	314.353	178.609	230588600	0.228341	167079864	0.19273	188517096	0.186426	299726392	0.236949
147.03	C5H8O5	O5	CHO	5	8	5	0	0	2	-3	1	1.6	-0.0496401	148.037	0.4	0	Aliphatic	3.44893	IVOC	264.115	173.68	92669372	0.0917659	118547968	0.136748	93701514	0.092662	297960680	0.235553
239.023	C7H12O7S	O7S	CHOS	7	12	7	0	1	2	-5	1	1.71429	0.0188824	240.03	-0.571429	0	Aliphatic	-0.795764	LVOC	NA	NA	110252740	0.109178	144657920	0.166866	295656936	0.292377	143774408	0.113661
297.062	C13H14O8	O8	CHO	13	14	8	0	0	7	-1	0.615385	1.07692	0.0408528	298.069	0.153846	0.333333	High O unsaturated	-1.7001	LVOC	314.159	181.662	182957896	0.181174	155232344	0.179064	185778896	0.183718	295284848	0.233438
227.056	C10H12O6	O6	CHO	10	12	6	0	0	5	-1	0.6	1.2	-0.0246549	228.063	0	0.285714	High O unsaturated	1.29773	SVOC	290.328	178.653	186499072	0.184681	217923808	0.25138	276581216	0.273513	293422368	0.231966
255.051	C11H12O7	O7	CHO	11	12	7	0	0	6	-1	0.636364	1.09091	-0.00297628	256.058	0.181818	0.333333	High O unsaturated	-0.154141	SVOC	301.652	179.489	175531800	0.173821	158227232	0.182519	189952416	0.187845	293036192	0.23166
197.009	C8H6O6	O6	CHO	8	6	6	0	0	6	0	0.75	0.75	-0.0192765	198.016	0.75	0.6	Aromatic	1.16078	SVOC	283.489	174.652	177531600	0.175801	143979592	0.166084	144536672	0.142933	292812472	0.231483
307.046	C14H12O8	O8	CHO	14	12	8	0	0	9	1	0.571429	0.857143	0.188407	308.053	0.285714	0.5	High O unsaturated	-2.36326	LVOC	313.095	181.246	204657704	0.202662	162449472	0.187389	183296240	0.181263	292671752	0.231372
219.051	C8H12O7	O7	CHO	8	12	7	0	0	3	-4	0.875	1.5	-0.0797479	220.058	0.25	0	Aliphatic	0.781686	SVOC	296.172	177.79	238694344	0.236367	266810384	0.307772	277560080	0.274481	292173784	0.230978
309.062	C14H14O8	O8	CHO	14	14	8	0	0	8	0	0.571429	1	-0.146762	310.069	0.142857	0.4	High O unsaturated	-2.08586	LVOC	315.44	182.146	189913672	0.188062	150982416	0.174162	167503704	0.165645	290838512	0.229923
329.088	C14H18O9	O9	CHO	14	18	9	0	0	6	-3	0.642857	1.28571	0.170333	330.095	0	0.157895	High O unsaturated	-2.60043	LVOC	325.696	184.017	239999560	0.23766	248780280	0.286974	287714144	0.284522	258219960	0.204136
345.083	C14H18O10	O10	CHO	14	18	10	0	0	6	-4	0.714286	1.28571	0.0604327	346.09	0.142857	0.111111	High O unsaturated	-3.72527	ELVOC	331.451	184.298	268062184	0.265449	251940152	0.290619	285238128	0.282074	251025104	0.198448
341.051	C14H14O10	O10	CHO	14	14	10	0	0	8	-2	0.714286	1	0.204426	342.059	0.428571	0.333333	High O unsaturated	-4.28007	ELVOC	327.628	182.73	200884504	0.198926	141180876	0.162855	170677616	0.168784	285100424	0.225387
311.041	C13H12O9	O9	CHO	13	12	9	0	0	8	-1	0.692308	0.923077	0.149656	312.048	0.461538	0.411765	High O unsaturated	-3.08391	LVOC	318.707	181.077	206299232	0.204288	147314136	0.16993	163114440	0.161305	284286688	0.224743
337.057	C15H14O9	O9	CHO	15	14	9	0	0	9	0	0.6	0.933333	0.234143	338.064	0.266667	0.428571	High O unsaturated	-3.52687	ELVOC	322.868	182.918	201667648	0.199702	154153496	0.17782	177162088	0.175197	283786200	0.224348
319.067	C12H16O10	O10	CHO	12	16	10	0	0	5	-5	0.833333	1.33333	0.101178	320.074	0.333333	0	Aliphatic	-3.40598	LVOC	327.389	182.479	238680512	0.236354	206696968	0.23843	223938720	0.221454	281410424	0.22247
327.072	C14H16O9	O9	CHO	14	16	9	0	0	7	-2	0.642857	1.14286	-0.102953	328.079	0.142857	0.263158	High O unsaturated	-2.87783	LVOC	323.904	183.266	211424176	0.209363	189206208	0.218254	218637384	0.216212	281286768	0.222372
317.088	C13H18O9	O9	CHO	13	18	9	0	0	5	-4	0.692308	1.38462	-0.042458	318.095	0	0.0588235	High O unsaturated	-2.25171	LVOC	324.225	183.487	250475368	0.248033	273017600	0.314932	280363488	0.277253	221639768	0.175218
179.035	C9H8O4	O4	CHO	9	8	4	0	0	6	2	0.444444	0.888889	-0.021802	180.042	0	0.571429	Aromatic	3.15137	IVOC	259.309	175.593	150476888	0.14901	110813308	0.127826	178134704	0.176159	279814544	0.221208
273.098	C12H18O7	O7	CHO	12	18	7	0	0	4	-3	0.583333	1.5	0.090589	274.105	-0.333333	0.0588235	High O unsaturated	0.300463	SVOC	307.966	182.349	204636376	0.202641	272461792	0.314291	277121800	0.274047	199784024	0.15794
159.03	C6H8O5	O5	CHO	6	8	5	0	0	3	-2	0.833333	1.33333	-0.0125386	160.037	0.333333	0.142857	High O unsaturated	3.21567	IVOC	267.15	174.308	144783216	0.143372	163494632	0.188595	162249104	0.160449	275593872	0.217871
269.03	C11H10O8	O8	CHO	11	10	8	0	0	7	-1	0.727273	0.909091	0.0187863	270.038	0.545455	0.428571	High O unsaturated	-1.55857	LVOC	307.908	178.858	177895984	0.176162	130902508	0.150999	148014180	0.146372	273444896	0.216172
359.062	C14H16O11	O11	CHO	14	16	11	0	0	7	-4	0.785714	1.14286	0.150665	360.069	0.428571	0.176471	High O unsaturated	-5.17633	ELVOC	334.865	183.813	NA	NA	186021712	0.21458	220172904	0.21773	272269320	0.215243
215.02	C8H8O7	O7	CHO	8	8	7	0	0	5	-2	0.875	1	-0.0490831	216.027	0.75	0.333333	High O unsaturated	0.226886	SVOC	294.909	176.012	198649376	0.196713	174140376	0.200875	193933640	0.191782	271724408	0.214812
267.051	C12H12O7	O7	CHO	12	12	7	0	0	7	0	0.583333	1	-0.128264	268.058	0.166667	0.411765	High O unsaturated	-0.531737	LVOC	303.149	179.991	165312296	0.163701	133785432	0.154325	154698088	0.152982	270757240	0.214048
235.025	C11H8O6	O6	CHO	11	8	6	0	0	8	2	0.545455	0.727273	-0.00661951	236.032	0.363636	0.625	Aromatic	0.346561	SVOC	288.272	177.2	177425672	0.175696	156420664	0.180435	175790144	0.17384	269045456	0.212694
345.046	C13H14O11	O11	CHO	13	14	11	0	0	7	-4	0.846154	1.07692	0.197581	346.054	0.615385	0.2	High O unsaturated	-5.17647	ELVOC	332.128	182.488	222055888	0.219891	152653080	0.176089	180249428	0.17825	268850864	0.212541
353.051	C15H14O10	O10	CHO	15	14	10	0	0	9	-1	0.666667	0.933333	0.142653	354.059	0.4	0.4	High O unsaturated	-4.61747	ELVOC	328.445	183.209	197879400	0.19595	137061916	0.158104	153714332	0.152009	267546448	0.211509
251.056	C12H12O6	O6	CHO	12	12	6	0	0	7	1	0.5	1	0.079023	252.063	0	0.444444	High O unsaturated	0.479726	SVOC	294.15	179.665	128311844	0.127061	109369308	0.12616	150006992	0.148343	266624296	0.21078
237.004	C10H6O7	O7	CHO	10	6	7	0	0	8	1	0.7	0.6	0.0203639	238.011	0.8	0.692308	Condensed aromatic	-0.637709	LVOC	294.509	175.888	266424296	0.263827	219237416	0.252895	192273184	0.19014	260722904	0.206115
315.036	C12H12O10	O10	CHO	12	12	10	0	0	7	-3	0.833333	1	-0.128879	316.043	0.666667	0.285714	High O unsaturated	-3.96078	ELVOC	323.971	180.848	218098912	0.215973	145613760	0.167969	160692992	0.15891	266202368	0.210447
213.04	C9H10O6	O6	CHO	9	10	6	0	0	5	-1	0.666667	1.11111	-0.0170772	214.048	0.222222	0.333333	High O unsaturated	1.38637	SVOC	287.087	177.231	173940976	0.172245	183150424	0.211268	231943176	0.22937	264317656	0.208957
339.072	C15H16O9	O9	CHO	15	16	9	0	0	8	-1	0.6	1.06667	0.00490381	340.079	0.133333	0.333333	High O unsaturated	-3.24947	LVOC	325.098	183.754	165034696	0.163426	132725004	0.153101	157634176	0.155885	261767880	0.206941
355.067	C15H16O10	O10	CHO	15	16	10	0	0	8	-2	0.666667	1.06667	-0.11992	356.074	0.266667	0.3	High O unsaturated	-4.34007	ELVOC	330.675	184.044	196635752	0.194719	150236176	0.173301	171935056	0.170028	261387536	0.20664
201.077	C9H14O5	O5	CHO	9	14	5	0	0	3	-2	0.555556	1.55556	-0.0746405	202.084	-0.444444	0.0769231	High O unsaturated	3.01335	IVOC	277.069	178.572	171866816	0.170191	202867672	0.234013	260310240	0.257422	249759384	0.197448
267.018	C8H12O8S	O8S	CHOS	8	12	8	0	1	3	-5	1	1.5	0.115794	268.025	-0.25	0	Aliphatic	-2.26706	LVOC	NA	NA	95024928	0.0940985	108128080	0.124728	259555680	0.256676	118713708	0.0938493
289.093	C12H18O8	O8	CHO	12	18	8	0	0	4	-4	0.666667	1.5	-0.0673767	290.1	-0.166667	0	Aliphatic	-0.783354	LVOC	315.761	182.649	204251776	0.202261	256348632	0.295704	229944656	0.227394	173054312	0.136808
189.077	C8H14O5	O5	CHO	8	14	5	0	0	2	-3	0.625	1.75	-0.0405076	190.084	-0.5	0	Aliphatic	3.40111	IVOC	273.684	177.97	104466508	0.103448	161632688	0.186447	155963544	0.154233	256168848	0.202515
293.03	C13H10O8	O8	CHO	13	10	8	0	0	9	1	0.615385	0.769231	0.208403	294.038	0.461538	0.555556	Aromatic	-2.2549	LVOC	309.58	179.807	213298304	0.211219	164076696	0.189266	168867744	0.166994	255632488	0.202091
359.098	C15H20O10	O10	CHO	15	20	10	0	0	6	-4	0.666667	1.33333	-0.0652162	360.106	0	0.1	High O unsaturated	-3.78527	ELVOC	334.402	185.522	224557104	0.222368	228751216	0.26387	255627912	0.252792	190480416	0.150585
269.067	C12H14O7	O7	CHO	12	14	7	0	0	6	-1	0.583333	1.16667	-0.0740087	270.074	0	0.294118	High O unsaturated	-0.254337	SVOC	304.98	180.849	170359360	0.168699	165505528	0.190914	195921008	0.193748	255291440	0.201821
323.041	C14H12O9	O9	CHO	14	12	9	0	0	9	0	0.642857	0.857143	0.0843238	324.048	0.428571	0.473684	High O unsaturated	-3.43263	LVOC	319.529	181.549	212731544	0.210658	156958792	0.181056	158864968	0.157103	254675416	0.201334
367.067	C16H16O10	O10	CHO	16	16	10	0	0	9	-1	0.625	1	0.195376	368.074	0.25	0.363636	High O unsaturated	-4.6995	ELVOC	331.626	184.519	NA	NA	128617532	0.148363	NA	NA	254317648	0.201051
347.062	C13H16O11	O11	CHO	13	16	11	0	0	6	-5	0.846154	1.23077	-0.0366474	348.069	0.461538	0.0666667	High O unsaturated	-4.89907	ELVOC	333.946	183.285	248009752	0.245592	184964000	0.21336	201615944	0.199379	254303520	0.20104
225.04	C10H10O6	O6	CHO	10	10	6	0	0	6	0	0.6	1	-0.0309345	226.048	0.2	0.428571	High O unsaturated	1.02033	SVOC	288.88	177.753	110640192	0.109562	93273608	0.107593	131909532	0.130446	252789296	0.199843
261.025	C9H10O9	O9	CHO	9	10	9	0	0	5	-4	1	1.11111	-0.0937578	262.032	0.888889	0.111111	High O unsaturated	-2.27207	LVOC	313.601	178.051	223899320	0.221717	156262560	0.180252	159971600	0.158197	252667496	0.199747
293.067	C14H14O7	O7	CHO	14	14	7	0	0	8	1	0.5	1	0.088391	294.074	0	0.428571	High O unsaturated	-1.07987	LVOC	308.147	181.824	135572624	0.134251	113450160	0.130867	142456760	0.140876	252421256	0.199552
241.035	C10H10O7	O7	CHO	10	10	7	0	0	6	-1	0.7	1	-0.127561	242.043	0.4	0.384615	High O unsaturated	-0.0829093	SVOC	298.565	178.059	155604352	0.154087	131747788	0.151974	152101000	0.150414	251810976	0.19907
277.056	C10H14O9	O9	CHO	10	14	9	0	0	4	-5	0.9	1.4	-0.116474	278.064	0.4	0	Aliphatic	-1.93408	LVOC	317.024	180.311	174163968	0.172466	151746216	0.175043	144282184	0.142682	251166048	0.19856
357.083	C15H18O10	O10	CHO	15	18	10	0	0	7	-3	0.666667	1.2	-0.0504728	358.09	0.133333	0.2	High O unsaturated	-4.06267	ELVOC	332.642	184.811	228749912	0.22652	203190728	0.234385	241339384	0.238662	250247848	0.197834
285.098	C13H18O7	O7	CHO	13	18	7	0	0	5	-2	0.538462	1.38462	0.0975294	286.105	-0.307692	0.157895	High O unsaturated	-0.101754	SVOC	310.044	182.887	172857592	0.171172	204507088	0.235904	248554392	0.245797	214929168	0.169913
221.046	C11H10O5	O5	CHO	11	10	5	0	0	7	2	0.454545	0.909091	-0.0384604	222.053	0	0.529412	Aromatic	1.59453	SVOC	279.473	177.903	125350956	0.124129	114800552	0.132425	145702784	0.144086	248069008	0.196111
193.014	C9H6O5	O5	CHO	9	6	5	0	0	7	2	0.555556	0.666667	-0.00982528	194.022	0.444444	0.692308	Condensed aromatic	1.90375	SVOC	272.272	174.811	142563824	0.141174	137945976	0.159124	150364896	0.148697	247719336	0.195835
311.077	C14H16O8	O8	CHO	14	16	8	0	0	7	-1	0.571429	1.14286	0.144927	312.085	0	0.3	High O unsaturated	-1.80846	LVOC	317.471	182.966	146268288	0.144842	130995700	0.151107	168422888	0.166554	247586560	0.19573
243.087	C11H16O6	O6	CHO	11	16	6	0	0	4	-2	0.545455	1.45455	-0.0130035	244.095	-0.363636	0.125	High O unsaturated	1.45616	SVOC	295.202	180.77	167532592	0.165899	224219520	0.258642	246899496	0.24416	198661752	0.157052
315.109	C14H20O8	O8	CHO	14	20	8	0	0	5	-3	0.571429	1.42857	-0.105787	316.116	-0.285714	0.1	High O unsaturated	-1.25366	LVOC	320.865	184.417	197258528	0.195335	238543880	0.275166	246020928	0.243292	177204552	0.140089
249.04	C12H10O6	O6	CHO	12	10	6	0	0	8	2	0.5	0.833333	-0.0976881	250.048	0.166667	0.555556	Aromatic	0.202326	SVOC	291.985	178.71	159014824	0.157465	142464576	0.164336	162490984	0.160688	243751800	0.192698
333.046	C12H14O11	O11	CHO	12	14	11	0	0	6	-5	0.916667	1.16667	-0.113094	334.054	0.666667	0.0769231	High O unsaturated	-4.92935	ELVOC	331.366	181.953	229517112	0.22728	148448268	0.171238	152254792	0.150566	243674576	0.192637
371.062	C15H16O11	O11	CHO	15	16	11	0	0	8	-3	0.733333	1.06667	-0.108478	372.069	0.4	0.263158	High O unsaturated	-5.48024	ELVOC	335.721	184.317	206346592	0.204335	144938480	0.16719	168867888	0.166995	242916768	0.192038
252.999	C10H6O8	O8	CHO	10	6	8	0	0	8	0	0.8	0.6	0.0799009	254.006	1	0.666667	Aromatic	-1.81114	LVOC	302.898	176.175	242705544	0.240339	197024112	0.227272	149450528	0.147793	175595216	0.138817
291.036	C10H12O10	O10	CHO	10	12	10	0	0	5	-5	1	1.2	0.21058	292.043	0.8	0	Aliphatic	-3.49427	LVOC	322.419	179.753	201434968	0.199471	135042828	0.155775	139375184	0.137829	241868472	0.19121
321.062	C15H14O8	O8	CHO	15	14	8	0	0	9	1	0.533333	0.933333	-0.162824	322.069	0.133333	0.454545	High O unsaturated	-2.49231	LVOC	316.632	182.609	153616432	0.152119	125630768	0.144918	137301872	0.135779	238682792	0.188691
373.078	C15H18O11	O11	CHO	15	18	11	0	0	7	-4	0.733333	1.2	-0.0574177	374.085	0.266667	0.157895	High O unsaturated	-5.20284	ELVOC	337.688	185.083	238460616	0.236136	198220448	0.228652	224837200	0.222343	230335024	0.182092
343.103	C15H20O9	O9	CHO	15	20	9	0	0	6	-3	0.6	1.33333	-0.149168	344.111	-0.133333	0.142857	High O unsaturated	-2.69467	LVOC	328.824	185.235	201869224	0.199901	216155824	0.249341	238312592	0.235669	190074968	0.150264
351.072	C16H16O9	O9	CHO	16	16	9	0	0	9	0	0.5625	1	-0.0967244	352.079	0.125	0.391304	High O unsaturated	-3.64129	ELVOC	326.214	184.222	158949488	0.1574	123887656	0.142907	140670964	0.13911	237791608	0.187987
361.078	C14H18O11	O11	CHO	14	18	11	0	0	6	-5	0.785714	1.28571	-0.0733335	362.085	0.285714	0.0588235	High O unsaturated	-4.89893	ELVOC	336.656	184.563	237403608	0.235089	199130320	0.229701	211982576	0.209631	211846480	0.167476
281.067	C13H14O7	O7	CHO	13	14	7	0	0	7	0	0.538462	1.07692	0.00412529	282.074	0	0.368421	High O unsaturated	-0.656554	LVOC	306.624	181.349	125145108	0.123925	107380396	0.123866	134945404	0.133448	236684712	0.187112
313.093	C14H18O8	O8	CHO	14	18	8	0	0	6	-2	0.571429	1.28571	0.111443	314.1	-0.142857	0.2	High O unsaturated	-1.53106	LVOC	319.262	183.719	181921480	0.180148	196009208	0.226101	236057736	0.233439	233694744	0.184748
171.03	C7H8O5	O5	CHO	7	8	5	0	0	4	-1	0.714286	1.14286	-0.0382993	172.037	0.285714	0.333333	High O unsaturated	2.91733	IVOC	269.717	174.889	129642692	0.128379	143570760	0.165612	177796472	0.175824	233699280	0.184751
231.015	C8H8O8	O8	CHO	8	8	8	0	0	5	-3	1	1	-0.0159456	232.022	1	0.25	High O unsaturated	-1.04987	LVOC	304.024	176.273	202589904	0.200615	155010528	0.178808	167531036	0.165672	233654856	0.184716
372.166	C17H27NO8	NO8	CHNO	17	27	8	1	0	5	-3	0.470588	1.58824	0.00136438	373.174	-0.941176	0	Aliphatic	-3.57682	ELVOC	NA	NA	134192220	0.132884	115775616	0.13355	231521160	0.228953	95395872	0.0754154
331.103	C14H20O9	O9	CHO	14	20	9	0	0	5	-4	0.642857	1.42857	-0.117644	332.111	-0.142857	0.0526316	High O unsaturated	-2.32303	LVOC	327.298	184.714	198975712	0.197036	227941664	0.262936	227291768	0.22477	162670312	0.128599
297.025	C12H10O9	O9	CHO	12	10	9	0	0	8	-1	0.75	0.833333	0.185673	298.033	0.666667	0.466667	High O unsaturated	-3.03879	LVOC	315.655	179.631	187610928	0.185782	129214528	0.149052	129843896	0.128403	225620056	0.178364
255.015	C10H8O8	O8	CHO	10	8	8	0	0	7	-1	0.8	0.8	-0.0870236	256.022	0.8	0.5	High O unsaturated	-1.53374	LVOC	305.182	177.333	174548744	0.172847	126999324	0.146497	116814224	0.115518	224813216	0.177726
341.088	C15H18O9	O9	CHO	15	18	9	0	0	7	-2	0.6	1.2	0.0743392	342.095	0	0.238095	High O unsaturated	-2.97207	LVOC	327.065	184.523	171262264	0.169593	161693680	0.186517	193353096	0.191208	224283040	0.177307
199.025	C8H8O6	O6	CHO	8	8	6	0	0	5	-1	0.75	1	0.00361379	200.032	0.5	0.4	High O unsaturated	1.43818	SVOC	284.386	175.732	137753312	0.13641	132447284	0.152781	152075448	0.150388	224165584	0.177214
323.077	C15H16O8	O8	CHO	15	16	8	0	0	8	0	0.533333	1.06667	-0.0186447	324.085	0	0.363636	High O unsaturated	-2.21491	LVOC	318.862	183.447	128714420	0.12746	108134504	0.124736	124524136	0.123143	221907448	0.175429
357.046	C14H14O11	O11	CHO	14	14	11	0	0	8	-3	0.785714	1	-0.0847472	358.054	0.571429	0.294118	High O unsaturated	-5.45373	ELVOC	332.834	182.997	184578616	0.182779	118190516	0.136335	131828700	0.130366	220625552	0.174416
239.056	C11H12O6	O6	CHO	11	12	6	0	0	6	0	0.545455	1.09091	-0.000538713	240.063	0	0.375	High O unsaturated	0.901361	SVOC	292.326	179.173	107467472	0.10642	95211020	0.109828	123592172	0.122221	219304656	0.173372
383.062	C16H16O11	O11	CHO	16	16	11	0	0	9	-2	0.6875	1	-0.0744575	384.069	0.375	0.333333	High O unsaturated	-5.80785	ELVOC	336.521	184.799	178829464	0.177086	120107072	0.138546	129883012	0.128442	219068264	0.173185
309.025	C13H10O9	O9	CHO	13	10	9	0	0	9	0	0.692308	0.769231	-0.146466	310.032	0.615385	0.529412	Aromatic	-3.36131	LVOC	316.226	180.102	217438760	0.215319	152227568	0.175598	133883716	0.132398	204265432	0.161482
161.046	C6H10O5	O5	CHO	6	10	5	0	0	2	-3	0.833333	1.66667	-0.0148322	162.053	0	0	Aliphatic	3.49307	IVOC	266.459	175.171	92143800	0.0912455	115541172	0.133279	100598592	0.0994826	215729272	0.170545
240.999	C9H6O8	O8	CHO	9	6	8	0	0	7	-1	0.888889	0.666667	0.0269317	242.006	1.11111	0.6	Aromatic	-1.54674	LVOC	303.006	175.701	215700848	0.213598	180768704	0.208521	121921660	0.120569	213603480	0.168865
369.083	C16H18O10	O10	CHO	16	18	10	0	0	8	-2	0.625	1.125	-0.00311546	370.09	0.125	0.272727	High O unsaturated	-4.4221	ELVOC	333.757	185.302	163484688	0.161891	130322736	0.15033	161329696	0.15954	214210824	0.169345
247.082	C10H16O7	O7	CHO	10	16	7	0	0	3	-4	0.7	1.6	-0.0600854	248.09	-0.2	0	Aliphatic	0.749291	SVOC	302.296	180.503	153050432	0.151558	211244216	0.243675	203384848	0.201129	148527572	0.117419
299.114	C14H20O7	O7	CHO	14	20	7	0	0	5	-2	0.5	1.42857	0.202077	300.121	-0.428571	0.142857	High O unsaturated	-0.247674	SVOC	313.572	184.099	140950784	0.139577	168341152	0.194185	210618560	0.208282	171161312	0.135312
281.034	C9H14O8S	O8S	CHOS	9	14	8	0	1	3	-5	0.888889	1.55556	0.108595	282.041	-0.444444	0	Aliphatic	-2.30399	LVOC	NA	NA	82841604	0.082034	100564636	0.116004	210475624	0.208141	110462360	0.0873262
369.046	C15H14O11	O11	CHO	15	14	11	0	0	9	-2	0.733333	0.933333	-0.111737	370.054	0.533333	0.368421	High O unsaturated	-5.75764	ELVOC	333.491	183.483	168858616	0.167212	105222424	0.121376	113422852	0.112165	210278648	0.166236
327.036	C13H12O10	O10	CHO	13	12	10	0	0	8	-2	0.769231	0.923077	-0.109192	328.043	0.615385	0.375	High O unsaturated	-4.24498	ELVOC	324.653	181.353	168891280	0.167245	110890652	0.127915	113648688	0.112388	210245712	0.16621
379.067	C17H16O10	O10	CHO	17	16	10	0	0	10	0	0.588235	0.941176	0.0569711	380.074	0.235294	0.416667	High O unsaturated	-5.07852	ELVOC	332.519	184.974	154775152	0.153266	115189736	0.132874	126537740	0.125134	210153256	0.166137
365.051	C16H14O10	O10	CHO	16	14	10	0	0	10	0	0.625	0.875	0.164723	366.059	0.375	0.454545	High O unsaturated	-4.9769	ELVOC	329.209	183.666	NA	NA	115509040	0.133242	124757400	0.123373	209620840	0.165716
339.036	C14H12O10	O10	CHO	14	12	10	0	0	9	-1	0.714286	0.857143	-0.115544	340.043	0.571429	0.444444	High O unsaturated	-4.55747	ELVOC	325.283	181.833	190069416	0.188216	125909228	0.145239	117657184	0.116352	209601200	0.165701
285.025	C11H10O9	O9	CHO	11	10	9	0	0	7	-2	0.818182	0.909091	-0.0511489	286.032	0.727273	0.384615	High O unsaturated	-2.74639	LVOC	315.033	179.134	153262280	0.151768	105973668	0.122243	109060964	0.107851	209424104	0.165561
219.015	C7H8O8	O8	CHO	7	8	8	0	0	4	-4	1.14286	1.14286	-0.08562	220.022	1.14286	0	Aliphatic	-0.884314	LVOC	303.331	175.688	182464432	0.180686	126432252	0.145843	109853436	0.108635	209008592	0.165232
385.078	C16H18O11	O11	CHO	16	18	11	0	0	8	-3	0.6875	1.125	0.0534788	386.085	0.25	0.238095	High O unsaturated	-5.53045	ELVOC	338.653	185.581	175291816	0.173583	140096592	0.161605	165142840	0.163311	208845680	0.165103
241.072	C11H14O6	O6	CHO	11	14	6	0	0	5	-1	0.545455	1.27273	-0.100241	242.079	-0.181818	0.25	High O unsaturated	1.17876	SVOC	293.867	180.009	129783180	0.128518	145805264	0.16819	175071376	0.173129	208557224	0.164875
333.083	C13H18O10	O10	CHO	13	18	10	0	0	5	-5	0.769231	1.38462	-0.0191979	334.09	0.153846	0	Aliphatic	-3.41278	LVOC	330.17	183.76	206972760	0.204955	194454576	0.224308	198326632	0.196126	190131696	0.150309
387.093	C16H20O11	O11	CHO	16	20	11	0	0	7	-4	0.6875	1.25	-0.0897148	388.101	0.125	0.142857	High O unsaturated	-5.25305	ELVOC	340.559	186.305	205046448	0.203047	178305096	0.205679	206366416	0.204077	182632312	0.14438
381.083	C17H18O10	O10	CHO	17	18	10	0	0	9	-1	0.588235	1.05882	-0.112758	382.09	0.117647	0.333333	High O unsaturated	-4.80112	ELVOC	334.804	185.773	149140376	0.147686	114076712	0.13159	131978716	0.130515	205697880	0.162615
268.994	C10H6O9	O9	CHO	10	6	9	0	0	8	-1	0.9	0.6	0.178947	270.001	1.2	0.636364	Aromatic	-3.04368	LVOC	310.298	176.445	204962344	0.202964	169568736	0.195601	95126616	0.0940713	141717528	0.112035
263.041	C9H12O9	O9	CHO	9	12	9	0	0	4	-5	1	1.33333	-0.056198	264.048	0.666667	0	Aliphatic	-1.99467	LVOC	314.633	178.917	157643120	0.156106	119399092	0.13773	112458688	0.111211	204695712	0.161823
389.073	C15H18O12	O12	CHO	15	18	12	0	0	7	-5	0.8	1.2	0.145584	390.08	0.4	0.111111	High O unsaturated	-6.38707	ELVOC	342.294	185.341	202950544	0.200972	150780952	0.173929	173861960	0.171933	193119064	0.152671
373.114	C16H22O10	O10	CHO	16	22	10	0	0	6	-4	0.625	1.375	0.0661353	374.121	-0.125	0.0909091	High O unsaturated	-3.8673	ELVOC	337.388	186.704	165846744	0.16423	179346096	0.20688	201899624	0.19966	136028736	0.107538
375.093	C15H20O11	O11	CHO	15	20	11	0	0	6	-5	0.733333	1.33333	-0.0127513	376.101	0.133333	0.0526316	High O unsaturated	-4.92544	ELVOC	339.447	185.793	201892880	0.199925	187866928	0.216709	201639000	0.199402	163882664	0.129558
287.114	C13H20O7	O7	CHO	13	20	7	0	0	4	-3	0.538462	1.53846	0.122991	288.121	-0.461538	0.0526316	High O unsaturated	0.175646	SVOC	311.478	183.57	145333680	0.143917	201755848	0.23273	190556264	0.188442	141857836	0.112146
283.082	C13H16O7	O7	CHO	13	16	7	0	0	6	-1	0.538462	1.23077	-0.0637276	284.09	-0.153846	0.263158	High O unsaturated	-0.379154	SVOC	308.442	182.151	130913392	0.129637	132547356	0.152896	156344040	0.15461	200444480	0.158462
257.103	C12H18O6	O6	CHO	12	18	6	0	0	4	-2	0.5	1.5	0.0942457	258.11	-0.5	0.111111	High O unsaturated	1.31193	SVOC	298.967	182.026	126347684	0.125116	168647920	0.194539	198407200	0.196206	160064136	0.126539
353.088	C16H18O9	O9	CHO	16	18	9	0	0	8	-1	0.5625	1.125	-0.159169	354.095	0	0.304348	High O unsaturated	-3.36389	LVOC	328.345	185.007	130901636	0.129625	108160568	0.124766	128679608	0.127252	197160808	0.155866
397.078	C17H18O11	O11	CHO	17	18	11	0	0	9	-2	0.647059	1.05882	0.153257	398.085	0.235294	0.304348	High O unsaturated	-5.87922	ELVOC	339.559	186.058	150133512	0.14867	112380604	0.129634	131924372	0.130461	195875496	0.15485
335.077	C16H16O8	O8	CHO	16	16	8	0	0	9	1	0.5	1	0.0213749	336.085	0	0.416667	High O unsaturated	-2.63947	LVOC	320.164	183.906	109718992	0.108649	91401008	0.105433	107331700	0.106141	195835128	0.154818
279.015	C12H8O8	O8	CHO	12	8	8	0	0	9	1	0.666667	0.666667	0.0970816	280.022	0.666667	0.625	Aromatic	-2.17035	LVOC	306.128	178.273	187861976	0.186031	132414060	0.152743	134157868	0.13267	195068232	0.154212
227.02	C9H8O7	O7	CHO	9	8	7	0	0	6	-1	0.777778	0.888889	-0.131616	228.027	0.666667	0.454545	High O unsaturated	-0.046074	SVOC	295.903	176.546	115163116	0.11404	82559192	0.0952339	98749260	0.0976538	194462984	0.153733
263.056	C13H12O6	O6	CHO	13	12	6	0	0	8	2	0.461538	0.923077	-0.0868619	264.063	0	0.5	Low O unsaturated	0.0368102	SVOC	295.828	180.131	103117176	0.102112	91415228	0.10545	113474500	0.112216	194275488	0.153585
307.082	C15H16O7	O7	CHO	15	16	7	0	0	8	1	0.466667	1.06667	0.16326	308.09	-0.133333	0.391304	Low O unsaturated	-1.24402	LVOC	311.794	183.117	91903044	0.0910071	82430048	0.095085	107208972	0.10602	194236712	0.153554
371.098	C16H20O10	O10	CHO	16	20	10	0	0	7	-3	0.625	1.25	0.196671	372.106	0	0.181818	High O unsaturated	-4.1447	ELVOC	335.664	186.028	NA	NA	162174464	0.187072	NA	NA	192716208	0.152352
375.057	C14H16O12	O12	CHO	14	16	12	0	0	7	-5	0.857143	1.14286	0.0715405	376.064	0.571429	0.125	High O unsaturated	-6.39317	ELVOC	339.617	184.065	192586752	0.190709	124755740	0.143909	138724408	0.137185	191276680	0.151214
277.035	C13H10O7	O7	CHO	13	10	7	0	0	9	2	0.538462	0.769231	0.0134646	278.043	0.307692	0.578947	Aromatic	-1.21135	LVOC	302.046	179.491	127404024	0.126162	100431520	0.11585	118526528	0.117212	192183632	0.151931
291.051	C14H12O7	O7	CHO	14	12	7	0	0	9	2	0.5	0.857143	-0.042705	292.058	0.142857	0.52381	Aromatic	-1.35727	LVOC	305.802	180.923	112928612	0.111828	93263640	0.107582	110113372	0.108892	191471304	0.151368
349.056	C16H14O9	O9	CHO	16	14	9	0	0	10	1	0.5625	0.875	-0.15288	350.064	0.25	0.478261	High O unsaturated	-3.91869	ELVOC	323.798	183.368	141515336	0.140136	102455788	0.118185	113406240	0.112148	190931808	0.150941
199.061	C9H12O5	O5	CHO	9	12	5	0	0	4	-1	0.555556	1.33333	-0.0787682	200.068	-0.222222	0.230769	High O unsaturated	2.73595	IVOC	276.197	177.787	118551300	0.117396	158301272	0.182604	190840024	0.188723	189791992	0.15004
395.062	C17H16O11	O11	CHO	17	16	11	0	0	10	-1	0.647059	0.941176	-0.120261	396.069	0.352941	0.391304	High O unsaturated	-6.15662	ELVOC	337.273	185.26	157341232	0.155807	107857708	0.124416	116587604	0.115294	189189840	0.149564
325.093	C15H18O8	O8	CHO	15	18	8	0	0	7	-1	0.533333	1.2	0.197697	326.1	-0.133333	0.272727	High O unsaturated	-1.93751	LVOC	320.83	184.217	117017920	0.115877	104892324	0.120996	136256868	0.134745	188551496	0.14906
303.109	C13H20O8	O8	CHO	13	20	8	0	0	4	-4	0.615385	1.53846	0.048737	304.116	-0.307692	0	Aliphatic	-0.867903	LVOC	319.013	183.879	139053176	0.137698	188201792	0.217095	163894448	0.162076	126272456	0.0998249
387.057	C15H16O12	O12	CHO	15	16	12	0	0	8	-4	0.8	1.06667	0.199377	388.064	0.533333	0.222222	High O unsaturated	-6.66447	ELVOC	340.327	184.575	164414104	0.162811	112572468	0.129855	132441784	0.130973	187875168	0.148525
163.025	C5H8O6	O6	CHO	5	8	6	0	0	2	-4	1.2	1.6	-0.0567235	164.032	0.8	0	Aliphatic	2.10447	SVOC	278.65	173.931	48216574	0.0477465	40746628	0.0470022	30606575	0.030267	187092592	0.147906
381.046	C16H14O11	O11	CHO	16	14	11	0	0	10	-1	0.6875	0.875	0.0819945	382.054	0.5	0.428571	High O unsaturated	-6.08525	ELVOC	334.105	183.947	161657720	0.160082	103722004	0.119646	107042244	0.105855	186954560	0.147797
345.119	C15H22O9	O9	CHO	15	22	9	0	0	5	-4	0.6	1.46667	-0.161359	346.126	-0.266667	0.047619	High O unsaturated	-2.41727	LVOC	330.416	185.899	157109760	0.155578	186600792	0.215248	180970384	0.178963	122246892	0.0966425
335.041	C15H12O9	O9	CHO	15	12	9	0	0	10	1	0.6	0.8	0.203933	336.048	0.4	0.52381	Aromatic	-3.80427	ELVOC	320.293	181.999	142093744	0.140708	100838160	0.116319	111099984	0.109867	186135768	0.14715
363.072	C17H16O9	O9	CHO	17	16	9	0	0	10	1	0.529412	0.941176	0.0243322	364.079	0.117647	0.44	High O unsaturated	-4.05095	ELVOC	327.263	184.67	115442552	0.114317	91259412	0.10527	108109648	0.10691	185174640	0.14639
209.046	C10H10O5	O5	CHO	10	10	5	0	0	6	1	0.5	1	-0.0738592	210.053	0	0.466667	High O unsaturated	2.03933	SVOC	277.426	177.424	77927828	0.0771681	61955364	0.0714669	93708396	0.0926688	184459368	0.145825
[truncated: 5,262 more rows]

## Sheet: DS3_Formula assigments_LDIextr
Measured mass	Neutral formula	Class	Group	C	H	O	N	S	DBE	DBEO	O/C	H/C	Formula error (ppm)	Neutral mass	OSc	AI_mod	AImod_class	log10C0	Volatility class	Tgdry	prop.err.Tgdry	BB1011_abd	BB1011_n_abd	BB1314_abd	BB1314_n_abd
[truncated: 1,642 more rows]
